# Supplementary material for: Oncoproteomic Analysis Reveals Co-Upregulation of RELA and STAT5 in Carboplatin Resistant Ovarian Carcinoma
Source: PLoS One. 2010 Jun 18;5(6):e11198. doi: 10.1371/journal.pone.0011198 (PMC2887843; doi:10.1371/journal.pone.0011198)
Supplement: Table S2 — The expression of all proteins identified from the 9 pairs of primary and recurrent ovarian cancer samples (the 24 candidate proteins are highlighted in yellow). (2.70 MB XLS) [file pone.0011198.s007.xls]

## Sheet: Table S2
Table S2. The expression of all proteins identified from the 9 pairs of primary and recurrent ovarian cancer samples (the 24 candidate proteins are highlighted in yellow)
Protein	Accession	Definition	Uniprot ID	Transmembrane domain (No,Yes)	Paired t-test p value	ratio_Pair1	ratio_Pair2	ratio_Pair3	ratio_Pair4	ratio_Pair5	ratio_Pair6	ratio_Pair7	ratio_Pair8	ratio_Pair9	No. of pair with >2-fold increase in recurrent tumor
508823	P55008	Allograft inflammatory factor 1 (AIF-1) (Ionized calcium-binding adapter molecule 1) (Protein G1) - Homo sapiens (Human)	AIF1_HUMAN	N	0.00967065	3.40269	11.3332	12.5779	4.40836	17.0357	6.20255	3.49474	1	5.41515	8
518560	P08567	Pleckstrin (Platelet p47 protein) - Homo sapiens (Human)	PLEK_HUMAN	N	0.0272293	2.28007	13.7789	3.10462	2.36783	6.03185	8.15792	4.83504	1	3.79672	8
522503	Q8IV90	Wiskott-Aldrich syndrome protein family member 4 (WASP-family protein member 4) - Homo sapiens (Human)	WASF4_HUMAN	N	0.000131113	3.40269	4.89129	1	3.11483	4.24106	3.02769	4.10105	1	3.79672	7
508668	Q9NR19	Acetyl-coenzyme A synthetase, cytoplasmic (EC 6.2.1.1) (Acetate--CoA ligase) (Acyl-activating enzyme) (Acetyl-CoA synthetase) (ACS) (AceCS) (Acyl-CoA synthetase short-chain family member 2) - Homo sapiens (Human)	ACSA_HUMAN	N	0.00146612	6.80538	1	3.99672	6.99574	4.24106	3.02769	0.30297	7.33878	5.55512	7
519478	P51606	N-acylglucosamine 2-epimerase (EC 5.1.3.8) (GlcNAc 2-epimerase) (N-acetyl-D-glucosamine 2-epimerase) (AGE) (Renin-binding protein) (RnBP) - Homo sapiens (Human)	RENBP_HUMAN	N	0.00397494	5.80175	9.78258	5.28975	2.33831	8.62501	1	8.2021	1	3.65676	7
508530	P01011	Alpha-1-antichymotrypsin precursor (ACT) [Contains: Alpha-1-antichymotrypsin His-Pro-less] - Homo sapiens (Human)	AACT_HUMAN	N	0.0473753	3.63466	5.05918	3.3241	0.567761	6.99159	2.50397	22.6282	0.0208025	2.02664	7
514008	P08631	Tyrosine-protein kinase HCK (EC 2.7.10.2) (p59-HCK/p60-HCK) (Hemopoietic cell kinase) - Homo sapiens (Human)	HCK_HUMAN	N	0.091187	3.40269	10.8163	12.1405	1.33309	23.7545	2.7466	2.36359	0.649775	3.51679	7
522502	Q9UPY6	Wiskott-Aldrich syndrome protein family member 3 (WASP-family protein member 3) (Protein WAVE-3) (Verprolin homology domain-containing protein 3) - Homo sapiens (Human)	WASF3_HUMAN	N	0.00146733	3.40269	4.89129	1	3.11483	1	3.02769	4.10105	1	3.79672	6
520628	P51692	Signal transducer and activator of transcription 5B - Homo sapiens (Human)	STA5B_HUMAN	N	0.00172876	1	5.92505	3.99672	1.62317	6.43303	6.64408	4.10105	1	3.51679	6
514791	Q86YS7	Protein KIAA0528 - Homo sapiens (Human)	K0528_HUMAN	N	0.00272265	3.40269	4.89129	1	6.22966	8.62501	1	8.54295	1	5.55512	6
514931	Q6NYC8	Protein KIAA1949 - Homo sapiens (Human)	K1949_HUMAN	N	0.00414748	1	4.89129	8.63996	10.3659	6.50448	3.02769	4.78274	1	0.881132	6
522428	O95183	Vesicle-associated membrane protein 5 (VAMP-5) (Myobrevin) - Homo sapiens (Human)	VAMP5_HUMAN	Y	0.00441582	1	7.85382	2.32481	6.74038	4.38395	6.05538	6.83327	1	1	6
510747	O75503	Ceroid-lipofuscinosis neuronal protein 5 (Protein CLN5) - Homo sapiens (Human)	CLN5_HUMAN	N	0.00519387	3.40269	1	3.99672	1	8.62501	3.32204	1	3.93434	3.51679	6
520627	P42229	Signal transducer and activator of transcription 5A - Homo sapiens (Human)	STA5A_HUMAN	N	0.00588645	1	5.92505	3.99672	2.01298	6.43303	6.64408	1.19433	1	3.51679	6
510029	P29466	Caspase-1 precursor (EC 3.4.22.36) (CASP-1) (Interleukin-1 beta convertase) (IL-1BC) (IL-1 beta-converting enzyme) (ICE) (Interleukin-1 beta-converting enzyme) (p45) [Contains: Caspase-1 p20 subunit; Caspase-1 p10 subunit] - Homo sapie	CASP1_HUMAN	N	0.0108185	1.31715	9.78258	5.91051	2.56258	19.5134	1	1	9.96834	7.03359	6
514243	P01763	Ig heavy chain V-III region WEA - Homo sapiens (Human)	HV3B_HUMAN	N	0.0180202	6.80538	3.22391	1.44308	3.11483	2.95539	1.39267	2.48792	0.281925	3.45224	6
514247	P01767	Ig heavy chain V-III region BUT - Homo sapiens (Human)	HV3F_HUMAN	N	0.0180202	6.80538	3.22391	1.44308	3.11483	2.95539	1.39267	2.48792	0.281925	3.45224	6
522512	Q9UI12	Vacuolar ATP synthase subunit H (EC 3.6.3.14) (V-ATPase H subunit) (Vacuolar proton pump subunit H) (V-ATPase 50/57 kDa subunits) (Vacuolar proton pump subunit SFD) (VMA13) (Nef-binding protein 1) (NBP1) - Homo sapiens (Human)	VATH_HUMAN	N	0.0298448	10.2081	2.829	1.66018	2.57964	2.52893	1.53717	1.28542	3.66939	3.65676	6
508512	Q7Z5R6	Amyloid beta A4 precursor protein-binding family B member 1-interacting protein (APBB1-interacting protein 1) (Rap1-GTP-interacting adapter molecule) (RIAM) (Proline-rich EVH1 ligand 1) (PREL-1) (Proline-rich protein 73) (Retinoic acid	AB1IP_HUMAN	N	0.0320541	1	4.89129	27.9771	2.06972	25.875	3.32204	11.2752	1	1	6
521200	Q04206	Transcription factor p65 (Nuclear factor NF-kappa-B p65 subunit) - Homo sapiens (Human)	TF65_HUMAN	N	0.0336591	5.80175	0.137338	4.64323	3.64591	4.38395	3.32204	2.18907	0.852637	0.850624	6
513205	Q8WWP7	GTPase, IMAP family member 1 (Immunity-associated protein 1) (hIMAP1) - Homo sapiens (Human)	GIMA1_HUMAN	Y	0.03567	1.21272	12.8661	1.74609	0.899459	9.15323	4.42997	4.21334	7.33878	2.02134	6
512717	P41212	Transcription factor ETV6 (ETS-related protein Tel1) (Tel) (ETS translocation variant 6) - Homo sapiens (Human)	ETV6_HUMAN	N	0.0370926	3.40269	0.32212	9.28647	0.894533	4.24106	3.02769	6.49242	0.575986	3.51679	6
514359	P50135	Histamine N-methyltransferase (EC 2.1.1.8) (HMT) - Homo sapiens (Human)	HNMT_HUMAN	N	0.0408863	1	1	4.64323	2.46671	15.2009	6.05538	0.30297	3.66939	3.51679	6
522239	P41226	Ubiquitin-activating enzyme E1 homolog (D8) - Homo sapiens (Human)	UBE1L_HUMAN	N	0.0487876	3.40269	1	3.99672	2.53063	8.48212	6.05538	1.39285	0.36973	7.59345	6
510173	P25774	Cathepsin S precursor (EC 3.4.22.27) - Homo sapiens (Human)	CATS_HUMAN	N	0.0515041	3.40269	15.5122	1.0765	0.718415	7.07478	9.37741	3.24729	1	3.65676	6
520808	Q13586	Stromal interaction molecule 1 precursor - Homo sapiens (Human)	STIM1_HUMAN	Y	0.0575189	1	4.89129	1.35273	2.00299	1	2.32691	3.08508	3.93434	3.79672	6
511426	P98082	Disabled homolog 2 (Differentially expressed protein 2) (DOC-2) - Homo sapiens (Human)	DAB2_HUMAN	N	0.0587064	3.40269	4.89129	0.987507	2.60336	19.2277	3.63339	19.1364	1	1	6
512466	P42566	Epidermal growth factor receptor substrate 15 (Protein Eps15) (AF-1p protein) - Homo sapiens (Human)	EP15_HUMAN	N	0.0615519	1	4.89129	2.53797	2.13783	13.009	6.20255	1.83848	0.093975	7.17355	6
515364	P43405	Tyrosine-protein kinase SYK (EC 2.7.10.2) (Spleen tyrosine kinase) - Homo sapiens (Human)	KSYK_HUMAN	N	0.065397	6.80538	4.89129	3.80185	0.922772	5.01256	3.02769	2.73955	0.281925	0.951269	6
516665	O00160	Myosin If (Myosin-IE) - Homo sapiens (Human)	MYO1F_HUMAN	N	0.0718466	6.80538	3.15117	7.82486	1.7315	32.0937	0.929902	9.05514	1	3.85291	6
511264	P57737	Coronin-7 (70 kDa WD repeat tumor rejection antigen homolog) - Homo sapiens (Human)	CORO7_HUMAN	N	0.0733909	2.42544	4.89324	6.44035	1.43409	69.0715	7.86357	5.10802	1	0.951269	6
508860	P48448	Aldehyde dehydrogenase 3B2 (EC 1.2.1.5) (Aldehyde dehydrogenase 8) - Homo sapiens (Human)	AL3B2_HUMAN	N	0.0736857	3.40269	7.85382	31.8561	0.894533	0.85636	3.02769	3.34851	3.66939	1	6
519832	O00560	Syntenin-1 (Syndecan-binding protein 1) (Melanoma differentiation-associated protein 9) (MDA-9) (Scaffold protein Pbp1) (Pro-TGF-alpha cytoplasmic domain-interacting protein 18) (TACIP18) - Homo sapiens (Human)	SDCB1_HUMAN	Y	0.0738509	3.40269	1.59476	5.1375	0.937537	30.1875	3.17486	3.93402	1	3.51679	6
520561	Q9HB58	Sp110 nuclear body protein (Speckled 110 kDa) (Transcriptional coactivator Sp110) (Interferon-induced protein 41/75) - Homo sapiens (Human)	SP110_HUMAN	N	0.0833338	0.165925	4.89129	2.80345	0.917913	5.4547	6.4969	0.465472	2.30394	10.9703	6
509075	P05090	Apolipoprotein D precursor (Apo-D) (ApoD) - Homo sapiens (Human)	APOD_HUMAN	N	0.0839722	1	33.8609	2.51285	1.21597	5.89683	6.4969	3.17081	1	3.51679	6
515612	P33241	Lymphocyte-specific protein 1 (Protein pp52) (52 kDa phosphoprotein) (Lymphocyte-specific antigen WP34) (47 kDa actin-binding protein) - Homo sapiens (Human)	LSP1_HUMAN	N	0.088217	1.14646	8.51738	2.697	0.992332	2.929	4.55843	2.85251	3.66939	1.80856	6
509723	Q86VB7	Scavenger receptor cysteine-rich type 1 protein M130 precursor (CD163 antigen) (Hemoglobin scavenger receptor) [Contains: Soluble CD163 (sCD163)] - Homo sapiens (Human)	C163A_HUMAN	Y	0.0894649	3.04426	18.7584	0.809945	0.85923	32.2915	4.78826	4.79	1	2.90474	6
513100	O00602	Ficolin-1 precursor (Collagen/fibrinogen domain-containing protein 1) (Ficolin-A) (Ficolin A) (M-Ficolin) - Homo sapiens (Human)	FCN1_HUMAN	N	0.102258	9.90216	8.74309	2.1764	0.761239	38.7411	12.5523	1.0536	1	7.03359	6
522477	Q86UX7	Unc-112-related protein 2 (Kindlin-3) (MIG2-like) - Homo sapiens (Human)	URP2_HUMAN	N	0.102752	9.90216	15.0127	4.61804	1.39826	3.60318	0.711154	5.17596	1	4.44073	6
520466	O00161	Synaptosomal-associated protein 23 (SNAP-23) (Vesicle-membrane fusion protein SNAP-23) - Homo sapiens (Human)	SNP23_HUMAN	N	0.109351	0.217355	12.7451	2.89746	2.33707	6.43303	3.17486	0.676451	3.66939	1.02651	6
516063	O00754	Lysosomal alpha-mannosidase precursor (EC 3.2.1.24) (Mannosidase, alpha B) (Lysosomal acid alpha-mannosidase) (Laman) (Mannosidase alpha class 2B member 1) [Contains: Lysosomal alpha-mannosidase A peptide; Lysosomal alpha-mannosidase B	MA2B1_HUMAN	N	0.112314	0.217355	4.10545	2.06324	2.09338	83.9867	2.13346	4.4419	1.62626	1	6
512703	P00488	Coagulation factor XIII A chain precursor (EC 2.3.2.13) (Coagulation factor XIIIa) (Protein-glutamine gamma-glutamyltransferase A chain) (Transglutaminase A chain) - Homo sapiens (Human)	F13A_HUMAN	N	0.150725	1	31.4153	2.42393	1.6037	2.07272	3.47999	3.23872	0.281925	2.99208	6
513050	P02679	Fibrinogen gamma chain precursor - Homo sapiens (Human)	FIBG_HUMAN	Y	0.173209	8.89893	6.19087	1.00805	0.949296	0.233066	12.8562	6.60952	2.23775	3.82211	6
513038	P02671	Fibrinogen alpha chain precursor [Contains: Fibrinopeptide A] - Homo sapiens (Human)	FIBA_HUMAN	N	0.173882	22.7917	6.53438	0.962611	1.43227	0.196648	10.6936	11.4171	3.37811	4.75595	6
519003	P06737	Glycogen phosphorylase, liver form (EC 2.4.1.1) - Homo sapiens (Human)	PYGL_HUMAN	N	0.182504	2.53141	2.43675	3.90071	1.42679	3.36496	2.65938	4.71013	0.670106	0.335412	6
510606	Q9BY43	Charged multivesicular body protein 4a (Chromatin-modifying protein 4a) (CHMP4a) (Vacuolar protein sorting 7-1) (SNF7-1) (hSnf-1) (SNF7 homolog associated with Alix-2) - Homo sapiens (Human)	CHM4A_HUMAN	N	0.188403	6.49946	0.16106	4.64323	10.8767	4.24106	3.17486	0.398109	2.14368	1	6
512155	Q8NF50	Dedicator of cytokinesis protein 8 - Homo sapiens (Human)	DOCK8_HUMAN	N	0.213762	3.40269	1	2.29554	0.401836	6.43303	3.32204	11.616	7.33878	1	6
514729	P11215	Integrin alpha-M precursor (Cell surface glycoprotein MAC-1 alpha subunit) (CR-3 alpha chain) (Leukocyte adhesion receptor MO1) (Neutrophil adherence receptor) (CD11b antigen) - Homo sapiens (Human)	ITAM_HUMAN	Y	0.246336	0.0745696	17.7878	4.56557	0.856456	10.7154	14.3605	2.19438	1	6.00791	6
519893	Q9UPN7	SAPS domain family member 1 - Homo sapiens (Human)	SAPS1_HUMAN	N	0.469641	1	4.89129	3.90233	2.85044	4.38395	9.23024	2.89806	0.209155	0.220283	6
516687	Q92614	Myosin-18A (Myosin XVIIIa) (Myosin containing PDZ domain) (Molecule associated with JAK3 N-terminus) (MAJN) - Homo sapiens (Human)	MY18A_HUMAN	N	0.855815	3.40269	1.57558	4.83766	2.35727	6.43303	1.24114	0.341429	4.1993	3.35407	6
512886	P02765	Alpha-2-HS-glycoprotein precursor (Fetuin-A) (Alpha-2-Z-globulin) (Ba-alpha-2-glycoprotein) [Contains: Alpha-2-HS-glycoprotein chain A; Alpha-2-HS-glycoprotein chain B] - Homo sapiens (Human)	FETUA_HUMAN	N	0.00274577	3.67002	5.0959	1.05735	3.11572	0.758144	0.936651	4.68663	2.06187	1.33936	5
515218	Q53HC5	Kelch-like protein 26 - Homo sapiens (Human)	KLH26_HUMAN	N	0.0108219	6.80538	1	1	3.62555	1	3.02769	4.78274	1	3.79672	5
510405	P00450	Ceruloplasmin precursor (EC 1.16.3.1) (Ferroxidase) - Homo sapiens (Human)	CERU_HUMAN	N	0.0113714	1.15923	2.89551	2.13925	0.996422	4.39026	2.26081	0.857388	2.03896	1.18389	5
522696	Q9H4A3	Serine/threonine-protein kinase WNK1 (EC 2.7.11.1) (Protein kinase with no lysine 1) (Protein kinase, lysine-deficient 1) (Kinase deficient protein) - Homo sapiens (Human)	WNK1_HUMAN	N	0.011435	1.3785	9.78258	5.28975	1.30791	4.3125	0.678187	4.10105	3.66939	1	5
519078	Q96PU8	Quaking protein (Hqk) - Homo sapiens (Human)	QKI_HUMAN	N	0.0137057	1	4.89129	1.71671	1.45485	4.3125	6.05538	9.22464	1	3.79672	5
521031	O43752	Syntaxin-6 - Homo sapiens (Human)	STX6_HUMAN	Y	0.0157009	1	1.90858	3.99672	1.21345	4.38395	9.08306	4.10105	3.66939	1	5
519310	P42331	Rho-GTPase-activating protein 25 - Homo sapiens (Human)	RHG25_HUMAN	N	0.0232347	1	5.40817	23.9215	1.54072	15.2724	3.32204	17.7676	1	0.881132	5
516758	Q8TDX7	Serine/threonine-protein kinase Nek7 (EC 2.7.11.1) (NimA-related protein kinase 7) - Homo sapiens (Human)	NEK7_HUMAN	N	0.0259944	1	1	5.28975	3.62555	10.817	3.02769	1	3.66939	1	5
518517	Q15126	Phosphomevalonate kinase (EC 2.7.4.2) (PMKase) - Homo sapiens (Human)	PMVK_HUMAN	N	0.0263813	1.63084	5.92505	1.53847	1.55925	4.24106	4.83569	4.4419	7.60373	0.475635	5
517946	P05120	Plasminogen activator inhibitor 2 precursor (PAI-2) (Placental plasminogen activator inhibitor) (Monocyte Arg-serpin) (Urokinase inhibitor) - Homo sapiens (Human)	PAI2_HUMAN	N	0.0336571	1	1	3.99672	12.1787	8.48212	1	6.49242	23.0761	1	5
514599	Q14116	Interleukin-18 precursor (IL-18) (Interferon-gamma-inducing factor) (IFN-gamma-inducing factor) (Interleukin-1 gamma) (IL-1 gamma) (Iboctadekin) - Homo sapiens (Human)	IL18_HUMAN	N	0.0351757	3.40269	4.89129	0.900292	6.74038	6.43303	0.886795	1	1.62644	10.5504	5
515779	O60711	Leupaxin - Homo sapiens (Human)	LPXN_HUMAN	N	0.0359605	1	7.85382	6.6416	3.37019	17.25	1	4.65853	1	1	5
514246	P01766	Ig heavy chain V-III region BRO - Homo sapiens (Human)	HV3E_HUMAN	N	0.0394681	1.47918	4.44817	1.40151	3.11483	3.36962	1.66078	2.51227	0.140963	4.33984	5
518620	P29350	Tyrosine-protein phosphatase non-receptor type 6 (EC 3.1.3.48) (Protein-tyrosine phosphatase 1C) (PTP-1C) (Hematopoietic cell protein-tyrosine phosphatase) (SH-PTP1) (Protein-tyrosine phosphatase SHP-1) - Homo sapiens (Human)	PTN6_HUMAN	N	0.0398015	2.65796	1.54228	5.87367	2.66695	6.20779	1.54184	6.45207	0.743612	1.98161	5
512221	O14531	Dihydropyrimidinase-related protein 4 (DRP-4) (Collapsin response mediator protein 3) (CRMP-3) (UNC33-like phosphoprotein 4) (ULIP4 protein) - Homo sapiens (Human)	DPYL4_HUMAN	N	0.039886	1	1	3.99672	3.62555	4.24106	3.02769	0.296981	3.93434	1	5
516692	Q96SB3	Neurabin-2 (Neurabin-II) (Spinophilin) (Protein phosphatase 1 regulatory subunit 9B) - Homo sapiens (Human)	NEB2_HUMAN	N	0.0401081	1	0.296512	7.99345	8.2978	4.38395	3.02769	1	1	3.51679	5
513108	P14207	Folate receptor beta precursor (FR-beta) (Folate receptor 2) (Folate receptor, fetal/placental) (Placental folate-binding protein) (FBP) - Homo sapiens (Human)	FOLR2_HUMAN	N	0.0412028	0.377845	17.6364	0.774938	1.04963	6.80426	4.83588	15.7171	2.06898	1.03977	5
512010	P51808	Dynein light chain Tctex-type 3 (T-complex-associated testis-expressed 1-like) (Protein 91/23) - Homo sapiens (Human)	DYLT3_HUMAN	N	0.0414322	3.40269	1	3.99672	3.11483	4.3125	1	0.296981	3.66939	1	5
512904	P04066	Tissue alpha-L-fucosidase precursor (EC 3.2.1.51) (Alpha-L-fucosidase I) (Alpha-L-fucoside fucohydrolase) - Homo sapiens (Human)	FUCO_HUMAN	N	0.0414852	0.369796	14.3813	1.35044	0.594972	4.61927	2.91422	10.0416	2.1972	1.93166	5
518899	P20339	Ras-related protein Rab-5A - Homo sapiens (Human)	RAB5A_HUMAN	N	0.0490194	1	19.5652	0.741734	2.96718	2.51626	0.538289	13.3257	3.10348	1.15764	5
513066	P02751	Fibronectin precursor (FN) (Cold-insoluble globulin) (CIG) - Homo sapiens (Human)	FINC_HUMAN	N	0.049138	14.3085	9.96535	1.56012	1.63986	0.155635	5.22249	12.2268	0.17708	17.9359	5
514710	P20701	Integrin alpha-L precursor (Leukocyte adhesion glycoprotein LFA-1 alpha chain) (LFA-1A) (Leukocyte function-associated molecule 1 alpha chain) (CD11a antigen) - Homo sapiens (Human)	ITAL_HUMAN	Y	0.0498615	1	19.5652	23.9803	0.62754	17.25	1.41641	2.69152	1	7.03359	5
508463	P28067	HLA class II histocompatibility antigen, DM alpha chain precursor (MHC class II antigen DMA) - Homo sapiens (Human)	2DMA_HUMAN	Y	0.0499664	0.2376	24.0783	1.80704	0.645788	5.99452	4.83588	6.83327	1	3.79787	5
509100	P56377	AP-1 complex subunit sigma-2 (Adapter-related protein complex 1 sigma-1B subunit) (Sigma-adaptin 1B) (Adaptor protein complex AP-1 sigma-1B subunit) (Golgi adaptor HA1/AP1 adaptin sigma-1B subunit) (Clathrin assembly protein complex 1	AP1S2_HUMAN	N	0.0514923	0.2376	3.15117	11.9902	2.6836	4.38395	1	4.10105	1	1.76226	5
518361	P55058	Phospholipid transfer protein precursor (Lipid transfer protein II) - Homo sapiens (Human)	PLTP_HUMAN	N	0.0547643	1	9.00847	1.54988	1.20751	32.5938	14.2133	3.08508	0.526001	3.51679	5
511232	P31146	Coronin-1A (Coronin-like protein p57) (Coronin-like protein A) (Clipin-A) (Tryptophan aspartate-containing coat protein) (TACO) - Homo sapiens (Human)	COR1A_HUMAN	N	0.0558502	1.54814	8.92684	2.85821	1.16033	3.49793	2.19895	2.25581	1.36993	1.83228	5
509696	P27037	Activin receptor type 2A precursor (EC 2.7.11.30) (Activin receptor type IIA) (ACTR-IIA) (ACTRIIA) - Homo sapiens (Human)	AVR2A_HUMAN	Y	0.0564854	10.2081	3.78471	3.07694	0.419081	8.69645	0.490593	1.55231	1.03124	2.02908	5
509565	Q9UBW5	Bridging integrator 2 (Breast cancer-associated protein 1) - Homo sapiens (Human)	BIN2_HUMAN	N	0.0565976	1	3.31766	26.5664	2.88064	19.3705	0.253853	3.38287	1	0.25055	5
516038	P23368	NAD-dependent malic enzyme, mitochondrial precursor (EC 1.1.1.38) (NAD-ME) (Malic enzyme 2) - Homo sapiens (Human)	MAOM_HUMAN	N	0.059397	1.40592	8.36548	0.623116	0.787346	3.82177	3.75517	5.4678	1.94049	2.07979	5
518359	P13796	Plastin-2 (L-plastin) (Lymphocyte cytosolic protein 1) (LCP-1) (LC64P) - Homo sapiens (Human)	PLSL_HUMAN	N	0.0608174	1.28729	10.2791	2.20485	1.28549	9.58592	2.03603	3.8882	0.494481	1.34441	5
512427	Q96JJ3	Engulfment and cell motility protein 2 (CED-12 homolog A) (hCED-12A) - Homo sapiens (Human)	ELMO2_HUMAN	N	0.0611424	1	5.40817	1	2.20244	0.842405	3.02769	4.78274	3.66939	0.951269	5
515811	P07948	Tyrosine-protein kinase Lyn (EC 2.7.10.2) - Homo sapiens (Human)	LYN_HUMAN	N	0.0633141	13.6108	5.37784	2.18799	1.24595	34.5	1.93287	1.87145	0.649775	7.31352	5
511582	P41240	Tyrosine-protein kinase CSK (EC 2.7.10.2) (C-SRC kinase) (Protein-tyrosine kinase CYL) - Homo sapiens (Human)	CSK_HUMAN	N	0.0660515	1	1.92575	9.09181	2.88333	38.7411	4.83588	0.37797	1	4.40566	5
512118	Q9Y2J2	Band 4.1-like protein 3 (4.1B) (Differentially expressed in adenocarcinoma of the lung protein 1) (DAL-1) - Homo sapiens (Human)	E41L3_HUMAN	N	0.0676609	1	15.5122	2.66961	1.34333	1.91714	2.41784	4.65853	0.358189	2.12084	5
518337	O15162	Phospholipid scramblase 1 (PL scramblase 1) (Ca(2+)-dependent phospholipid scramblase 1) (Erythrocyte phospholipid scramblase) (MmTRA1b) - Homo sapiens (Human)	PLS1_HUMAN	N	0.0688871	3.14973	7.85382	1.77006	0.809606	5.13816	0.928082	2.43002	3.93434	0.854879	5
520546	O75995	SH3 protein expressed in lymphocytes homolog - Homo sapiens (Human)	SLY_HUMAN	N	0.0701025	1	4.89129	21.2178	1.0481	10.817	3.02769	4.4419	1	1	5
517277	P10451	Osteopontin precursor (Bone sialoprotein-1) (Secreted phosphoprotein 1) (SPP-1) (Urinary stone protein) (Nephropontin) (Uropontin) - Homo sapiens (Human)	OSTP_HUMAN	N	0.0708141	3.40269	0.787791	3.99672	0.868289	0.19534	9.96612	3.58298	1	14.0672	5
518358	Q14651	Plastin-1 (I-plastin) (Intestine-specific plastin) - Homo sapiens (Human)	PLSI_HUMAN	N	0.0742595	2.12639	3.45717	3.28903	1.45319	7.76571	1.63001	2.01525	0.485074	1.00415	5
511884	Q16832	Discoidin domain-containing receptor 2 precursor (EC 2.7.10.1) (Discoidin domain receptor 2) (Receptor protein-tyrosine kinase TKT) (Tyrosine-protein kinase TYRO 10) (Neurotrophic tyrosine kinase, receptor-related 3) (CD167b antigen) -	DDR2_HUMAN	Y	0.0749873	0.772503	5.92505	1	0.265425	1	3.17486	4.78274	3.66939	3.51679	5
522506	P42768	Wiskott-Aldrich syndrome protein (WASp) - Homo sapiens (Human)	WASP_HUMAN	N	0.0781426	1	1	8.63996	3.92373	4.24106	6.05538	0.291225	1	3.51679	5
508950	Q8N8A2	Ankyrin repeat domain-containing protein 44 - Homo sapiens (Human)	ANR44_HUMAN	N	0.0783983	1	1	26.5664	12.97	4.3125	3.02769	0.964064	3.66939	1	5
510618	Q96P48	Centaurin-delta 2 (Cnt-d2) (Arf-GAP, Rho-GAP, ankyrin repeat and pleckstrin homology domain-containing protein 1) - Homo sapiens (Human)	CEND2_HUMAN	N	0.0809732	0.755689	9.78258	3.99672	3.0292	4.3125	1	4.26116	1	1	5
516349	P22897	Macrophage mannose receptor 1 precursor (MMR) (CD206 antigen) - Homo sapiens (Human)	MRC1_HUMAN	Y	0.0828303	3.40269	76.9875	10.4446	0.251242	34.4286	1	94.9895	1	1	5
509594	Q13490	Baculoviral IAP repeat-containing protein 2 (Inhibitor of apoptosis protein 2) (HIAP2) (HIAP-2) (C-IAP1) (TNFR2-TRAF signaling complex protein 2) (IAP homolog B) - Homo sapiens (Human)	BIRC2_HUMAN	N	0.0837489	1	7.85382	5.28975	1	0.146	11.3328	4.78274	1	3.51679	5
516174	P52888	Thimet oligopeptidase (EC 3.4.24.15) (Endopeptidase 24.15) (MP78) - Homo sapiens (Human)	MEPD_HUMAN	N	0.0855219	1.70341	4.89129	1	3.62555	4.3125	2.7466	0.291225	2.56749	0.831919	5
514193	P00739	Haptoglobin-related protein precursor - Homo sapiens (Human)	HPTR_HUMAN	N	0.0965833	4.57531	6.82491	0.589519	0.999667	3.0309	1.46125	3.27793	0.0362547	2.0943	5
513606	Q9Y2X7	ARF GTPase-activating protein GIT1 (G protein-coupled receptor kinase-interactor 1) (GRK-interacting protein 1) (Cool-associated and tyrosine-phosphorylated protein 1) (Cat-1) - Homo sapiens (Human)	GIT1_HUMAN	N	0.096716	1	0.296512	11.9902	2.20244	8.48212	1.3733	0.493021	3.66939	3.65676	5
515292	P38571	Lysosomal acid lipase/cholesteryl ester hydrolase precursor (EC 3.1.1.13) (LAL) (Acid cholesteryl ester hydrolase) (Sterol esterase) (Lipase A) (Cholesteryl esterase) - Homo sapiens (Human)	LICH_HUMAN	N	0.0968849	1	32.9659	0.620289	0.827477	29.9732	3.02769	4.96916	0.324888	3.51679	5
511611	P13498	Cytochrome b-245 light chain (p22 phagocyte B-cytochrome) (Neutrophil cytochrome b 22 kDa polypeptide) (p22-phox) (p22phox) (Cytochrome b(558) alpha chain) (Cytochrome b558 subunit alpha) (Superoxide-generating NADPH oxidase light chai	CY24A_HUMAN	Y	0.0975088	3.40269	14.2957	2.4192	0.386381	10.8884	8.01075	1.31916	1	1.86747	5
516603	P21757	Macrophage scavenger receptor types I and II (Macrophage acetylated LDL receptor I and II) (Scavenger receptor class A member 1) (CD204 antigen) - Homo sapiens (Human)	MSRE_HUMAN	Y	0.0977196	0.217355	28.9696	0.197501	1.31263	51.4643	3.17486	14.612	1	2.6434	5
517310	P29728	2'-5'-oligoadenylate synthetase 2 (EC 2.7.7.-) ((2-5')oligo(A) synthetase 2) (2-5A synthetase 2) (p69 OAS / p71 OAS) (p69OAS / p71OAS) - Homo sapiens (Human)	OAS2_HUMAN	N	0.100043	6.80538	17.7751	0.828956	1.67632	1.33795	3.17486	2.91089	1	3.79672	5
516925	P19878	Neutrophil cytosol factor 2 (NCF-2) (Neutrophil NADPH oxidase factor 2) (67 kDa neutrophil oxidase factor) (p67-phox) (NOXA2) - Homo sapiens (Human)	NCF2_HUMAN	N	0.102918	1	1	8.11648	1.76647	12.9375	6.05538	4.10105	1	3.51679	5
520436	P35237	Serpin B6 (Placental thrombin inhibitor) (Cytoplasmic antiproteinase) (CAP) (Protease inhibitor 6) (PI-6) - Homo sapiens (Human)	SPB6_HUMAN	N	0.10688	2.22831	0.203055	2.3516	1.52068	3.70775	1.24781	7.08219	2.6244	0.873155	5
515842	Q8N386	Leucine-rich repeat-containing protein 25 precursor (Monocyte and plasmacytoid-activated protein) - Homo sapiens (Human)	LRC25_HUMAN	Y	0.107061	1	5.40817	0.626897	1.60609	15.1295	3.32204	14.3482	1	3.79672	5
515471	O00182	Galectin-9 (HOM-HD-21) (Ecalectin) - Homo sapiens (Human)	LEG9_HUMAN	N	0.108428	2.24806	36.3725	2.63149	0.805295	4.86728	1.87427	1.38177	1	2.40756	5
508859	P43353	Aldehyde dehydrogenase 3B1 (EC 1.2.1.5) (Aldehyde dehydrogenase 7) - Homo sapiens (Human)	AL3B1_HUMAN	N	0.109661	1	7.85382	46.4323	1.30791	1.71272	3.02769	3.34851	3.66939	1	5
514009	P14317	Hematopoietic lineage cell-specific protein (Hematopoietic cell-specific LYN substrate 1) (LckBP1) (p75) - Homo sapiens (Human)	HCLS1_HUMAN	N	0.113271	1.89653	5.14808	5.31171	1.40267	55.9911	4.33931	4.24502	1	1.14354	5
522204	Q96JJ7	Protein disulfide-isomerase TXNDC10 precursor (EC 5.3.4.1) (Thioredoxin domain-containing protein 10) (Thioredoxin-related transmembrane protein 3) - Homo sapiens (Human)	TXD10_HUMAN	Y	0.115713	1	2.90065	0.6931	2.0769	8.48212	4.68871	0.30297	0.813218	2.37308	5
513109	P41439	Folate receptor gamma precursor (FR-gamma) (Folate receptor 3) - Homo sapiens (Human)	FOLR3_HUMAN	N	0.119012	1	10.2995	0.774938	1.47602	4.32382	3.17486	3.31277	1	3.79672	5
508518	P01023	Alpha-2-macroglobulin precursor (Alpha-2-M) - Homo sapiens (Human)	A2MG_HUMAN	N	0.121083	0.390903	27.9257	0.962039	1.04662	2.32679	2.83897	4.39369	0.751321	4.62022	5
513126	Q13451	FK506-binding protein 5 (EC 5.2.1.8) (Peptidyl-prolyl cis-trans isomerase) (PPIase) (Rotamase) (51 kDa FK506-binding protein) (FKBP-51) (54 kDa progesterone receptor-associated immunophilin) (FKBP54) (P54) (FF1 antigen) (HSP90-binding	FKBP5_HUMAN	N	0.123707	2.21878	2.829	2.06343	1.26557	36.6206	3.25466	1.69597	0.217528	1.81487	5
520595	Q9Y5X2	Sorting nexin-8 - Homo sapiens (Human)	SNX8_HUMAN	N	0.125797	1	0.274675	3.99672	3.11483	6.50448	1	4.78274	3.93434	0.25055	5
520722	Q8TE77	Protein phosphatase Slingshot homolog 3 (EC 3.1.3.48) (EC 3.1.3.16) (SSH-3L) (hSSH-3L) - Homo sapiens (Human)	SSH3_HUMAN	N	0.128363	3.40269	1	3.99672	3.62555	0.146	6.05538	6.49242	1.03449	0.881132	5
518213	P36955	Pigment epithelium-derived factor precursor (PEDF) (Serpin-F1) (EPC-1) - Homo sapiens (Human)	PEDF_HUMAN	N	0.128438	1	5.56757	3.99672	0.779626	6.50448	3.02769	1.19433	1	7.31352	5
516714	Q9NVZ3	Adaptin ear-binding coat-associated protein 2 (NECAP-2) - Homo sapiens (Human)	NECP2_HUMAN	N	0.133254	0.217355	9.78258	0.965821	8.04243	1.67783	3.02769	2.48499	1	3.51679	5
512494	Q9BUP0	EF-hand domain-containing protein 1 (Swiprosin-2) - Homo sapiens (Human)	EFHD1_HUMAN	N	0.133508	1.21272	0.296512	4.63252	1.89226	4.38395	0.677943	3.93402	8.13364	3.79672	5
519118	P11234	Ras-related protein Ral-B - Homo sapiens (Human)	RALB_HUMAN	N	0.149823	1.00032	1.98641	3.71112	0.610798	19.2991	0.249924	3.40523	5.54595	7.17355	5
520826	O94804	Serine/threonine-protein kinase 10 (EC 2.7.11.1) (Lymphocyte-oriented kinase) - Homo sapiens (Human)	STK10_HUMAN	N	0.150873	1.0429	2.52987	3.70781	2.01589	15.058	1.27523	6.66648	0.281925	0.125275	5
512704	P09467	Fructose-1,6-bisphosphatase 1 (EC 3.1.3.11) (D-fructose-1,6-bisphosphate 1-phosphohydrolase 1) (FBPase 1) - Homo sapiens (Human)	F16P1_HUMAN	N	0.150967	3.1325	2.31244	3.33855	1.12622	20.4296	15.7271	1.35804	1	1.16585	5
512121	Q92608	Dedicator of cytokinesis protein 2 - Homo sapiens (Human)	DOCK2_HUMAN	N	0.152825	0.217355	5.40817	5.20876	0.604735	6.59542	2.91903	26.6514	1	0.916201	5
515074	P17252	Protein kinase C alpha type (EC 2.7.11.13) (PKC-alpha) (PKC-A) - Homo sapiens (Human)	KPCA_HUMAN	N	0.159899	0.257779	10.8163	2.0793	2.33888	10.8884	1	4.7618	1	0.916201	5
513204	P13284	Gamma-interferon-inducible lysosomal thiol reductase precursor (Gamma-interferon-inducible protein IP-30) - Homo sapiens (Human)	GILT_HUMAN	N	0.16011	1.20465	6.23988	0.821778	0.63519	10.04	2.68862	4.41092	0.240801	2.03625	5
514750	P05107	Integrin beta-2 precursor (Cell surface adhesion glycoproteins LFA-1/CR3/p150,95 subunit beta) (Complement receptor C3 subunit beta) (CD18 antigen) - Homo sapiens (Human)	ITB2_HUMAN	Y	0.160976	1.41269	20.239	2.34673	0.979405	12.252	2.64967	1.79249	1	2.44954	5
508517	P02750	Leucine-rich alpha-2-glycoprotein precursor (LRG) - Homo sapiens (Human)	A2GL_HUMAN	N	0.161528	0.217355	3.08456	2.30353	0.907458	4.24106	3.17486	1.36188	0.281925	7.31352	5
508415	Q9Y3L3	SH3 domain-binding protein 1 (3BP-1) - Homo sapiens (Human)	3BP1_HUMAN	N	0.165403	0.772503	0.525194	3.86328	2.26941	4.3125	3.02769	1.39285	1	3.51679	5
512090	O75923	Dysferlin (Dystrophy-associated fer-1-like protein) (Fer-1-like protein 1) - Homo sapiens (Human)	DYSF_HUMAN	Y	0.165685	0.0724517	38.7522	2.66961	0.773507	7.16044	3.60809	8.09702	1.18389	0.440566	5
511612	P04839	Cytochrome b-245 heavy chain (p22 phagocyte B-cytochrome) (Neutrophil cytochrome b 91 kDa polypeptide) (CGD91-phox) (gp91-phox) (gp91-1) (Heme-binding membrane glycoprotein gp91phox) (Cytochrome b(558) subunit beta) (Cytochrome b558 su	CY24B_HUMAN	Y	0.17405	0.416583	43.0411	2.19589	0.93676	4.63896	4.52432	1.95399	0.17708	3.52369	5
512200	Q14194	Dihydropyrimidinase-related protein 1 (DRP-1) (Collapsin response mediator protein 1) (CRMP-1) - Homo sapiens (Human)	DPYL1_HUMAN	N	0.181802	5.04416	4.89129	1.50353	1.3418	3.03683	2.03355	0.440233	2.64366	0.582924	5
510027	P08575	Leukocyte common antigen precursor (EC 3.1.3.48) (L-CA) (CD45 antigen) (T200) - Homo sapiens (Human)	CD45_HUMAN	Y	0.18377	1.94851	120.77	3.16629	0.874638	15.7302	1.0574	2.11311	1	5.4972	5
513049	P02675	Fibrinogen beta chain precursor [Contains: Fibrinopeptide B] - Homo sapiens (Human)	FIBB_HUMAN	N	0.194112	88.5491	7.63802	0.915883	1.50933	0.158434	23.9327	11.9958	1.37748	5.63107	5
512721	O00757	Fructose-1,6-bisphosphatase isozyme 2 (EC 3.1.3.11) (D-fructose-1,6-bisphosphate 1-phosphohydrolase 2) (FBPase 2) - Homo sapiens (Human)	F16P2_HUMAN	N	0.19799	0.851703	2.48201	3.91907	0.742893	9.68067	3.17486	2.2549	1	0.951269	5
514846	Q14571	Inositol 1,4,5-trisphosphate receptor type 2 (Type 2 inositol 1,4,5-trisphosphate receptor) (Type 2 InsP3 receptor) (IP3 receptor isoform 2) (InsP3R2) - Homo sapiens (Human)	ITPR2_HUMAN	Y	0.203544	1	1.45032	5.28975	1.13579	4.24106	0.588348	2.07028	3.66939	3.79672	5
515948	Q9H8H3	Methyltransferase-like protein 7A precursor (EC 2.1.1.-) (Protein AAM-B) - Homo sapiens (Human)	MET7A_HUMAN	Y	0.204452	6.80538	13.7701	1.67974	0.665619	0.720637	25.3989	3.2464	1	7.31352	5
520629	Q9NY15	Stabilin-1 precursor (FEEL-1 protein) (MS-1 antigen) - Homo sapiens (Human)	STAB1_HUMAN	Y	0.205296	1	168.548	2.62851	0.622207	126.826	0.886795	20.9968	1	3.79672	5
515453	P01620	Ig kappa chain V-III region SIE - Homo sapiens (Human)	KV3B_HUMAN	N	0.205468	4.79812	6.77692	0.728304	3.62555	6.43303	0.711154	1.31053	1	3.79672	5
514086	P52790	Hexokinase-3 (EC 2.7.1.1) (Hexokinase type III) (HK III) - Homo sapiens (Human)	HXK3_HUMAN	N	0.207001	3.02056	4.81075	8.18707	1.58259	218.031	0.700165	2.27343	0.281925	0.881132	5
513504	O14653	Golgi SNAP receptor complex member 2 (27 kDa Golgi SNARE protein) (Membrin) - Homo sapiens (Human)	GOSR2_HUMAN	N	0.208263	0.108677	1.20311	6.6416	0.962312	4.24106	4.68871	4.10105	3.66939	0.951269	5
521361	P24557	Thromboxane-A synthase (EC 5.3.99.5) (TXA synthase) (TXS) (Cytochrome P450 5A1) - Homo sapiens (Human)	THAS_HUMAN	N	0.214015	1.21272	11.3364	1.49578	0.679059	6.48573	6.20255	4.48699	1	2.32638	5
511290	Q6UXH1	Cysteine-rich with EGF-like domain protein 2 precursor - Homo sapiens (Human)	CREL2_HUMAN	N	0.215464	1	2.26554	3.48722	0.250295	4.38395	6.34973	2.43587	1	0.440566	5
519988	Q13228	Selenium-binding protein 1 - Homo sapiens (Human)	SBP1_HUMAN	N	0.219382	0.948657	10.1934	1	1.65351	2.46594	3.17486	7.45497	2.43338	1.63433	5
515456	P01623	Ig kappa chain V-III region WOL - Homo sapiens (Human)	KV3E_HUMAN	N	0.227952	4.79812	5.24997	0.728304	3.62555	4.3125	0.711154	1.07534	1	3.79672	5
513376	Q9BQS8	FYVE and coiled-coil domain-containing protein 1 (Zinc finger FYVE domain-containing protein 7) - Homo sapiens (Human)	FYCO1_HUMAN	N	0.230464	1	0.16106	3.99672	3.11483	1	9.23024	0.30297	3.66939	6.16793	5
514257	P01777	Ig heavy chain V-III region TEI - Homo sapiens (Human)	HV3P_HUMAN	N	0.239014	0.217355	4.27195	2.61397	1	4.24106	3.02769	0.296981	0.281925	7.59345	5
515455	P01622	Ig kappa chain V-III region Ti - Homo sapiens (Human)	KV3D_HUMAN	N	0.240622	4.79812	6.14921	0.498602	3.62555	4.24106	0.711154	1.05117	1	3.79672	5
515458	P04206	Ig kappa chain V-III region GOL (Rheumatoid factor) - Homo sapiens (Human)	KV3G_HUMAN	N	0.260776	4.79812	4.00896	0.498602	3.62555	4.24106	0.711154	1.05117	1	3.79672	5
521608	O60784	Target of Myb protein 1 - Homo sapiens (Human)	TOM1_HUMAN	N	0.264284	2.47591	3.93233	1.39412	0.990946	27.9241	0.501772	2.19737	1.0685	2.25126	5
514798	P19827	Inter-alpha-trypsin inhibitor heavy chain H1 precursor (ITI heavy chain H1) (Inter-alpha-inhibitor heavy chain 1) (Inter-alpha-trypsin inhibitor complex component III) (Serum-derived hyaluronan-associated protein) (SHAP) - Homo sapiens	ITIH1_HUMAN	Y	0.269663	1	48.9129	10.6383	0.132712	0.531736	3.17486	2.02935	1	5.41515	5
510156	P07711	Cathepsin L precursor (EC 3.4.22.15) (Major excreted protein) (MEP) [Contains: Cathepsin L heavy chain; Cathepsin L light chain] - Homo sapiens (Human)	CATL_HUMAN	N	0.274208	3.40269	3.78471	0.525553	1.26954	43.1965	1.41641	3.88077	1	3.79672	5
508490	P04217	Alpha-1B-glycoprotein precursor (Alpha-1-B glycoprotein) - Homo sapiens (Human)	A1BG_HUMAN	N	0.277126	2.11429	6.13399	1.16765	0.562406	4.15261	2.04433	0.8772	0.0219085	5.81682	5
508752	Q13443	ADAM 9 precursor (EC 3.4.24.-) (A disintegrin and metalloproteinase domain 9) (Metalloprotease/disintegrin/cysteine-rich protein 9) (Myeloma cell metalloproteinase) (Meltrin gamma) (Cellular disintegrin-related protein) - Homo sapiens	ADAM9_HUMAN	Y	0.283973	1	2.68703	1	2.53063	4.3125	9.67177	1	0.093975	3.79672	5
509399	O95671	N-acetylserotonin O-methyltransferase-like protein (ASMTL) - Homo sapiens (Human)	ASML_HUMAN	N	0.310443	2.06132	1	4.64323	0.389813	4.3125	2.38941	1.29359	3.66939	1	5
510795	P02748	Complement component C9 precursor [Contains: Complement component C9a; Complement component C9b] - Homo sapiens (Human)	CO9_HUMAN	N	0.317317	3.40269	25.0463	0.443658	0.426966	0.794852	6.23834	2.11833	1	8.6513	5
521607	Q9H0E2	Toll-interacting protein - Homo sapiens (Human)	TOLIP_HUMAN	N	0.318507	1	0.08053	2.96252	2.20362	6.50448	6.20255	8.88379	1	0.560612	5
508871	P00352	Retinal dehydrogenase 1 (EC 1.2.1.36) (RalDH1) (RALDH 1) (Aldehyde dehydrogenase family 1 member A1) (Aldehyde dehydrogenase, cytosolic) (ALHDII) (ALDH-E1) - Homo sapiens (Human)	AL1A1_HUMAN	N	0.31869	1	15.3457	0.173417	0.75974	6.5062	63.6444	24.26	1	3.65676	5
512483	P13727	Eosinophil granule major basic protein precursor (MBP) (EMBP) (Pregnancy-associated major basic protein) (Proteoglycan 2, bone marrow) (BMPG) - Homo sapiens (Human)	EMBP_HUMAN	N	0.320151	0.227027	30.0034	265.011	0.641259	0.19534	0.733295	14.3482	3.66939	5.55512	5
511287	O75629	Protein CREG1 precursor (Cellular repressor of E1A-stimulated genes 1) - Homo sapiens (Human)	CREG1_HUMAN	Y	0.330561	4.79812	4.03055	0.493579	0.902469	12.9125	6.05538	3.5193	1	0.15941	5
515424	P01612	Ig kappa chain V-I region Mev - Homo sapiens (Human)	KV1T_HUMAN	N	0.335973	4.79812	2.27766	3.99672	3.37019	0.19534	1	0.710193	1	2.56464	5
509042	P01019	Angiotensinogen precursor [Contains: Angiotensin-1 (Angiotensin I) (Ang I); Angiotensin-2 (Angiotensin II) (Ang II); Angiotensin-3 (Angiotensin III) (Ang III) (Des-Asp[1]-angiotensin II)] - Homo sapiens (Human)	ANGT_HUMAN	N	0.33806	1	33.8609	2.30842	2.40749	8.48212	0.47734	0.316336	0.0688953	2.52832	5
518402	P11117	Lysosomal acid phosphatase precursor (EC 3.1.3.2) (LAP) - Homo sapiens (Human)	PPAL_HUMAN	Y	0.344482	0.149139	1.75038	0.215838	0.626235	62.4956	3.17486	17.7676	4.1993	3.51679	5
509052	P06727	Apolipoprotein A-IV precursor (Apo-AIV) (ApoA-IV) - Homo sapiens (Human)	APOA4_HUMAN	N	0.392825	1	5.68547	0.749158	1	8.48212	3.17486	4.4419	0.0576756	12.7287	5
519892	P17900	Ganglioside GM2 activator precursor (GM2-AP) (Cerebroside sulfate activator protein) (Shingolipid activator protein 3) (SAP-3) [Contains: Ganglioside GM2 activator isoform short] - Homo sapiens (Human)	SAP3_HUMAN	N	0.407646	0.689248	3.11132	0.346987	1.19543	3.04519	9.08306	2.78571	5.76904	0.346591	5
519801	Q04323	SAPK substrate protein 1 (UBA/UBX 33.3 kDa protein) - Homo sapiens (Human)	SAKS1_HUMAN	N	0.411408	0.2376	0.296512	7.99345	2.0769	4.38395	3.32204	0.621248	5.76904	0.425312	5
509463	P80723	Brain acid soluble protein 1 (BASP1 protein) (Neuronal axonal membrane protein NAP-22) (22 kDa neuronal tissue-enriched acidic protein) - Homo sapiens (Human)	BASP_HUMAN	N	0.419231	0.833943	3.15543	3.35743	2.31696	30.1875	1.24715	2.93254	1	0.764344	5
509955	Q5VTR2	Ubiquitin-protein ligase BRE1A (EC 6.3.2.-) (BRE1-A) (hBRE1) (RING finger protein 20) - Homo sapiens (Human)	BRE1A_HUMAN	N	0.42115	5.80175	0.32212	3.99672	3.62555	4.38395	3.17486	1.21794	0.140963	0.57882	5
519021	P11217	Glycogen phosphorylase, muscle form (EC 2.4.1.1) (Myophosphorylase) - Homo sapiens (Human)	PYGM_HUMAN	N	0.430559	9.23441	0.0214487	2.36568	3.07191	0.825295	2.54644	5.17456	0.423969	0.252963	5
512002	Q9UKG1	DCC-interacting protein 13 alpha (Dip13 alpha) (Adapter protein containing PH domain, PTB domain and leucine zipper motif 1) - Homo sapiens (Human)	DP13A_HUMAN	N	0.451635	3.40269	1	11.9902	0.265425	4.24106	3.32204	0.500799	7.33878	1	5
508743	Q99541	Adipophilin (Adipose differentiation-related protein) (ADRP) - Homo sapiens (Human)	ADFP_HUMAN	N	0.480807	6.80538	0.786416	0.41936	0.470764	3.27666	28.7838	6.58239	1	3.51679	5
510481	P17676	CCAAT/enhancer-binding protein beta (C/EBP beta) (Nuclear factor NF-IL6) (Transcription factor 5) - Homo sapiens (Human)	CEBPB_HUMAN	N	0.487334	0.739592	4.89129	1	0.907458	4.38395	3.02769	4.10105	3.66939	0.405737	5
512223	P33316	Deoxyuridine 5'-triphosphate nucleotidohydrolase, mitochondrial precursor (EC 3.6.1.23) (dUTPase) (dUTP pyrophosphatase) - Homo sapiens (Human)	DUT_HUMAN	N	0.491946	3.40269	0.231715	2.2721	6.22966	0.146	0.146448	0.285205	3.66939	5.41515	5
509073	P02656	Apolipoprotein C-III precursor (Apo-CIII) (ApoC-III) - Homo sapiens (Human)	APOC3_HUMAN	N	0.527846	14.0026	4.80553	2.93547	0.52846	0.216125	5.60428	1.9712	18.3469	1.68967	5
512559	P23142	Fibulin-1 precursor - Homo sapiens (Human)	FBLN1_HUMAN	N	0.558099	1	5.77748	7.99345	1.49218	0.0299885	2.27795	2.02935	4.1993	1	5
513718	P15104	Glutamine synthetase (EC 6.3.1.2) (Glutamate--ammonia ligase) (GS) - Homo sapiens (Human)	GLNA_HUMAN	N	0.560715	6.80538	9.78258	5.31017	0.68641	27.9241	1.77359	7.24679	1	0.233781	5
510570	P05156	Complement factor I precursor (EC 3.4.21.45) (C3B/C4B inactivator) [Contains: Complement factor I heavy chain; Complement factor I light chain] - Homo sapiens (Human)	CFAI_HUMAN	N	0.616414	3.40269	1.18333	11.9902	0.779626	8.69645	2.00864	0.203878	0.217528	3.51679	5
512220	Q14195	Dihydropyrimidinase-related protein 3 (DRP-3) (Unc-33-like phosphoprotein) (ULIP protein) (Collapsin response mediator protein 4) (CRMP-4) - Homo sapiens (Human)	DPYL3_HUMAN	N	0.618822	2.45815	4.89129	0.755504	2.25208	3.98942	0.63466	0.283921	2.69458	1.07985	5
509179	P15144	Aminopeptidase N (EC 3.4.11.2) (hAPN) (Alanyl aminopeptidase) (Microsomal aminopeptidase) (Aminopeptidase M) (gp150) (Myeloid plasma membrane glycoprotein CD13) (CD13 antigen) - Homo sapiens (Human)	AMPN_HUMAN	Y	0.765273	3.40269	1	0.980058	1.87141	21.5625	3.17486	0.361348	5.89844	5.41515	5
509185	Q9Y2T2	AP-3 complex subunit mu-1 (Adapter-related protein complex 3 mu-1 subunit) (Mu-adaptin 3A) (AP-3 adapter complex mu3A subunit) - Homo sapiens (Human)	AP3M1_HUMAN	N	0.775815	1	4.89129	0.769235	2.13783	8.62501	0.443397	2.48499	0.444612	3.79672	5
510148	P48960	CD97 antigen precursor (Leukocyte antigen CD97) - Homo sapiens (Human)	CD97_HUMAN	Y	0.0103972	1.54427	1.55928	3.67793	1.45748	10.1507	1.00961	6.06105	1.70262	4.3745	4
513026	Q9NRD1	F-box only protein 6 (F-box/G-domain protein 2) - Homo sapiens (Human)	FBX6_HUMAN	N	0.0238578	1	1	3.99672	3.62555	4.24106	3.02769	1	1	1	4
522487	Q9Y6W5	Wiskott-Aldrich syndrome protein family member 2 (WASP-family protein member 2) (Protein WAVE-2) (Verprolin homology domain-containing protein 2) - Homo sapiens (Human)	WASF2_HUMAN	N	0.0240682	0.974256	4.35097	6.6416	10.1106	1.56885	1.53717	3.93402	0.36973	1.29868	4
519706	Q96EP0	RING finger protein 31 (Zinc in-between-RING-finger ubiquitin-associated domain protein) - Homo sapiens (Human)	RNF31_HUMAN	N	0.024245	3.40269	1	1	1	4.38395	3.02769	1	3.66939	1	4
521334	Q99973	Telomerase protein component 1 (Telomerase-associated protein 1) (Telomerase protein 1) (p240) (p80 telomerase homolog) - Homo sapiens (Human)	TEP1_HUMAN	N	0.0245746	1	1	3.99672	3.11483	4.24106	3.02769	1	1	1	4
516680	O95544	NAD kinase (EC 2.7.1.23) (Poly(P)/ATP NAD kinase) - Homo sapiens (Human)	NADK_HUMAN	N	0.024861	1	4.89129	3.99672	3.11483	4.24106	1	1	1	1	4
509926	Q9Y376	Calcium-binding protein 39 (Protein Mo25) - Homo sapiens (Human)	CAB39_HUMAN	N	0.0256304	1	4.89129	3.99672	10.6213	8.76789	1.38934	1.39285	1	1	4
508926	Q8N283	Ankyrin repeat domain-containing protein 35 - Homo sapiens (Human)	ANR35_HUMAN	N	0.0265664	4.79812	1	1	1	1	6.05538	1	4.1993	3.51679	4
515763	O95711	Lymphocyte antigen 86 precursor (MD-1 protein) - Homo sapiens (Human)	LY86_HUMAN	N	0.0267344	1	5.40817	3.99672	1	1	3.02769	4.10105	1	1	4
516986	P49757	Protein numb homolog (h-Numb) (Protein S171) - Homo sapiens (Human)	NUMB_HUMAN	N	0.0274914	4.79812	1	5.28975	1	1	3.02769	1	1	3.51679	4
513096	P12314	High affinity immunoglobulin gamma Fc receptor I precursor (Fc-gamma RI) (FcRI) (IgG Fc receptor I) (CD64 antigen) - Homo sapiens (Human)	FCGR1_HUMAN	Y	0.029068	1	4.89129	1	6.48502	8.62501	1	4.78274	1	1	4
511223	P17927	Complement receptor type 1 precursor (C3b/C4b receptor) (CD35 antigen) - Homo sapiens (Human)	CR1_HUMAN	Y	0.0303412	1	5.92505	6.6416	3.11483	4.38395	1	1	1	1	4
512188	O60496	Docking protein 2 (Downstream of tyrosine kinase 2) (p56(dok-2)) - Homo sapiens (Human)	DOK2_HUMAN	N	0.0330036	1	1	4.64323	4.9276	8.48212	1	9.56549	1	1	4
512761	Q9UI08	Ena/VASP-like protein (Ena/vasodilator-stimulated phosphoprotein-like) - Homo sapiens (Human)	EVL_HUMAN	N	0.0333145	1	1	3.99672	3.37019	6.43303	3.02769	1	1	1	4
514454	Q14653	Interferon regulatory factor 3 (IRF-3) - Homo sapiens (Human)	IRF3_HUMAN	N	0.034246	1	1	1	1	8.48212	6.05538	1	4.1993	3.79672	4
521044	Q9UNK0	Syntaxin-8 - Homo sapiens (Human)	STX8_HUMAN	Y	0.0349605	1	4.89129	1	3.11483	1	1	4.10105	1	7.59345	4
514752	P18084	Integrin beta-5 precursor - Homo sapiens (Human)	ITB5_HUMAN	Y	0.0352109	1	7.85382	9.28647	1.43929	4.24106	0.768587	8.2021	1	1	4
511532	Q9NVP4	Protein C20orf12 - Homo sapiens (Human)	CT012_HUMAN	N	0.0355901	2.26487	1.53477	2.48122	0.827351	0.876691	1.09207	2.48608	6.36199	1.38015	4
508849	P31751	RAC-beta serine/threonine-protein kinase (EC 2.7.11.1) (RAC-PK-beta) (Protein kinase Akt-2) (Protein kinase B, beta) (PKB beta) - Homo sapiens (Human)	AKT2_HUMAN	N	0.0364509	4.79812	1	1	4.9276	8.48212	1	1	11.0082	1	4
515445	P09382	Galectin-1 (Lectin galactoside-binding soluble 1) (Beta-galactoside-binding lectin L-14-I) (Lactose-binding lectin 1) (S-Lac lectin 1) (Galaptin) (14 kDa lectin) (HPL) (HBL) (Putative MAPK-activating protein MP12) - Homo sapiens (Human)	LEG1_HUMAN	N	0.0376511	1.74792	2.3364	1.30322	1.40828	4.18497	5.66458	3.08086	1.04245	1.2633	4
522497	O75348	Vacuolar ATP synthase subunit G 1 (EC 3.6.3.14) (V-ATPase G subunit 1) (Vacuolar proton pump G subunit 1) (V-ATPase 13 kDa subunit 1) (Vacuolar ATP synthase subunit M16) - Homo sapiens (Human)	VATG1_HUMAN	N	0.0383141	1.21907	1.12321	1.41155	0.964766	2.53626	3.93598	2.30748	3.64952	1.35163	4
519154	Q9NP72	Ras-related protein Rab-18 - Homo sapiens (Human)	RAB18_HUMAN	N	0.0403903	3.0758	0.797379	1.48363	1.80606	10.8884	0.973715	2.89412	2.88502	0.822158	4
513249	Q9H7M9	Platelet receptor Gi24 precursor - Homo sapiens (Human)	GI24_HUMAN	Y	0.0420412	1.41269	2.15725	1.56523	1.43929	8.48212	1	4.78274	0.649775	10.5504	4
508850	Q9Y243	RAC-gamma serine/threonine-protein kinase (EC 2.7.11.1) (RAC-PK-gamma) (Protein kinase Akt-3) (Protein kinase B, gamma) (PKB gamma) (STK-2) - Homo sapiens (Human)	AKT3_HUMAN	N	0.044159	4.79812	1	1	3.37019	8.48212	1	1	11.0082	1	4
508848	P31749	RAC-alpha serine/threonine-protein kinase (EC 2.7.11.1) (RAC-PK-alpha) (Protein kinase B) (PKB) (C-AKT) - Homo sapiens (Human)	AKT1_HUMAN	N	0.0441852	4.79812	1	1	3.37019	8.55357	1	1	11.0082	1	4
512219	Q16555	Dihydropyrimidinase-related protein 2 (DRP-2) (Collapsin response mediator protein 2) (CRMP-2) (N2A3) - Homo sapiens (Human)	DPYL2_HUMAN	N	0.0462227	1.7812	18.1533	1.77127	1.93907	3.8748	2.98088	1.59072	2.20134	1.44327	4
521460	Q969X1	Transmembrane BAX inhibitor motif-containing protein 1 (RECS1 protein homolog) - Homo sapiens (Human)	TMBI1_HUMAN	Y	0.0500569	1	4.89129	1	0.907458	4.24106	3.32204	4.10105	1	1	4
513133	Q14397	Glucokinase regulatory protein (Glucokinase regulator) - Homo sapiens (Human)	GCKR_HUMAN	N	0.0530862	1	1.90858	0.858356	1	4.38395	1	4.10105	3.66939	3.51679	4
508480	P52209	6-phosphogluconate dehydrogenase, decarboxylating (EC 1.1.1.44) - Homo sapiens (Human)	6PGD_HUMAN	N	0.0569073	1.23762	3.62042	3.55568	2.05662	17.4236	1.62776	0.562856	1.19071	0.963414	4
520742	O75830	Serpin I2 precursor (Myoepithelium-derived serine protease inhibitor) (Pancpin) (Protease inhibitor 14) (TSA2004) - Homo sapiens (Human)	SPI2_HUMAN	N	0.0584415	2.04403	2.38712	1.27069	1.17492	2.71872	1.3262	3.02437	0.649775	0.949761	4
516616	Q9P289	Serine/threonine-protein kinase MST4 (EC 2.7.11.1) (STE20-like kinase MST4) (MST-4) (Mammalian STE20-like protein kinase 4) (Serine/threonine-protein kinase MASK) (Mst3 and SOK1-related kinase) - Homo sapiens (Human)	MST4_HUMAN	N	0.0628682	9.59624	1	3.99672	5.18297	4.3125	1.12456	1	1	1	4
510257	Q99467	CD180 antigen precursor (Lymphocyte antigen 64) (Radioprotective 105 kDa protein) - Homo sapiens (Human)	CD180_HUMAN	Y	0.0653814	1	26.524	0.755151	1.24283	38.8125	6.34973	4.80848	1	1.11496	4
521014	Q9P2W9	Syntaxin-18 (Cell growth-inhibiting gene 9 protein) - Homo sapiens (Human)	STX18_HUMAN	Y	0.0672282	1	9.78258	1	3.37019	1	3.02769	1	1.03449	3.79672	4
513625	Q14161	ARF GTPase-activating protein GIT2 (G protein-coupled receptor kinase-interactor 2) (GRK-interacting protein 2) (Cool-interacting tyrosine-phosphorylated protein 2) (CAT2) (CAT-2) - Homo sapiens (Human)	GIT2_HUMAN	N	0.0687883	1	1.65172	4.70201	1.91419	4.41781	6.34973	1.70262	1	7.03359	4
521158	Q9NYB0	Telomeric repeat-binding factor 2-interacting protein 1 (TRF2-interacting telomeric protein Rap1) (hRap1) - Homo sapiens (Human)	TE2IP_HUMAN	N	0.0689373	1	4.89129	5.28975	0.962312	4.24106	3.32204	1	1	0.801251	4
516447	Q9UJ70	N-acetylglucosamine kinase (EC 2.7.1.59) (GlcNAc kinase) - Homo sapiens (Human)	NAGK_HUMAN	N	0.0691126	3.56521	6.74638	1.86764	1.24411	183.317	1.03558	3.59771	0.15697	1.05764	4
514696	Q9Y5U9	Immediate early response 3-interacting protein 1 - Homo sapiens (Human)	IR3IP_HUMAN	Y	0.0709396	1	1.57558	0.29084	6.22966	4.38395	4.83588	1	4.1993	0.881132	4
513455	P35754	Glutaredoxin-1 (Thioltransferase-1) (TTase-1) - Homo sapiens (Human)	GLRX1_HUMAN	N	0.0733086	1	1.8173	3.22087	3.45697	10.9233	7.48232	1	1	1.21721	4
518763	Q9H939	Proline-serine-threonine phosphatase-interacting protein 2 - Homo sapiens (Human)	PPIP2_HUMAN	N	0.0780468	1	4.89129	14.635	1	4.38395	3.32204	1	1	1	4
522692	Q9C0E2	Exportin-4 (Exp4) - Homo sapiens (Human)	XPO4_HUMAN	N	0.0781012	1.14003	1	3.99672	3.11483	4.3125	0.843309	1	1.59639	3.51679	4
509128	P29972	Aquaporin-1 (AQP-1) (Aquaporin-CHIP) (Water channel protein for red blood cells and kidney proximal tubule) (Urine water channel) - Homo sapiens (Human)	AQP1_HUMAN	Y	0.0792691	1	4.89129	1	3.62555	1	14.5076	1	1	3.79672	4
514210	P01743	Ig heavy chain V-I region HG3 precursor - Homo sapiens (Human)	HV1B_HUMAN	N	0.0834105	1	2.49313	1.16241	1	15.1295	4.68871	1.2425	1	7.31352	4
509352	Q9ULZ3	Apoptosis-associated speck-like protein containing a CARD (hASC) (PYD and CARD domain-containing protein) (Target of methylation-induced silencing 1) (Caspase recruitment domain-containing protein 5) - Homo sapiens (Human)	ASC_HUMAN	N	0.0839203	0.63052	6.30233	5.5244	1.75753	66.951	9.96612	1.05117	0.17708	1.39963	4
520284	Q96B97	SH3-domain kinase-binding protein 1 (Cbl-interacting protein of 85 kDa) (Human Src-family kinase-binding protein 1) (HSB-1) (CD2-binding protein 3) (CD2BP3) - Homo sapiens (Human)	SH3K1_HUMAN	N	0.0861979	3.40269	0.0370639	0.214765	3.55175	1	0.253853	4.10105	1.03449	3.51679	4
516907	Q15080	Neutrophil cytosol factor 4 (NCF-4) (Neutrophil NADPH oxidase factor 4) (p40-phox) (p40phox) - Homo sapiens (Human)	NCF4_HUMAN	N	0.0893393	1	1	23.9215	3.0275	25.8036	0.292895	4.4419	1	1	4
518466	Q8NEY8	Periphilin-1 (Gastric cancer antigen Ga50) - Homo sapiens (Human)	PPHLN_HUMAN	N	0.089988	3.40269	1	1	1	4.24106	6.05538	1	0.281925	5.41515	4
513758	Q6NXT2	Histone H3-like - Homo sapiens (Human)	H3L_HUMAN	N	0.0902519	0.574212	0.93671	2.70546	0.778817	1.07737	2.7848	1.9345	7.76621	7.09179	4
520597	Q9BZZ2	Sialoadhesin precursor (Sialic acid-binding Ig-like lectin 1) (Siglec-1) (CD169 antigen) - Homo sapiens (Human)	SN_HUMAN	Y	0.0903932	1	102.238	0.364667	1.29225	28.3436	0.678187	13.8492	1	7.59345	4
514245	P01765	Ig heavy chain V-III region TIL - Homo sapiens (Human)	HV3D_HUMAN	N	0.0909902	0.891244	4.98625	5.28975	1	4.3125	1	3.58298	1	1.6025	4
515023	Q68DU8	BTB/POZ domain-containing protein KCTD16 - Homo sapiens (Human)	KCD16_HUMAN	N	0.0913985	4.10986	5.92505	1.42638	0.551169	3.38357	1	1.2425	1.70113	5.55512	4
512330	O60739	Eukaryotic translation initiation factor 1b (eIF1b) (Protein translation factor SUI1 homolog GC20) - Homo sapiens (Human)	EIF1B_HUMAN	N	0.0917645	4.10041	1.45032	0.858356	1.08056	4.24106	4.83588	0.696427	3.66939	0.881132	4
513080	P12318	Low affinity immunoglobulin gamma Fc region receptor II-a precursor (Fc-gamma RII-a) (FcRII-a) (IgG Fc receptor II-a) (Fc-gamma-RIIa) (CD32 antigen) (CDw32) - Homo sapiens (Human)	FCG2A_HUMAN	Y	0.0931047	1	24.4565	0.987507	1.05964	15.058	1	2.73955	1	3.79672	4
520199	Q9UIB8	SLAM family member 5 precursor (Signaling lymphocytic activation molecule 5) (Leukocyte differentiation antigen CD84) (CD84 antigen) (Cell surface antigen MAX.3) (Hly9-beta) - Homo sapiens (Human)	SLAF5_HUMAN	Y	0.0966195	1	14.6739	1.16241	0.413377	13.009	1	4.78274	1	3.51679	4
509445	P49407	Beta-arrestin-1 (Arrestin beta 1) - Homo sapiens (Human)	ARRB1_HUMAN	N	0.0967583	9.20444	2.90065	18.5729	1.81019	38.8125	0.562282	1.34472	1	1	4
517086	Q9Y5S8	NADPH oxidase homolog 1 (NOX-1) (NOH-1) (NADH/NADPH mitogenic oxidase subunit P65-MOX) (Mitogenic oxidase 1) (MOX1) - Homo sapiens (Human)	NOX1_HUMAN	Y	0.0977894	1	24.0783	3.1583	1.04538	6.1075	1.94602	3.28361	1	1	4
513364	O14976	Cyclin G-associated kinase (EC 2.7.11.1) - Homo sapiens (Human)	GAK_HUMAN	N	0.0993671	1.56827	0.787791	11.2848	1.99301	4.24106	2.03456	1.52215	4.1993	0.916201	4
513755	P68431	Histone H3.1 (H3/a) (H3/b) (H3/c) (H3/d) (H3/f) (H3/h) (H3/i) (H3/j) (H3/k) (H3/l) - Homo sapiens (Human)	H31_HUMAN	N	0.101264	0.547677	1.10526	2.11373	0.822437	1.61405	2.14993	1.31853	7.98725	3.56631	4
518067	P27986	Phosphatidylinositol 3-kinase regulatory subunit alpha (PI3-kinase p85-subunit alpha) (PtdIns-3-kinase p85-alpha) (PI3K) - Homo sapiens (Human)	P85A_HUMAN	N	0.102635	1	1	4.64323	6.48502	1	3.02769	0.291225	3.66939	1	4
514194	P00738	Haptoglobin precursor [Contains: Haptoglobin alpha chain; Haptoglobin beta chain] - Homo sapiens (Human)	HPT_HUMAN	N	0.103478	5.02227	5.97221	0.799519	0.970908	3.65372	0.998621	3.09866	0.21592	1.75377	4
520783	Q9Y6N5	Sulfide:quinone oxidoreductase, mitochondrial precursor (EC 1.-.-.-) - Homo sapiens (Human)	SQRD_HUMAN	N	0.10634	1.47631	15.612	0.98769	1.08929	3.57072	4.73631	3.2847	1	1.8945	4
517531	Q9NZT2	Opioid growth factor receptor (OGFr) (Zeta-type opioid receptor) (7-60 protein) - Homo sapiens (Human)	OGFR_HUMAN	N	0.108563	1.17103	3.97281	2.78825	3.59163	0.635292	1.78617	0.480558	2.43965	0.621242	4
520050	Q6PCB7	Long-chain fatty acid transport protein 1 (EC 6.2.1.-) (Fatty acid transport protein 1) (FATP-1) (Solute carrier family 27 member 1) - Homo sapiens (Human)	S27A1_HUMAN	Y	0.110742	1	9.78258	1	0.257638	6.43303	6.05538	1	4.95401	1	4
516040	P48163	NADP-dependent malic enzyme (EC 1.1.1.40) (NADP-ME) (Malic enzyme 1) - Homo sapiens (Human)	MAOX_HUMAN	N	0.111071	1	4.89129	1	3.62555	10.8884	1	0.291225	1	3.65676	4
513678	Q86W33	Integral membrane protein GPR175 - Homo sapiens (Human)	GP175_HUMAN	Y	0.111822	1	0.296512	3.99672	3.62555	1	1	9.56549	1	3.65676	4
520438	P50452	Serpin B8 (Cytoplasmic antiproteinase 2) (CAP-2) (CAP2) (Protease inhibitor 8) - Homo sapiens (Human)	SPB8_HUMAN	N	0.112457	2.36198	2.65341	1.22954	1.16618	3.26028	1.19264	3.56713	0.649775	0.949934	4
510610	Q9NZZ3	Charged multivesicular body protein 5 (Chromatin-modifying protein 5) (Vacuolar protein sorting 60) (Vps60) (hVps60) (SNF7 domain-containing protein 2) - Homo sapiens (Human)	CHMP5_HUMAN	N	0.114166	4.85088	0.282041	1.71671	4.9276	15.2724	1.38239	1.40107	5.76904	1.07229	4
514834	O60271	C-jun-amino-terminal kinase-interacting protein 4 (JNK-interacting protein 4) (JIP-4) (JNK-associated leucine-zipper protein) (JLP) (Sperm-associated antigen 9) (Mitogen-activated protein kinase 8-interacting protein 4) (Human lung canc	JIP4_HUMAN	N	0.114528	1	1.45032	1.16241	3.48296	4.38395	0.886795	2.38866	0.947159	2.6434	4
513083	P08637	Low affinity immunoglobulin gamma Fc region receptor III-A precursor (IgG Fc receptor III-2) (Fc-gamma RIII-alpha) (Fc-gamma RIIIa) (FcRIIIa) (Fc-gamma RIII) (FcRIII) (FcR-10) (CD16a antigen) - Homo sapiens (Human)	FCG3A_HUMAN	Y	0.114725	1	14.2957	0.764831	0.980751	32.3795	1	6.5958	1	3.51679	4
520228	Q9Y336	Sialic acid-binding Ig-like lectin 9 precursor (Siglec-9) (Protein FOAP-9) - Homo sapiens (Human)	SIGL9_HUMAN	Y	0.117662	1	1	1.71671	4.99734	6.50448	1	4.10105	1	3.65676	4
519861	Q9UPU9	Sterile alpha motif domain-containing protein 4 - Homo sapiens (Human)	SAMD4_HUMAN	N	0.118209	1	1	4.64323	5.18297	1	15.1384	4.78274	1	0.25055	4
512495	Q96C19	EF-hand domain-containing protein 2 (Swiprosin-1) - Homo sapiens (Human)	EFHD2_HUMAN	N	0.119331	1.05374	0.512968	13.811	1.38715	17.25	1.15125	4.30138	3.91951	0.885543	4
510611	Q96FZ7	Charged multivesicular body protein 6 (Chromatin-modifying protein 6) (Vacuolar protein sorting-associated protein 20) (hVps20) - Homo sapiens (Human)	CHMP6_HUMAN	N	0.119699	1.54427	3.65066	7.99345	0.421771	4.38395	0.223995	8.2021	1	1.44615	4
519155	P10114	Ras-related protein Rap-2a (RbBP-30) - Homo sapiens (Human)	RAP2A_HUMAN	N	0.120206	1	2.84546	1.93164	1.80108	5.85157	0.354101	5.03992	1	7.03359	4
519157	Q9Y3L5	Ras-related protein Rap-2c precursor - Homo sapiens (Human)	RAP2C_HUMAN	N	0.120206	1	2.84546	1.93164	1.80108	5.85157	0.354101	5.03992	1	7.03359	4
521117	O95926	Pre-mRNA-splicing factor SYF2 (CCNDBP1-interactor) (p29) - Homo sapiens (Human)	SYF2_HUMAN	N	0.120592	6.80538	29.3477	1	7.25111	1	1	1	1	3.51679	4
522527	Q93050	Vacuolar proton translocating ATPase 116 kDa subunit a isoform 1 (V-ATPase 116 kDa isoform a1) (Clathrin-coated vesicle/synaptic vesicle proton pump 116 kDa subunit) (Vacuolar proton pump subunit 1) (Vacuolar adenosine triphosphatase su	VPP1_HUMAN	Y	0.12925	4.10041	1.59294	1.16241	1.62036	21.4911	3.17486	14.6945	0.281925	0.877746	4
513097	P55899	IgG receptor FcRn large subunit p51 precursor (FcRn) (Neonatal Fc receptor) (IgG Fc fragment receptor transporter, alpha chain) - Homo sapiens (Human)	FCGRN_HUMAN	Y	0.135064	1.0429	107.13	0.600384	0.812844	10.5502	11.2833	6.12234	1	1.88635	4
513207	Q9NUV9	GTPase, IMAP family member 4 (Immunity-associated protein 4) (Immunity-associated nucleotide 1 protein) (hIAN1) - Homo sapiens (Human)	GIMA4_HUMAN	N	0.137839	1	78.0213	5.00731	1.2842	17.1446	0.886795	1.57667	1	3.51679	4
520878	P12081	Histidyl-tRNA synthetase, cytoplasmic (EC 6.1.1.21) (Histidine--tRNA ligase) (HisRS) - Homo sapiens (Human)	SYHC_HUMAN	N	0.138714	2.59122	11.8501	0.626897	0.914601	1.45321	2.20702	0.877513	2.66093	1.40034	4
521577	O60603	Toll-like receptor 2 precursor (Toll/interleukin 1 receptor-like protein 4) (CD282 antigen) - Homo sapiens (Human)	TLR2_HUMAN	Y	0.139331	1	19.5652	0.247079	2.61582	4.6402	1	4.4419	1	1	4
517208	O95989	Diphosphoinositol polyphosphate phosphohydrolase 1 (EC 3.6.1.52) (DIPP-1) (Diadenosine 5',5'''-P1,P6-hexaphosphate hydrolase 1) (EC 3.6.1.-) (Nucleoside diphosphate-linked moiety X motif 3) (Nudix motif 3) - Homo sapiens (Human)	NUDT3_HUMAN	N	0.139886	9.90216	1	1	3.57813	13.1518	1.03881	1	0.281925	3.51679	4
512759	P34910	EVI2B protein precursor (Ecotropic viral integration site 2B protein homolog) (EVI-2B) - Homo sapiens (Human)	EVI2B_HUMAN	Y	0.141888	1	5.40817	17.9264	0.331402	13.1518	1	15.7171	1	1	4
508671	O60488	Long-chain-fatty-acid--CoA ligase 4 (EC 6.2.1.3) (Long-chain acyl-CoA synthetase 4) (LACS 4) - Homo sapiens (Human)	ACSL4_HUMAN	Y	0.142745	1.1838	2.97098	3.33525	0.815656	3.34171	2.99624	1.10093	0.617576	0.84081	4
513361	O15117	FYN-binding protein (FYN-T-binding protein) (FYB-120/130) (p120/p130) (SLP-76-associated phosphoprotein) (SLAP-130) - Homo sapiens (Human)	FYB_HUMAN	N	0.143947	1	4.89129	8.63996	2.76814	8.55357	1	1	1	1	4
516419	Q8TDZ2	NEDD9-interacting protein with calponin homology and LIM domains (Molecule interacting with CasL protein 1) - Homo sapiens (Human)	MICA1_HUMAN	N	0.146209	1	4.89129	10.6383	1.50335	4.24106	1	1	1	3.51679	4
510702	Q7L1S5	Carbohydrate sulfotransferase 9 (EC 2.8.2.-) (N-acetylgalactosamine-4-O-sulfotransferase 2) (GalNAc-4-O-sulfotransferase 2) (GalNAc-4-ST2) - Homo sapiens (Human)	CHST9_HUMAN	Y	0.147226	0.227027	4.89129	1	0.843542	4.24106	1	4.4419	3.66939	1.70976	4
514292	P09601	Heme oxygenase 1 (EC 1.14.99.3) (HO-1) - Homo sapiens (Human)	HMOX1_HUMAN	Y	0.150252	1	238.476	1.24706	1.38521	120.321	0.708203	2.88576	1	7.17355	4
516929	P55160	Nck-associated protein 1-like (Membrane-associated protein HEM-1) (Hematopoietic protein 1) - Homo sapiens (Human)	NCKPL_HUMAN	N	0.150393	1	9.78258	4.64323	1.804	17.1786	1	10.5935	1	0.219115	4
509656	Q9Y679	Ancient ubiquitous protein 1 precursor - Homo sapiens (Human)	AUP1_HUMAN	Y	0.151439	3.40269	1.4145	0.911671	0.665856	21.7054	1.21515	0.264879	8.94822	3.45224	4
519590	P06702	Protein S100-A9 (S100 calcium-binding protein A9) (Calgranulin-B) (Migration inhibitory factor-related protein 14) (MRP-14) (P14) (Leukocyte L1 complex heavy chain) (Calprotectin L1H subunit) - Homo sapiens (Human)	S10A9_HUMAN	N	0.151846	2.0216	1.93815	1.70509	1.03106	3.20242	2.94799	3.08181	0.0543821	1.09571	4
521367	Q8TC07	TBC1 domain family member 15 - Homo sapiens (Human)	TBC15_HUMAN	N	0.152061	0.2376	0.16106	0.997204	10.8767	8.76789	2.30576	11.2752	1	1	4
515006	Q96CX2	BTB/POZ domain-containing protein KCTD12 (Pfetin) (Predominantly fetal expressed T1 domain) - Homo sapiens (Human)	KCD12_HUMAN	N	0.152316	1.02662	5.79998	1.16062	1.25557	9.10022	2.66603	2.90556	1.49728	0.918598	4
509165	P28838	Cytosol aminopeptidase (EC 3.4.11.1) (Leucine aminopeptidase) (LAP) (Leucyl aminopeptidase) (Proline aminopeptidase) (EC 3.4.11.5) (Prolyl aminopeptidase) (Peptidase S) - Homo sapiens (Human)	AMPL_HUMAN	N	0.156364	1.0829	2.23931	1.37094	1.09845	3.60302	2.82144	1.247	2.08487	1.26406	4
513979	P06865	Beta-hexosaminidase alpha chain precursor (EC 3.2.1.52) (N-acetyl-beta-glucosaminidase) (Beta-N-acetylhexosaminidase) (Hexosaminidase A) - Homo sapiens (Human)	HEXA_HUMAN	N	0.161999	0.521448	2.18259	0.630145	1.13341	101.165	0.740551	4.1976	0.99871	2.34274	4
508922	Q8IZ07	Ankyrin repeat domain-containing protein 13A (Protein KE03) - Homo sapiens (Human)	AN13A_HUMAN	N	0.163818	1	1	13.9297	3.37019	0.19534	6.05538	1	1	3.51679	4
509476	Q7L5N7	Acyltransferase-like 1 (EC 2.3.1.-) - Homo sapiens (Human)	AYTL1_HUMAN	Y	0.170618	0.310301	4.81075	5.79433	0.868798	3.08635	1.45527	2.30853	1	1.74877	4
510589	Q9UQN3	Charged multivesicular body protein 2b (Chromatin-modifying protein 2b) (CHMP2b) (CHMP2.5) (Vacuolar protein sorting 2-2) (Vps2-2) (hVps2-2) - Homo sapiens (Human)	CHM2B_HUMAN	N	0.170701	6.49946	0.296512	1.16241	3.62555	4.38395	1.29601	1.81441	6.03399	0.25055	4
511834	O94760	NG,NG-dimethylarginine dimethylaminohydrolase 1 (EC 3.5.3.18) (Dimethylargininase-1) (Dimethylarginine dimethylaminohydrolase 1) (DDAHI) (DDAH-1) - Homo sapiens (Human)	DDAH1_HUMAN	N	0.170988	2.30393	5.92505	1	3.62555	0.19534	20.563	0.291225	1.76519	0.822158	4
509739	P02747	Complement C1q subcomponent subunit C precursor - Homo sapiens (Human)	C1QC_HUMAN	N	0.173228	1	15.7076	4.64323	1.33533	1.03155	0.886795	6.49242	1	3.79672	4
515385	P05771	Protein kinase C beta type (EC 2.7.11.13) (PKC-beta) (PKC-B) - Homo sapiens (Human)	KPCB_HUMAN	N	0.176368	0.377845	15.1908	7.72657	0.226864	23.8259	1	1.39285	1	3.79672	4
508775	Q9BRR6	ADP-dependent glucokinase (EC 2.7.1.147) (ADPGK) (ADP-GK) (RbBP-35) - Homo sapiens (Human)	ADPGK_HUMAN	N	0.179298	0.217355	5.76508	3.65458	0.771411	25.875	0.759738	1.73548	1	2.27297	4
513161	Q9H4G4	Golgi-associated plant pathogenesis-related protein 1 (Golgi-associated PR-1 protein) (GAPR-1) (Glioma pathogenesis-related protein 2) (GliPR 2) - Homo sapiens (Human)	GAPR1_HUMAN	N	0.181379	0.63052	25.4902	2.80266	1.42393	1.12458	3.17486	4.7689	1	0.25055	4
511508	Q6PD62	RNA polymerase-associated protein CTR9 homolog (SH2 domain-binding protein 1) - Homo sapiens (Human)	CTR9_HUMAN	N	0.18414	0.507475	1.75685	3.99672	0.727426	4.24106	0.886795	0.296981	14.6776	4.68547	4
518848	Q05209	Tyrosine-protein phosphatase non-receptor type 12 (EC 3.1.3.48) (Protein-tyrosine phosphatase G1) (PTPG1) - Homo sapiens (Human)	PTN12_HUMAN	N	0.193451	0.2376	0.787791	9.28647	5.18297	4.38395	0.768587	1	3.66939	1	4
519309	Q8N392	Rho-GTPase-activating protein 18 (MacGAP) - Homo sapiens (Human)	RHG18_HUMAN	N	0.193461	1	1	1	2.07174	17.1071	3.02769	4.4419	1	1	4
522135	Q969T4	Ubiquitin-conjugating enzyme E2 E3 (EC 6.3.2.19) (Ubiquitin-protein ligase E3) (Ubiquitin carrier protein E3) (Ubiquitin-conjugating enzyme E2-23 kDa) (UbcH9) (UbcM2) - Homo sapiens (Human)	UB2E3_HUMAN	N	0.193953	1	1	1	3.11483	4.24106	3.02769	1	1.07184	3.51679	4
522711	Q13426	DNA-repair protein XRCC4 (X-ray repair cross-complementing protein 4) - Homo sapiens (Human)	XRCC4_HUMAN	N	0.196855	1	1	3.99672	3.11483	8.48212	0.973008	0.291225	0.855831	2.12084	4
522439	Q9Y279	V-set and immunoglobulin domain-containing protein 4 precursor (Protein Z39Ig) - Homo sapiens (Human)	VSIG4_HUMAN	Y	0.197093	1	61.4186	0.788439	0.874634	114.174	1	31.775	1	3.51679	4
513081	P31994	Low affinity immunoglobulin gamma Fc region receptor II-b precursor (Fc-gamma RII-b) (FcRII-b) (IgG Fc receptor II-b) (Fc-gamma-RIIb) (CD32 antigen) (CDw32) - Homo sapiens (Human)	FCG2B_HUMAN	Y	0.201045	1	3.64274	0.482456	0.93408	5.05443	0.886795	5.88561	1	5.55512	4
513082	P31995	Low affinity immunoglobulin gamma Fc region receptor II-c precursor (Fc-gamma RII-c) (FcRII-c) (IgG Fc receptor II-c) (Fc-gamma-RIIc) (CD32 antigen) (CDw32) - Homo sapiens (Human)	FCG2C_HUMAN	Y	0.201045	1	3.64274	0.482456	0.93408	5.05443	0.886795	5.88561	1	5.55512	4
510252	Q9Y2R0	Coiled-coil domain-containing protein 56 - Homo sapiens (Human)	CCD56_HUMAN	Y	0.202532	0.891368	0.941922	4.64323	1.28361	4.3125	0.292895	2.43587	2.81032	1.70009	4
511471	O43402	Neighbor of COX4 - Homo sapiens (Human)	CX4NB_HUMAN	N	0.203109	10.2081	3.09026	0.858356	3.11483	0.828449	0.929902	1	3.66939	0.695918	4
521756	Q14669	Thyroid receptor-interacting protein 12 (TRIP12) - Homo sapiens (Human)	TRIPC_HUMAN	N	0.207297	0.275389	0.725162	1.641	2.31616	25.7321	1.01678	8.88379	0.281925	9.07191	4
508999	Q9P2R3	Ankyrin repeat and FYVE domain-containing protein 1 (Ankyrin repeats hooked to a zinc finger motif) - Homo sapiens (Human)	ANFY1_HUMAN	N	0.210568	0.217355	5.92505	0.962969	3.02727	7.15346	3.22379	0.889205	0.659166	0.59408	4
520996	Q03519	Antigen peptide transporter 2 (APT2) (ATP-binding cassette sub-family B member 3) (Peptide transporter TAP2) (Peptide transporter PSF2) (Peptide supply factor 2) (PSF-2) (Peptide transporter involved in antigen processing 2) - Homo sapi	TAP2_HUMAN	Y	0.211626	0.489925	13.4371	2.62366	1.03991	1.84163	1.02935	1.23343	7.33878	2.07955	4
515714	Q07954	Low-density lipoprotein receptor-related protein 1 precursor (LRP) (Alpha-2-macroglobulin receptor) (A2MR) (Apolipoprotein E receptor) (APOER) (CD91 antigen) - Homo sapiens (Human)	LRP1_HUMAN	Y	0.213535	1.54501	7.88566	0.88957	0.881013	9.62395	13.4687	11.2292	1	1.27674	4
512043	O14972	Down syndrome critical region protein 3 (Down syndrome critical region protein A) - Homo sapiens (Human)	DSCR3_HUMAN	N	0.215561	1	1	3.99672	1.05964	6.43303	0.223995	14.3482	0.281925	3.51679	4
508429	P04222	HLA class I histocompatibility antigen, Cw-3 alpha chain precursor (MHC class I antigen Cw*3) - Homo sapiens (Human)	1C03_HUMAN	Y	0.218055	1.02179	6.92313	1.488	1.25225	0.799169	3.25068	2.60159	10.2333	0.634138	4
522910	Q96JP5	Zinc finger protein 91 homolog (Zfp-91) - Homo sapiens (Human)	ZFP91_HUMAN	N	0.219095	3.40269	0.87104	0.214765	5.18297	1	4.68871	1.99002	0.947159	2.12084	4
518481	Q00169	Phosphatidylinositol transfer protein alpha isoform (PtdIns transfer protein alpha) (PtdInsTP) (PI-TP-alpha) - Homo sapiens (Human)	PIPNA_HUMAN	N	0.220776	1	4.89129	1	8.2978	8.48212	0.411735	1	4.1993	0.219115	4
521507	P29144	Tripeptidyl-peptidase 2 (EC 3.4.14.10) (Tripeptidyl-peptidase II) (TPP-II) (Tripeptidyl aminopeptidase) - Homo sapiens (Human)	TPP2_HUMAN	N	0.221147	1.84481	0.978157	2.48913	3.95696	2.34505	3.71961	1.34576	0.467825	1.73762	4
521553	P51580	Thiopurine S-methyltransferase (EC 2.1.1.67) (Thiopurine methyltransferase) - Homo sapiens (Human)	TPMT_HUMAN	N	0.222475	0.910642	1	1	3.11483	4.24106	6.05538	1	3.66939	1	4
516097	Q16644	MAP kinase-activated protein kinase 3 (EC 2.7.11.1) (MAPK-activated protein kinase 3) (MAPKAP kinase 3) (MAPKAPK-3) (Chromosome 3p kinase) (3pK) - Homo sapiens (Human)	MAPK3_HUMAN	N	0.222713	1	1	3.99672	3.24634	4.24106	0.805948	1.39285	3.66939	0.233781	4
520735	Q9UQ90	Paraplegin (EC 3.4.24.-) (Spastic paraplegia protein 7) - Homo sapiens (Human)	SPG7_HUMAN	Y	0.224014	0.969325	2.97961	0.858356	1	4.24106	0.678187	4.4419	1	3.51679	4
509660	O95817	BAG family molecular chaperone regulator 3 (BCL-2-binding athanogene-3) (BAG-3) (Bcl-2-binding protein Bis) (Docking protein CAIR-1) - Homo sapiens (Human)	BAG3_HUMAN	N	0.224875	3.40269	0.0241042	0.987507	0.838162	4.24106	0.271058	0.479662	2.06898	2.01846	4
516797	Q13287	N-myc-interactor (Nmi) (N-myc and STAT interactor) - Homo sapiens (Human)	NMI_HUMAN	N	0.227387	1	0.32212	13.2832	0.734147	6.43303	4.83588	2.38866	1	1	4
521736	O14657	Torsin B precursor (Torsin family 1 member B) - Homo sapiens (Human)	TOR1B_HUMAN	Y	0.229805	3.40269	9.78258	0.29084	0.690679	0.842405	8.01075	3.98004	1	1	4
512179	P51452	Dual specificity protein phosphatase 3 (EC 3.1.3.48) (EC 3.1.3.16) (Dual specificity protein phosphatase VHR) - Homo sapiens (Human)	DUS3_HUMAN	N	0.232234	0.765151	0.222049	3.12226	8.55131	3.44729	0.791004	0.851308	1.34647	2.36331	4
515785	P10253	Lysosomal alpha-glucosidase precursor (EC 3.2.1.20) (Acid maltase) (Aglucosidase alfa) [Contains: 76 kDa lysosomal alpha-glucosidase; 70 kDa lysosomal alpha-glucosidase] - Homo sapiens (Human)	LYAG_HUMAN	Y	0.233117	0.295837	1.27262	0.754326	0.757836	12.7385	0.700589	3.1063	2.33403	2.14226	4
511846	Q01459	Di-N-acetylchitobiase precursor (EC 3.2.1.-) - Homo sapiens (Human)	DIAC_HUMAN	N	0.233235	0.217355	4.89129	1.35044	0.907458	4.24106	0.74412	0.296981	7.33878	3.51679	4
514799	P19823	Inter-alpha-trypsin inhibitor heavy chain H2 precursor (ITI heavy chain H2) (Inter-alpha-inhibitor heavy chain 2) (Inter-alpha-trypsin inhibitor complex component II) (Serum-derived hyaluronan-associated protein) (SHAP) - Homo sapiens	ITIH2_HUMAN	N	0.233657	0.644243	14.5688	1.1209	0.491154	0.931301	3.4533	2.97362	0.367586	3.38921	4
517801	Q460N5	Poly [ADP-ribose] polymerase 14 (EC 2.4.2.30) (PARP-14) (B aggressive lymphoma protein 2) - Homo sapiens (Human)	PAR14_HUMAN	N	0.234627	0.559503	8.37069	5.15014	1.28669	5.89683	25.3989	0.66746	1	1.74248	4
518680	O43395	U4/U6 small nuclear ribonucleoprotein Prp3 (Pre-mRNA-splicing factor 3) (U4/U6 snRNP 90 kDa protein) (hPrp3) - Homo sapiens (Human)	PRPF3_HUMAN	N	0.235054	4.79812	1.66115	4.64323	0.894533	4.38395	7.7164	1.31916	0.452784	1.11406	4
519350	P84095	Rho-related GTP-binding protein RhoG precursor - Homo sapiens (Human)	RHOG_HUMAN	N	0.239985	0.918997	6.89785	1.65054	1.36581	5.83652	1.13961	0.367609	2.50986	2.20859	4
518315	P48426	Phosphatidylinositol-4-phosphate 5-kinase type-2 alpha (EC 2.7.1.68) (Phosphatidylinositol-4-phosphate 5-kinase type II alpha) (1-phosphatidylinositol-4-phosphate 5-kinase 2-alpha) (PtdIns(4)P-5-kinase isoform 2-alpha) (PIP5KII-alpha)	PI52A_HUMAN	N	0.240088	1.14003	4.35097	19.2194	1.05623	0.280802	4.83588	1.39285	1	3.79672	4
511700	Q13098	COP9 signalosome complex subunit 1 (Signalosome subunit 1) (SGN1) (JAB1-containing signalosome subunit 1) (G protein pathway suppressor 1) (Protein GPS1) (Protein MFH) - Homo sapiens (Human)	CSN1_HUMAN	N	0.241207	2.95837	0.154393	0.858356	3.51035	0.828449	3.27621	0.65958	0.17708	5.7551	4
516312	Q16539	Mitogen-activated protein kinase 14 (EC 2.7.11.24) (Mitogen-activated protein kinase p38 alpha) (MAP kinase p38 alpha) (Cytokine suppressive anti-inflammatory drug-binding protein) (CSAID-binding protein) (CSBP) (MAX-interacting protein	MK14_HUMAN	N	0.245497	0.217355	1	7.99345	3.61202	12.9375	1.27418	0.149973	1	3.79672	4
512117	O43491	Band 4.1-like protein 2 (Generally expressed protein 4.1) (4.1G) - Homo sapiens (Human)	E41L2_HUMAN	N	0.247095	1	3.48416	1.71671	2.60845	2.48535	3.08324	1.88145	0.342084	1.70415	4
520817	P50224	Monoamine-sulfating phenol sulfotransferase (EC 2.8.2.1) (Aryl sulfotransferase 1A3) (Sulfotransferase, monoamine-preferring) (M-PST) (Thermolabile phenol sulfotransferase) (TL-PST) (Placental estrogen sulfotransferase) (Catecholamine-	ST1A3_HUMAN	N	0.252207	4.79812	14.6739	0.8205	0.595048	3.78818	0.768587	8.88379	1	1	4
514814	Q14624	Inter-alpha-trypsin inhibitor heavy chain H4 precursor (ITI heavy chain H4) (Inter-alpha-inhibitor heavy chain 4) (Inter-alpha-trypsin inhibitor family heavy chain-related protein) (IHRP) (Plasma kallikrein sensitive glycoprotein 120)	ITIH4_HUMAN	N	0.252449	3.40269	23.9005	1.30261	0.868289	0.39272	9.08306	1.87244	0.17708	4.06759	4
514090	O75874	Isocitrate dehydrogenase [NADP] cytoplasmic (EC 1.1.1.42) (Cytosolic NADP-isocitrate dehydrogenase) (Oxalosuccinate decarboxylase) (IDH) (NADP(+)-specific ICDH) (IDP) - Homo sapiens (Human)	IDHC_HUMAN	N	0.253295	0.982369	2.97827	0.940654	1.08989	3.76	2.23104	3.47135	1.06393	0.896273	4
521552	P25445	Tumor necrosis factor receptor superfamily member 6 precursor (FASLG receptor) (Apoptosis-mediating surface antigen FAS) (Apo-1 antigen) (CD95 antigen) - Homo sapiens (Human)	TNR6_HUMAN	N	0.253731	0.2376	4.89129	3.99672	1	1	1.8167	2.00949	3.66939	0.951269	4
515762	O60449	Lymphocyte antigen 75 precursor (DEC-205) (gp200-MR6) (CD205 antigen) - Homo sapiens (Human)	LY75_HUMAN	Y	0.258397	1	1	7.99345	3.62555	2.52372	2.10049	1	0.649775	1	4
516318	P41218	Myeloid cell nuclear differentiation antigen - Homo sapiens (Human)	MNDA_HUMAN	N	0.2589	1.04483	29.4489	1.4428	0.930243	14.7072	18.6077	2.94802	1	1.86747	4
521100	Q9Y2Z0	Suppressor of G2 allele of SKP1 homolog (Sgt1) (Putative 40-6-3 protein) - Homo sapiens (Human)	SUGT1_HUMAN	N	0.259568	3.19582	0.116748	7.28811	3.91566	1.25663	0.702879	1.61328	0.713573	3.38679	4
516664	Q12965	Myosin Ie (Myosin Ic) - Homo sapiens (Human)	MYO1E_HUMAN	N	0.260368	3.40269	1	7.53854	0.6709	10.6741	0.331209	4.0793	1	1	4
515338	P06239	Proto-oncogene tyrosine-protein kinase LCK (EC 2.7.10.2) (p56-LCK) (Lymphocyte cell-specific protein-tyrosine kinase) (LSK) (T cell-specific protein-tyrosine kinase) - Homo sapiens (Human)	LCK_HUMAN	N	0.262106	3.40269	4.89129	3.99672	0.265425	1	2.8395	1.2425	0.649775	1	4
511297	Q9Y6N1	Cytochrome c oxidase assembly protein COX11, mitochondrial precursor - Homo sapiens (Human)	COX11_HUMAN	Y	0.263483	1	0.671758	0.858356	0.250295	1	3.32204	4.10105	3.66939	12.8686	4
511758	Q9BPW9	Dehydrogenase/reductase SDR family member 9 precursor (EC 1.1.-.-) (3-alpha hydroxysteroid dehydrogenase) (3alpha-HSD) (RDH-E2) (Short-chain dehydrogenase/reductase retSDR8) (NADP-dependent retinol dehydrogenase/reductase) (RDHL) - Hom	DHRS9_HUMAN	N	0.268697	4.79812	1	0.173417	1	2.14997	6.05538	1.44903	1	3.79672	4
508861	P30038	Delta-1-pyrroline-5-carboxylate dehydrogenase, mitochondrial precursor (EC 1.5.1.12) (P5C dehydrogenase) (Aldehyde dehydrogenase 4A1) - Homo sapiens (Human)	AL4A1_HUMAN	N	0.269712	1	1	0.29084	1.05964	4.38395	0.973008	4.78274	7.30121	2.34274	4
518025	P42785	Lysosomal Pro-X carboxypeptidase precursor (EC 3.4.16.2) (Prolylcarboxypeptidase) (PRCP) (Proline carboxypeptidase) (Angiotensinase C) (Lysosomal carboxypeptidase C) - Homo sapiens (Human)	PCP_HUMAN	Y	0.270857	1.47918	0.326506	8.63996	0.698731	5.05443	3.15074	1.2425	0.669125	7.03359	4
517781	P47712	Cytosolic phospholipase A2 (cPLA2) (Phospholipase A2 group IVA) [Includes: Phospholipase A2 (EC 3.1.1.4) (Phosphatidylcholine 2-acylhydrolase); Lysophospholipase (EC 3.1.1.5)] - Homo sapiens (Human)	PA24A_HUMAN	N	0.277457	1	17.7751	11.9902	1.08949	3.36962	0.951455	1.21794	0.213958	5.41515	4
514306	P05155	Plasma protease C1 inhibitor precursor (C1 Inh) (C1Inh) (C1 esterase inhibitor) (C1-inhibiting factor) - Homo sapiens (Human)	IC1_HUMAN	N	0.280204	0.891244	4.38044	1.12092	0.494095	1.58201	2.19939	4.03728	0.17708	5.9027	4
515016	Q6ZWB6	BTB/POZ domain-containing protein KCTD8 - Homo sapiens (Human)	KCTD8_HUMAN	N	0.283018	2.51978	5.92505	0.997204	0.326977	2.54117	1	1.34576	1.70113	5.55512	4
520934	Q9H2K8	Serine/threonine-protein kinase TAO3 (EC 2.7.11.1) (Thousand and one amino acid protein 3) (Jun kinase-inhibitory kinase) (JNK/SAPK-inhibitory kinase) (Dendritic cell-derived protein kinase) (Cutaneous T-cell lymphoma tumor antigen HD-	TAOK3_HUMAN	N	0.284197	1	1.57558	3.99672	6.74038	0.19534	3.02769	0.199301	1	7.03359	4
515289	Q14739	Lamin-B receptor (Integral nuclear envelope inner membrane protein) (LMN2R) - Homo sapiens (Human)	LBR_HUMAN	Y	0.288676	0.739592	2.18342	4.26841	0.947837	1.98474	2.00709	2.16486	0.247871	1.39184	4
510031	P42574	Caspase-3 precursor (EC 3.4.22.-) (CASP-3) (Apopain) (Cysteine protease CPP32) (Yama protein) (CPP-32) (SREBP cleavage activity 1) (SCA-1) [Contains: Caspase-3 p17 subunit; Caspase-3 p12 subunit] - Homo sapiens (Human)	CASP3_HUMAN	N	0.296103	4.10041	1.45032	7.28811	0.259875	1	2.3032	1.89076	4.1993	1	4
509446	P32121	Beta-arrestin-2 (Arrestin beta 2) - Homo sapiens (Human)	ARRB2_HUMAN	N	0.296737	0.2376	1	15.9281	0.783022	23.6831	3.02769	3.41604	1	1	4
510085	Q13948	Protein CASP - Homo sapiens (Human)	CASP_HUMAN	Y	0.297479	1	0.878651	7.99345	3.62555	1	6.05538	0.291225	0.281925	4.40566	4
516908	Q86Y39	NADH dehydrogenase [ubiquinone] 1 alpha subcomplex subunit 11 (EC 1.6.5.3) (EC 1.6.99.3) (NADH-ubiquinone oxidoreductase subunit B14.7) (Complex I-B14.7) (CI-B14.7) - Homo sapiens (Human)	NDUAB_HUMAN	Y	0.300938	1	0.296512	2.32481	3.11483	8.48212	0.768587	4.78274	1	0.25055	4
518201	Q13526	Peptidyl-prolyl cis-trans isomerase NIMA-interacting 1 (EC 5.2.1.8) (Rotamase Pin1) (PPIase Pin1) - Homo sapiens (Human)	PIN1_HUMAN	N	0.301405	19.8043	0.274675	1	8.2978	0.146	2.23236	1.2425	0.669125	3.65676	4
511409	Q9UBW8	COP9 signalosome complex subunit 7a (Signalosome subunit 7a) (SGN7a) (JAB1-containing signalosome subunit 7a) (Dermal papilla-derived protein 10) - Homo sapiens (Human)	CSN7A_HUMAN	N	0.301908	1	0.393896	3.99672	7.25111	1	3.02769	12.3031	1	0.881132	4
522294	O43914	TYRO protein tyrosine kinase-binding protein precursor (DNAX-activation protein 12) (Killer-activating receptor-associated protein) - Homo sapiens (Human)	TYOBP_HUMAN	Y	0.305676	1	9.78258	1.53847	0.295203	4.3125	1	4.10105	1	3.79672	4
508599	P16219	Short-chain specific acyl-CoA dehydrogenase, mitochondrial precursor (EC 1.3.99.2) (SCAD) (Butyryl-CoA dehydrogenase) - Homo sapiens (Human)	ACADS_HUMAN	N	0.311143	3.40269	4.89129	1	0.516914	0.828449	1.57454	4.10105	1	3.51679	4
513084	O75015	Low affinity immunoglobulin gamma Fc region receptor III-B precursor (IgG Fc receptor III-1) (Fc-gamma RIII-beta) (Fc-gamma RIIIb) (FcRIIIb) (Fc-gamma RIII) (FcRIII) (FcR-10) (CD16b antigen) - Homo sapiens (Human)	FCG3B_HUMAN	Y	0.313686	1	5.92505	0.450146	0.584576	12.9375	1	3.95748	1	3.51679	4
513469	P49863	Granzyme K precursor (EC 3.4.21.-) (Granzyme-3) (NK-tryptase-2) (NK-TRYP-2) (Fragmentin-3) - Homo sapiens (Human)	GRAK_HUMAN	N	0.314613	1	10.2995	13.9297	0.575483	1.85661	2.38615	1.10017	1	5.55512	4
514917	P53990	Protein KIAA0174 (Putative MAPK-activating protein PM28) - Homo sapiens (Human)	K0174_HUMAN	N	0.316927	3.40269	2.68703	6.6416	1.14651	1.26968	1	0.291225	1	3.51679	4
516916	O95139	NADH dehydrogenase [ubiquinone] 1 beta subcomplex subunit 6 (EC 1.6.5.3) (EC 1.6.99.3) (NADH-ubiquinone oxidoreductase B17 subunit) (Complex I-B17) (CI-B17) - Homo sapiens (Human)	NDUB6_HUMAN	Y	0.321262	3.40269	1	1	3.11483	4.38395	0.162036	4.10105	1	1	4
521170	P00734	Prothrombin precursor (EC 3.4.21.5) (Coagulation factor II) [Contains: Activation peptide fragment 1; Activation peptide fragment 2; Thrombin light chain; Thrombin heavy chain] - Homo sapiens (Human)	THRB_HUMAN	N	0.321896	2.42544	5.86785	1.14276	0.193584	0.502297	2.96219	1.7447	0.0297383	3.36785	4
514708	Q13349	Integrin alpha-D precursor (Leukointegrin alpha D) (ADB2) (CD11d antigen) - Homo sapiens (Human)	ITAD_HUMAN	Y	0.323006	1	1	2.33609	0.651217	10.7455	1	2.58718	1	7.59345	4
512885	P02771	Alpha-fetoprotein precursor (Alpha-fetoglobulin) (Alpha-1-fetoprotein) - Homo sapiens (Human)	FETA_HUMAN	N	0.323065	1.0429	26.586	0.851554	0.159276	2.3201	2.3032	14.0074	0.550159	1.21721	4
511905	Q9BTC0	Death-inducer obliterator 1 (DIO-1) (Death-associated transcription factor 1) (DATF-1) (hDido1) - Homo sapiens (Human)	DIDO1_HUMAN	N	0.326121	1.0429	0.993203	2.32481	0.907458	4.3125	3.17486	4.10105	1.05817	1.91288	4
522062	Q70J99	Unc-13 homolog D (Munc13-4) - Homo sapiens (Human)	UN13D_HUMAN	N	0.332676	0.974256	9.78258	13.5443	4.87428	4.3125	0.0540119	1.19433	0.452784	1	4
515389	Q05655	Protein kinase C delta type (EC 2.7.11.13) (nPKC-delta) - Homo sapiens (Human)	KPCD_HUMAN	N	0.338318	10.2081	4.89129	8.36474	4.62946	0.561603	0.201487	0.766237	0.876188	0.951269	4
513904	P22830	Ferrochelatase, mitochondrial precursor (EC 4.99.1.1) (Protoheme ferro-lyase) (Heme synthetase) - Homo sapiens (Human)	HEMH_HUMAN	N	0.342904	1.3785	1	0.858356	1.05964	0.146	2.30576	2.07028	7.18376	2.02634	4
514262	Q9H0U3	Implantation-associated protein precursor (IAP) (Magnesium transporter protein 1) (MagT1) - Homo sapiens (Human)	IAG2_HUMAN	Y	0.349595	3.12869	1.25969	1.24058	0.69546	0.417913	3.14907	2.15069	3.40227	0.219115	4
514773	O43299	Protein KIAA0415 (Fragment) - Homo sapiens (Human)	K0415_HUMAN	N	0.351487	1	1	1	0.542414	8.69645	3.02769	5.27978	3.66939	1	4
516593	P04220	Ig mu heavy chain disease protein (BOT) - Homo sapiens (Human)	MUCB_HUMAN	N	0.351513	2.18948	23.9729	0.761614	2.01678	1.1359	0.304744	0.196692	0.217528	2.06883	4
516314	Q9UHA4	Mitogen-activated protein kinase kinase 1-interacting protein 1 (MEK-binding partner 1) (Mp1) - Homo sapiens (Human)	MK1I1_HUMAN	N	0.354669	9.90216	0.827336	0.710585	0.6653	7.13951	2.41784	2.12593	1.33046	0.474828	4
519079	O95825	Quinone oxidoreductase-like 1 (EC 1.-.-.-) (QOH-1) (Zeta-crystallin homolog) (4P11) - Homo sapiens (Human)	QORL_HUMAN	N	0.355486	1	1	3.99672	3.11483	13.1518	0.223995	4.4419	0.696694	0.219115	4
522694	Q96QU8	Exportin-6 (Exp6) (Ran-binding protein 20) - Homo sapiens (Human)	XPO6_HUMAN	N	0.359399	1	5.92505	0.402608	0.440608	6.43303	3.32204	23.2375	1	0.25055	4
511548	P19784	Casein kinase II subunit alpha' (EC 2.7.11.1) (CK II) - Homo sapiens (Human)	CSK22_HUMAN	N	0.360207	0.507475	1.90858	2.62851	0.907458	4.38395	2.14487	0.817342	0.15697	3.51679	4
515425	P01613	Ig kappa chain V-I region Ni - Homo sapiens (Human)	KV1U_HUMAN	N	0.364107	4.79812	8.30699	1	3.11483	0.09767	3.32204	0.672881	1	1.79733	4
522542	Q13488	Vacuolar proton translocating ATPase 116 kDa subunit a isoform 3 (V-ATPase 116 kDa isoform a3) (Osteoclastic proton pump 116 kDa subunit) (OC-116 kDa) (OC116) (T-cell immune regulator 1) (T cell immune response cDNA7 protein) (TIRC7) -	VPP3_HUMAN	Y	0.367265	0.80848	49.5685	0.955837	0.795119	5.95421	0.170845	3.70302	1	3.65676	4
512294	P12724	Eosinophil cationic protein precursor (EC 3.1.27.-) (ECP) (Ribonuclease 3) (RNase 3) - Homo sapiens (Human)	ECP_HUMAN	N	0.367814	3.40269	11.8501	918.42	0.344331	1	12.5523	0.0313591	1	1	4
514596	O60573	Eukaryotic translation initiation factor 4E type 2 (eIF4E type 2) (eIF-4E type 2) (mRNA cap-binding protein type 3) (Eukaryotic translation initiation factor 4E-like 3) (Eukaryotic translation initiation factor 4E homologous protein) (	IF4E2_HUMAN	N	0.372649	1.47918	0.274675	3.99672	0.265425	4.3125	3.02769	0.873684	3.66939	1	4
509243	P15289	Arylsulfatase A precursor (EC 3.1.6.8) (ASA) (Cerebroside-sulfatase) [Contains: Arylsulfatase A component B; Arylsulfatase A component C] - Homo sapiens (Human)	ARSA_HUMAN	N	0.375166	0.246531	1.90858	1	2.72237	6.50448	3.11171	1	1	3.51679	4
522281	Q05086	Ubiquitin-protein ligase E3A (EC 6.3.2.-) (E6AP ubiquitin-protein ligase) (Oncogenic protein-associated protein E6-AP) (Human papillomavirus E6-associated protein) (NY-REN-54 antigen) - Homo sapiens (Human)	UBE3A_HUMAN	N	0.378691	0.891368	0.148256	3.99672	10.3659	0.619195	1.42231	0.52148	4.1993	7.03359	4
513382	P51570	Galactokinase (EC 2.7.1.6) (Galactose kinase) - Homo sapiens (Human)	GALK1_HUMAN	N	0.378706	2.31751	0.078828	7.99345	0.75647	2.11299	4.03157	0.646796	1.71358	0.560612	4
521011	Q86Y82	Syntaxin-12 - Homo sapiens (Human)	STX12_HUMAN	Y	0.380853	1	2.15628	0.626897	1.53589	8.55357	0.350404	10.9343	0.324888	2.6434	4
521556	O14773	Tripeptidyl-peptidase 1 precursor (EC 3.4.14.9) (Tripeptidyl-peptidase I) (TPP-I) (Tripeptidyl aminopeptidase) (Lysosomal pepstatin insensitive protease) (LPIC) (Cell growth-inhibiting gene 1 protein) - Homo sapiens (Human)	TPP1_HUMAN	N	0.386961	0.614461	3.92574	0.640627	0.678808	2.02337	2.60058	2.53866	0.676487	0.948769	4
515138	P22612	cAMP-dependent protein kinase, gamma-catalytic subunit (EC 2.7.11.11) (PKA C-gamma) - Homo sapiens (Human)	KAPCG_HUMAN	N	0.390817	6.80538	4.89129	3.99672	0.247047	0.85636	0.886795	1.34405	3.45207	1	4
516234	Q9UKD2	mRNA turnover protein 4 homolog - Homo sapiens (Human)	MRT4_HUMAN	N	0.393447	3.40269	5.92505	0.29084	4.9276	1	0.292684	0.0989938	0.266065	2.85381	4
510411	O14647	Chromodomain-helicase-DNA-binding protein 2 (EC 3.6.1.-) (ATP-dependent helicase CHD2) (CHD-2) - Homo sapiens (Human)	CHD2_HUMAN	N	0.400022	3.40269	1.57558	1	1	1	0.126926	4.10105	3.66939	2.6434	4
521559	P82094	TATA element modulatory factor (TMF) - Homo sapiens (Human)	TMF1_HUMAN	N	0.401864	1	4.89129	3.99672	0.868289	1	3.32204	0.145613	1	3.51679	4
519784	Q96T51	RUN and FYVE domain-containing protein 1 (FYVE-finger protein EIP1) (Zinc finger FYVE domain-containing protein 12) (La-binding protein 1) (Rab4-interacting protein) - Homo sapiens (Human)	RUFY1_HUMAN	N	0.402006	3.40269	3.15117	2.76897	0.910334	0.837753	9.08306	1.14131	0.813131	0.805522	4
521028	Q13277	Syntaxin-3 - Homo sapiens (Human)	STX3_HUMAN	N	0.40243	2.28007	1	6.6416	3.62555	4.24106	0.177104	0.30297	1	1	4
520290	O00241	Signal-regulatory protein beta-1 precursor (SIRP-beta-1) (CD172b antigen) - Homo sapiens (Human)	SIRB1_HUMAN	Y	0.411036	1	1	7.99345	3.11483	4.24106	1	4.4419	1	0.109558	4
518369	Q8TF05	Serine/threonine-protein phosphatase 4 regulatory subunit 1 - Homo sapiens (Human)	PP4R1_HUMAN	N	0.423105	1.24375	0.16106	3.99672	10.3659	1	2.45297	2.38866	0.140963	1.11895	4
510899	Q9NPA0	Uncharacterized protein C15orf24 precursor - Homo sapiens (Human)	CO024_HUMAN	Y	0.426956	1	0.0988372	0.987507	2.27022	6.50448	3.17486	1.63468	1	2.27297	4
510929	P02452	Collagen alpha-1(I) chain precursor - Homo sapiens (Human)	CO1A1_HUMAN	N	0.427561	1	9.78258	1	7.25111	0.0900611	3.02769	1	1	3.79672	4
513792	P04226	HLA class II histocompatibility antigen, DQ(2) alpha chain precursor - Homo sapiens (Human)	HA22_HUMAN	Y	0.431469	0.772503	17.2583	0.908097	1.35521	2.92748	3.17486	2.63832	1	0.854879	4
513461	Q8TBA6	Golgin subfamily A member 5 (Golgin-84) (RET-fused gene 5 protein) (Ret-II protein) - Homo sapiens (Human)	GOGA5_HUMAN	Y	0.432511	2.18698	1.1098	3.99672	0.413377	4.38395	2.47255	1.34576	1	0.671822	4
513079	P30273	High affinity immunoglobulin epsilon receptor gamma-subunit precursor (FceRI gamma) (IgE Fc receptor gamma-subunit) (Fc-epsilon RI-gamma) - Homo sapiens (Human)	FCERG_HUMAN	Y	0.432827	1	32.449	0.687029	0.830798	13.009	6.05538	6.21083	1	0.35035	4
513411	P52306	Rap1 GTPase-GDP dissociation stimulator 1 (SMG P21 stimulatory GDP/GTP exchange protein) (SMG GDS protein) (Exchange factor smgGDS) - Homo sapiens (Human)	GDS1_HUMAN	N	0.434117	0.470897	1	1	2.85652	8.55357	2.71275	1	0.281925	3.65676	4
515722	P80748	Ig lambda chain V-III region LOI - Homo sapiens (Human)	LV3B_HUMAN	N	0.434144	1	3.05391	0.473137	1	0.720637	3.32204	4.78274	1	3.51679	4
520492	P09012	U1 small nuclear ribonucleoprotein A (U1 snRNP protein A) (U1A protein) (U1-A) - Homo sapiens (Human)	SNRPA_HUMAN	N	0.436846	5.80175	0.222628	7.99345	0.826753	8.69645	2.7466	0.414165	0.30755	0.723077	4
513756	Q71DI3	Histone H3.2 (H3/m) (H3/o) - Homo sapiens (Human)	H32_HUMAN	N	0.448788	0.40984	0.635344	2.92133	0.432244	0.933521	1.56869	2.11017	14.5954	5.28229	4
521818	P49815	Tuberin (Tuberous sclerosis 2 protein) - Homo sapiens (Human)	TSC2_HUMAN	N	0.450758	1	1	1	3.62555	4.24106	3.02769	0.646796	0.217528	3.79672	4
508451	Q9Y2T4	Serine/threonine-protein phosphatase 2A 55 kDa regulatory subunit B gamma isoform (PP2A, subunit B, B-gamma isoform) (PP2A, subunit B, B55-gamma isoform) (PP2A, subunit B, PR55-gamma isoform) (PP2A, subunit B, R2-gamma isoform) (IMYPNO1	2ABG_HUMAN	N	0.452287	0.570017	1.57558	3.99672	1.16915	4.38395	0.929902	0.145613	2.14368	2.15356	4
513817	P01906	HLA class II histocompatibility antigen, DQ(6) alpha chain precursor (DX alpha chain) (HLA-DQA1) - Homo sapiens (Human)	HA26_HUMAN	Y	0.452935	0.772503	17.2583	0.745055	1.35521	2.92748	3.17486	2.63832	1	0.854879	4
518752	P24158	Myeloblastin precursor (EC 3.4.21.76) (Leukocyte proteinase 3) (PR-3) (PR3) (AGP7) (Wegener autoantigen) (P29) (C-ANCA antigen) (Neutrophil proteinase 4) (NP-4) - Homo sapiens (Human)	PRTN3_HUMAN	N	0.453754	2.53326	12.4829	1.7134	0.740751	0.927105	7.81152	1.22462	1	3.79672	4
514867	Q86X10	Protein KIAA1219 - Homo sapiens (Human)	K1219_HUMAN	N	0.455742	0.755689	0.16106	3.99672	2.48026	10.8884	0.377795	0.100316	0.150618	2.08812	4
513380	P54803	Galactocerebrosidase precursor (EC 3.2.1.46) (GALCERase) (Galactosylceramidase) (Galactosylceramide beta-galactosidase) (Galactocerebroside beta-galactosidase) - Homo sapiens (Human)	GALC_HUMAN	N	0.456929	3.40269	1	3.99672	0.562429	1.24882	1	4.10105	3.66939	1	4
514311	Q9UK76	Hematological and neurological expressed 1 protein (Androgen-regulated protein 2) - Homo sapiens (Human)	HN1_HUMAN	N	0.461501	2.3054	0.0856908	1.14725	2.61582	8.48212	3.56543	0.149973	1.94933	0.268072	4
508422	P11171	Protein 4.1 (Band 4.1) (P4.1) (EPB4.1) (4.1R) - Homo sapiens (Human)	41_HUMAN	N	0.476826	1	22.9786	0.774938	2.48026	0.0117042	1	4.78274	1	25.4573	4
514382	Q14197	Immature colon carcinoma transcript 1 protein precursor (Digestion substraction 1) (DS-1) - Homo sapiens (Human)	ICT1_HUMAN	N	0.491506	1.86181	0.274675	3.99672	3.62555	1	3.02769	0.30297	4.1993	0.649339	4
516961	O75251	NADH dehydrogenase [ubiquinone] iron-sulfur protein 7, mitochondrial precursor (EC 1.6.5.3) (EC 1.6.99.3) (NADH-ubiquinone oxidoreductase 20 kDa subunit) (Complex I-20kD) (CI-20kD) (PSST subunit) - Homo sapiens (Human)	NDUS7_HUMAN	N	0.493495	6.80538	0.0664787	0.987507	0.447266	0.083552	12.1108	1.93204	3.69542	2.37428	4
515601	P83111	Serine beta-lactamase-like protein LACTB - Homo sapiens (Human)	LACTB_HUMAN	N	0.500992	0.108677	20.5989	0.866402	0.643728	8.21693	0.457766	4.29937	4.1993	1.88635	4
518079	P53611	Geranylgeranyl transferase type-2 subunit beta (EC 2.5.1.60) (Geranylgeranyl transferase type II subunit beta) (Rab geranylgeranyltransferase subunit beta) (Rab geranyl-geranyltransferase subunit beta) (Rab GG transferase beta) (Rab GGT	PGTB_HUMAN	N	0.512173	1.0429	0.16106	4.64323	3.62555	4.38395	1	0.291225	1	3.51679	4
517893	O14737	Programmed cell death protein 5 (Protein TFAR19) (TF-1 cell apoptosis-related gene 19 protein) - Homo sapiens (Human)	PDCD5_HUMAN	N	0.514454	9.59624	0.148256	1.3862	4.27768	4.3125	0.389712	8.2021	0.966177	0.884478	4
512634	Q01469	Fatty acid-binding protein, epidermal (E-FABP) (Psoriasis-associated fatty acid-binding protein homolog) (PA-FABP) - Homo sapiens (Human)	FABPE_HUMAN	N	0.517733	1.34672	0.271189	0.777187	0.855686	3.02522	3.46379	5.868	3.66939	0.265105	4
520028	Q14108	Lysosome membrane protein 2 (Lysosome membrane protein II) (LIMP II) (Scavenger receptor class B member 2) (85 kDa lysosomal membrane sialoglycoprotein) (LGP85) (CD36 antigen-like 2) - Homo sapiens (Human)	SCRB2_HUMAN	Y	0.51853	0.891324	1.69456	0.688487	0.444558	3.15629	0.933117	2.47267	7.86869	2.40375	4
509820	P04003	C4b-binding protein alpha chain precursor (C4bp) (Proline-rich protein) (PRP) - Homo sapiens (Human)	C4BP_HUMAN	N	0.530038	10.2081	7.29546	1.78739	1.54849	0.0206752	7.63783	1.45583	1	8.92715	4
511742	Q8NBQ5	Dehydrogenase/reductase SDR family member 8 precursor (EC 1.1.1.-) (17-beta-hydroxysteroid dehydrogenase 11) (17-beta-HSD 11) (17-beta-HSD XI) (17betaHSDXI) (17bHSD11) (17betaHSD11) (Retinal short-chain dehydrogenase/reductase 2) (retS	DHRS8_HUMAN	N	0.531305	3.40269	2.68703	1.97864	0.530468	1.96876	2.7897	1.05492	2.90896	1.0123	4
509866	Q9Y5U8	Brain protein 44-like protein - Homo sapiens (Human)	BR44L_HUMAN	N	0.536669	0.431878	0.993203	4.64323	0.125774	4.24106	1.2276	8.2021	3.93434	0.11689	4
516332	Q99685	Monoglyceride lipase (EC 3.1.1.23) (MGL) (HU-K5) (Lysophospholipase homolog) (Lysophospholipase-like) - Homo sapiens (Human)	MGLL_HUMAN	N	0.537995	1	1	10.6383	5.23164	6.50448	0.747085	15.3762	1	0.951269	4
519194	Q13636	Ras-related protein Rab-31 (Rab-22B) - Homo sapiens (Human)	RAB31_HUMAN	N	0.538146	1	4.89129	0.807862	0.292288	12.7232	3.02769	4.10105	1	1	4
517162	O15118	Niemann-Pick C1 protein precursor - Homo sapiens (Human)	NPC1_HUMAN	Y	0.545967	1	5.40817	0.554548	0.89022	6.43303	3.02769	25.6288	0.281925	0.440566	4
518925	P51151	Ras-related protein Rab-9A (Rab-9) - Homo sapiens (Human)	RAB9A_HUMAN	N	0.546619	1	0.296512	1	1.82296	6.50448	0.489137	8.2021	3.66939	3.51679	4
509393	P00846	ATP synthase a chain (EC 3.6.3.14) (ATPase protein 6) - Homo sapiens (Human)	ATP6_HUMAN	N	0.551383	2.06132	5.53592	0.266809	0.6653	1.10732	0.770573	2.58753	2.67325	0.721183	4
518432	Q13427	Peptidyl-prolyl cis-trans isomerase G (EC 5.2.1.8) (Peptidyl-prolyl isomerase G) (PPIase G) (Rotamase G) (Cyclophilin G) (Clk-associating RS-cyclophilin) (CARS-cyclophilin) (CARS-Cyp) (SR-cyclophilin) (SRcyp) (SR-cyp) (CASP10) - Homo sa	PPIG_HUMAN	N	0.554539	3.40269	1	4.64323	0.687845	4.3125	0.700808	0.291225	4.1993	0.881132	4
516786	Q8IXH7	Negative elongation factor C/D (NELF-C/D) (TH1-like protein) - Homo sapiens (Human)	NELFD_HUMAN	N	0.557923	0.108677	0.665312	7.99345	3.11483	1	0.0976317	4.10105	0.0300935	2.74098	4
509801	Q9Y5P4	Goodpasture antigen-binding protein (EC 2.7.11.9) (GPBP) (Collagen type IV alpha-3-binding protein) (StAR-related lipid transfer protein 11) (StARD11) (START domain-containing protein 11) - Homo sapiens (Human)	C43BP_HUMAN	N	0.558985	0.80848	0.483441	10.5795	1.9092	21.5625	0.527832	3.31277	0.632325	2.01762	4
520885	Q8NBK3	Sulfatase-modifying factor 1 precursor (C-alpha-formyglycine-generating enzyme 1) - Homo sapiens (Human)	SUMF1_HUMAN	N	0.560183	0.20212	1	3.99672	3.11483	1	3.32204	1	16.7972	1	4
511314	P00395	Cytochrome c oxidase subunit 1 (EC 1.9.3.1) (Cytochrome c oxidase polypeptide I) - Homo sapiens (Human)	COX1_HUMAN	N	0.561447	0.217355	4.27195	3.99672	0.380327	1	0.13599	8.2021	6.03399	1	4
513479	P28676	Grancalcin - Homo sapiens (Human)	GRAN_HUMAN	N	0.566083	0.445622	5.92505	3.43988	1.0031	1.04952	9.37741	0.487718	3.66939	0.233781	4
512126	P23919	Thymidylate kinase (EC 2.7.4.9) (dTMP kinase) - Homo sapiens (Human)	DTYMK_HUMAN	N	0.574642	0.981627	5.40817	3.99672	0.95738	6.50448	0.711154	2.04961	0.905797	0.95798	4
512034	O75165	DnaJ homolog subfamily C member 13 (Required for receptor-mediated endocytosis 8) - Homo sapiens (Human)	DNJCD_HUMAN	N	0.575852	1.47918	1.74208	2.13026	0.683499	3.74796	3.45687	3.84363	0.15697	0.769543	4
515877	P61626	Lysozyme C precursor (EC 3.2.1.17) (1,4-beta-N-acetylmuramidase C) - Homo sapiens (Human)	LYSC_HUMAN	N	0.576743	2.49536	7.57674	1.04445	0.798016	2.00873	13.5208	0.709963	0.134758	0.913604	4
515466	Q96RT1	Protein LAP2 (Erbb2-interacting protein) (Erbin) (Densin-180-like protein) - Homo sapiens (Human)	LAP2_HUMAN	N	0.589267	3.40269	0.32212	3.99672	0.93408	4.3125	1	0.151485	3.66939	1.1363	4
518296	P42356	Phosphatidylinositol 4-kinase alpha (EC 2.7.1.67) (PI4-kinase alpha) (PtdIns-4-kinase alpha) (PI4K-alpha) - Homo sapiens (Human)	PI4KA_HUMAN	N	0.590097	0.182925	4.89129	3.13448	1.04101	2.51326	0.46514	0.261542	7.33878	0.6108	4
520243	Q96ST3	Paired amphipathic helix protein Sin3a (Transcriptional corepressor Sin3a) (Histone deacetylase complex subunit Sin3a) - Homo sapiens (Human)	SIN3A_HUMAN	N	0.601166	0.1188	2.97961	3.99672	6.22966	1	3.02769	1	0.159639	0.881132	4
513317	P32455	Interferon-induced guanylate-binding protein 1 (GTP-binding protein 1) (Guanine nucleotide-binding protein 1) (GBP-1) (HuGBP-1) - Homo sapiens (Human)	GBP1_HUMAN	N	0.60604	1.27289	1.74208	2.34091	2.50846	3.26325	0.361153	0.334388	3.34927	0.530441	4
511378	P39880	Homeobox protein cut-like 1 (CCAAT displacement protein) (CDP) - Homo sapiens (Human)	CUTL1_HUMAN	N	0.610937	1	0.385571	7.99345	3.62555	1	6.05538	1	0.252804	4.40566	4
516646	P22033	Methylmalonyl-CoA mutase, mitochondrial precursor (EC 5.4.99.2) (MCM) (Methylmalonyl-CoA isomerase) - Homo sapiens (Human)	MUTA_HUMAN	N	0.613213	0.0900098	2.82577	0.407258	7.25111	0.708698	0.668904	4.78274	18.8769	1.52751	4
510407	P41208	Centrin-2 (Caltractin isoform 1) - Homo sapiens (Human)	CETN2_HUMAN	N	0.617005	1.47918	0.0350476	7.99345	3.11483	4.38395	0.545376	0.425668	8.13364	1.70976	4
514000	P07305	Histone H1.0 (H1(0)) (Histone H1') - Homo sapiens (Human)	H10_HUMAN	N	0.619949	1.36936	0.317134	0.626897	8.80852	0.105967	30.2348	0.58274	35.939	3.93769	4
517846	Q8IWT3	p53-associated parkin-like cytoplasmic protein (UbcH7-associated protein 1) - Homo sapiens (Human)	PARC_HUMAN	N	0.621421	0.80848	0.203055	3.99672	10.1106	0.19534	0.678187	0.291225	3.93434	3.65676	4
518075	P05164	Myeloperoxidase precursor (EC 1.11.1.7) (MPO) [Contains: 89 kDa myeloperoxidase; 84 kDa myeloperoxidase; Myeloperoxidase light chain; Myeloperoxidase heavy chain] - Homo sapiens (Human)	PERM_HUMAN	N	0.624882	0.510522	41.8014	3.36706	0.672445	1.49522	41.7179	0.75545	1	4.65114	4
519657	P62070	Ras-related protein R-Ras2 (Ras-like protein TC21) (Teratocarcinoma oncogene) - Homo sapiens (Human)	RRAS2_HUMAN	N	0.62648	1	4.89129	1	3.37019	0.19534	4.83588	0.151485	4.1993	0.916201	4
511504	Q9H0L4	Cleavage stimulation factor 64 kDa subunit, tau variant (CSTF 64 kDa subunit, tau variant) (CF-1 64 kDa subunit, tau variant) (TauCstF-64) - Homo sapiens (Human)	CSTFT_HUMAN	N	0.628863	3.40269	0.325167	0.987507	2.96142	4.38395	2.7897	1.19433	0.108764	1.89894	4
519088	Q86U06	Probable RNA-binding protein 23 (RNA-binding motif protein 23) (RNA-binding region-containing protein 4) (Splicing factor SF2) - Homo sapiens (Human)	RBM23_HUMAN	N	0.639408	4.10041	0.525194	3.99672	7.25111	0.19534	3.32204	0.151485	1.19356	1.63317	4
518761	Q8WUA2	Peptidyl-prolyl cis-trans isomerase-like 4 (EC 5.2.1.8) (PPIase) (Rotamase) (Cyclophilin-like protein PPIL4) - Homo sapiens (Human)	PPIL4_HUMAN	N	0.642023	4.79812	0.510498	3.99672	2.80224	1	0.20173	0.291225	0.217528	3.65676	4
519371	Q6WKZ4	Rab11 family-interacting protein 1 (Rab11-FIP1) (Rab-coupling protein) - Homo sapiens (Human)	RFIP1_HUMAN	N	0.649041	0.2376	0.0527671	3.99672	1.26954	4.24106	2.38048	0.151485	1	5.41515	4
515918	Q9UK45	U6 snRNA-associated Sm-like protein LSm7 - Homo sapiens (Human)	LSM7_HUMAN	N	0.656739	0.1188	4.35097	3.99672	3.1185	4.38395	0.443397	0.621248	0.517246	0.770582	4
509519	P02730	Band 3 anion transport protein (Anion exchange protein 1) (AE 1) (Solute carrier family 4 member 1) (CD233 antigen) - Homo sapiens (Human)	B3AT_HUMAN	Y	0.661089	1	23.5105	0.175674	2.27038	0.0456753	0.534444	0.145613	7.33878	23.1888	4
520034	O95295	SNARE-associated protein Snapin (Synaptosomal-associated protein 25-binding protein) (SNAP-associated protein) - Homo sapiens (Human)	S25BP_HUMAN	N	0.667544	3.40269	0.496601	3.48722	0.088475	4.38395	3.17486	1.29359	1	1.79733	4
518368	P60510	Serine/threonine-protein phosphatase 4 catalytic subunit (EC 3.1.3.16) (PP4C) (Pp4) (Protein phosphatase X) (PP-X) - Homo sapiens (Human)	PP4C_HUMAN	N	0.670892	4.0424	0.107373	7.99345	2.20244	1	1.6381	0.199301	0.093975	2.08812	4
520838	P12931	Proto-oncogene tyrosine-protein kinase Src (EC 2.7.10.2) (p60-Src) (c-Src) (pp60c-src) - Homo sapiens (Human)	SRC_HUMAN	N	0.67465	0.80848	3.15117	1.16241	2.72237	6.50448	0.325468	8.88379	0.17708	1.90254	4
521609	Q15388	Mitochondrial import receptor subunit TOM20 homolog (Mitochondrial 20 kDa outer membrane protein) (Outer mitochondrial membrane receptor Tom20) - Homo sapiens (Human)	TOM20_HUMAN	Y	0.675034	14.7003	0.0856908	1.07803	3.17891	4.38395	0.318545	0.755941	3.84482	1.12122	4
520511	Q9H2G2	STE20-like serine/threonine-protein kinase (EC 2.7.11.1) (STE20-like kinase) (STE20-related serine/threonine-protein kinase) (STE20-related kinase) (hSLK) (Serine/threonine-protein kinase 2) (CTCL tumor antigen se20-9) - Homo sapiens (Hu	SLK_HUMAN	N	0.676098	1.47918	0.993203	2.70088	4.7427	6.43303	2.10049	0.534923	1.10919	0.0835167	4
509447	P00966	Argininosuccinate synthase (EC 6.3.4.5) (Citrulline--aspartate ligase) - Homo sapiens (Human)	ASSY_HUMAN	N	0.684603	0.884371	1.4848	0.249617	2.23814	2.11707	2.69476	0.854389	2.6101	0.669353	4
516516	Q9BV57	1,2-dihydroxy-3-keto-5-methylthiopentene dioxygenase (EC 1.13.-.-) (Aci-reductone dioxygenase) (ARD) (Membrane-type 1 matrix metalloproteinase cytoplasmic tail-binding protein 1) (MTCBP-1) (Submergence-induced protein 2 homolog) (SIPL)	MTND_HUMAN	N	0.684628	6.80538	0.496601	1	2.0769	4.38395	0.856456	0.145613	2.06898	0.770582	4
509762	P00736	Complement C1r subcomponent precursor (EC 3.4.21.41) (Complement component 1, r subcomponent) [Contains: Complement C1r subcomponent heavy chain; Complement C1r subcomponent light chain] - Homo sapiens (Human)	C1R_HUMAN	N	0.687832	1	12.7451	0.29084	6.22966	0.285453	3.02769	0.30297	1	3.79672	4
519212	O43353	Receptor-interacting serine/threonine-protein kinase 2 (EC 2.7.11.1) (RIP-like-interacting CLARP kinase) (Receptor-interacting protein 2) (RIP-2) (CARD-containing interleukin-1 beta-converting enzyme-associated kinase) (CARD-containing	RIPK2_HUMAN	N	0.69463	0.673564	0.296512	6.6416	0.250295	1	2.03355	0.30297	4.1993	3.79672	4
515244	Q6GTX8	Leukocyte-associated immunoglobulin-like receptor 1 precursor (LAIR-1) (hLAIR1) (CD305 antigen) - Homo sapiens (Human)	LAIR1_HUMAN	Y	0.694774	1	7.85382	0.987507	0.458563	4.3125	3.32204	6.83327	1	1	4
508795	O95394	Phosphoacetylglucosamine mutase (EC 5.4.2.3) (PAGM) (Acetylglucosamine phosphomutase) (N-acetylglucosamine-phosphate mutase) (Phosphoglucomutase 3) - Homo sapiens (Human)	AGM1_HUMAN	N	0.697241	0.715588	0.227297	3.99672	0.810899	8.48212	2.94448	0.30297	2.16839	0.916201	4
519124	P52756	RNA-binding protein 5 (RNA-binding motif protein 5) (Tumor suppressor LUCA15) (Protein G15) (NY-REN-9 antigen) - Homo sapiens (Human)	RBM5_HUMAN	N	0.7086	0.217355	0.124545	3.99672	7.25111	1	1	4.10105	0.591944	10.5504	4
509432	Q9NVI7	ATPase family AAA domain-containing protein 3A - Homo sapiens (Human)	ATD3A_HUMAN	N	0.711294	1.2829	0.496601	3.99672	0.498254	4.24106	0.652526	0.427534	2.96517	2.4794	4
523040	Q9Y508	Zinc finger protein 313 (RING finger protein 114) - Homo sapiens (Human)	ZN313_HUMAN	N	0.713723	6.49946	0.101528	1.14725	2.53063	1	0.587134	2.48792	2.21838	0.801251	4
514356	P54105	Methylosome subunit pICln (Chloride conductance regulatory protein ICln) (I(Cln)) (Chloride channel, nucleotide sensitive 1A) (Chloride ion current inducer protein) (ClCI) (Reticulocyte pICln) - Homo sapiens (Human)	ICLN_HUMAN	N	0.724575	18.103	0.0378155	9.28647	0.779626	8.76789	0.134572	0.0753626	4.73589	0.475635	4
509586	P15291	Beta-1,4-galactosyltransferase 1 (EC 2.4.1.-) (Beta-1,4-GalTase 1) (Beta4Gal-T1) (b4Gal-T1) (UDP-galactose:beta-N-acetylglucosamine beta-1,4-galactosyltransferase 1) (UDP-Gal:beta-GlcNAc beta-1,4-galactosyltransferase 1) [Includes: Lac	B4GT1_HUMAN	Y	0.72626	2.31751	5.92505	0.316119	0.5304	6.43303	0.687813	4.26116	0.287993	1	4
512827	O60645	Exocyst complex component 3 (Exocyst complex component Sec6) - Homo sapiens (Human)	EXOC3_HUMAN	N	0.733773	0.2376	1	3.99672	3.37019	1	3.32204	0.414165	2.06898	1	4
515912	O15116	U6 snRNA-associated Sm-like protein LSm1 (Small nuclear ribonuclear CaSm) (Cancer-associated Sm-like) - Homo sapiens (Human)	LSM1_HUMAN	N	0.764793	0.2376	0.32212	3.99672	3.11483	4.38395	0.678187	0.696427	0.743612	3.79672	4
518541	Q9NVS9	Pyridoxine-5'-phosphate oxidase (EC 1.4.3.5) (Pyridoxamine-phosphate oxidase) - Homo sapiens (Human)	PNPO_HUMAN	N	0.768668	0.737777	0.530054	0.728304	6.99574	4.3125	10.8913	0.808545	2.14072	0.995674	4
513868	Q8N3C0	Activating signal cointegrator 1 complex subunit 3 (EC 3.6.1.-) (ASC-1 complex subunit p200) (Trip4 complex subunit p200) (Helicase, ATP binding 1) - Homo sapiens (Human)	HELC1_HUMAN	N	0.770418	0.149139	1	3.99672	2.37327	1	0.619934	6.49242	0.134758	3.51679	4
513821	P42858	Huntingtin (Huntington disease protein) (HD protein) - Homo sapiens (Human)	HD_HUMAN	N	0.788334	0.674293	0.32212	7.99345	0.993415	25.875	2.40464	0.454964	0.134758	3.65676	4
512429	P08246	Leukocyte elastase precursor (EC 3.4.21.37) (Elastase-2) (Neutrophil elastase) (PMN elastase) (Bone marrow serine protease) (Medullasin) (Human leukocyte elastase) (HLE) - Homo sapiens (Human)	ELNE_HUMAN	Y	0.793686	0.905514	24.0783	2.00823	0.468058	1.07857	7.57778	0.579252	0.217528	13.0086	4
510325	P21127	PITSLRE serine/threonine-protein kinase CDC2L1 (EC 2.7.11.22) (Galactosyltransferase-associated protein kinase p58/GTA) (Cell division cycle 2-like protein kinase 1) (CLK-1) (CDK11) (p58 CLK-1) - Homo sapiens (Human)	CD2L1_HUMAN	N	0.821507	4.10041	5.92505	7.99345	0.481156	4.24106	1.3733	0.291225	0.235749	0.881132	4
516814	Q9BZQ8	Niban protein - Homo sapiens (Human)	NIBA_HUMAN	N	0.836736	1	1.57558	3.31602	1.70943	0.324185	3.02769	14.3482	1	10.5504	4
520630	Q13188	Serine/threonine-protein kinase 3 (EC 2.7.11.1) (STE20-like kinase MST2) (MST-2) (Mammalian STE20-like protein kinase 2) (Serine/threonine-protein kinase Krs-1) - Homo sapiens (Human)	STK3_HUMAN	N	0.859886	1.64148	0.0536867	14.635	3.37019	2.48535	0.402974	0.567539	0.17708	3.51679	4
511924	Q96GQ7	Probable ATP-dependent RNA helicase DDX27 (EC 3.6.1.-) (DEAD box protein 27) - Homo sapiens (Human)	DDX27_HUMAN	N	0.867426	1.06319	0.84329	3.99672	4.9276	4.24106	0.543526	2.43587	0.4614	0.679916	4
520264	Q15047	Histone-lysine N-methyltransferase, H3 lysine-9 specific 4 (EC 2.1.1.43) (Histone H3-K9 methyltransferase 4) (H3-K9-HMTase 4) (SET domain bifurcated 1) (ERG-associated protein with SET domain) (ESET) - Homo sapiens (Human)	SETB1_HUMAN	N	0.876796	1	0.32212	1	1.06733	4.24106	3.02769	4.78274	0.093975	3.51679	4
516885	P61601	Neurocalcin delta - Homo sapiens (Human)	NCALD_HUMAN	N	0.877094	2.51853	0.148256	3.99672	3.62555	1	0.2983	1.43456	5.77004	0.25055	4
522723	O75152	Zinc finger CCCH domain-containing protein 11A - Homo sapiens (Human)	ZC11A_HUMAN	N	0.877724	1	0.630233	5.28975	3.11483	4.24106	0.223995	0.291225	3.66939	1.05514	4
518034	Q9NVE7	Pantothenate kinase 4 (EC 2.7.1.33) (Pantothenic acid kinase 4) (hPanK4) - Homo sapiens (Human)	PANK4_HUMAN	N	0.878401	2.21878	1	3.99672	0.413377	4.3125	2.26009	0.296981	0.324888	0.881132	4
520212	Q6IA17	Single Ig IL-1-related receptor (Single Ig IL-1R-related molecule) (Single immunoglobulin domain-containing IL1R-related protein) (Toll/interleukin-1 receptor 8) (TIR8) - Homo sapiens (Human)	SIGIR_HUMAN	Y	0.884598	1	4.89129	5.28975	0.389813	0.85636	0.292895	0.151485	3.66939	3.51679	4
516734	Q00653	Nuclear factor NF-kappa-B p100 subunit (DNA-binding factor KBF2) (H2TF1) (Lymphocyte translocation chromosome 10) (Oncogene Lyt-10) (Lyt10) [Contains: Nuclear factor NF-kappa-B p52 subunit] - Homo sapiens (Human)	NFKB2_HUMAN	N	0.885353	1.70341	2.90065	11.9313	3.23253	0.91023	3.32204	0.516521	0.642925	1	4
520981	Q8WXH0	Nesprin-2 (Nuclear envelope spectrin repeat protein 2) (Syne-2) (Synaptic nuclear envelope protein 2) (Nucleus and actin connecting element protein) (Protein NUANCE) - Homo sapiens (Human)	SYNE2_HUMAN	N	0.890927	0.257501	9.78258	1	0.61669	4.61229	0.830642	0.30297	2.36805	6.5586	4
513745	Q08379	Golgin subfamily A member 2 (Cis-Golgi matrix protein GM130) (Gm130 autoantigen) (Golgin-95) - Homo sapiens (Human)	GOGA2_HUMAN	N	0.903578	4.79812	0.57105	3.48722	0.257638	1	6.34973	0.0983458	0.517246	3.51679	4
509387	Q8NBU5	ATPase family AAA domain-containing protein 1 - Homo sapiens (Human)	ATAD1_HUMAN	N	0.907224	4.79812	0.0988372	5.28975	0.257638	4.24106	1	0.30297	2.81032	0.499694	4
521470	Q12888	Tumor suppressor p53-binding protein 1 (p53-binding protein 1) (p53BP1) (53BP1) - Homo sapiens (Human)	TP53B_HUMAN	N	0.910884	2.00063	2.9253	0.8205	3.37019	1	5.85038	0.045759	0.640939	1.31211	4
511716	O95786	Probable ATP-dependent RNA helicase DDX58 (EC 3.6.1.-) (DEAD-box protein 58) (Retinoic acid-inducible gene 1 protein) (RIG-1) (RIG-I) - Homo sapiens (Human)	DDX58_HUMAN	N	0.911033	0.891324	1	3.99672	1.29727	0.85742	2.71275	0.0983458	4.1993	3.79672	4
516307	P52701	DNA mismatch repair protein MSH6 (MutS-alpha 160 kDa subunit) (G/T mismatch-binding protein) (GTBP) (GTMBP) (p160) - Homo sapiens (Human)	MSH6_HUMAN	N	0.928181	0.1188	0.609188	5.28975	1.80237	4.24106	2.62867	0.0983458	0.304489	3.65676	4
522423	Q8TAF3	WD repeat protein 48 (WD repeat endosomal protein) (p80) - Homo sapiens (Human)	WDR48_HUMAN	N	0.928712	1	0.296512	5.28975	5.18297	4.38395	0.350404	0.196692	0.554595	3.79672	4
518834	P20962	Parathymosin - Homo sapiens (Human)	PTMS_HUMAN	N	0.935471	2.18329	0.362581	0.462435	3.62555	4.24106	0.787268	4.78274	0.683906	0.291462	4
513884	P13716	Delta-aminolevulinic acid dehydratase (EC 4.2.1.24) (Porphobilinogen synthase) (ALADH) - Homo sapiens (Human)	HEM2_HUMAN	N	0.954062	1	1.57558	0.29084	8.04243	0.190977	3.02769	1	3.66939	3.51679	4
519057	Q6NZI2	Polymerase I and transcript release factor (PTRF protein) - Homo sapiens (Human)	PTRF_HUMAN	N	0.956593	1	1	3.44174	0.265425	0.13057	4.83588	1	3.93434	11.3902	4
515927	P15529	Membrane cofactor protein precursor (Trophoblast leukocyte common antigen) (TLX) (CD46 antigen) - Homo sapiens (Human)	MCP_HUMAN	Y	0.956742	3.40269	0.16106	3.99672	7.25111	0.309598	0.253853	0.30297	7.33878	1	4
513237	O75879	Probable glutamyl-tRNA(Gln) amidotransferase subunit B, mitochondrial precursor (EC 6.3.5.-) (Glu-ADT subunit B) (Cytochrome oxidase assembly factor PET112 homolog) - Homo sapiens (Human)	GATB_HUMAN	N	0.970033	0.0724517	3.15117	1	0.265425	1	3.17486	2.89806	0.324888	2.51934	4
519705	O00442	RNA 3'-terminal phosphate cyclase (EC 6.5.1.4) (RNA-3'-phosphate cyclase) (RNA cyclase) - Homo sapiens (Human)	RTC1_HUMAN	N	0.972183	2.02021	0.651797	0.29084	2.47329	3.78384	0.244223	0.561495	1.17616	3.00844	4
516562	Q6N069	NMDA receptor-regulated 1-like protein (NARG1-like protein) - Homo sapiens (Human)	NARGL_HUMAN	N	0.972465	7.5031	0.32212	4.64323	0.962312	4.24106	1.29413	0.358641	0.0976156	3.51679	4
509968	Q7L1Q6	Basic leucine zipper and W2 domain-containing protein 1 (Protein Orf) - Homo sapiens (Human)	BZW1_HUMAN	N	0.97632	2.15228	0.08053	3.99672	1.03845	4.38395	0.225968	1.61328	2.88502	0.770582	4
508907	Q9HCF4	Protein ALO17 (ALK lymphoma oligomerization partner on chromosome 17) - Homo sapiens (Human)	ALO17_HUMAN	N	0.992156	1.63084	9.78258	8.63996	5.75717	0.939223	0.36235	0.71034	0.743612	2.56738	4
523216	O15231	Zinc finger protein 185 (LIM-domain protein ZNF185) (P1-A) - Homo sapiens (Human)	ZN185_HUMAN	N	0.997708	1.41618	0.374462	4.64323	3.9402	2.51326	0.606777	0.556643	1.32343	2.87	4
513752	P57053	Histone H2B type F-S (H2B.s) (H2B/s) - Homo sapiens (Human)	H2BFS_HUMAN	N	0.00563703	0.876732	2.21334	1.64964	0.841543	1.10691	1.1916	1.76941	3.45047	2.09179	3
514051	P62807	Histone H2B type 1-C/E/F/G/I (H2B.a/g/h/k/l) (H2B.1 A) (H2B/a) (H2B/g) (H2B/h) (H2B/k) (H2B/l) - Homo sapiens (Human)	H2B1C_HUMAN	N	0.00563703	0.876732	2.21334	1.64964	0.841543	1.10691	1.1916	1.76941	3.45047	2.09179	3
514055	O60814	Histone H2B type 1-K (H2B K) (HIRA-interacting protein 1) - Homo sapiens (Human)	H2B1K_HUMAN	N	0.00563703	0.876732	2.21334	1.64964	0.841543	1.10691	1.1916	1.76941	3.45047	2.09179	3
513749	Q5QNW6	Histone H2B type 2-F - Homo sapiens (Human)	H2B2F_HUMAN	N	0.00566102	0.876732	2.20453	1.64964	0.841543	1.10691	1.1916	1.76941	3.45047	2.09179	3
514052	P58876	Histone H2B type 1-D (H2B.b) (H2B/b) (H2B.1 B) (HIRA-interacting protein 2) - Homo sapiens (Human)	H2B1D_HUMAN	N	0.00566102	0.876732	2.20453	1.64964	0.841543	1.10691	1.1916	1.76941	3.45047	2.09179	3
514053	Q93079	Histone H2B type 1-H (H2B.j) (H2B/j) - Homo sapiens (Human)	H2B1H_HUMAN	N	0.00566102	0.876732	2.20453	1.64964	0.841543	1.10691	1.1916	1.76941	3.45047	2.09179	3
514057	Q99879	Histone H2B type 1-M (H2B.e) (H2B/e) - Homo sapiens (Human)	H2B1M_HUMAN	N	0.00566102	0.876732	2.20453	1.64964	0.841543	1.10691	1.1916	1.76941	3.45047	2.09179	3
514058	Q99877	Histone H2B type 1-N (H2B.d) (H2B/d) - Homo sapiens (Human)	H2B1N_HUMAN	N	0.00566102	0.876732	2.20453	1.64964	0.841543	1.10691	1.1916	1.76941	3.45047	2.09179	3
514056	Q99880	Histone H2B type 1-L (H2B.c) (H2B/c) - Homo sapiens (Human)	H2B1L_HUMAN	N	0.00575815	0.874016	2.21475	1.64964	0.841543	1.10691	1.1916	1.76941	3.45047	2.08133	3
509440	O15145	Actin-related protein 2/3 complex subunit 3 (ARP2/3 complex 21 kDa subunit) (p21-ARC) - Homo sapiens (Human)	ARPC3_HUMAN	N	0.0089317	1.39263	1.90882	2.271	1.16462	2.84491	0.870623	1.7517	1.26288	2.73776	3
513750	Q8N257	Histone H2B type 3-B (H2B type 12) - Homo sapiens (Human)	H2B3B_HUMAN	N	0.0101717	0.910771	2.55734	1.67426	0.824863	1.03697	1.13792	1.7266	3.88777	2.16004	3
513748	Q16778	Histone H2B type 2-E (H2B.q) (H2B/q) (H2B-GL105) - Homo sapiens (Human)	H2B2E_HUMAN	N	0.0101752	0.910079	2.55388	1.67426	0.824863	1.03159	1.13792	1.73317	3.89951	2.18477	3
514054	P06899	Histone H2B type 1-J (H2B.r) (H2B/r) (H2B.1) - Homo sapiens (Human)	H2B1J_HUMAN	N	0.0101752	0.910079	2.55388	1.67426	0.824863	1.03159	1.13792	1.73317	3.89951	2.18477	3
514050	P33778	Histone H2B type 1-B (H2B.f) (H2B/f) (H2B.1) - Homo sapiens (Human)	H2B1B_HUMAN	N	0.0102003	0.910079	2.5437	1.67426	0.824863	1.03159	1.13792	1.73317	3.89951	2.18477	3
514059	P23527	Histone H2B type 1-O (H2B.n) (H2B/n) (H2B.2) - Homo sapiens (Human)	H2B1O_HUMAN	N	0.0102003	0.910079	2.5437	1.67426	0.824863	1.03159	1.13792	1.73317	3.89951	2.18477	3
509438	Q6RW13	Type-1 angiotensin II receptor-associated protein (AT1 receptor-associated protein) - Homo sapiens (Human)	ATRAP_HUMAN	Y	0.0117759	1.61696	2.68703	9.93298	1.08483	1.68481	1.6119	0.978216	3.93434	1.74877	3
515783	Q32MZ4	Leucine-rich repeat flightless-interacting protein 1 (LRR FLII-interacting protein 1) (TAR RNA-interacting protein) (GC-binding factor 2) - Homo sapiens (Human)	LRRF1_HUMAN	N	0.0130983	1.52136	1.11782	4.80582	2.22156	2.23806	1.28794	1.9166	1.27611	1.27544	3
514049	Q96A08	Histone H2B type 1-A (Histone H2B, testis) (Testis-specific histone H2B) - Homo sapiens (Human)	H2B1A_HUMAN	N	0.0244214	1.37103	1.30279	2.76284	0.475951	1.11165	1.05696	1.87678	3.60689	2.46843	3
522397	P61421	Vacuolar ATP synthase subunit d (EC 3.6.3.14) (V-ATPase d subunit) (Vacuolar proton pump subunit d) (V-ATPase AC39 subunit) (V-ATPase 40 kDa accessory protein) (P39) (32 kDa accessory protein) - Homo sapiens (Human)	VA0D_HUMAN	N	0.0289652	1.33687	34.7559	0.515675	1.54552	36.692	1.595	8.11742	1	1.18585	3
518465	P10619	Lysosomal protective protein precursor (EC 3.4.16.5) (Cathepsin A) (Carboxypeptidase C) (Protective protein for beta-galactosidase) [Contains: Lysosomal protective protein 32 kDa chain; Lysosomal protective protein 20 kDa chain] - Homo	PPGB_HUMAN	N	0.0479862	0.782985	2.99494	0.760262	0.977344	5.93724	1.38295	1.73639	1.53529	5.09133	3
518901	P51148	Ras-related protein Rab-5C (RAB5L) (L1880) - Homo sapiens (Human)	RAB5C_HUMAN	N	0.051083	0.814126	3.51035	1.47676	1.55229	4.83306	1.59322	7.9713	1.25671	0.826152	3
520578	Q9UNH7	Sorting nexin-6 (TRAF4-associated factor 2) - Homo sapiens (Human)	SNX6_HUMAN	N	0.0577677	0.777505	0.815318	2.60521	1.36312	3.12205	2.07467	1.38691	1.56009	1.77109	3
511282	Q14019	Coactosin-like protein - Homo sapiens (Human)	COTL1_HUMAN	N	0.0581826	2.56603	1.69363	3.63537	1.78978	15.471	0.9296	1.88258	0.649775	1.69378	3
511399	Q86UF2	Protein cTAGE-6 (cTAGE family member 6) - Homo sapiens (Human)	CTGE6_HUMAN	N	0.0633136	1	1	3.99672	3.62555	1	1	1	1	3.51679	3
512953	P21462	fMet-Leu-Phe receptor (fMLP receptor) (N-formyl peptide receptor) (FPR) (N-formylpeptide chemoattractant receptor) - Homo sapiens (Human)	FPR1_HUMAN	Y	0.0634051	1	4.89129	1	4.9276	4.3125	1	1	1	1	3
522760	Q8N8U3	Zinc finger CCHC domain-containing protein 5 - Homo sapiens (Human)	ZCHC5_HUMAN	N	0.0637913	3.40269	1	1	1	1	1	4.10105	1	3.79672	3
520253	Q9H788	SH2 domain-containing protein 4A (Protein SH(2)A) - Homo sapiens (Human)	SH24A_HUMAN	N	0.06405	1	1	1	1	1	4.68871	4.78274	3.93434	1	3
508857	P30838	Aldehyde dehydrogenase, dimeric NADP-preferring (EC 1.2.1.5) (ALDH class 3) (ALDHIII) - Homo sapiens (Human)	AL3A1_HUMAN	N	0.0644134	1	1	4.64323	1	1	1	4.10105	3.66939	1	3
520179	P15907	CMP-N-acetylneuraminate-beta-galactosamide-alpha-2,6-sialyltransferase (EC 2.4.99.1) (Beta-galactoside alpha-2,6-sialyltransferase) (Alpha 2,6-ST) (Sialyltransferase 1) (ST6Gal I) (B-cell antigen CD75) - Homo sapiens (Human)	SIAT1_HUMAN	N	0.0647182	3.40269	1	1	3.37019	1	1	1	4.1993	1	3
515118	P31321	cAMP-dependent protein kinase type I-beta regulatory subunit - Homo sapiens (Human)	KAP1_HUMAN	N	0.0649964	1	1	1	3.62555	4.3125	1	4.78274	1	1	3
514884	Q9NZM3	Intersectin-2 (SH3 domain-containing protein 1B) (SH3P18) (SH3P18-like WASP-associated protein) - Homo sapiens (Human)	ITSN2_HUMAN	N	0.065151	1	1	1	3.37019	4.24106	3.32204	1	1	1	3
522041	Q9Y5T5	Ubiquitin carboxyl-terminal hydrolase 16 (EC 3.1.2.15) (Ubiquitin thioesterase 16) (Ubiquitin-specific-processing protease 16) (Deubiquitinating enzyme 16) (Ubiquitin-processing protease UBP-M) - Homo sapiens (Human)	UBP16_HUMAN	N	0.0660477	1	1	1	1	4.24106	3.02769	1	3.66939	1	3
513206	Q9UG22	GTPase, IMAP family member 2 (Immunity-associated protein 2) (hIMAP2) - Homo sapiens (Human)	GIMA2_HUMAN	Y	0.06629	1	5.92505	1	1	4.24106	1	4.78274	1	1	3
511667	Q15438	Cytohesin-1 (SEC7 homolog B2-1) - Homo sapiens (Human)	CYH1_HUMAN	N	0.0667636	1	4.89129	1	3.37019	4.38395	1	1	1	1	3
521589	Q5JTV8	Torsin-1A-interacting protein 1 - Homo sapiens (Human)	TOIP1_HUMAN	N	0.0673686	0.645919	3.22054	1.71449	0.685396	1.21732	1.71547	2.08315	2.41969	1.95236	3
508617	Q9NQ94	APOBEC1 complementation factor (APOBEC1-stimulating protein) - Homo sapiens (Human)	ACF_HUMAN	N	0.067738	1	1	5.28975	6.22966	1	1	4.10105	1	1	3
509653	P54252	Ataxin-3 (EC 3.4.22.-) (Machado-Joseph disease protein 1) (Spinocerebellar ataxia type 3 protein) - Homo sapiens (Human)	ATX3_HUMAN	N	0.0680125	3.40269	4.89129	1	1	1	1	1	1	3.51679	3
516103	Q15555	Microtubule-associated protein RP/EB family member 2 (APC-binding protein EB2) (End-binding protein 2) (EB2) - Homo sapiens (Human)	MARE2_HUMAN	N	0.0686069	1	4.89129	3.99672	3.11483	1	1	1	1	1	3
512786	Q96MK3	Protein FAM20A precursor - Homo sapiens (Human)	FA20A_HUMAN	Y	0.0689697	1	1	1	3.11483	1	1	4.78274	1	3.51679	3
513653	P04899	Guanine nucleotide-binding protein G(i), alpha-2 subunit (Adenylate cyclase-inhibiting G alpha protein) - Homo sapiens (Human)	GNAI2_HUMAN	N	0.0695816	1.07262	23.7013	1.58396	0.86358	3.00634	1.02725	2.49583	0.766246	1.2685	3
513183	Q96CW5	Gamma-tubulin complex component 3 (GCP-3) (Spindle pole body protein Spc98 homolog) (hSpc98) (hGCP3) (h104p) - Homo sapiens (Human)	GCP3_HUMAN	N	0.0697411	4.79812	1	1	3.37019	1	1	1	1	5.55512	3
518334	O75925	Protein inhibitor of activated STAT protein 1 (Gu-binding protein) (GBP) (RNA helicase II-binding protein) (DEAD/H box-binding protein 1) - Homo sapiens (Human)	PIAS1_HUMAN	N	0.0703137	3.40269	1	1	1	1	1	4.10105	1	5.55512	3
509593	Q13075	Baculoviral IAP repeat-containing protein 1 (Neuronal apoptosis inhibitory protein) - Homo sapiens (Human)	BIRC1_HUMAN	N	0.0706912	1	4.89129	5.28975	1.72129	1	1	6.49242	1	1	3
509149	Q01432	AMP deaminase 3 (EC 3.5.4.6) (AMP deaminase isoform E) (Erythrocyte AMP deaminase) - Homo sapiens (Human)	AMPD3_HUMAN	N	0.0727053	1	1	11.2848	6.22966	8.69645	1	1	1	1	3
519183	P20936	Ras GTPase-activating protein 1 (GTPase-activating protein) (GAP) (Ras p21 protein activator) (p120GAP) (RasGAP) - Homo sapiens (Human)	RASA1_HUMAN	N	0.0742504	1	1	1	6.22966	1	6.64408	1	1	3.51679	3
510771	Q99439	Calponin-2 (Calponin H2, smooth muscle) (Neutral calponin) - Homo sapiens (Human)	CNN2_HUMAN	N	0.0749989	2.89866	0.260365	6.55833	1.67249	5.73305	0.769688	0.529759	1.95679	0.971822	3
515967	Q9UIS9	Methyl-CpG-binding domain protein 1 (Methyl-CpG-binding protein MBD1) (Protein containing methyl-CpG-binding domain 1) - Homo sapiens (Human)	MBD1_HUMAN	N	0.0754193	1	1	1	3.62555	1	6.05538	1	1	3.51679	3
515688	P01700	Ig lambda chain V-I region HA - Homo sapiens (Human)	LV1B_HUMAN	N	0.076453	1	1.60358	4.64323	1	4.3125	1	4.78274	1	1	3
515692	P04208	Ig lambda chain V-I region WAH - Homo sapiens (Human)	LV1F_HUMAN	N	0.076453	1	1.60358	4.64323	1	4.3125	1	4.78274	1	1	3
520189	Q14141	Septin-6 - Homo sapiens (Human)	SEPT6_HUMAN	N	0.0765297	1.5068	1.09816	54.4258	1.53248	5.98666	2.10414	0.950308	0.423416	0.598066	3
514582	Q14005	Interleukin-16 precursor (IL-16) (Lymphocyte chemoattractant factor) (LCF) - Homo sapiens (Human)	IL16_HUMAN	N	0.0778999	4.79812	1	7.99345	1	4.24106	1	1	1	1	3
512546	Q8IYI6	Exocyst complex component 8 (Exocyst complex 84 kDa subunit) - Homo sapiens (Human)	EXOC8_HUMAN	N	0.078125	1	1	1	6.22966	4.24106	3.02769	1	1	1	3
509010	P08133	Annexin A6 (Annexin VI) (Lipocortin VI) (P68) (P70) (Protein III) (Chromobindin-20) (67 kDa calelectrin) (Calphobindin-II) (CPB-II) - Homo sapiens (Human)	ANXA6_HUMAN	N	0.0791352	1.40247	5.05476	1.81792	0.793386	1.99515	1.3608	3.09009	2.23705	1.69623	3
522566	Q9H269	Vacuolar protein sorting-associated protein 16 (hVPS16) - Homo sapiens (Human)	VPS16_HUMAN	N	0.0792294	0.217355	4.89129	1.30261	1.83369	21.5625	0.805948	1.31585	11.2731	1.26596	3
519774	P19474	52 kDa Ro protein (Sjoegren syndrome type A antigen) (SS-A) (Ro(SS-A)) (52 kDa ribonucleoprotein autoantigen Ro/SS-A) (Tripartite motif-containing protein 21) (RING finger protein 81) - Homo sapiens (Human)	RO52_HUMAN	N	0.0794692	1	1	11.9313	8.80852	4.3125	1	1.29359	1	1	3
509997	P28907	ADP-ribosyl cyclase 1 (EC 3.2.2.5) (Cyclic ADP-ribose hydrolase 1) (cADPr hydrolase 1) (Lymphocyte differentiation antigen CD38) (T10) (Acute lymphoblastic leukemia cells antigen CD38) - Homo sapiens (Human)	CD38_HUMAN	Y	0.0802299	1	5.40817	1.42638	0.962312	17.25	1	10.5935	1	1	3
515015	Q96MP8	BTB/POZ domain-containing protein KCTD7 - Homo sapiens (Human)	KCTD7_HUMAN	N	0.0831336	6.80538	1	1	1	8.69645	1	1	1	3.51679	3
517610	Q9H0X9	Oxysterol-binding protein-related protein 5 (OSBP-related protein 5) (ORP-5) - Homo sapiens (Human)	OSBL5_HUMAN	N	0.0833817	4.79812	1	1.93164	6.22966	1	0.886795	1	1	3.79672	3
521057	Q9Y6A5	Transforming acidic coiled-coil-containing protein 3 (ERIC-1) - Homo sapiens (Human)	TACC3_HUMAN	N	0.088132	1	1.34352	1	3.11483	1	6.05538	1	1	7.03359	3
511799	O75935	Dynactin subunit 3 (Dynactin complex subunit 22 kDa subunit) (p22) - Homo sapiens (Human)	DCTN3_HUMAN	N	0.0883514	1.04551	0.609188	3.48722	4.9276	1.27058	4.68871	1.99002	1.10919	0.881132	3
516383	Q99735	Microsomal glutathione S-transferase 2 (EC 2.5.1.18) (Microsomal GST-2) (Microsomal GST-II) - Homo sapiens (Human)	MGST2_HUMAN	Y	0.0890231	0.739592	1.04146	2.13475	1.30791	2.09903	0.768587	1.36977	1.70113	3.65676	3
509173	P25098	Beta-adrenergic receptor kinase 1 (EC 2.7.11.15) (Beta-ARK-1) (G-protein coupled receptor kinase 2) - Homo sapiens (Human)	ARBK1_HUMAN	N	0.0901007	3.40269	1	7.99345	4.9276	1	1	1.29359	1	1	3
522461	P50552	Vasodilator-stimulated phosphoprotein (VASP) - Homo sapiens (Human)	VASP_HUMAN	N	0.0903087	1.60746	1.24121	4.23608	1.49602	13.405	0.866048	2.32205	0.540243	0.722082	3
519156	P61225	Ras-related protein Rap-2b precursor - Homo sapiens (Human)	RAP2B_HUMAN	N	0.0903264	1	3.4415	1.49832	1.73445	7.41156	0.700808	7.62781	1	1.76226	3
522504	O43516	Wiskott-Aldrich syndrome protein-interacting protein (WASP-interacting protein) (PRPL-2 protein) - Homo sapiens (Human)	WASIP_HUMAN	N	0.0927488	1	4.89129	4.64323	1.33533	4.38395	1	1	1	1	3
514331	P32942	Intercellular adhesion molecule 3 precursor (ICAM-3) (ICAM-R) (CDw50) (CD50 antigen) - Homo sapiens (Human)	ICAM3_HUMAN	Y	0.0930639	1	5.40817	9.28647	1	1	3.32204	1	1	1	3
513759	P62805	Histone H4 - Homo sapiens (Human)	H4_HUMAN	N	0.0933703	0.870054	1.23297	1.76327	0.778021	0.800082	1.37601	3.00264	3.87657	2.56355	3
514254	P01774	Ig heavy chain V-III region POM - Homo sapiens (Human)	HV3M_HUMAN	N	0.0951718	1	9.78258	5.28975	1	1	1	1	1	3.51679	3
514256	P01776	Ig heavy chain V-III region WAS - Homo sapiens (Human)	HV3O_HUMAN	N	0.0951718	1	9.78258	5.28975	1	1	1	1	1	3.51679	3
514259	P01779	Ig heavy chain V-III region TUR - Homo sapiens (Human)	HV3R_HUMAN	N	0.0951718	1	9.78258	5.28975	1	1	1	1	1	3.51679	3
515792	O75022	Leukocyte immunoglobulin-like receptor subfamily B member 3 precursor (Leukocyte immunoglobulin-like receptor 3) (LIR-3) (Immunoglobulin-like transcript 5) (ILT-5) (Monocyte inhibitory receptor HL9) (CD85a antigen) - Homo sapiens (Huma	LIRB3_HUMAN	Y	0.0973026	1	1	1.13605	6.74038	8.48212	1	4.10105	1	1	3
513266	Q96F15	GTPase, IMAP family member 5 (Immunity-associated nucleotide 4-like 1 protein) (Immunity-associated protein 3) (IAN-5) - Homo sapiens (Human)	GIMA5_HUMAN	Y	0.0973175	1	17.2583	1	0.93408	10.7455	1	3.58298	1	1	3
514768	P26010	Integrin beta-7 precursor - Homo sapiens (Human)	ITB7_HUMAN	Y	0.0975861	1	1	9.28647	0.93408	6.43303	1	4.10105	1	1	3
521510	O43617	Trafficking protein particle complex subunit 3 (BET3 homolog) - Homo sapiens (Human)	TPPC3_HUMAN	N	0.102066	0.891368	1.20311	1.97501	0.881598	10.8884	0.768587	0.925185	2.06898	7.31352	3
519863	Q9Y3Z3	SAM domain and HD domain-containing protein 1 (Dendritic cell-derived IFNG-induced protein) (DCIP) (Monocyte protein 5) (MOP-5) - Homo sapiens (Human)	SAMH1_HUMAN	N	0.108034	1.1553	2.904	0.871778	1.05076	2.76859	2.45887	1.81185	1.44199	0.90796	3
521400	Q9BYX2	TBC1 domain family member 2 (Prostate antigen recognized and identified by SEREX) (PARIS-1) - Homo sapiens (Human)	TBCD2_HUMAN	N	0.109058	1	4.89129	1	3.11483	1	0.973008	4.4419	1	1	3
516736	P07197	Neurofilament triplet M protein (160 kDa neurofilament protein) (Neurofilament medium polypeptide) (NF-M) (Neurofilament 3) - Homo sapiens (Human)	NFM_HUMAN	N	0.110025	0.851703	1.72442	0.713483	0.869482	1.11839	1.58699	2.26635	3.90219	3.51986	3
508486	P02763	Alpha-1-acid glycoprotein 1 precursor (AGP 1) (Orosomucoid-1) (OMD 1) - Homo sapiens (Human)	A1AG1_HUMAN	N	0.110948	1.49384	3.9422	1.02193	1.14415	3.56227	1.43756	2.0872	0.0173424	1.30428	3
522295	P19971	Thymidine phosphorylase precursor (EC 2.4.2.4) (TdRPase) (TP) (Platelet-derived endothelial cell growth factor) (PD-ECGF) (Gliostatin) - Homo sapiens (Human)	TYPH_HUMAN	N	0.11275	1.39506	4.95475	1.60282	1.16284	6.61048	1.89326	2.35305	1.83193	1.34055	3
522134	Q96LR5	Ubiquitin-conjugating enzyme E2 E2 (EC 6.3.2.19) (Ubiquitin-protein ligase E2) (Ubiquitin carrier protein E2) (UbcH8) - Homo sapiens (Human)	UB2E2_HUMAN	N	0.11315	1	1	1	1	4.24106	3.02769	1	1.62644	3.51679	3
517711	Q8NGV7	Olfactory receptor 5H2 - Homo sapiens (Human)	OR5H2_HUMAN	Y	0.11377	1	5.92505	1	0.868289	4.24106	1	4.10105	1	1	3
509273	Q9H7F0	Probable cation-transporting ATPase 13A3 (EC 3.6.3.-) (ATPase family homolog up-regulated in senescence cells 1) - Homo sapiens (Human)	AT133_HUMAN	Y	0.114463	3.40269	1	1	0.962312	4.24106	6.64408	1	1	1	3
513257	Q9HAV0	Guanine nucleotide-binding protein subunit beta 4 (Transducin beta chain 4) - Homo sapiens (Human)	GBB4_HUMAN	N	0.115899	1.29282	9.94362	1.12622	1.0489	2.14796	0.911968	2.42349	1.11618	0.550763	3
513652	P63096	Guanine nucleotide-binding protein G(i), alpha-1 subunit (Adenylate cyclase-inhibiting G alpha protein) - Homo sapiens (Human)	GNAI1_HUMAN	N	0.117408	1.2399	9.455	1.33991	0.936778	3.30271	1.00684	2.09471	0.759312	0.772558	3
513582	P46976	Glycogenin-1 (EC 2.4.1.186) - Homo sapiens (Human)	GLYG_HUMAN	N	0.118883	3.04353	1	7.47118	1.98466	25.875	0.538289	0.52148	0.610659	1.02681	3
518762	O43586	Proline-serine-threonine phosphatase-interacting protein 1 (PEST phosphatase-interacting protein 1) (CD2-binding protein 1) (H-PIP) - Homo sapiens (Human)	PPIP1_HUMAN	N	0.119775	1	4.89129	1	0.779626	4.38395	1	4.78274	1	1	3
520439	P50453	Serpin B9 (Cytoplasmic antiproteinase 3) (CAP-3) (CAP3) (Protease inhibitor 9) - Homo sapiens (Human)	SPB9_HUMAN	N	0.120816	1.97573	2.27913	1.68094	1.27521	5.98143	1.1777	5.2421	0.649775	0.846782	3
519352	Q9H4E5	Rho-related GTP-binding protein RhoJ (Tc10-like GTP-binding protein TCL) - Homo sapiens (Human)	RHOJ_HUMAN	N	0.121374	0.784251	1.60358	2.21419	2.82141	1.52259	1.19024	0.404682	1.71166	2.53192	3
519353	P17081	Rho-related GTP-binding protein RhoQ (Ras-related GTP-binding protein TC10) - Homo sapiens (Human)	RHOQ_HUMAN	N	0.121374	0.784251	1.60358	2.21419	2.82141	1.52259	1.19024	0.404682	1.71166	2.53192	3
517246	P78316	Probable nucleolar complex protein 14 - Homo sapiens (Human)	NOP14_HUMAN	N	0.122905	1	1	1	3.62555	1	0.886795	1	3.66939	3.79672	3
514334	Q5TEJ8	Induced by contact to basement membrane 1 protein (Protein ICB-1) - Homo sapiens (Human)	ICB1_HUMAN	N	0.126171	4.0424	1.51036	1.72255	1.25435	30.3304	0.257221	1.49132	1.03449	5.41515	3
511539	Q9P0U4	CpG-binding protein (PHD finger and CXXC domain-containing protein 1) (CXXC-type zinc finger protein 1) - Homo sapiens (Human)	CXCC1_HUMAN	N	0.126713	1.0893	1	5.28975	10.8767	0.842405	4.68871	1.39285	0.530186	1.18654	3
517043	Q9UBU9	Nuclear RNA export factor 1 (Tip-associating protein) (Tip-associated protein) (mRNA export factor TAP) - Homo sapiens (Human)	NXF1_HUMAN	N	0.135046	3.40269	0.0653145	3.99672	1	4.38395	0.0976317	1.39285	0.0613938	0.427439	3
510175	Q9UBR2	Cathepsin Z precursor (EC 3.4.22.-) (Cathepsin X) (Cathepsin P) - Homo sapiens (Human)	CATZ_HUMAN	Y	0.136487	1.38958	6.09716	0.933274	0.868289	6.30094	1.86521	2.08024	1.08425	1.57723	3
515371	Q13094	Lymphocyte cytosolic protein 2 (SH2 domain-containing leukocyte protein of 76 kDa) (SLP-76 tyrosine phosphoprotein) (SLP76) - Homo sapiens (Human)	LCP2_HUMAN	N	0.138613	1	1	7.99345	2.46671	6.50448	1	1	1	1	3
521867	Q8NG11	Tetraspanin-14 (Tspan-14) (Transmembrane 4 superfamily member 14) (DC-TM4F2) - Homo sapiens (Human)	TSN14_HUMAN	Y	0.14084	1	4.89129	1	1	8.48212	2.80214	1.19433	1	1	3
513609	O60234	Glia maturation factor gamma (GMF-gamma) - Homo sapiens (Human)	GMFG_HUMAN	N	0.141333	0.627654	1.38868	4.60452	1.1431	5.88288	20.8574	1.77841	0.545987	1.20449	3
514563	O14920	Inhibitor of nuclear factor kappa B kinase subunit beta (EC 2.7.11.10) (I-kappa-B-kinase beta) (IkBKB) (IKK-beta) (IKK-B) (I-kappa-B kinase 2) (IKK2) (Nuclear factor NF-kappa-B inhibitor kinase beta) (NFKBIKB) - Homo sapiens (Human)	IKKB_HUMAN	N	0.141835	3.40269	4.89129	1	0.907458	1	1	1	1	3.51679	3
509277	O95352	Autophagy-related protein 7 (APG7-like) (Ubiquitin-activating enzyme E1-like protein) (hAGP7) - Homo sapiens (Human)	ATG7_HUMAN	N	0.14207	1	1	1	10.8767	4.24106	11.3328	0.291225	1	1	3
508886	P02760	AMBP protein precursor [Contains: Alpha-1-microglobulin (Protein HC) (Complex-forming glycoprotein heterogeneous in charge) (Alpha-1 microglycoprotein); Inter-alpha-trypsin inhibitor light chain (ITI-LC) (Bikunin) (HI-30)] - Homo sapien	AMBP_HUMAN	N	0.143632	1	14.2957	1	1	1	3.02769	1.31916	1	3.79672	3
510130	P07858	Cathepsin B precursor (EC 3.4.22.1) (Cathepsin B1) (APP secretase) (APPS) [Contains: Cathepsin B light chain; Cathepsin B heavy chain] - Homo sapiens (Human)	CATB_HUMAN	N	0.145078	1.19896	4.55368	0.826676	1.51566	4.43913	0.751734	3.59567	0.613366	0.935953	3
510132	P07339	Cathepsin D precursor (EC 3.4.23.5) [Contains: Cathepsin D light chain; Cathepsin D heavy chain] - Homo sapiens (Human)	CATD_HUMAN	N	0.145443	1.4187	2.90152	0.637414	0.846359	3.17266	0.756999	2.59551	1.67662	0.813588	3
514568	P80217	Interferon-induced 35 kDa protein (IFP 35) - Homo sapiens (Human)	IN35_HUMAN	N	0.147991	1.37496	1.48549	2.32935	1.6745	7.20637	9.67177	1.07557	1	0.649339	3
512988	O95466	Formin-like protein 1 (Leukocyte formin) (CLL-associated antigen KW-13) - Homo sapiens (Human)	FMNL_HUMAN	N	0.14852	1	1	12.4745	1.12791	43.1965	1	1.99002	1	3.79672	3
508541	O95477	ATP-binding cassette sub-family A member 1 (ATP-binding cassette transporter 1) (ATP-binding cassette 1) (ABC-1) (Cholesterol efflux regulatory protein) - Homo sapiens (Human)	ABCA1_HUMAN	Y	0.157897	1	5.92505	1	1	6.43303	0.292895	15.7171	1	1	3
518325	P41219	Peripherin - Homo sapiens (Human)	PERI_HUMAN	N	0.159029	1.10588	1.43955	0.879025	1.04829	2.26864	2.13345	3.04075	1.31696	0.776578	3
521924	O00635	Tripartite motif-containing protein 38 (RING finger protein 15) (Zinc finger protein RoRet) - Homo sapiens (Human)	TRI38_HUMAN	N	0.164297	1.47918	1	3.99672	1	1	3.17486	1	1	3.51679	3
510569	P08603	Complement factor H precursor (H factor 1) - Homo sapiens (Human)	CFAH_HUMAN	N	0.16485	0.585872	14.2095	1.29639	1.32182	0.430984	6.64508	1.99561	0.17708	5.4972	3
522538	P15498	Proto-oncogene vav - Homo sapiens (Human)	VAV_HUMAN	N	0.165312	1	1	25.861	1.12486	6.50448	0.973008	4.10105	1	1	3
511272	P16220	cAMP response element-binding protein (CREB) - Homo sapiens (Human)	CREB1_HUMAN	N	0.166199	1	4.89129	1	3.62555	1	1	1	3.66939	0.831919	3
517649	Q9BZF1	Oxysterol-binding protein-related protein 8 (OSBP-related protein 8) (ORP-8) - Homo sapiens (Human)	OSBL8_HUMAN	Y	0.166876	4.79812	1.05039	1.67523	1.62085	1	1.35175	4.78274	1	7.31352	3
518965	P15153	Ras-related C3 botulinum toxin substrate 2 precursor (p21-Rac2) (Small G protein) (GX) - Homo sapiens (Human)	RAC2_HUMAN	N	0.168784	1.28669	5.93332	2.48319	1.37915	4.55524	0.9101	0.709307	1.29335	1.17811	3
516906	P14598	Neutrophil cytosol factor 1 (NCF-1) (Neutrophil NADPH oxidase factor 1) (47 kDa neutrophil oxidase factor) (p47-phox) (NCF-47K) (47 kDa autosomal chronic granulomatous disease protein) (NOXO2) - Homo sapiens (Human)	NCF1_HUMAN	N	0.168998	1	1	26.5664	3.11483	8.55357	1	1	1	1	3
515503	Q16719	Kynureninase (EC 3.7.1.3) (L-kynurenine hydrolase) - Homo sapiens (Human)	KYNU_HUMAN	N	0.169292	1	1	3.99672	3.47316	25.4464	1	1	1	1	3
514915	Q14165	Protein KIAA0152 precursor - Homo sapiens (Human)	K0152_HUMAN	Y	0.171306	1.01821	1.96249	1.47763	0.470433	0.821452	2.11094	5.68235	3.17817	1.02589	3
512301	O14681	Etoposide-induced protein 2.4 (p53-induced protein 8) - Homo sapiens (Human)	EI24_HUMAN	Y	0.173461	0.80848	1	1	3.62555	4.38395	6.64408	1	1.44031	1	3
512534	Q9UHX3	EGF-like module-containing mucin-like hormone receptor-like 2 precursor (EGF-like module EMR2) (CD312 antigen) - Homo sapiens (Human)	EMR2_HUMAN	Y	0.173756	1	0.393896	1.84487	0.881598	8.62501	1	1	9.96834	14.0672	3
517882	O95453	Poly(A)-specific ribonuclease PARN (EC 3.1.13.4) (Polyadenylate-specific ribonuclease) (Deadenylating nuclease) (Deadenylation nuclease) - Homo sapiens (Human)	PARN_HUMAN	N	0.175148	0.192601	0.834983	2.32481	3.11483	4.3125	0.583805	0.30297	0.08321	0.356258	3
509441	P59998	Actin-related protein 2/3 complex subunit 4 (ARP2/3 complex 20 kDa subunit) (p20-ARC) - Homo sapiens (Human)	ARPC4_HUMAN	N	0.175468	1.65822	4.08559	1.21148	1.26684	3.7014	1.13839	3.111	0.42566	0.392538	3
518846	P28065	Proteasome subunit beta type 9 precursor (EC 3.4.25.1) (Proteasome chain 7) (Macropain chain 7) (Multicatalytic endopeptidase complex chain 7) (RING12 protein) (Low molecular mass protein 2) - Homo sapiens (Human)	PSB9_HUMAN	N	0.176858	2.13413	10.8163	2.91069	1.67632	1.89597	1.45527	0.780508	1	0.822158	3
509498	Q07812	Apoptosis regulator BAX, membrane isoform alpha - Homo sapiens (Human)	BAXA_HUMAN	Y	0.178663	0.974256	1.27247	3.77575	2.10814	21.634	0.236466	0.94342	1.25617	1.27905	3
509499	Q07814	Apoptosis regulator BAX, cytoplasmic isoform beta - Homo sapiens (Human)	BAXB_HUMAN	N	0.178663	0.974256	1.27247	3.77575	2.10814	21.634	0.236466	0.94342	1.25617	1.27905	3
513608	P60983	Glia maturation factor beta (GMF-beta) - Homo sapiens (Human)	GMFB_HUMAN	N	0.179331	0.6041	0.945446	3.82982	1.29376	5.94251	4.87305	1.64158	0.575986	0.80795	3
518941	Q92692	Poliovirus receptor-related protein 2 precursor (Herpes virus entry mediator B) (HveB) (Nectin-2) (CD112 antigen) - Homo sapiens (Human)	PVRL2_HUMAN	Y	0.179868	0.80848	1.57558	1.16241	7.25111	1	1	4.17856	3.66939	0.560612	3
509162	P10398	A-Raf proto-oncogene serine/threonine-protein kinase (EC 2.7.11.1) (A-raf-1) (Proto-oncogene Pks) - Homo sapiens (Human)	ARAF_HUMAN	N	0.180813	4.79812	1	1	3.62555	8.48212	0.292895	1.29359	1	1	3
514961	Q13303	Voltage-gated potassium channel subunit beta-2 (K(+) channel subunit beta-2) (Kv-beta-2) (HKvbeta2) - Homo sapiens (Human)	KCAB2_HUMAN	N	0.18186	0.217355	14.6739	1.88788	1.45403	38.884	0.678187	2.63832	1	0.25055	3
513657	P29777	Guanine nucleotide-binding protein G(o) subunit alpha 2 - Homo sapiens (Human)	GNAO2_HUMAN	N	0.182745	0.994221	13.5538	1.19683	1.00146	2.98621	0.963502	2.03234	0.662666	0.772663	3
519321	P35251	Replication factor C subunit 1 (Replication factor C large subunit) (RF-C 140 kDa subunit) (Activator 1 140 kDa subunit) (Activator 1 large subunit) (A1 140 kDa subunit) (DNA-binding protein PO-GA) - Homo sapiens (Human)	RFC1_HUMAN	N	0.185297	1	4.89129	1	5.18297	1	1	1	1	2.2379	3
517274	Q92882	Osteoclast-stimulating factor 1 - Homo sapiens (Human)	OSTF1_HUMAN	N	0.18933	0.891324	0.813731	4.67148	1.45601	5.48261	1.01873	1.06983	0.798196	3.51679	3
509186	P53677	AP-3 complex subunit mu-2 (Adapter-related protein complex 3 mu-2 subunit) (Clathrin coat assembly protein AP47 homolog 2) (Clathrin coat-associated protein AP47 homolog 2) (Golgi adaptor AP-1 47 kDa protein homolog 2) (HA1 47 kDa subu	AP3M2_HUMAN	N	0.192614	1	1	5.28975	1	4.38395	1	4.10105	1.15197	1	3
520468	O95721	Synaptosomal-associated protein 29 (SNAP-29) (Vesicle-membrane fusion protein SNAP-29) (Soluble 29 kDa NSF attachment protein) - Homo sapiens (Human)	SNP29_HUMAN	N	0.193915	0.737777	1.57558	2.96252	1.73358	10.7455	1.51948	2.5371	1	0.25055	3
522103	O75841	Uroplakin-1b (Uroplakin Ib) (UPIb) (Tetraspanin-20) (Tspan-20) - Homo sapiens (Human)	UPK1B_HUMAN	Y	0.197524	5.80175	1	1.16241	1	8.76789	1	1.23009	3.25287	1	3
508595	Q12979	Active breakpoint cluster region-related protein - Homo sapiens (Human)	ABR_HUMAN	N	0.198001	1	1	7.99345	0.584576	4.3125	1	4.10105	1	1	3
510253	P08571	Monocyte differentiation antigen CD14 precursor (Myeloid cell-specific leucine-rich glycoprotein) [Contains: Monocyte differentiation antigen CD14, urinary form; Monocyte differentiation antigen CD14, membrane-bound form] - Homo sapiens	CD14_HUMAN	N	0.198266	0.678244	19.394	0.759615	0.763943	7.35392	6.32124	1.78129	0.053433	1.97888	3
512285	Q9H223	EH-domain-containing protein 4 (Hepatocellular carcinoma-associated protein 10/11) - Homo sapiens (Human)	EHD4_HUMAN	N	0.198681	0.444254	5.05974	1.26728	1.82286	3.5795	1.25603	3.03445	1.18389	0.726153	3
518487	Q9NRZ7	1-acyl-sn-glycerol-3-phosphate acyltransferase gamma (EC 2.3.1.51) (1-AGP acyltransferase 3) (1-AGPAT 3) (Lysophosphatidic acid acyltransferase gamma) (LPAAT-gamma) (1-acylglycerol-3-phosphate O-acyltransferase 3) - Homo sapiens (Human)	PLCC_HUMAN	Y	0.19898	0.930903	5.40817	1.30699	0.794726	6.43303	1.17315	4.4419	1.82693	1	3
514044	P48506	Glutamate--cysteine ligase catalytic subunit (EC 6.3.2.2) (Gamma-glutamylcysteine synthetase) (Gamma-ECS) (GCS heavy chain) - Homo sapiens (Human)	GSH1_HUMAN	N	0.200687	1	29.3477	1	5.18297	0.19534	1	1	1	10.5504	3
518720	Q92954	Proteoglycan-4 precursor (Lubricin) (Megakaryocyte-stimulating factor) (Superficial zone proteoglycan) [Contains: Proteoglycan-4 C-terminal part] - Homo sapiens (Human)	PRG4_HUMAN	N	0.202742	1	3.48416	0.29084	1	4.24106	12.9938	1	1	1	3
513477	Q96HH9	GRAM domain-containing protein 3 (HCV NS3-transactivated protein 2) - Homo sapiens (Human)	GRAM3_HUMAN	Y	0.20316	3.40269	0.32212	1	1	1	6.64408	1	3.66939	1	3
518800	P16471	Prolactin receptor precursor (PRL-R) - Homo sapiens (Human)	PRLR_HUMAN	Y	0.204845	1	4.89129	1.16241	0.257638	4.38395	1	6.49242	1	1	3
518717	Q8TCU6	Phosphatidylinositol 3,4,5-trisphosphate-dependent Rac exchanger 1 protein (P-Rex1 protein) - Homo sapiens (Human)	PREX1_HUMAN	N	0.205333	1	1	1	2.0769	4.24106	1	4.78274	1	1	3
515791	Q8N423	Leukocyte immunoglobulin-like receptor subfamily B member 2 precursor (Leukocyte immunoglobulin-like receptor 2) (LIR-2) (Immunoglobulin-like transcript 4) (ILT-4) (Monocyte/macrophage immunoglobulin-like receptor 10) (MIR-10) (CD85d a	LIRB2_HUMAN	Y	0.20557	1	14.6739	7.99345	1.37355	8.62501	1	1	1	1	3
518817	P50897	Palmitoyl-protein thioesterase 1 precursor (EC 3.1.2.22) (PPT-1) (Palmitoyl-protein hydrolase 1) - Homo sapiens (Human)	PPT1_HUMAN	N	0.20669	0.443755	2.62075	0.988876	1.61825	2.50309	9.23856	0.828648	1.64896	1.49954	3
511397	Q8IX94	Cutaneous T-cell lymphoma-associated antigen 4 (cTAGE-4 protein) - Homo sapiens (Human)	CTGE4_HUMAN	N	0.20763	1	0.32212	3.99672	1.92462	4.24106	1	1	3.66939	1	3
519450	Q04864	C-Rel proto-oncogene protein (C-Rel protein) - Homo sapiens (Human)	REL_HUMAN	N	0.208656	1	4.89129	5.28975	1.37569	8.62501	0.292895	1.19433	1	1	3
510126	P34810	Macrosialin precursor (GP110) (CD68 antigen) - Homo sapiens (Human)	CD68_HUMAN	Y	0.21003	0.739592	3.23196	0.908585	0.562791	5.07212	0.998095	5.3786	1	1.2197	3
518383	Q9NPH0	Lysophosphatidic acid phosphatase type 6 precursor (EC 3.1.3.2) (Acid phosphatase 6, lysophosphatidic) (Acid phosphatase-like protein 1) (PACPL1) - Homo sapiens (Human)	PPA6_HUMAN	N	0.210206	3.40269	1	1	1	0.828449	1	1	4.1993	3.79672	3
522133	P51965	Ubiquitin-conjugating enzyme E2 E1 (EC 6.3.2.19) (Ubiquitin-protein ligase E1) (Ubiquitin carrier protein E1) (UbcH6) - Homo sapiens (Human)	UB2E1_HUMAN	N	0.210813	1	1	1	1	4.24106	1	1	2.21838	3.51679	3
514731	P20702	Integrin alpha-X precursor (Leukocyte adhesion glycoprotein p150,95 alpha chain) (Leukocyte adhesion receptor p150,95) (Leu M5) (CD11c antigen) - Homo sapiens (Human)	ITAX_HUMAN	Y	0.211637	1	12.7451	3.03194	0.815893	9.63881	1	1.94039	1	1.21721	3
518071	P51003	Poly(A) polymerase alpha (EC 2.7.7.19) (PAP) (Polynucleotide adenylyltransferase alpha) - Homo sapiens (Human)	PAPOA_HUMAN	N	0.211684	1	4.89129	1	1	1	2.43959	4.78274	1	1	3
513907	P02790	Hemopexin precursor (Beta-1B-glycoprotein) - Homo sapiens (Human)	HEMO_HUMAN	N	0.211799	3.78312	4.02483	0.725654	0.83906	6.77818	1.36018	1.73204	0.0948588	1.83302	3
520805	P50226	Sulfotransferase 1A2 (EC 2.8.2.1) (Aryl sulfotransferase 2) (Phenol sulfotransferase 2) (Phenol-sulfating phenol sulfotransferase 2) (P-PST 2) (ST1A2) - Homo sapiens (Human)	ST1A2_HUMAN	N	0.211969	1	14.6739	0.214765	1.08056	17.3215	1	4.10105	1	1	3
522196	Q9GZZ9	Ubiquitin-activating enzyme E1 domain-containing protein 1 (UFM1-activating enzyme) (Ubiquitin-activating enzyme 5) (ThiFP1) - Homo sapiens (Human)	UE1D1_HUMAN	Y	0.213266	0.217355	1.57558	3.99672	8.55316	1	3.17486	1	1	1.35677	3
513263	Q02153	Guanylate cyclase soluble subunit beta-1 (EC 4.6.1.2) (GCS-beta-1) (Soluble guanylate cyclase small subunit) (GCS-beta-3) - Homo sapiens (Human)	GCYB1_HUMAN	N	0.213987	6.80538	1	1	3.11483	1	1	4.78274	0.281925	1	3
516672	P13995	Bifunctional methylenetetrahydrofolate dehydrogenase/cyclohydrolase, mitochondrial precursor [Includes: NAD-dependent methylenetetrahydrofolate dehydrogenase (EC 1.5.1.15); Methenyltetrahydrofolate cyclohydrolase (EC 3.5.4.9)] - Homo sa	MTDC_HUMAN	N	0.214844	0.80848	0.212005	0.0691086	0.645788	4.24106	2.7466	0.128874	3.66939	1.70125	3
510051	P09326	CD48 antigen precursor (B-lymphocyte activation marker BLAST-1) (BCM1 surface antigen) (Leukocyte antigen MEM-102) (TCT.1) - Homo sapiens (Human)	CD48_HUMAN	Y	0.214934	1	10.8163	1.06698	0.835394	8.62501	1	1	1	3.79672	3
511945	Q16854	Deoxyguanosine kinase, mitochondrial precursor (EC 2.7.1.113) (dGK) - Homo sapiens (Human)	DGUOK_HUMAN	N	0.214944	1	0.32212	4.64323	3.37019	1	1	1	1	3.79672	3
508958	Q15052	Rho guanine nucleotide exchange factor 6 (Rac/Cdc42 guanine nucleotide exchange factor 6) (PAK-interacting exchange factor alpha) (Alpha-Pix) (COOL-2) - Homo sapiens (Human)	ARHG6_HUMAN	N	0.216906	1	4.89129	6.6416	1.91395	1	1	1	1	3.51679	3
510947	P06681	Complement C2 precursor (EC 3.4.21.43) (C3/C5 convertase) [Contains: Complement C2b fragment; Complement C2a fragment] - Homo sapiens (Human)	CO2_HUMAN	N	0.219195	1	7.85382	0.214765	0.802498	12.7232	1	1	1	7.03359	3
515640	O75427	Leucine-rich repeats and calponin homology domain-containing protein 4 (Leucine-rich neuronal protein) - Homo sapiens (Human)	LRCH4_HUMAN	Y	0.219694	1	0.993203	21.9231	0.899011	8.76789	6.64408	1.31916	0.448134	1	3
515793	Q8NHJ6	Leukocyte immunoglobulin-like receptor subfamily B member 4 precursor (Leukocyte immunoglobulin-like receptor 5) (LIR-5) (Immunoglobulin-like transcript 3) (ILT-3) (Monocyte inhibitory receptor HM18) (CD85k antigen) - Homo sapiens (Hum	LIRB4_HUMAN	Y	0.219778	1	1	3.28208	0.972201	8.69645	1	6.49242	1	1	3
522065	Q9UH99	Sad1/unc-84-like protein 2 (Rab5-interacting protein) (Rab5IP) - Homo sapiens (Human)	UN84B_HUMAN	Y	0.221987	0.306084	4.30212	5.14083	0.573388	1.60429	1.92438	1.38749	1.12084	3.03332	3
510250	Q9Y3C0	Coiled-coil domain-containing protein 53 - Homo sapiens (Human)	CCD53_HUMAN	N	0.223433	0.369796	0.32212	2.70088	0.863231	8.78347	1.42231	1.30974	0.988962	2.08794	3
518382	P13686	Tartrate-resistant acid phosphatase type 5 precursor (EC 3.1.3.2) (TR-AP) (Tartrate-resistant acid ATPase) (TrATPase) (Acid phosphatase 5, tartrate resistant) - Homo sapiens (Human)	PPA5_HUMAN	N	0.227381	3.40269	6.30233	1	1	0.619195	1	9.22464	1	1	3
513373	P52566	Rho GDP-dissociation inhibitor 2 (Rho GDI 2) (Rho-GDI beta) (Ly-GDI) - Homo sapiens (Human)	GDIS_HUMAN	N	0.228339	1.10285	6.28085	2.00517	1.41256	6.83706	1.16691	1.01484	1	0.904511	3
511123	Q9Y6G5	COMM domain-containing protein 10 - Homo sapiens (Human)	COMDA_HUMAN	N	0.228649	1	0.296512	1	1	8.76789	3.17486	1	1	3.51679	3
514450	P21399	Iron-responsive element-binding protein 1 (IRE-BP 1) (Iron regulatory protein 1) (IRP1) (Ferritin repressor protein) (Aconitate hydratase) (EC 4.2.1.3) (Citrate hydro-lyase) (Aconitase) - Homo sapiens (Human)	IREB1_HUMAN	N	0.228967	0.699966	0.32212	0.6931	0.734147	3.93255	1.69211	1.27353	3.5076	2.44078	3
521679	Q9NRS4	Transmembrane protease, serine 4 (EC 3.4.21.-) (Membrane-type serine protease 2) (MT-SP2) - Homo sapiens (Human)	TMPS4_HUMAN	Y	0.229025	1.61696	1.31944	0.805216	0.417062	0.949654	1.58123	2.99342	10.2333	3.1541	3
516496	Q13614	Myotubularin-related protein 2 (EC 3.1.3.-) - Homo sapiens (Human)	MTMR2_HUMAN	N	0.229926	4.79812	0.274675	0.13359	3.37019	4.38395	0.223995	1.44903	0.217528	0.11689	3
515998	P02686	Myelin basic protein (MBP) (Myelin A1 protein) (Myelin membrane encephalitogenic protein) - Homo sapiens (Human)	MBP_HUMAN	N	0.231395	1	4.89129	1	3.11483	1	1	1	1.10919	2.30804	3
517035	Q04721	Neurogenic locus notch homolog protein 2 precursor (Notch 2) (hN2) [Contains: Notch 2 extracellular truncation; Notch 2 intracellular domain] - Homo sapiens (Human)	NOTC2_HUMAN	Y	0.231989	1	4.89129	1	1	1	3.02769	1	1	2.67847	3
513340	Q96PP8	Interferon-induced guanylate-binding protein 5 (GTP-binding protein 5) (Guanine nucleotide-binding protein 5) (GBP-5) (GBP-TA antigen) - Homo sapiens (Human)	GBP5_HUMAN	N	0.232106	3.40269	9.78258	1	1	4.3125	1	0.621248	1	1	3
512465	Q00013	55 kDa erythrocyte membrane protein (p55) (Membrane protein, palmitoylated 1) - Homo sapiens (Human)	EM55_HUMAN	N	0.234718	1	81.1225	3.99672	1.37569	1.3152	1	8.2021	1	1	3
518733	Q12913	Receptor-type tyrosine-protein phosphatase eta precursor (EC 3.1.3.48) (Protein-tyrosine phosphatase eta) (R-PTP-eta) (HPTP eta) (Protein-tyrosine phosphatase receptor type J) (Density-enhanced phosphatase 1) (DEP-1) (CD148 antigen) -	PTPRJ_HUMAN	Y	0.235249	1	9.78258	0.965821	1.02397	10.6741	9.08306	1	1	0.219115	3
513366	O95166	Gamma-aminobutyric acid receptor-associated protein (GABA(A) receptor-associated protein) (MM46) - Homo sapiens (Human)	GBRAP_HUMAN	N	0.237263	3.40269	1	2.32481	3.11483	1	1	1	1	1	3
512066	Q9Y6K1	DNA (cytosine-5)-methyltransferase 3A (EC 2.1.1.37) (Dnmt3a) (DNA methyltransferase HsaIIIA) (DNA MTase HsaIIIA) (M.HsaIIIA) - Homo sapiens (Human)	DNM3A_HUMAN	N	0.238404	1	4.89129	1	3.62555	1	1	0.291225	1	3.51679	3
509543	P53004	Biliverdin reductase A precursor (EC 1.3.1.24) (Biliverdin-IX alpha-reductase) (BVR A) - Homo sapiens (Human)	BIEA_HUMAN	N	0.239338	0.499495	6.79561	1.39018	1.10933	5.14205	0.849683	1.27349	1	2.87465	3
520804	P50225	Sulfotransferase 1A1 (EC 2.8.2.1) (Aryl sulfotransferase 1) (Phenol sulfotransferase 1) (Phenol-sulfating phenol sulfotransferase 1) (P-PST 1) (Thermostable phenol sulfotransferase) (Ts-PST) (HAST1/HAST2) (ST1A3) - Homo sapiens (Human)	ST1A1_HUMAN	N	0.249098	1	14.6739	0.214765	0.6975	19.5134	1	4.10105	1	1	3
509967	P30536	Peripheral-type benzodiazepine receptor (PBR) (PKBS) (Mitochondrial benzodiazepine receptor) - Homo sapiens (Human)	BZRP_HUMAN	Y	0.249542	1.0836	2.77924	1.12269	0.57395	2.62739	0.813508	2.30057	1.16684	0.865232	3
511806	Q9Y315	Putative deoxyribose-phosphate aldolase (EC 4.1.2.4) (Phosphodeoxyriboaldolase) (Deoxyriboaldolase) (DERA) - Homo sapiens (Human)	DEOC_HUMAN	N	0.249842	6.80538	19.5652	0.965821	1.09578	3.35566	1.29803	0.529759	1	0.770582	3
510772	Q15417	Calponin-3 (Calponin, acidic isoform) - Homo sapiens (Human)	CNN3_HUMAN	N	0.254204	2.95837	0.0535244	4.64963	2.13466	1.44127	0.967138	0.195574	0.657592	0.220651	3
517153	Q9Y5Y2	Nucleotide-binding protein 2 (NBP 2) - Homo sapiens (Human)	NUBP2_HUMAN	N	0.254761	8.89852	1	1	0.265425	1	3.02769	1	1	3.51679	3
519638	Q7L523	Ras-related GTP-binding protein A (Rag A) (RagA) (Adenovirus E3 14.7 kDa-interacting protein 1) (FIP-1) - Homo sapiens (Human)	RRAGA_HUMAN	N	0.255318	0.2376	2.90065	0.766927	1.0874	10.6741	1	1.21794	1.18389	2.80306	3
519654	Q5VZM2	Ras-related GTP-binding protein B (Rag B) (RagB) - Homo sapiens (Human)	RRAGB_HUMAN	N	0.255318	0.2376	2.90065	0.766927	1.0874	10.6741	1	1.21794	1.18389	2.80306	3
512872	Q13045	Protein flightless-1 homolog - Homo sapiens (Human)	FLII_HUMAN	N	0.255748	0.766952	2.14497	2.57081	1.51849	2.98392	1.15127	0.846022	0.692818	0.671122	3
514006	P22492	Histone H1t (Testicular H1 histone) - Homo sapiens (Human)	H1T_HUMAN	N	0.256153	0.736179	2.79436	1.12331	0.706476	0.792311	1.2699	1.04038	4.88838	2.75149	3
521707	Q9P0S9	Transmembrane protein 14C - Homo sapiens (Human)	TM14C_HUMAN	Y	0.258374	0.491851	0.16106	1	0.0625737	4.38395	0.111997	4.78274	0.554595	7.59345	3
511252	Q6QEF8	Coronin-6 - Homo sapiens (Human)	CORO6_HUMAN	N	0.259288	1.70341	0.46343	3.86328	1.62435	19.442	1.37964	1.03516	0.15697	3.51679	3
515541	Q99538	Legumain precursor (EC 3.4.22.34) (Asparaginyl endopeptidase) (Protease, cysteine 1) - Homo sapiens (Human)	LGMN_HUMAN	N	0.261476	1.54501	3.64274	0.489919	0.881598	5.05443	1.26682	6.5958	1	0.957648	3
509178	P50579	Methionine aminopeptidase 2 (EC 3.4.11.18) (MetAP 2) (Peptidase M 2) (Initiation factor 2-associated 67 kDa glycoprotein) (p67) (p67eIF2) - Homo sapiens (Human)	AMPM2_HUMAN	N	0.265274	2.70141	0.690494	0.574508	1.40414	3.61512	2.96945	1.06799	0.649775	0.786159	3
518968	Q9NS91	Postreplication repair protein RAD18 (hRAD18) (hHR18) (RING finger protein 73) - Homo sapiens (Human)	RAD18_HUMAN	N	0.26631	4.79812	4.89129	1	1	1	1	4.78274	0.217528	1	3
513775	Q8IZP7	Heparan-sulfate 6-O-sulfotransferase 3 (EC 2.8.2.-) (HS6ST-3) - Homo sapiens (Human)	H6ST3_HUMAN	Y	0.266712	4.79812	1	1	3.62555	4.24106	1	1	1	0.25055	3
515754	Q8TDL5	Long palate, lung and nasal epithelium carcinoma-associated protein 1 precursor (Von Ebner minor salivary gland protein) (VEMSGP) - Homo sapiens (Human)	LPLC1_HUMAN	Y	0.270279	3.40269	1	1	3.11483	4.24106	0.292895	1	1	1	3
522216	Q9H1E5	Thioredoxin domain-containing protein 13 precursor - Homo sapiens (Human)	TXD13_HUMAN	Y	0.273969	0.116097	5.40817	15.9869	0.613102	1.39011	1.08938	1.34576	20.9965	1.76987	3
514234	P04196	Histidine-rich glycoprotein precursor (Histidine-proline-rich glycoprotein) (HPRG) - Homo sapiens (Human)	HRG_HUMAN	N	0.274133	4.10041	4.70961	0.909719	3.37019	0.00735979	1.47178	0.338226	0.0613938	1.16585	3
508514	P08697	Alpha-2-antiplasmin precursor (Alpha-2-plasmin inhibitor) (Alpha-2-PI) (Alpha-2-AP) - Homo sapiens (Human)	A2AP_HUMAN	N	0.280909	0.2376	6.5676	1.16241	0.401249	0.476058	8.01075	18.1084	0.450555	1.86747	3
521276	Q15560	Transcription elongation factor A protein 2 (Transcription elongation factor S-II protein 2) (Testis-specific S-II) (Transcription elongation factor TFIIS.l) - Homo sapiens (Human)	TCEA2_HUMAN	N	0.281647	4.10041	0.142588	0.29084	1.30791	4.38395	2.03392	0.0593963	0.399098	0.502928	3
509690	Q9NSY1	BMP-2-inducible protein kinase (EC 2.7.11.1) (BIKe) - Homo sapiens (Human)	BMP2K_HUMAN	N	0.282084	1	1	0.214765	8.55316	1	3.32204	4.10105	1	1	3
519630	P04271	Protein S100-B (S100 calcium-binding protein B) (S-100 protein beta subunit) (S-100 protein beta chain) - Homo sapiens (Human)	S100B_HUMAN	N	0.282153	1	5.40817	9.28647	1	4.44007	1	1.19433	1	1	3
515937	P42679	Megakaryocyte-associated tyrosine-protein kinase (EC 2.7.10.2) (Tyrosine-protein kinase CTK) (Protein kinase HYL) (Hematopoietic consensus tyrosine-lacking kinase) - Homo sapiens (Human)	MATK_HUMAN	N	0.283075	1	5.92505	1	3.47316	4.3125	1	0.291225	1	1	3
508972	P01008	Antithrombin-III precursor (ATIII) - Homo sapiens (Human)	ANT3_HUMAN	N	0.283218	1.31715	15.6678	1.14584	0.854717	1.67783	3.14907	0.742484	0.243327	2.41287	3
513404	Q10472	Polypeptide N-acetylgalactosaminyltransferase 1 (EC 2.4.1.41) (Protein-UDP acetylgalactosaminyltransferase 1) (UDP-GalNAc:polypeptide N-acetylgalactosaminyltransferase 1) (Polypeptide GalNAc transferase 1) (GalNAc-T1) (pp-GaNTase 1) [C	GALT1_HUMAN	Y	0.283393	1.43108	4.89129	1.74361	0.658013	4.38395	1.76477	4.4419	0.281925	0.873111	3
518900	P61020	Ras-related protein Rab-5B - Homo sapiens (Human)	RAB5B_HUMAN	N	0.285337	5.80175	1.26494	1.01655	1.51348	3.59125	0.177788	1.92813	2.38712	1.15764	3
510560	P00751	Complement factor B precursor (EC 3.4.21.47) (C3/C5 convertase) (Properdin factor B) (Glycine-rich beta glycoprotein) (GBG) (PBF2) [Contains: Complement factor B Ba fragment; Complement factor B Bb fragment] - Homo sapiens (Human)	CFAB_HUMAN	N	0.285762	0.541724	5.89732	0.81152	1.4423	1.45323	2.01487	0.771817	0.159639	2.04252	3
521685	P01033	Metalloproteinase inhibitor 1 precursor (TIMP-1) (Erythroid potentiating activity) (EPA) (Tissue inhibitor of metalloproteinases) (Fibroblast collagenase inhibitor) (Collagenase inhibitor) - Homo sapiens (Human)	TIMP1_HUMAN	N	0.286203	2.28007	2.32875	0.764831	2.72237	1.87845	1.99619	0.291225	0.281925	0.801251	3
522012	Q8WWH5	Probable tRNA pseudouridine synthase 1 (EC 5.4.99.-) - Homo sapiens (Human)	TRUB1_HUMAN	N	0.288011	0.227027	1	1	3.11483	1	1	1	8.3986	3.65676	3
508565	Q9P2A4	ABI gene family member 3 (New molecule including SH3) (Nesh) - Homo sapiens (Human)	ABI3_HUMAN	N	0.288824	1	5.92505	1.53847	1.14701	6.50448	1	1	1	3.51679	3
522495	P36543	Vacuolar ATP synthase subunit E (EC 3.6.3.14) (V-ATPase E subunit) (Vacuolar proton pump E subunit) (V-ATPase 31 kDa subunit) (P31) - Homo sapiens (Human)	VATE_HUMAN	N	0.290501	2.06774	0.624492	1.23945	1.20901	4.13471	2.8652	1.14037	0.673044	1.11446	3
516028	O43772	Mitochondrial carnitine/acylcarnitine carrier protein (Carnitine/acylcarnitine translocase) (CAC) (Solute carrier family 25 member 20) - Homo sapiens (Human)	MCAT_HUMAN	Y	0.290503	1	14.6739	1.16241	0.421771	4.24106	0.292895	6.83327	1	1	3
512218	Q12882	Dihydropyrimidine dehydrogenase [NADP+] precursor (EC 1.3.1.2) (DPD) (DHPDHase) (Dihydrouracil dehydrogenase) (Dihydrothymine dehydrogenase) - Homo sapiens (Human)	DPYD_HUMAN	N	0.291029	1	4.89129	1.71671	0.959947	47.3661	1	4.78274	1	1	3
520197	Q8IVB4	Sodium/hydrogen exchanger 9 (Na(+)/H(+) exchanger 9) (NHE-9) (Solute carrier family 9 member 9) - Homo sapiens (Human)	SL9A9_HUMAN	Y	0.291355	1	10.8163	1	0.623701	21.5625	1	8.88379	1	1	3
514001	Q02539	Histone H1.1 - Homo sapiens (Human)	H11_HUMAN	N	0.291539	0.612779	2.27604	1.02189	0.730065	0.877269	1.33551	1.03698	2.24127	3.09257	3
518741	P35998	26S protease regulatory subunit 7 (Proteasome 26S subunit ATPase 2) (Protein MSS1) - Homo sapiens (Human)	PRS7_HUMAN	N	0.293872	2.01306	0.540831	1.04206	2.50193	2.2684	0.754566	1.13294	1.39005	1.1628	3
511928	Q8NCG7	Sn1-specific diacylglycerol lipase beta (EC 3.1.1.-) (DGL-beta) (KCCR13L) - Homo sapiens (Human)	DGLB_HUMAN	Y	0.294732	1	1.60358	7.99345	0.336299	12.9375	3.19	1.44903	1	0.916201	3
516490	Q13459	Myosin-9B (Myosin IXb) (Unconventional myosin-9b) - Homo sapiens (Human)	MYO9B_HUMAN	N	0.297531	1	0.32212	1.641	0.674623	21.4196	9.96612	8.54295	0.483088	1	3
515460	P04433	Ig kappa chain V-III region VG precursor (Fragment) - Homo sapiens (Human)	KV3I_HUMAN	N	0.298104	1	1.94858	3.99672	1	4.3125	0.973008	1.29359	0.217528	10.9703	3
517191	Q96DE0	Nucleoside diphosphate-linked moiety X motif 16 (EC 3.6.1.-) (Nudix motif 16) - Homo sapiens (Human)	NUD16_HUMAN	N	0.298187	1	1	0.29084	3.37019	1	6.05538	1	3.66939	0.881132	3
519272	P98171	Rho-GTPase-activating protein 4 (Rho-GAP hematopoietic protein C1) (p115) - Homo sapiens (Human)	RHG04_HUMAN	N	0.299383	0.262668	0.585615	8.2806	1.08519	32.4509	0.690304	2.50804	1	1.1364	3
519580	P25815	Protein S100-P (S100 calcium-binding protein P) - Homo sapiens (Human)	S100P_HUMAN	N	0.299917	1	1	11.2848	0.894533	4.24106	3.32204	1.29359	1	1	3
520453	Q9Y6A9	Signal peptidase complex subunit 1 (EC 3.4.-.-) (Microsomal signal peptidase 12 kDa subunit) (SPase 12 kDa subunit) - Homo sapiens (Human)	SPCS1_HUMAN	Y	0.301139	1.0429	0.496601	2.62851	1.41142	4.3125	0.678187	0.806642	1.18389	2.27297	3
516772	Q8TD19	Serine/threonine-protein kinase Nek9 (EC 2.7.11.1) (NimA-related protein kinase 9) (Never in mitosis A-related kinase 9) (Nercc1 kinase) (NIMA-related kinase 8) (Nek8) - Homo sapiens (Human)	NEK9_HUMAN	N	0.304676	0.80848	1.05039	4.64323	1.751	12.7232	9.08306	0.676451	0.281925	0.25055	3
516101	P29966	Myristoylated alanine-rich C-kinase substrate (MARCKS) (Protein kinase C substrate, 80 kDa protein, light chain) (PKCSL) (80K-L protein) - Homo sapiens (Human)	MARCS_HUMAN	N	0.309673	0.772136	2.82487	1.14206	2.0064	1.06703	1.49073	5.51543	1	0.552212	3
519075	P20742	Pregnancy zone protein precursor - Homo sapiens (Human)	PZP_HUMAN	N	0.313185	0.144917	23.9919	0.746852	0.803593	1.73863	0.635688	4.8901	0.709677	2.75677	3
514244	P01764	Ig heavy chain V-III region VH26 precursor - Homo sapiens (Human)	HV3C_HUMAN	Y	0.315211	0.891244	3.61487	1.71671	3.62555	0.835427	0.74412	1.70262	0.217528	2.01846	3
511899	Q13206	Probable ATP-dependent RNA helicase DDX10 (EC 3.6.1.-) (DEAD box protein 10) - Homo sapiens (Human)	DDX10_HUMAN	N	0.315599	0.217355	1	1	1	1	6.05538	1	3.66939	3.51679	3
519254	Q9HB40	Retinoid-inducible serine carboxypeptidase precursor (EC 3.4.16.-) (Serine carboxypeptidase 1) - Homo sapiens (Human)	RISC_HUMAN	N	0.315625	1	8.37069	0.173417	0.265425	32.5224	8.01075	0.995009	0.17708	1.02608	3
511005	P01024	Complement C3 precursor [Contains: Complement C3 beta chain; Complement C3 alpha chain; C3a anaphylatoxin; Complement C3b alpha' chain; Complement C3c fragment; Complement C3dg fragment; Complement C3g fragment; Complement C3d fragment;	CO3_HUMAN	N	0.319344	2.13046	13.7167	1.23691	0.843205	0.789383	2.08157	1.68862	0.735624	1.74652	3
509148	Q01433	AMP deaminase 2 (EC 3.5.4.6) (AMP deaminase isoform L) - Homo sapiens (Human)	AMPD2_HUMAN	N	0.320591	0.891244	1	1	1.37569	4.3125	1	0.291225	3.66939	3.79672	3
521337	O43493	Trans-Golgi network integral membrane protein 2 precursor (Trans-Golgi network protein TGN51) (TGN46) (TGN48) (TGN38 homolog) - Homo sapiens (Human)	TGON2_HUMAN	Y	0.323113	8.20081	2.19632	1.56113	1.51375	0.448906	3.89203	1.05117	1.31833	0.475635	3
515054	P01042	Kininogen-1 precursor (Alpha-2-thiol proteinase inhibitor) [Contains: Kininogen-1 heavy chain; Bradykinin (Kallidin I); Lysyl-bradykinin (Kallidin II); Kininogen-1 light chain; Low molecular weight growth-promoting factor] - Homo sapien	KNG1_HUMAN	N	0.323143	1	14.7129	1.16241	1	0.167104	0.634303	2.63832	1	7.17355	3
509569	O94833	Bullous pemphigoid antigen 1, isoforms 6/9/10 (Trabeculin-beta) (Bullous pemphigoid antigen) (BPA) (Hemidesmosomal plaque protein) (Dystonia musculorum protein) (Dystonin) - Homo sapiens (Human)	BPAEA_HUMAN	N	0.324023	1	1	1	1	1	3.32204	0.291225	2.06898	7.03359	3
520577	Q9Y5X3	Sorting nexin-5 - Homo sapiens (Human)	SNX5_HUMAN	N	0.328336	0.790082	1.57558	5.28975	0.855306	10.6741	4.61152	1.2687	0.327377	0.996232	3
515437	P13473	Lysosome-associated membrane glycoprotein 2 precursor (LAMP-2) (CD107b antigen) - Homo sapiens (Human)	LAMP2_HUMAN	Y	0.32945	2.30393	0.362581	1.06383	1.97958	2.53419	0.516323	3.18435	0.743612	0.8876	3
515417	P01605	Ig kappa chain V-I region Lay - Homo sapiens (Human)	KV1M_HUMAN	N	0.330111	1	5.17592	0.173417	1	4.3125	1	1.39285	1	5.41515	3
516846	Q14112	Nidogen-2 precursor (NID-2) (Osteonidogen) - Homo sapiens (Human)	NID2_HUMAN	N	0.331479	1	5.92505	0.12354	1	0.117042	233.321	4.96998	1	0.25055	3
514047	O75367	Core histone macro-H2A.1 (Histone macroH2A1) (mH2A1) (H2A.y) (H2A/y) (Medulloblastoma antigen MU-MB-50.205) - Homo sapiens (Human)	H2AY_HUMAN	N	0.331683	0.601658	1.12423	0.693031	0.668154	0.628712	0.989379	2.17578	6.25801	4.82823	3
511961	P51659	Peroxisomal multifunctional enzyme type 2 (MFE-2) (D-bifunctional protein) (DBP) (17-beta-hydroxysteroid dehydrogenase 4) (17-beta-HSD 4) (D-3-hydroxyacyl-CoA dehydratase) (EC 4.2.1.107) (3-alpha,7-alpha,12-alpha-trihydroxy-5-beta-chole	DHB4_HUMAN	N	0.33607	0.89089	1.17689	0.931653	0.737779	2.22896	2.17934	3.36027	1.0258	0.959902	3
514474	P78318	Immunoglobulin-binding protein 1 (CD79a-binding protein 1) (B cell signal transduction molecule alpha 4) (Alpha 4 protein) (NY-REN-16 antigen) - Homo sapiens (Human)	IGBP1_HUMAN	N	0.336504	0.80848	1.45032	3.99672	0.826753	4.24106	2.41784	0.30297	1	0.881132	3
512841	Q14318	38 kDa FK506-binding protein homolog (FKBPR38) (FK506-binding protein 8) - Homo sapiens (Human)	FKBP8_HUMAN	Y	0.337424	1.27915	0.974589	1.85556	2.60845	6.43303	0.0976317	0.151485	1.59056	3.59277	3
516873	O95167	NADH dehydrogenase [ubiquinone] 1 alpha subcomplex subunit 3 (EC 1.6.5.3) (EC 1.6.99.3) (NADH-ubiquinone oxidoreductase B9 subunit) (Complex I-B9) (CI-B9) - Homo sapiens (Human)	NDUA3_HUMAN	Y	0.339847	1	1	3.99672	0.250295	1	3.02769	1	1	3.51679	3
510222	Q8N357	Uncharacterized protein C2orf18 precursor - Homo sapiens (Human)	CB018_HUMAN	Y	0.345972	0.445622	11.3332	0.382416	1.26531	4.24106	1.39267	1.58727	3.93434	1.26596	3
511408	Q7L5N1	COP9 signalosome complex subunit 6 (Signalosome subunit 6) (SGN6) (JAB1-containing signalosome subunit 6) (Vpr-interacting protein) (hVIP) (MOV34 homolog) - Homo sapiens (Human)	CSN6_HUMAN	N	0.348105	2.21878	0.580693	5.28975	0.540282	1.49751	0.292895	3.34851	1.65403	0.838518	3
522530	Q969T9	WW domain-binding protein 2 (WBP-2) - Homo sapiens (Human)	WBP2_HUMAN	N	0.352534	0.217355	1	3.99672	1.55925	4.24106	1	4.4419	1	0.831919	3
520824	Q9P246	Stromal interaction molecule 2 precursor - Homo sapiens (Human)	STIM2_HUMAN	N	0.353963	0.217355	1	3.99672	3.62555	1	1	4.10105	1	1	3
521645	Q5J8M3	Transmembrane protein 85 (Proliferation-inducing gene 17 protein) - Homo sapiens (Human)	TMM85_HUMAN	Y	0.357069	0.227027	1	1	3.11483	4.3125	1	1	1	3.79672	3
519366	Q93091	Ribonuclease K6 precursor (EC 3.1.27.-) (RNase K6) - Homo sapiens (Human)	RNAS6_HUMAN	Y	0.357533	1	11.8501	1.3862	0.437352	1.24932	6.64408	2.07028	1	1.26596	3
513946	P05538	HLA class II histocompatibility antigen, DX beta chain precursor - Homo sapiens (Human)	HB2X_HUMAN	Y	0.359084	1	5.40817	0.90037	3.37019	1	3.02769	1	1	1	3
522168	Q13404	Ubiquitin-conjugating enzyme E2 variant 1 (UEV-1) (CROC-1) (Ubiquitin-conjugating enzyme variant Kua) (TRAF6-regulated IKK activator 1 beta Uev1A) - Homo sapiens (Human)	UB2V1_HUMAN	Y	0.359373	2.36352	0.0209664	0.766927	2.06816	2.52372	0.634488	0.201003	0.967635	0.535893	3
519247	P02753	Plasma retinol-binding protein precursor (PRBP) (RBP) [Contains: Plasma retinol-binding protein(1-182); Plasma retinol-binding protein(1-181); Plasma retinol-binding protein(1-179); Plasma retinol-binding protein(1-176)] - Homo sapiens	RETBP_HUMAN	N	0.360555	0.0512101	5.19202	1.14725	0.753725	1.14205	1.38767	3.24729	0.348014	3.09816	3
521402	Q92609	TBC1 domain family member 5 - Homo sapiens (Human)	TBCD5_HUMAN	N	0.361333	1	0.296512	1	7.25111	4.38395	0.74412	1.19433	0.696694	3.51679	3
516083	Q9Y2Q5	Mitogen-activated protein-binding protein-interacting protein (Late endosomal/lysosomal Mp1-interacting protein) (p14) - Homo sapiens (Human)	MAPIP_HUMAN	N	0.362143	0.762674	1.11986	1.14475	0.954138	25.9465	2.34312	2.01625	0.831892	0.395514	3
513843	P01893	HLA class I histocompatibility antigen, alpha chain H precursor (HLA-AR) (HLA-12.4) - Homo sapiens (Human)	HLAH_HUMAN	Y	0.362287	2.23218	2.21536	1.30814	1.14945	1.7109	0.462059	1.1565	4.21548	1.00964	3
522356	Q96JC1	Vam6/Vps39-like protein (hVam6p) - Homo sapiens (Human)	VPS39_HUMAN	N	0.362996	1	0.274675	0.987507	1.85685	4.24106	1	0.30297	3.66939	3.52453	3
509738	P02746	Complement C1q subcomponent subunit B precursor - Homo sapiens (Human)	C1QB_HUMAN	Y	0.363247	1	23.7231	1.22419	0.827935	0.653118	1.23987	6.08227	1	20.1822	3
517861	Q9UNF0	Protein kinase C and casein kinase substrate in neurons protein 2 - Homo sapiens (Human)	PACN2_HUMAN	N	0.364362	1.40874	0.815553	3.75215	1.73409	2.94144	0.964647	1.03508	1.65403	2.51555	3
509337	Q16720	Plasma membrane calcium-transporting ATPase 3 (EC 3.6.3.8) (PMCA3) (Plasma membrane calcium pump isoform 3) (Plasma membrane calcium ATPase isoform 3) - Homo sapiens (Human)	AT2B3_HUMAN	Y	0.364581	3.48601	0.966883	9.28647	0.779626	0.8787	0.792298	0.482032	3.0316	0.957648	3
511398	O15320	Cutaneous T-cell lymphoma-associated antigen 5 (cTAGE-5 protein) (cTAGE family member 5) (Meningioma-expressed antigen 6/11) - Homo sapiens (Human)	CTGE5_HUMAN	Y	0.364656	1	1.57558	0.8205	1.1001	8.48212	3.02769	1	7.33878	0.881132	3
515395	P01596	Ig kappa chain V-I region CAR - Homo sapiens (Human)	KV1D_HUMAN	N	0.367155	4.79812	9.13782	1	3.11483	0.561603	0.805948	0.448587	1	1.79733	3
515397	P01598	Ig kappa chain V-I region EU - Homo sapiens (Human)	KV1F_HUMAN	N	0.367155	4.79812	9.13782	1	3.11483	0.561603	0.805948	0.448587	1	1.79733	3
511285	Q9HCS2	Cytochrome P450 4F12 (EC 1.14.14.1) (CYPIVF12) - Homo sapiens (Human)	CP4FC_HUMAN	Y	0.367168	1	1	0.29084	1	4.24106	0.292895	0.30297	7.33878	10.9703	3
521132	P42765	3-ketoacyl-CoA thiolase, mitochondrial (EC 2.3.1.16) (Beta-ketothiolase) (Acetyl-CoA acyltransferase) (Mitochondrial 3-oxoacyl-CoA thiolase) (T1) - Homo sapiens (Human)	THIM_HUMAN	N	0.367285	0.652497	2.39499	0.959074	0.655959	1.65727	0.656335	2.07992	2.06839	1.10801	3
511334	P15954	Cytochrome c oxidase subunit 7C, mitochondrial precursor (EC 1.9.3.1) (Cytochrome c oxidase polypeptide VIIc) - Homo sapiens (Human)	COX7C_HUMAN	N	0.369875	1.00032	1.59476	2.07521	1.13706	4.95166	0.246688	2.1778	1.15452	0.754898	3
522046	Q9H3U1	UNC45 homolog A (UNC-45A) (Smooth muscle cell-associated protein 1) (SMAP-1) - Homo sapiens (Human)	UN45A_HUMAN	N	0.371459	2.79271	1.57558	3.99672	6.48502	1	0.929902	0.953204	0.554595	0.475635	3
515104	Q9NQT8	Kinesin-like protein KIF13B (Kinesin-like protein GAKIN) - Homo sapiens (Human)	KI13B_HUMAN	N	0.372013	1	1	3.99672	3.62555	1	4.68871	0.621248	0.855831	1	3
515790	Q8NHL6	Leukocyte immunoglobulin-like receptor subfamily B member 1 precursor (Leukocyte immunoglobulin-like receptor 1) (LIR-1) (Immunoglobulin-like transcript 2) (ILT-2) (Monocyte/macrophage immunoglobulin-like receptor 7) (MIR-7) (CD85j ant	LIRB1_HUMAN	Y	0.37294	1	4.89129	3.99672	0.734147	8.62501	1	1	1	1	3
515412	P01600	Ig kappa chain V-I region Hau - Homo sapiens (Human)	KV1H_HUMAN	N	0.374038	1.94851	2.06078	0.399759	1.70368	1.06772	2.49257	1.35412	1	2.00677	3
515422	P01610	Ig kappa chain V-I region WEA - Homo sapiens (Human)	KV1R_HUMAN	N	0.374038	1.94851	2.06078	0.399759	1.70368	1.06772	2.49257	1.35412	1	2.00677	3
515429	P80362	Ig kappa chain V-I region WAT - Homo sapiens (Human)	KV1Y_HUMAN	N	0.374038	1.94851	2.06078	0.399759	1.70368	1.06772	2.49257	1.35412	1	2.00677	3
517389	Q96RQ9	L-amino-acid oxidase precursor (EC 1.4.3.2) (LAAO) (Interleukin-4-induced protein 1) (IL4-induced protein 1) (Protein Fig-1) (hFIG1) - Homo sapiens (Human)	OXLA_HUMAN	N	0.37537	0.663644	2.32875	0.367267	1	13.8847	2.66038	1.79217	1	0.918332	3
520554	Q13596	Sorting nexin-1 - Homo sapiens (Human)	SNX1_HUMAN	N	0.375561	3.40269	0.993203	1.62304	1.41038	2.50807	1.66078	2.11903	0.505486	0.15941	3
514883	Q15811	Intersectin-1 (SH3 domain-containing protein 1A) (SH3P17) - Homo sapiens (Human)	ITSN1_HUMAN	N	0.377173	1	4.89129	1	1.23335	8.76789	1.48824	4.78274	0.863978	0.25055	3
508563	Q8IZP0	Abl interactor 1 (Abelson interactor 1) (Abi-1) (Spectrin SH3 domain-binding protein 1) (Eps8 SH3 domain-binding protein) (Eps8-binding protein) (e3B1) (Nap1-binding protein) (Nap1BP) (Abl-binding protein 4) (AblBP4) - Homo sapiens (Hum	ABI1_HUMAN	N	0.37907	2.24806	0.725162	10.6383	0.928423	6.43303	0.678187	1.12357	0.767981	1.76226	3
517089	P56975	Pro-neuregulin-3, membrane-bound isoform precursor (Pro-NRG3) [Contains: Neuregulin-3 (NRG-3)] - Homo sapiens (Human)	NRG3_HUMAN	Y	0.380336	1	1	3.99672	3.11483	1	3.02769	1.19433	1	0.25055	3
522684	Q9Y4P8	WD repeat domain phosphoinositide-interacting protein 2 (WIPI-2) (WIPI49-like protein 2) - Homo sapiens (Human)	WIPI2_HUMAN	N	0.381111	4.79812	0.32212	3.99672	0.265425	1	6.05538	1	1	1	3
508390	Q31612	HLA class I histocompatibility antigen, B-73 alpha chain precursor (MHC class I antigen B*73) - Homo sapiens (Human)	1B73_HUMAN	Y	0.381958	2.33618	4.76121	1.53927	1.45492	0.772963	0.623321	1.1013	3.91951	0.679169	3
518859	Q92620	Pre-mRNA-splicing factor ATP-dependent RNA helicase PRP16 (EC 3.6.1.-) (ATP-dependent RNA helicase DHX38) (DEAH box protein 38) - Homo sapiens (Human)	PRP16_HUMAN	N	0.390054	1	0.274675	3.48722	1.18305	4.24106	17.8297	1	1.18389	0.892822	3
513802	O00291	Huntingtin-interacting protein 1 (HIP-I) - Homo sapiens (Human)	HIP1_HUMAN	N	0.390584	3.40269	0.142588	12.6367	0.907458	1	1	0.37762	0.0929515	3.51679	3
510057	P49662	Caspase-4 precursor (EC 3.4.22.-) (CASP-4) (ICH-2 protease) (TX protease) (ICE(rel)-II) [Contains: Caspase-4 subunit 1; Caspase-4 subunit 2] - Homo sapiens (Human)	CASP4_HUMAN	N	0.391079	3.40269	0.296512	1	6.22966	1	4.68871	0.30297	1	1	3
514367	Q00613	Heat shock factor protein 1 (HSF 1) (Heat shock transcription factor 1) (HSTF 1) - Homo sapiens (Human)	HSF1_HUMAN	N	0.39225	0.80848	0.787791	2.32481	1	4.38395	2.41784	1.34405	0.15697	1.70976	3
514002	P16403	Histone H1.2 (Histone H1d) - Homo sapiens (Human)	H12_HUMAN	N	0.393311	0.730575	2.05353	1.27365	0.668956	0.8062	1.37748	1.05335	2.37155	2.26511	3
509398	Q92485	Acid sphingomyelinase-like phosphodiesterase 3b precursor (EC 3.1.4.-) (ASM-like phosphodiesterase 3b) - Homo sapiens (Human)	ASM3B_HUMAN	N	0.393504	0.217355	1	3.99672	1	8.62501	0.595121	0.940726	2.86247	1.26596	3
514004	P10412	Histone H1.4 (Histone H1b) - Homo sapiens (Human)	H14_HUMAN	N	0.393677	0.730575	2.05066	1.27365	0.66693	0.810606	1.37748	1.05335	2.37155	2.26511	3
511161	P50416	Carnitine O-palmitoyltransferase I, liver isoform (EC 2.3.1.21) (CPT I) (CPTI-L) (Carnitine palmitoyltransferase 1A) - Homo sapiens (Human)	CPT1A_HUMAN	Y	0.393899	0.702593	0.640075	0.917322	0.749877	7.22427	0.667068	2.7002	3.46787	0.554876	3
514003	P16402	Histone H1.3 (Histone H1c) - Homo sapiens (Human)	H13_HUMAN	N	0.394912	0.728398	2.05442	1.27022	0.669221	0.810369	1.39338	1.03876	2.35907	2.23873	3
510777	Q96JB5	CDK5 regulatory subunit-associated protein 3 (CDK5 activator-binding protein C53) (HSF-27 protein) - Homo sapiens (Human)	CK5P3_HUMAN	N	0.395119	1.39635	1.98641	8.63996	1.37569	6.50448	7.86357	0.0977063	0.913466	0.337435	3
517611	Q9H4L5	Oxysterol-binding protein-related protein 3 (OSBP-related protein 3) (ORP-3) - Homo sapiens (Human)	OSBL3_HUMAN	N	0.395444	1	1	3.99672	1	1	6.05538	4.78274	1.02158	0.4581	3
517217	P46459	Vesicle-fusing ATPase (EC 3.6.4.6) (Vesicular-fusion protein NSF) (N-ethylmaleimide sensitive fusion protein) (NEM-sensitive fusion protein) - Homo sapiens (Human)	NSF_HUMAN	N	0.39797	0.79371	2.13694	0.814849	1.07167	1.50849	4.00084	3.40959	0.718264	1.12117	3
520997	Q03518	Antigen peptide transporter 1 (APT1) (Peptide transporter TAP1) (ATP-binding cassette sub-family B member 2) (Peptide transporter PSF1) (Peptide supply factor 1) (PSF-1) (Peptide transporter involved in antigen processing 1) - Homo sapi	TAP1_HUMAN	Y	0.398727	0.796185	11.6437	2.40593	0.65418	1.24694	1.82504	1.3058	3.99098	0.83839	3
521351	Q15554	Telomeric repeat-binding factor 2 (TTAGGG repeat-binding factor 2) (Telomeric DNA-binding protein) - Homo sapiens (Human)	TERF2_HUMAN	N	0.399071	0.80848	1.90858	1.71671	7.25111	4.38395	1	0.196692	3.66939	0.66665	3
512019	Q99615	DnaJ homolog subfamily C member 7 (Tetratricopeptide repeat protein 2) (TPR repeat protein 2) - Homo sapiens (Human)	DNJC7_HUMAN	N	0.400004	0.465451	0.32212	7.99345	1.39746	17.3215	1.12456	2.89806	0.17708	0.233781	3
517844	Q9BYG5	Partitioning defective 6 homolog beta (PAR-6 beta) (PAR-6B) - Homo sapiens (Human)	PAR6B_HUMAN	N	0.403604	0.443755	0.0248741	1	1	1	6.05538	6.49242	3.66939	0.831919	3
520002	P02735	Serum amyloid A protein precursor (SAA) [Contains: Amyloid protein A (Amyloid fibril protein AA); Serum amyloid protein A(2-104); Serum amyloid protein A(3-104); Serum amyloid protein A(2-103); Serum amyloid protein A(2-102); Serum amylo	SAA_HUMAN	N	0.403957	4.10041	10.8163	1	1	0.146	3.02769	1	1	1	3
513686	P36969	Phospholipid hydroperoxide glutathione peroxidase, mitochondrial precursor (EC 1.11.1.12) (PHGPx) (GPX-4) - Homo sapiens (Human)	GPX4_HUMAN	N	0.404875	2.08579	1	0.29084	1.23335	3.39753	1	4.78274	1.39339	0.25055	3
516482	Q99836	Myeloid differentiation primary response protein MyD88 - Homo sapiens (Human)	MYD88_HUMAN	N	0.40522	1	1	3.99672	1	1	0.886795	4.10105	3.66939	0.219115	3
510707	P42772	Cyclin-dependent kinase 4 inhibitor B (p14-INK4b) (p15-INK4b) (p15INK4B) (Multiple tumor suppressor 2) (MTS2) - Homo sapiens (Human)	CDN2B_HUMAN	N	0.408742	1	1	0.29084	3.62555	13.1518	1.27059	1	2.36777	0.25055	3
522455	P02774	Vitamin D-binding protein precursor (DBP) (Group-specific component) (Gc-globulin) (VDB) - Homo sapiens (Human)	VTDB_HUMAN	N	0.411269	2.30502	12.8452	0.86185	0.692195	1.85352	0.689379	0.819495	0.123456	2.4409	3
516100	Q9UEW3	Macrophage receptor MARCO (Macrophage receptor with collagenous structure) (Scavenger receptor class A member 2) - Homo sapiens (Human)	MARCO_HUMAN	Y	0.41127	1	1	1.44171	0.826449	47.3661	3.17486	2.89806	1	1	3
511060	P0C0L4	Complement C4-A precursor (Acidic complement C4) [Contains: Complement C4 beta chain; Complement C4-A alpha chain; C4a anaphylatoxin; C4b-A; C4d-A; Complement C4 gamma chain] - Homo sapiens (Human)	CO4A_HUMAN	N	0.411779	0.955159	8.2523	1.16494	1.03643	0.911782	3.5723	4.17456	0.0294523	1.93215	3
520410	Q9BY50	Microsomal signal peptidase 21 kDa subunit (EC 3.4.-.-) (SPase 21 kDa subunit) (SPC21) (SEC11-like 3) - Homo sapiens (Human)	SPC21_HUMAN	Y	0.412924	0.217355	1	3.99672	0.779626	12.7232	1	4.10105	0.575986	0.822158	3
522789	Q9Y6X8	Zinc fingers and homeoboxes protein 2 (Zinc finger and homeodomain protein 2) (Alpha-fetoprotein regulator 1) (AFP regulator 1) (Regulator of AFP) - Homo sapiens (Human)	ZHX2_HUMAN	N	0.41372	3.40269	0.75518	1	1	1	3.02769	1	2.39459	1	3
519320	O94763	RNA polymerase II subunit 5-mediating protein (RPB5-mediating protein) - Homo sapiens (Human)	RMP_HUMAN	N	0.415717	1	0.16106	1	6.74038	4.24106	0.929902	1	11.0082	0.25055	3
511081	P0C0L5	Complement C4-B precursor (Basic complement C4) [Contains: Complement C4 beta chain; Complement C4-B alpha chain; C4a anaphylatoxin; C4b-B; C4d-B; Complement C4 gamma chain] - Homo sapiens (Human)	CO4B_HUMAN	N	0.416508	0.955159	8.15509	1.16494	1.03643	0.908875	3.5723	4.17456	0.0294523	1.93215	3
514172	Q86YV9	Hermansky-Pudlak syndrome 6 protein (Ruby-eye protein homolog) (Ru) - Homo sapiens (Human)	HPS6_HUMAN	N	0.417674	0.217355	0.274675	0.29084	0.802498	4.38395	6.05538	0.358641	0.134758	5.41515	3
513168	Q9UJY4	ADP-ribosylation factor-binding protein GGA2 (Golgi-localized, gamma ear-containing, ARF-binding protein 2) (Gamma-adaptin-related protein 2) (VHS domain and ear domain of gamma-adaptin) (Vear) - Homo sapiens (Human)	GGA2_HUMAN	N	0.419892	0.253737	0.104369	6.6416	0.584719	4.24106	0.886795	0.817342	0.140963	7.03359	3
516915	O43674	NADH dehydrogenase [ubiquinone] 1 beta subcomplex subunit 5, mitochondrial precursor (EC 1.6.5.3) (EC 1.6.99.3) (NADH-ubiquinone oxidoreductase SGDH subunit) (Complex I-SGDH) (CI-SGDH) - Homo sapiens (Human)	NDUB5_HUMAN	Y	0.420816	4.79812	0.834983	1	0.62887	4.24106	1	1	1	2.12084	3
513320	P35573	Glycogen debranching enzyme (Glycogen debrancher) [Includes: 4-alpha-glucanotransferase (EC 2.4.1.25) (Oligo-1,4-1,4-glucantransferase); Amylo-alpha-1,6-glucosidase (EC 3.2.1.33) (Amylo-1,6-glucosidase) (Dextrin 6-alpha-D-glucosidase)] -	GDE_HUMAN	N	0.423169	0.387422	0.064424	3.282	1.02584	0.619195	4.07679	0.478719	0.55319	12.5887	3
511135	P21964	Catechol O-methyltransferase (EC 2.1.1.6) - Homo sapiens (Human)	COMT_HUMAN	Y	0.424111	2.10888	3.34417	0.657445	0.694116	1.86764	1.17163	2.53991	0.890353	0.867851	3
513708	Q9BVP2	Guanine nucleotide-binding protein-like 3 (Nucleolar GTP-binding protein 3) (Nucleostemin) (E2-induced gene 3-protein) (Novel nucleolar protein 47) (NNP47) - Homo sapiens (Human)	GNL3_HUMAN	N	0.426469	3.40269	0.16106	1	3.11483	1	0.219062	0.485256	0.365386	10.5504	3
519439	Q6DKI1	Ribosomal protein L7-like 1 - Homo sapiens (Human)	RL7L_HUMAN	N	0.428615	0.217355	0.120521	0.728304	2.59454	4.38395	0.194856	0.920003	2.66093	0.859845	3
510632	P32320	Cytidine deaminase (EC 3.5.4.5) (Cytidine aminohydrolase) - Homo sapiens (Human)	CDD_HUMAN	N	0.429947	1	1	4.42925	1.48696	4.3125	0.292895	2.48499	1	1	3
520929	Q15031	Probable leucyl-tRNA synthetase, mitochondrial precursor (EC 6.1.1.4) (Leucine--tRNA ligase) (LeuRS) - Homo sapiens (Human)	SYLM_HUMAN	N	0.43113	1	1.05039	1.83467	0.440608	0.09767	2.57221	1.21794	3.66939	3.1541	3
517447	Q15070	Inner membrane protein OXA1L, mitochondrial precursor (Oxidase assembly 1-like protein) (OXA1-like protein) (OXA1Hs) (Hsa) - Homo sapiens (Human)	OXA1L_HUMAN	Y	0.431817	6.80538	1.51242	0.0969467	1.55925	1	2.66038	0.30297	1.18389	7.59345	3
515414	P01602	Ig kappa chain V-I region HK102 precursor (Fragment) - Homo sapiens (Human)	KV1J_HUMAN	N	0.432317	1	1.34352	0.247079	3.11483	1	0.486504	4.78274	1	9.35184	3
517214	Q14978	Nucleolar phosphoprotein p130 (Nucleolar 130 kDa protein) (140 kDa nucleolar phosphoprotein) (Nopp140) (Nucleolar and coiled-body phosphoprotein 1) - Homo sapiens (Human)	NOLC1_HUMAN	N	0.43263	0.3224	0.791308	0.773183	1.93784	1.69876	0.553354	7.63624	2.18268	2.70784	3
514679	P09913	Interferon-induced protein with tetratricopeptide repeats 2 (IFIT-2) (Interferon-induced 54 kDa protein) (IFI-54K) (ISG-54 K) - Homo sapiens (Human)	IFIT2_HUMAN	N	0.436739	1	1	3.48722	10.1106	1.15873	3.02769	0.148491	1	1	3
509051	P02652	Apolipoprotein A-II precursor (Apo-AII) (ApoA-II) [Contains: Apolipoprotein A-II(1-76)] - Homo sapiens (Human)	APOA2_HUMAN	N	0.441303	9.20444	4.4689	1.04809	3.11483	1.68573	0.593334	0.799867	0.0855345	1.152	3
518797	O00743	Serine/threonine-protein phosphatase 6 (EC 3.1.3.16) (PP6) - Homo sapiens (Human)	PPP6_HUMAN	N	0.443492	0.644243	1.31798	2.89746	2.43714	1.36743	0.194989	1.17271	0.122788	3.08233	3
511723	P09417	Dihydropteridine reductase (EC 1.5.1.34) (HDHPR) (Quinoid dihydropteridine reductase) - Homo sapiens (Human)	DHPR_HUMAN	N	0.444083	1.0725	1.51036	3.99672	1.55925	21.4196	0.591196	0.17612	2.27421	1.49193	3
519727	Q16799	Reticulon-1 (Neuroendocrine-specific protein) - Homo sapiens (Human)	RTN1_HUMAN	Y	0.444191	1	5.40817	0.479157	1.55485	12.9375	4.83588	1.44903	1	1	3
512631	Q8IVS2	Malonyl CoA-acyl carrier protein transacylase, mitochondrial precursor (EC 2.3.1.39) (MCT) (Mitochondrial malonyltransferase) - Homo sapiens (Human)	FABD_HUMAN	N	0.44439	0.707668	0.0641904	1	8.2978	0.85636	0.180289	0.431197	9.70338	2.97572	3
522500	Q96AX1	Vacuolar protein sorting-associated protein 33A (hVPS33A) - Homo sapiens (Human)	VP33A_HUMAN	N	0.445326	1	4.72675	0.29084	0.690679	8.62501	1	2.24715	1.18389	0.233781	3
519363	P07998	Ribonuclease pancreatic precursor (EC 3.1.27.5) (RNase 1) (RNase A) (RNase UpI-1) (RIB-1) (HP-RNase) - Homo sapiens (Human)	RNAS1_HUMAN	Y	0.449385	1	1	0.29084	0.854717	4.24106	3.02769	4.10105	1	1	3
508793	P06280	Alpha-galactosidase A precursor (EC 3.2.1.22) (Melibiase) (Alpha-D-galactoside galactohydrolase) (Alpha-D-galactosidase A) (Agalsidase alfa) - Homo sapiens (Human)	AGAL_HUMAN	N	0.449418	1	1.796	0.0784263	0.618321	51.6786	2.03355	1.44903	0.627464	3.65676	3
517227	Q9BW91	ADP-ribose pyrophosphatase, mitochondrial precursor (EC 3.6.1.13) (ADP-ribose diphosphatase) (Adenosine diphosphoribose pyrophosphatase) (ADPR-PPase) (ADP-ribose phosphohydrolase) (Nucleoside diphosphate-linked moiety X motif 9) (Nudix	NUDT9_HUMAN	N	0.451083	4.79812	1.45032	1	0.843542	1	3.17486	0.151485	1	3.28863	3
523284	Q8N9F8	Zinc finger protein 454 - Homo sapiens (Human)	ZN454_HUMAN	N	0.452358	1	1	7.99345	3.11483	1	1	4.78274	0.399098	0.8876	3
517970	O75914	Serine/threonine-protein kinase PAK 3 (EC 2.7.11.1) (p21-activated kinase 3) (PAK-3) (Beta-PAK) (Oligophrenin-3) - Homo sapiens (Human)	PAK3_HUMAN	N	0.454051	2.73193	0.0771964	2.39695	1.54213	15.058	1.09334	0.476602	0.752957	0.854879	3
518429	Q08752	40 kDa peptidyl-prolyl cis-trans isomerase (EC 5.2.1.8) (PPIase) (Rotamase) (Cyclophilin-40) (CYP-40) (Cyclophilin-related protein) - Homo sapiens (Human)	PPID_HUMAN	N	0.457711	0.917297	0.0318787	0.214765	9.34448	4.24106	1.11153	1	0.495741	3.51679	3
514513	P01591	Immunoglobulin J chain - Homo sapiens (Human)	IGJ_HUMAN	N	0.460361	1	0.993203	0.805216	3.62555	4.22598	0.118996	4.10105	1.03449	1.29868	3
522141	P05161	Interferon-induced 17 kDa protein precursor [Contains: Ubiquitin cross-reactive protein (hUCRP) (Interferon-induced 15 kDa protein)] - Homo sapiens (Human)	UCRP_HUMAN	N	0.462818	0.742091	5.92505	0.922433	1.8305	2.88255	0.987276	1.89697	1	3.32768	3
518441	Q9Y3B4	Pre-mRNA branch site protein p14 (SF3B 14 kDa subunit) - Homo sapiens (Human)	PM14_HUMAN	N	0.462852	2.04403	2.25212	4.76326	1.0481	1.25768	1.25862	0.621838	0.741291	0.551099	3
508808	P55196	Afadin (Protein AF-6) - Homo sapiens (Human)	AFAD_HUMAN	N	0.463998	0.445622	0.0199792	1	3.11483	0.106282	0.549207	4.17856	2.40692	1.18691	3
514512	P01861	Ig gamma-4 chain C region - Homo sapiens (Human)	IGHG4_HUMAN	N	0.464997	2.11294	2.28965	0.867408	0.987223	2.03579	0.876587	1.20409	0.242297	1.12701	3
522315	P25490	Transcriptional repressor protein YY1 (Yin and yang 1) (YY-1) (Delta transcription factor) (NF-E1) - Homo sapiens (Human)	TYY1_HUMAN	N	0.465255	2.21878	0.37759	4.64323	0.265425	1	7.86357	0.347002	0.122788	0.541205	3
511117	Q9H0A8	COMM domain-containing protein 4 - Homo sapiens (Human)	COMD4_HUMAN	N	0.466953	0.2376	1	1	0.779626	4.24106	3.02769	1	1	3.65676	3
518410	Q16512	Serine/threonine-protein kinase N1 (EC 2.7.11.13) (Protein kinase C-like 1) (Protein-kinase C-related kinase 1) (Protein kinase C-like PKN) (Serine-threonine protein kinase N) (Protein kinase PKN-alpha) - Homo sapiens (Human)	PKN1_HUMAN	N	0.468375	1	1	6.6416	2.40424	0.842405	1	2.32927	0.134758	1	3
516281	P14780	Matrix metalloproteinase-9 precursor (EC 3.4.24.35) (MMP-9) (92 kDa type IV collagenase) (92 kDa gelatinase) (Gelatinase B) (GELB) [Contains: 67 kDa matrix metalloproteinase-9; 82 kDa matrix metalloproteinase-9] - Homo sapiens (Human)	MMP9_HUMAN	N	0.468576	4.17158	11.8501	0.237927	0.412757	0.630713	4.83588	0.283592	1	1	3
514133	P84074	Neuron-specific calcium-binding protein hippocalcin (Calcium-binding protein BDR-2) - Homo sapiens (Human)	HPCA_HUMAN	N	0.471879	3.49279	0.192571	1.15177	2.20362	4.38395	0.598904	1.34405	1.70113	0.25055	3
514134	P37235	Hippocalcin-like protein 1 (Visinin-like protein 3) (VILIP-3) (Calcium-binding protein BDR-1) (HLP2) - Homo sapiens (Human)	HPCL1_HUMAN	N	0.471879	3.49279	0.192571	1.15177	2.20362	4.38395	0.598904	1.34405	1.70113	0.25055	3
522040	Q9Y4E8	Ubiquitin carboxyl-terminal hydrolase 15 (EC 3.1.2.15) (Ubiquitin thioesterase 15) (Ubiquitin-specific-processing protease 15) (Deubiquitinating enzyme 15) (Unph-2) (Unph4) - Homo sapiens (Human)	UBP15_HUMAN	N	0.473276	0.2376	0.6191	4.7939	1.15605	3.28502	1.39267	1.34472	0.164827	2.72771	3
516029	P51608	Methyl-CpG-binding protein 2 (MeCP-2 protein) (MeCP2) - Homo sapiens (Human)	MECP2_HUMAN	N	0.479007	0.149139	0.518815	4.64323	1.20375	0.313961	1.15156	1.83848	19.9367	22.1614	3
510731	P01031	Complement C5 precursor [Contains: Complement C5 beta chain; Complement C5 alpha chain; C5a anaphylatoxin; Complement C5 alpha' chain] - Homo sapiens (Human)	CO5_HUMAN	N	0.479582	1	3.96676	0.706656	1.43929	0.43613	0.708203	3.24729	1	14.907	3
520625	P78362	Serine/threonine-protein kinase SRPK2 (EC 2.7.11.1) (Serine/arginine-rich protein-specific kinase 2) (SR-protein-specific kinase 2) (SFRS protein kinase 2) - Homo sapiens (Human)	SRPK2_HUMAN	N	0.479927	0.15363	0.32212	3.48722	7.25111	1	0.74412	1.42039	3.93434	1	3
512635	P05413	Fatty acid-binding protein, heart (H-FABP) (Heart-type fatty acid-binding protein) (Muscle fatty acid-binding protein) (M-FABP) (Mammary-derived growth inhibitor) (MDGI) - Homo sapiens (Human)	FABPH_HUMAN	N	0.480363	1	0.16106	1	2.43121	3.62706	0.126926	1	2.79586	0.630607	3
519002	P11498	Pyruvate carboxylase, mitochondrial precursor (EC 6.4.1.1) (Pyruvic carboxylase) (PCB) - Homo sapiens (Human)	PYC_HUMAN	N	0.48171	1.90031	1	0.675219	1.92462	0.42818	2.03456	17.4267	2.5991	0.998107	3
512331	P41567	Eukaryotic translation initiation factor 1 (eIF1) (Protein translation factor SUI1 homolog) (Sui1iso1) (A121) - Homo sapiens (Human)	EIF1_HUMAN	N	0.483003	4.10041	0.609188	0.858356	1.43929	4.24106	11.3328	0.464285	1.29955	0.440566	3
508821	Q8WYP5	AT-hook-containing transcription factor 1 (Embryonic large molecule derived from yolk sac) - Homo sapiens (Human)	AHTF1_HUMAN	N	0.483156	0.108677	1.45032	1	3.62555	1	3.02769	0.291225	0.247871	3.79672	3
512156	Q9UHL4	Dipeptidyl-peptidase 2 precursor (EC 3.4.14.2) (Dipeptidyl-peptidase II) (DPP II) (Dipeptidyl aminopeptidase II) (Quiescent cell proline dipeptidase) (Dipeptidyl peptidase 7) - Homo sapiens (Human)	DPP2_HUMAN	N	0.4837	2.37043	1.21257	0.623529	0.648189	12.5813	1.20519	0.960821	1.70997	8.93195	3
511267	P78329	Cytochrome P450 4F2 (EC 1.14.13.30) (CYPIVF2) (Leukotriene-B(4) omega-hydroxylase) (Leukotriene-B(4) 20-monooxygenase) (Cytochrome P450-LTB-omega) - Homo sapiens (Human)	CP4F2_HUMAN	Y	0.489188	1	1	0.29084	1	4.24106	0.292895	0.30297	3.66939	10.9703	3
508979	O14497	AT-rich interactive domain-containing protein 1A (ARID domain-containing protein 1A) (SWI/SNF-related, matrix-associated, actin-dependent regulator of chromatin subfamily F member 1) (SWI-SNF complex protein p270) (B120) (SWI-like prot	ARI1A_HUMAN	N	0.489787	1	0.32212	1	3.37019	1	3.17486	9.56549	0.123523	1.23324	3
522327	P17948	Vascular endothelial growth factor receptor 1 precursor (EC 2.7.10.1) (VEGFR-1) (Vascular permeability factor receptor) (Tyrosine-protein kinase receptor FLT) (Flt-1) (Tyrosine-protein kinase FRT) (Fms-like tyrosine kinase 1) - Homo sa	VGFR1_HUMAN	N	0.490926	2.35275	1	1	3.62555	4.38395	0.711154	1	1	0.25055	3
513925	P01912	HLA class II histocompatibility antigen, DR-1 beta chain precursor (Clone P2-beta-3) - Homo sapiens (Human)	HB2B_HUMAN	Y	0.493274	0.787839	31.9321	1.09882	0.847384	2.13867	3.26115	1.30028	1	1.22286	3
518107	O75381	Peroxisomal membrane protein PEX14 (Peroxin-14) (Peroxisomal membrane anchor protein PEX14) (PTS1 receptor docking protein) - Homo sapiens (Human)	PEX14_HUMAN	N	0.495039	11.6035	0.636192	0.247079	1.78907	4.24106	6.64408	0.666164	0.850567	0.442239	3
520275	Q96FS4	Signal-induced proliferation-associated protein 1 (Sipa-1) (GTPase-activating protein Spa-1) (p130 SPA-1) - Homo sapiens (Human)	SIPA1_HUMAN	N	0.495354	0.217355	0.787791	3.99672	1.03233	4.24106	9.96612	1	1	1	3
515440	Q9NS86	LanC-like protein 2 (Testis-specific adriamycin sensitivity protein) - Homo sapiens (Human)	LANC2_HUMAN	N	0.497021	0.629946	0.954288	7.99345	1.78907	4.3125	0.0732238	0.0757425	0.17708	7.03359	3
519647	Q9HCY8	Protein S100-A14 (S100 calcium-binding protein A14) (S114) - Homo sapiens (Human)	S10AE_HUMAN	N	0.49744	2.08671	1.45032	0.310144	1.10122	4.3125	0.104322	0.855068	21.5064	1.50422	3
509276	Q9H1Y0	Autophagy protein 5 (APG5-like) (Apoptosis-specific protein) - Homo sapiens (Human)	ATG5_HUMAN	N	0.500339	1	0.32212	5.28975	1.29727	4.24106	0.253853	2.07028	1	1	3
518005	Q86U86	Protein polybromo-1 (hPB1) (Polybromo-1D) (BRG1-associated factor 180) (BAF180) - Homo sapiens (Human)	PB1_HUMAN	N	0.500618	3.40269	1.34352	1	3.37019	1	3.02769	0.30297	1.03449	0.8876	3
522590	O75695	Protein XRP2 - Homo sapiens (Human)	XRP2_HUMAN	N	0.505315	3.40269	1	10.6383	0.320771	8.48212	1	0.291225	1	1	3
520590	Q8IYB5	Stromal membrane-associated protein 1 - Homo sapiens (Human)	SMAP1_HUMAN	N	0.510819	3.40269	1	1	1	4.24106	3.32204	1	0.17708	1	3
520285	O75368	SH3 domain-binding glutamic acid-rich-like protein - Homo sapiens (Human)	SH3L1_HUMAN	N	0.515924	0.193126	3.31766	7.99345	1.1972	2.04374	1.90291	1.31916	1.30833	0.440566	3
521314	Q9HBL0	Tensin-1 - Homo sapiens (Human)	TENS1_HUMAN	N	0.520799	0.964609	1	0.0969467	0.540282	2.56908	1	13.3257	3.24888	0.25055	3
522227	O60701	UDP-glucose 6-dehydrogenase (EC 1.1.1.22) (UDP-Glc dehydrogenase) (UDP-GlcDH) (UDPGDH) - Homo sapiens (Human)	UGDH_HUMAN	N	0.521975	2.00475	0.636014	0.34655	1.47467	23.6116	3.00699	0.453659	1.00729	1.01373	3
518808	P40306	Proteasome subunit beta type 10 precursor (EC 3.4.25.1) (Proteasome MECl-1) (Macropain subunit MECl-1) (Multicatalytic endopeptidase complex subunit MECl-1) - Homo sapiens (Human)	PSB10_HUMAN	N	0.522762	1.5605	2.55388	2.2107	0.876698	0.571565	1.33019	2.15135	1	0.897464	3
508573	Q9NRK6	ATP-binding cassette sub-family B member 10, mitochondrial precursor (ATP-binding cassette transporter 10) (ABC transporter 10 protein) (Mitochondrial ATP-binding cassette 2) (M-ABC2) - Homo sapiens (Human)	ABCBA_HUMAN	Y	0.523105	1	0.32212	1	6.22966	4.24106	1	0.199301	3.66939	1	3
522164	O14933	Ubiquitin-conjugating enzyme E2 L6 (EC 6.3.2.19) (Ubiquitin-protein ligase L6) (Ubiquitin carrier protein L6) (UbcH8) (Retinoic acid-induced gene B protein) (RIG-B) - Homo sapiens (Human)	UB2L6_HUMAN	N	0.523701	0.62703	0.296512	1.15315	2.16773	2.12649	6.64408	0.688423	1.16373	1.26695	3
513815	P04225	HLA class II histocompatibility antigen, DQ(4) alpha chain precursor (DQ-DRW9 alpha chain) (Fragment) - Homo sapiens (Human)	HA24_HUMAN	Y	0.523836	0.772503	25.1121	0.938079	1.41416	2.92748	0.929902	2.63832	1	0.854879	3
508687	Q9NUB1	Acetyl-coenzyme A synthetase 2-like, mitochondrial precursor (EC 6.2.1.1) (Acetate--CoA ligase 2) (Acetyl-CoA synthetase 2) (Acyl-CoA synthetase short-chain family member 1) - Homo sapiens (Human)	ACS2L_HUMAN	N	0.525549	4.10041	0.120521	1.38899	1.77304	1	0.115521	0.574973	7.61493	3.79787	3
513788	Q92896	Golgi apparatus protein 1 precursor (Golgi sialoglycoprotein MG-160) (E-selectin ligand 1) (ESL-1) (Cysteine-rich fibroblast growth factor receptor) (CFR-1) - Homo sapiens (Human)	GSLG1_HUMAN	Y	0.526073	2.64491	1.76701	5.10735	0.96007	1.41772	3.82254	0.727333	0.933644	0.773433	3
512012	Q05193	Dynamin-1 (EC 3.6.5.5) - Homo sapiens (Human)	DYN1_HUMAN	N	0.526445	2.25841	0.57105	2.96252	18.6637	0.361031	0.449994	0.930424	0.523191	0.901405	3
513791	P01908	HLA class II histocompatibility antigen, DQ(1) alpha chain precursor (DC-4 alpha chain) - Homo sapiens (Human)	HA21_HUMAN	Y	0.529087	0.772503	22.6664	0.994665	1.41416	2.92748	0.929902	2.63832	1	0.854879	3
521033	Q9UH65	Switch-associated protein 70 (SWAP-70) - Homo sapiens (Human)	SWP70_HUMAN	N	0.530929	0.217355	1	5.02569	1.7632	0.828449	3.17486	2.84077	0.17708	0.25055	3
513683	P07203	Glutathione peroxidase 1 (EC 1.11.1.9) (GSHPx-1) (GPx-1) (Cellular glutathione peroxidase) - Homo sapiens (Human)	GPX1_HUMAN	N	0.531462	1.35297	2.24363	0.810957	0.812274	2.23505	0.588849	1.03954	2.40913	0.899904	3
508479	P56378	6.8 kDa mitochondrial proteolipid - Homo sapiens (Human)	68MP_HUMAN	Y	0.53165	0.227027	1.75685	1	3.11483	1	3.02769	0.30297	0.281925	10.5504	3
516584	P12883	Myosin heavy chain, cardiac muscle beta isoform (MyHC-beta) - Homo sapiens (Human)	MYH7_HUMAN	N	0.531958	1.86562	0.296512	0.450146	1.13511	4.24106	3.02769	0.615046	7.86869	0.916201	3
511366	Q5TZA2	Rootletin (Ciliary rootlet coiled-coil protein) - Homo sapiens (Human)	CROCC_HUMAN	N	0.53457	0.739592	0.296512	0.383463	5.18297	4.3125	1.95496	4.78274	1.10919	0.854879	3
522254	Q9BRA2	Thioredoxin-like protein 5 (14 kDa thioredoxin-related protein) (TRP14) (Protein 42-9-9) - Homo sapiens (Human)	TXNL5_HUMAN	N	0.534592	0.954092	1	3.99672	4.19485	30.0446	1.06214	0.30297	0.944564	0.168717	3
517545	Q9BXB4	Oxysterol-binding protein-related protein 11 (OSBP-related protein 11) (ORP-11) - Homo sapiens (Human)	OSB11_HUMAN	N	0.536452	1.0893	0.84484	1.06738	2.20323	8.62501	0.232901	2.40424	0.140963	1.01324	3
508549	Q86UK0	ATP-binding cassette sub-family A member 12 (ATP-binding cassette transporter 12) (ATP-binding cassette 12) - Homo sapiens (Human)	ABCAC_HUMAN	Y	0.542985	9.59624	1	1	0.132712	0.19534	0.111997	4.4419	0.17708	3.79672	3
512680	Q9NZB2	UPF0318 protein FAM120A - Homo sapiens (Human)	F120A_HUMAN	N	0.547699	1.04461	4.89129	0.997204	2.27022	1.25925	2.13873	0.603277	0.340188	0.365194	3
509035	Q15847	Adipose most abundant gene transcript 2 - Homo sapiens (Human)	APM2_HUMAN	N	0.552273	1	1	1	1	0.167104	1	4.10105	2.14072	5.55512	3
509687	P11274	Breakpoint cluster region protein (EC 2.7.11.1) (NY-REN-26 antigen) - Homo sapiens (Human)	BCR_HUMAN	N	0.552656	3.40269	1	3.99672	1	1	2.91903	0.291225	0.281925	1	3
519735	O15514	DNA-directed RNA polymerase II 16 kDa polypeptide (EC 2.7.7.6) (RPB4) - Homo sapiens (Human)	RPB4_HUMAN	N	0.554799	1	3.15117	1	3.11483	0.619195	1	0.296981	3.66939	1	3
523271	Q15942	Zyxin (Zyxin-2) - Homo sapiens (Human)	ZYX_HUMAN	N	0.557442	0.574396	2.63527	2.23836	2.33341	1.46107	1.12611	0.721266	0.550508	1.9153	3
517152	P53384	Nucleotide-binding protein 1 (NBP 1) - Homo sapiens (Human)	NUBP1_HUMAN	N	0.557709	0.227027	1	1	3.62555	4.38395	0.292895	4.78274	1	1	3
521155	Q9NRH3	Tubulin gamma-2 chain (Gamma-2 tubulin) - Homo sapiens (Human)	TBG2_HUMAN	N	0.558176	0.739592	1.45032	3.99672	0.17572	0.989783	3.02769	1.29394	0.172986	3.17433	3
515575	Q8N2G8	Protein D11Lgp1 homolog precursor - Homo sapiens (Human)	LGP1_HUMAN	N	0.560773	1	4.89129	3.99672	0.250295	4.38395	1	1	1	0.678383	3
513770	P00390	Glutathione reductase, mitochondrial precursor (EC 1.8.1.7) (GR) (GRase) - Homo sapiens (Human)	GSHR_HUMAN	N	0.564307	1.04398	2.99489	2.11552	2.44312	0.935056	1.4194	0.775955	1.10641	1.19952	3
510593	Q15057	Centaurin-beta 2 (Cnt-b2) - Homo sapiens (Human)	CENB2_HUMAN	N	0.564875	0.902897	0.274675	1	2.338	12.7232	7.86357	0.473462	0.494481	0.801251	3
516003	P26572	Alpha-1,3-mannosyl-glycoprotein 2-beta-N-acetylglucosaminyltransferase (EC 2.4.1.101) (N-glycosyl-oligosaccharide-glycoprotein N-acetylglucosaminyltransferase I) (GNT-I) (GlcNAc-T I) - Homo sapiens (Human)	MGAT1_HUMAN	Y	0.567857	3.40269	1.74208	7.99345	0.449506	4.3125	1	1	1	0.770582	3
509326	Q13315	Serine-protein kinase ATM (EC 2.7.11.1) (Ataxia telangiectasia mutated) (A-T, mutated) - Homo sapiens (Human)	ATM_HUMAN	N	0.570272	3.40269	1	1	1	4.38395	1	4.10105	0.17708	0.801251	3
521512	Q8IUR0	Trafficking protein particle complex subunit 5 - Homo sapiens (Human)	TPPC5_HUMAN	N	0.571539	0.2376	4.89129	3.99672	3.62555	1	1	0.646796	1	1	3
512561	Q8TE68	Epidermal growth factor receptor kinase substrate 8-like protein 1 (Epidermal growth factor receptor pathway substrate 8-related protein 1) (EPS8-like protein 1) - Homo sapiens (Human)	ES8L1_HUMAN	N	0.57491	4.82553	0.0172173	1.42117	1.10122	6.43303	0.280212	1.14131	2.65589	0.363988	3
515613	Q86X29	Lipolysis-stimulated lipoprotein receptor - Homo sapiens (Human)	LSR_HUMAN	Y	0.575211	1	0.0453399	1.13605	0.881483	8.69645	0.22042	0.30297	2.62513	5.55512	3
515477	O60256	Phosphoribosyl pyrophosphate synthetase-associated protein 2 (PRPP synthetase-associated protein 2) (41 kDa phosphoribosypyrophosphate synthetase-associated protein) (PAP41) - Homo sapiens (Human)	KPRB_HUMAN	N	0.57701	3.40269	0.296512	3.99672	2.59454	0.206398	0.678187	0.493021	1	1	3
509120	O94973	AP-2 complex subunit alpha-2 (Adapter-related protein complex 2 alpha-2 subunit) (Alpha-adaptin C) (Adaptor protein complex AP-2 alpha-2 subunit) (Clathrin assembly protein complex 2 alpha-C large chain) (100 kDa coated vesicle protein	AP2A2_HUMAN	N	0.579999	0.404096	2.92377	0.839544	0.665572	12.3236	1.10749	3.37485	0.521378	1.00681	3
520461	Q5MIZ7	SMEK homolog 2 - Homo sapiens (Human)	SMEK2_HUMAN	N	0.58045	1.09349	0.787791	11.9902	3.62555	0.85636	3.17486	0.148491	0.517246	1.16585	3
512500	P16452	Erythrocyte membrane protein band 4.2 (Erythrocyte protein 4.2) (P4.2) - Homo sapiens (Human)	EPB42_HUMAN	N	0.580952	1	109.642	0.115517	9.34448	0.00615877	0.486504	1	1	31.4324	3
521051	Q5JTZ9	Probable alanyl-tRNA synthetase, mitochondrial precursor (EC 6.1.1.7) (Alanine--tRNA ligase) (AlaRS) (Alanyl-tRNA synthetase like) - Homo sapiens (Human)	SYAM_HUMAN	N	0.584506	0.2376	1.57558	1	0.488102	0.19534	8.15792	1	8.3986	2.43885	3
521458	Q92544	Transmembrane 9 superfamily protein member 4 - Homo sapiens (Human)	TM9S4_HUMAN	Y	0.587034	3.19673	1.16437	0.788561	1.31124	4.3125	1.72088	2.3853	0.480041	0.432893	3
513768	P48637	Glutathione synthetase (EC 6.3.2.3) (Glutathione synthase) (GSH synthetase) (GSH-S) - Homo sapiens (Human)	GSHB_HUMAN	N	0.587575	0.891291	0.107373	3.99672	6.99574	1.87797	4.52019	1	1	0.750934	3
518059	P05165	Propionyl-CoA carboxylase alpha chain, mitochondrial precursor (EC 6.4.1.3) (PCCase subunit alpha) (Propanoyl-CoA:carbon dioxide ligase subunit alpha) - Homo sapiens (Human)	PCCA_HUMAN	N	0.587733	0.227027	0.993203	1.08402	0.962312	0.251326	9.08306	0.464285	4.16388	2.63389	3
513102	Q9NYL4	FK506-binding protein 11 precursor (EC 5.2.1.8) (Peptidyl-prolyl cis-trans isomerase) (PPIase) (Rotamase) (19 kDa FK506-binding protein) (FKBP-19) - Homo sapiens (Human)	FKB11_HUMAN	Y	0.587751	0.227027	1.34352	0.214765	3.11483	0.106282	0.929902	1	4.1993	3.79672	3
522106	Q9BT76	Uroplakin-3B precursor (Uroplakin IIIb) (UPIIIb) (p35) - Homo sapiens (Human)	UPK3B_HUMAN	N	0.589388	0.217355	1	1	1	1	3.02769	0.940726	2.12816	3.51679	3
520624	Q96SB4	Serine/threonine-protein kinase SRPK1 (EC 2.7.11.1) (Serine/arginine-rich protein-specific kinase 1) (SR-protein-specific kinase 1) (SFRS protein kinase 1) - Homo sapiens (Human)	SRPK1_HUMAN	N	0.590465	0.595522	0.32212	7.99345	6.74038	4.24106	0.525124	1.42039	1	0.881132	3
510802	Q9NX76	CKLF-like MARVEL transmembrane domain-containing protein 6 (Chemokine-like factor superfamily member 6) - Homo sapiens (Human)	CKLF6_HUMAN	Y	0.590809	0.570017	1.57558	0.997204	0.962312	6.50448	0.725986	1	2.29308	3.65676	3
522496	Q16864	Vacuolar ATP synthase subunit F (EC 3.6.3.14) (V-ATPase F subunit) (Vacuolar proton pump F subunit) (V-ATPase 14 kDa subunit) - Homo sapiens (Human)	VATF_HUMAN	N	0.593516	1	0.0915583	1.14725	0.779334	4.38395	3.02769	2.02935	0.15697	0.8876	3
516018	P34949	Mannose-6-phosphate isomerase (EC 5.3.1.8) (Phosphomannose isomerase) (PMI) (Phosphohexomutase) - Homo sapiens (Human)	MANA_HUMAN	N	0.593699	3.02056	0.366053	1	11.4126	4.59834	1	0.086067	0.827013	0.854879	3
512807	Q5RI15	Protein FAM36A - Homo sapiens (Human)	FA36A_HUMAN	N	0.594086	1	0.941922	0.997204	3.62555	0.19534	3.02769	0.10099	2.04316	0.493392	3
519553	P62308	Small nuclear ribonucleoprotein G (snRNP-G) (Sm protein G) (Sm-G) (SmG) - Homo sapiens (Human)	RUXG_HUMAN	N	0.59602	1	0.190858	3.99672	1	0.85636	2.97648	1	1.03449	7.50601	3
511708	P01034	Cystatin C precursor (Neuroendocrine basic polypeptide) (Gamma-trace) (Post-gamma-globulin) - Homo sapiens (Human)	CYTC_HUMAN	Y	0.600013	0.513161	1	0.6931	3.11483	8.48212	6.4969	1	1	0.605236	3
508665	O15254	Acyl-coenzyme A oxidase 3, peroxisomal (EC 1.3.3.6) (Pristanoyl-CoA oxidase) (Branched-chain acyl-CoA oxidase) (BRCACox) - Homo sapiens (Human)	ACOX3_HUMAN	N	0.602845	0.418924	4.89129	0.214765	1	4.24106	3.02769	0.30297	1	0.233781	3
516218	Q8N183	Mimitin, mitochondrial precursor (Myc-induced mitochondrial protein) (MMTN) (B17.2-like) (B17.2L) - Homo sapiens (Human)	MIMIT_HUMAN	N	0.602902	0.739592	0.81945	6.6416	2.59454	0.543462	0.575929	2.24715	1.99624	1.0123	3
513484	O94925	Glutaminase kidney isoform, mitochondrial precursor (EC 3.5.1.2) (GLS) (L-glutamine amidohydrolase) (K-glutaminase) - Homo sapiens (Human)	GLSK_HUMAN	N	0.603265	0.370497	4.18272	0.79294	0.761682	0.150587	0.989896	1.60199	3.13411	2.52108	3
509043	P16157	Ankyrin-1 (Erythrocyte ankyrin) (Ankyrin-R) - Homo sapiens (Human)	ANK1_HUMAN	N	0.603819	1	52.9245	0.181658	2.52427	0.0223624	1.11285	1	0.743612	30.8738	3
519559	Q13464	Rho-associated protein kinase 1 (EC 2.7.11.1) (Rho-associated, coiled-coil-containing protein kinase 1) (p160 ROCK-1) (p160ROCK) (NY-REN-35 antigen) - Homo sapiens (Human)	ROCK1_HUMAN	N	0.606914	3.40269	1.26047	1.16241	2.46671	0.19534	1	1	0.217528	8.93195	3
508669	P33121	Long-chain-fatty-acid--CoA ligase 1 (EC 6.2.1.3) (Long-chain acyl-CoA synthetase 1) (LACS 1) (Palmitoyl-CoA ligase 1) (Long-chain fatty acid CoA ligase 2) (Long-chain acyl-CoA synthetase 2) (LACS 2) (Acyl-CoA synthetase 1) (ACS1) (Palm	ACSL1_HUMAN	Y	0.607867	0.474086	7.15432	0.920866	0.57459	12.2637	1.28096	5.83846	1	0.661954	3
518051	Q8WXI9	Transcriptional repressor p66 beta (p66/p68) (GATA zinc finger domain-containing protein 2B) - Homo sapiens (Human)	P66B_HUMAN	N	0.608133	0.715588	0.296512	4.64323	3.62555	1	0.805948	4.10105	0.255994	1.22932	3
513853	Q5T447	Probable E3 ubiquitin-protein ligase HECTD3 (HECT domain-containing protein 3) - Homo sapiens (Human)	HECD3_HUMAN	N	0.610806	1	0.274675	3.99672	1.16915	4.3125	0.223995	1.63985	3.66939	1	3
508427	P30499	HLA class I histocompatibility antigen, Cw-1 alpha chain precursor (MHC class I antigen Cw*1) - Homo sapiens (Human)	1C01_HUMAN	Y	0.612487	0.99236	8.49857	1.20176	1.04215	0.556659	1.56831	2.51438	10.2333	0.580246	3
519345	P40938	Replication factor C subunit 3 (Replication factor C 38 kDa subunit) (RFC38) (Activator 1 38 kDa subunit) (A1 38 kDa subunit) (RF-C 38 kDa subunit) - Homo sapiens (Human)	RFC3_HUMAN	N	0.614909	0.184898	0.32212	7.99345	5.18297	4.24106	0.562282	0.615046	0.767981	0.557482	3
522890	Q9HCL3	Zinc finger protein 14 homolog (Zfp-14) - Homo sapiens (Human)	ZFP14_HUMAN	N	0.615445	1	1	7.99345	6.22966	1	1	9.56549	0.399098	0.8876	3
522898	Q8NHY6	Zinc finger protein 28 homolog (Zfp-28) (Krueppel-like zinc finger factor X6) - Homo sapiens (Human)	ZFP28_HUMAN	N	0.615445	1	1	3.99672	3.11483	1	1	4.78274	0.399098	0.8876	3
522899	Q9Y2G7	Zinc finger protein 30 homolog (Zfp-30) (Zinc finger protein 745) - Homo sapiens (Human)	ZFP30_HUMAN	N	0.615445	1	1	7.99345	6.22966	1	1	9.56549	0.399098	0.8876	3
522936	Q3ZCT1	Zinc finger protein 260 (Zfp-260) - Homo sapiens (Human)	ZN260_HUMAN	N	0.615445	1	1	3.99672	3.11483	1	1	4.78274	0.399098	0.8876	3
522955	P17039	Zinc finger protein 30 (Zinc finger protein KOX28) - Homo sapiens (Human)	ZNF30_HUMAN	N	0.615445	1	1	7.99345	6.22966	1	1	9.56549	0.399098	0.8876	3
522965	Q8N7M2	Zinc finger protein 283 - Homo sapiens (Human)	ZN283_HUMAN	N	0.615445	1	1	3.99672	3.11483	1	1	4.78274	0.399098	0.8876	3
522967	Q8NB42	Zinc finger protein 527 - Homo sapiens (Human)	ZN527_HUMAN	N	0.615445	1	1	3.99672	3.11483	1	1	4.78274	0.399098	0.8876	3
522969	Q8NDQ6	Zinc finger protein 540 - Homo sapiens (Human)	ZN540_HUMAN	N	0.615445	1	1	3.99672	3.11483	1	1	4.78274	0.399098	0.8876	3
522971	Q5EBM4	Zinc finger protein 542 - Homo sapiens (Human)	ZN542_HUMAN	N	0.615445	1	1	3.99672	3.11483	1	1	4.78274	0.399098	0.8876	3
522973	Q8N141	Zinc finger protein 545 - Homo sapiens (Human)	ZN545_HUMAN	N	0.615445	1	1	7.99345	6.22966	1	1	9.56549	0.399098	0.8876	3
522974	Q86UE3	Zinc finger protein 546 - Homo sapiens (Human)	ZN546_HUMAN	N	0.615445	1	1	3.99672	3.11483	1	1	4.78274	0.399098	0.8876	3
522980	P15621	Zinc finger protein 44 (Zinc finger protein KOX7) (Gonadotropin-inducible transcription repressor 2) (GIOT-2) - Homo sapiens (Human)	ZNF44_HUMAN	N	0.615445	1	1	3.99672	3.11483	1	1	4.78274	0.399098	0.8876	3
522999	Q8NEP9	Zinc finger protein 555 - Homo sapiens (Human)	ZN555_HUMAN	N	0.615445	1	1	3.99672	3.11483	1	1	4.78274	0.399098	0.8876	3
523019	Q8N587	Zinc finger protein 561 - Homo sapiens (Human)	ZN561_HUMAN	N	0.615445	1	1	3.99672	3.11483	1	1	4.78274	0.399098	0.8876	3
523021	Q8TA94	Zinc finger protein 563 - Homo sapiens (Human)	ZN563_HUMAN	N	0.615445	1	1	3.99672	3.11483	1	1	4.78274	0.399098	0.8876	3
523023	Q8N9K5	Zinc finger protein 565 - Homo sapiens (Human)	ZN565_HUMAN	N	0.615445	1	1	3.99672	3.11483	1	1	4.78274	0.399098	0.8876	3
523024	Q969W8	Zinc finger protein 566 - Homo sapiens (Human)	ZN566_HUMAN	N	0.615445	1	1	3.99672	3.11483	1	1	4.78274	0.399098	0.8876	3
523027	Q96NI8	Zinc finger protein 570 - Homo sapiens (Human)	ZN570_HUMAN	N	0.615445	1	1	3.99672	3.11483	1	1	4.78274	0.399098	0.8876	3
523045	Q7Z3V5	Zinc finger protein 571 - Homo sapiens (Human)	ZN571_HUMAN	N	0.615445	1	1	3.99672	3.11483	1	1	4.78274	0.399098	0.8876	3
523053	Q96NG8	Zinc finger protein 582 - Homo sapiens (Human)	ZN582_HUMAN	N	0.615445	1	1	3.99672	3.11483	1	1	4.78274	0.399098	0.8876	3
523054	Q96ND8	Zinc finger protein 583 (Zinc finger protein L3-5) - Homo sapiens (Human)	ZN583_HUMAN	N	0.615445	1	1	3.99672	3.11483	1	1	4.78274	0.399098	0.8876	3
523060	Q96LW9	Zinc finger protein 323 - Homo sapiens (Human)	ZN323_HUMAN	N	0.615445	1	1	3.99672	3.11483	1	1	4.78274	0.399098	0.8876	3
523064	Q9NQX6	Zinc finger protein 331 (Zinc finger protein 463) (C2H2-like zinc finger protein rearranged in thyroid adenomas) - Homo sapiens (Human)	ZN331_HUMAN	N	0.615445	1	1	3.99672	3.11483	1	1	4.78274	0.399098	0.8876	3
523098	Q14585	Zinc finger protein 345 (Zinc finger protein HZF10) - Homo sapiens (Human)	ZN345_HUMAN	N	0.615445	1	1	3.99672	3.11483	1	1	4.78274	0.399098	0.8876	3
523106	Q8NA42	Zinc finger protein 383 - Homo sapiens (Human)	ZN383_HUMAN	N	0.615445	1	1	3.99672	3.11483	1	1	4.78274	0.399098	0.8876	3
523111	Q8N2I2	Zinc finger protein 619 - Homo sapiens (Human)	ZN619_HUMAN	N	0.615445	1	1	3.99672	3.11483	1	1	4.78274	0.399098	0.8876	3
523112	Q6ZNG0	Zinc finger protein 620 - Homo sapiens (Human)	ZN620_HUMAN	N	0.615445	1	1	3.99672	3.11483	1	1	4.78274	0.399098	0.8876	3
523113	Q6ZSS3	Zinc finger protein 621 - Homo sapiens (Human)	ZN621_HUMAN	N	0.615445	1	1	3.99672	3.11483	1	1	4.78274	0.399098	0.8876	3
523125	P58317	Zinc finger protein 121 (Zinc finger protein 20) (Fragment) - Homo sapiens (Human)	ZN121_HUMAN	N	0.615445	1	1	3.99672	3.11483	1	1	4.78274	0.399098	0.8876	3
523151	Q9UJL9	Zinc finger protein 643 - Homo sapiens (Human)	ZN643_HUMAN	N	0.615445	1	1	3.99672	3.11483	1	1	4.78274	0.399098	0.8876	3
523198	Q8TAQ5	Zinc finger protein 420 - Homo sapiens (Human)	ZN420_HUMAN	N	0.615445	1	1	3.99672	3.11483	1	1	4.78274	0.399098	0.8876	3
523200	Q9BUY5	Zinc finger protein 426 - Homo sapiens (Human)	ZN426_HUMAN	N	0.615445	1	1	3.99672	3.11483	1	1	4.78274	0.399098	0.8876	3
523209	Q96BR6	Zinc finger protein 669 - Homo sapiens (Human)	ZN669_HUMAN	N	0.615445	1	1	3.99672	3.11483	1	1	4.78274	0.399098	0.8876	3
523230	Q8NDP4	Zinc finger protein 439 - Homo sapiens (Human)	ZN439_HUMAN	N	0.615445	1	1	3.99672	3.11483	1	1	4.78274	0.399098	0.8876	3
523258	Q9H7R0	Zinc finger protein 442 - Homo sapiens (Human)	ZN442_HUMAN	N	0.615445	1	1	3.99672	3.11483	1	1	4.78274	0.399098	0.8876	3
523286	Q8TAF7	Zinc finger protein 461 (Gonadotropin-inducible transcription repressor 1) (GIOT-1) - Homo sapiens (Human)	ZN461_HUMAN	N	0.615445	1	1	7.99345	6.22966	1	1	9.56549	0.399098	0.8876	3
523291	Q32M78	Zinc finger protein 699 (Hangover homolog) - Homo sapiens (Human)	ZN699_HUMAN	N	0.615445	1	1	3.99672	3.11483	1	1	4.78274	0.399098	0.8876	3
523292	Q9H0M5	Zinc finger protein 700 - Homo sapiens (Human)	ZN700_HUMAN	N	0.615445	1	1	3.99672	3.11483	1	1	4.78274	0.399098	0.8876	3
523310	Q9BX82	Zinc finger protein 471 (EZFIT-related protein 1) - Homo sapiens (Human)	ZN471_HUMAN	N	0.615445	1	1	3.99672	3.11483	1	1	4.78274	0.399098	0.8876	3
523312	Q8N972	Zinc finger protein 709 - Homo sapiens (Human)	ZN709_HUMAN	N	0.615445	1	1	3.99672	3.11483	1	1	4.78274	0.399098	0.8876	3
523334	Q9ULM2	Zinc finger protein 490 - Homo sapiens (Human)	ZN490_HUMAN	N	0.615445	1	1	3.99672	3.11483	1	1	4.78274	0.399098	0.8876	3
522677	Q01831	DNA-repair protein complementing XP-C cells (Xeroderma pigmentosum group C-complementing protein) (p125) - Homo sapiens (Human)	XPC_HUMAN	N	0.615525	0.217355	1	7.99345	1	0.19534	1	1	3.66939	3.51679	3
511376	O60888	Protein CutA precursor (Brain acetylcholinesterase putative membrane anchor) (Acetylcholinesterase-associated protein) - Homo sapiens (Human)	CUTA_HUMAN	Y	0.617216	0.701493	0.107373	0.36077	2.00172	3.67432	1.59944	0.906555	3.22141	1.36136	3
517900	Q9Y2J8	Protein-arginine deiminase type-2 (EC 3.5.3.15) (Protein-arginine deiminase type II) (Peptidylarginine deiminase II) (PAD-H19) - Homo sapiens (Human)	PADI2_HUMAN	N	0.619436	1.21272	1	10.478	2.72237	1	1	0.2057	1	3.65676	3
514541	Q00978	Transcriptional regulator ISGF3 subunit gamma (Interferon regulatory factor 9) (IRF-9) (IFN-alpha-responsive transcription factor subunit) (Interferon-stimulated gene factor 3 gamma) (ISGF3 p48 subunit) (ISGF-3 gamma) - Homo sapiens (Hu	IRTF_HUMAN	N	0.620382	0.611531	1	1.16241	0.250295	1	3.17486	4.10105	1	3.65676	3
510193	Q8WVQ1	Soluble calcium-activated nucleotidase 1 (EC 3.6.1.6) (SCAN-1) (Apyrase homolog) (Putative NF-kappa-B-activating protein 107) (Putative MAPK-activating protein PM09) - Homo sapiens (Human)	CANT1_HUMAN	N	0.623427	2.02021	0.08053	1	0.907458	1	1	4.10105	0.134758	3.51679	3
517924	Q8IXQ6	Poly [ADP-ribose] polymerase 9 (EC 2.4.2.30) (PARP-9) (B aggressive lymphoma protein) - Homo sapiens (Human)	PARP9_HUMAN	N	0.625731	1.04611	4.89129	1.18613	0.833065	2.69298	3.06628	1.32773	0.358189	0.474828	3
521169	Q86W42	THO complex subunit 6 homolog (WD repeat protein 58) - Homo sapiens (Human)	THOC6_HUMAN	N	0.626109	5.80175	1.05039	4.64323	1.08056	4.38395	1.48824	1.69775	0.217528	0.442239	3
513941	P13762	HLA class II histocompatibility antigen, DR-W53 beta chain precursor - Homo sapiens (Human)	HB2K_HUMAN	N	0.626214	1	8.24118	1.0674	0.711967	0.70433	2.197	4.10105	1	1	3
519237	Q9BZE1	39S ribosomal protein L37, mitochondrial precursor (L37mt) (MRP-L37) - Homo sapiens (Human)	RM37_HUMAN	N	0.626429	0.476043	0.32212	0.247079	0.529818	4.24106	1.72843	2.38866	1	2.581	3
509422	Q96KQ4	Apoptosis-stimulating of p53 protein 1 (Protein phosphatase 1 regulatory subunit 13B) - Homo sapiens (Human)	ASPP1_HUMAN	N	0.627084	4.79812	1	0.214765	1	1	3.32204	1.39285	3.66939	0.25055	3
512147	O60673	DNA polymerase zeta catalytic subunit (EC 2.7.7.7) (hREV3) - Homo sapiens (Human)	DPOLZ_HUMAN	N	0.627463	0.149139	1	3.99672	0.265425	1	1	1	8.3986	3.79672	3
519240	Q8N983	39S ribosomal protein L43, mitochondrial precursor (L43mt) (MRP-L43) (Mitochondrial ribosomal protein bMRP36a) - Homo sapiens (Human)	RM43_HUMAN	N	0.629579	0.369076	0.0988372	1	0.250295	4.24106	3.17486	8.2021	1	0.654895	3
513922	P05537	HLA class II histocompatibility antigen, DQ(W3) beta chain precursor - Homo sapiens (Human)	HB23_HUMAN	Y	0.630261	1	5.40817	0.895088	0.894533	0.85636	6.05538	1	1	2.27297	3
509119	O95782	AP-2 complex subunit alpha-1 (Adapter-related protein complex 2 alpha-1 subunit) (Alpha-adaptin A) (Adaptor protein complex AP-2 alpha-1 subunit) (Clathrin assembly protein complex 2 alpha-A large chain) (100 kDa coated vesicle protein	AP2A1_HUMAN	N	0.630423	1.0966	5.92505	1.35447	1.15197	3.2851	4.28462	1.34903	0.480982	1.05244	3
518203	P48059	Protein PINCH (Particularly interesting new Cys-His protein) (LIM and senescent cell antigen-like domains 1) (NY-REN-48 antigen) - Homo sapiens (Human)	PINC_HUMAN	N	0.634677	8.20081	0.525194	2.13475	2.02387	0.506831	0.856456	1.34405	0.855831	0.916201	3
516032	Q8IWA4	Transmembrane GTPase MFN1 (EC 3.6.5.-) (Mitofusin-1) (Fzo homolog) - Homo sapiens (Human)	MFN1_HUMAN	N	0.636578	0.286022	0.274675	1	3.37019	1	3.32204	4.10105	0.743612	1	3
518202	Q9Y237	Peptidyl-prolyl cis-trans isomerase NIMA-interacting 4 (EC 5.2.1.8) (Rotamase Pin4) (PPIase Pin4) (Parvulin 14) (Par14) (Peptidyl-prolyl cis/trans isomerase EPVH) (hPar14) - Homo sapiens (Human)	PIN4_HUMAN	N	0.640567	0.891244	0.154393	5.28975	5.18297	1	1.19024	0.196692	1	7.03359	3
516841	Q9UGV2	Protein NDRG3 - Homo sapiens (Human)	NDRG3_HUMAN	N	0.64078	1.47918	0.104369	2.48913	13.4808	10.6741	0.41213	0.806642	0.544367	0.497063	3
521660	P11388	DNA topoisomerase 2-alpha (EC 5.99.1.3) (DNA topoisomerase II, alpha isozyme) - Homo sapiens (Human)	TOP2A_HUMAN	N	0.648427	0.682981	0.0858663	9.93298	1.27402	4.38395	3.09275	0.916201	1.70113	0.996232	3
513176	Q8TAE8	Growth arrest and DNA-damage-inducible proteins-interacting protein 1 (CR6-interacting factor 1) (CRIF1) (CKII beta-associating protein) (Papillomavirus L2-interacting nuclear protein 1) (PLINP-1) - Homo sapiens (Human)	G45IP_HUMAN	N	0.651462	6.49946	0.142588	5.28975	1.92462	0.146	0.177104	1	1	4.17623	3
509542	P55957	BH3-interacting domain death agonist (BID) (p22 BID) [Contains: BH3-interacting domain death agonist p15 (p15 BID); BH3-interacting domain death agonist p13 (p13 BID); BH3-interacting domain death agonist p11 (p11 BID)] - Homo sapiens (H	BID_HUMAN	N	0.652792	0.784251	0.296512	2.30509	3.00037	17.3929	0.484582	1.27701	0.740899	0.854879	3
510908	Q14011	Cold-inducible RNA-binding protein (Glycine-rich RNA-binding protein CIRP) (A18 hnRNP) - Homo sapiens (Human)	CIRBP_HUMAN	N	0.653247	3.71663	0.0819263	1.641	4.01964	1.8195	0.237051	6.49242	1.99651	0.557821	3
516806	Q9UMX5	Neudesin precursor (Neuron-derived neurotrophic factor) (Secreted protein of unknown function) (SPUF protein) - Homo sapiens (Human)	NENF_HUMAN	N	0.654923	3.40269	1.21838	1.30261	0.275584	0.20277	4.68871	1.29359	2.1251	1.18166	3
509050	P02647	Apolipoprotein A-I precursor (Apo-AI) (ApoA-I) [Contains: Apolipoprotein A-I(1-242)] - Homo sapiens (Human)	APOA1_HUMAN	N	0.6555	10.4678	3.48196	1.04288	1.16029	0.600017	0.382573	0.498746	0.13576	2.45665	3
513923	P01920	HLA class II histocompatibility antigen, DQ(3) beta chain precursor (Clone II-102) - Homo sapiens (Human)	HB24_HUMAN	Y	0.655511	1	5.40817	1.03833	0.894533	0.85636	6.05538	1	1	2.27297	3
521382	Q9NPJ3	Thioesterase superfamily member 2 - Homo sapiens (Human)	THEM2_HUMAN	N	0.656793	2.19913	0.720174	0.66997	0.494095	0.672992	1.92889	2.68893	7.86869	1.19045	3
518194	Q99471	Prefoldin subunit 5 (C-myc-binding protein Mm-1) (Myc modulator 1) - Homo sapiens (Human)	PFD5_HUMAN	N	0.660309	1.23795	0.0856908	1	6.22966	1	2.7897	3.26937	1	0.25055	3
518471	P07738	Bisphosphoglycerate mutase (EC 5.4.2.4) (2,3-bisphosphoglycerate mutase, erythrocyte) (2,3-bisphosphoglycerate synthase) (BPGM) (EC 5.4.2.1) (EC 3.1.3.13) (BPG-dependent PGAM) - Homo sapiens (Human)	PMGE_HUMAN	N	0.661253	1	19.5652	0.101898	3.37019	0.0272217	1.38934	1	1	3.51679	3
508858	P51648	Fatty aldehyde dehydrogenase (EC 1.2.1.3) (Aldehyde dehydrogenase, microsomal) (Aldehyde dehydrogenase family 3 member A2) (Aldehyde dehydrogenase 10) - Homo sapiens (Human)	AL3A2_HUMAN	Y	0.66167	0.612551	4.10545	0.643171	1.73658	4.3125	7.86357	1.4714	1.99617	0.853212	3
514860	Q14573	Inositol 1,4,5-trisphosphate receptor type 3 (Type 3 inositol 1,4,5-trisphosphate receptor) (Type 3 InsP3 receptor) (IP3 receptor isoform 3) (InsP3R3) - Homo sapiens (Human)	ITPR3_HUMAN	Y	0.663712	3.40269	0.148256	1	0.624891	0.842405	0.516577	2.43587	1.18389	4.26887	3
513054	Q9H479	Fructosamine-3-kinase (EC 2.7.1.-) - Homo sapiens (Human)	FN3K_HUMAN	N	0.664544	0.521448	4.89129	1	6.22966	1	0.903528	0.296981	1	3.51679	3
513445	Q08378	Golgin subfamily A member 3 (Golgin-160) (Golgi complex-associated protein of 170 kDa) (GCP170) - Homo sapiens (Human)	GOGA3_HUMAN	N	0.665896	0.40424	0.564081	1.71671	0.907458	0.640056	3.02769	4.4419	1	14.0672	3
511332	P09669	Cytochrome c oxidase polypeptide VIc precursor (EC 1.9.3.1) - Homo sapiens (Human)	COX6C_HUMAN	Y	0.666123	0.217355	0.980823	1.19419	0.44511	1.17751	3.32204	4.77731	11.2731	0.337435	3
512106	Q96BY6	Dedicator of cytokinesis protein 10 (Protein zizimin 3) - Homo sapiens (Human)	DOC10_HUMAN	N	0.667694	1	4.89129	1	0.265425	4.24106	1	0.30297	0.08854	3.51679	3
513784	Q9BW72	HIG1 domain family member 2A - Homo sapiens (Human)	HIG2A_HUMAN	Y	0.669774	0.682172	0.154393	1.20782	0.534132	19.442	0.177104	2.64879	13.3728	1.21866	3
522370	Q9UN37	Vacuolar protein sorting-associating protein 4A (SKD2 protein) (hVPS4) (VPS4-1) - Homo sapiens (Human)	VPS4A_HUMAN	N	0.678164	2.08579	4.89129	0.533921	0.735141	2.51326	0.586577	1.13391	0.334075	0.560612	3
515662	P09917	Arachidonate 5-lipoxygenase (EC 1.13.11.34) (5-lipoxygenase) (5-LO) - Homo sapiens (Human)	LOX5_HUMAN	N	0.679752	0.2376	1	3.46263	1.54617	0.422598	3.02769	2.32927	1	1	3
511891	Q9UPY3	Endoribonuclease Dicer (EC 3.1.26.-) (Helicase with RNase motif) (Helicase-MOI) - Homo sapiens (Human)	DICER_HUMAN	N	0.681902	1	1.34352	5.28975	0.714447	4.38395	1	4.78274	0.161029	0.605236	3
522985	O43830	Zinc finger protein 73 (Zinc finger protein 186) (hZNF2) - Homo sapiens (Human)	ZNF73_HUMAN	N	0.683619	2.45559	0.32212	1	1.86816	6.43303	0.284668	0.30297	4.1993	1	3
508511	Q96IU4	Abhydrolase domain-containing protein 14B (CCG1-interacting factor B) - Homo sapiens (Human)	AB14B_HUMAN	N	0.683808	0.738153	1.60358	3.48722	2.37327	1.55767	0.823471	3.14606	1.35529	0.574189	3
508718	P78536	ADAM 17 precursor (EC 3.4.24.86) (A disintegrin and metalloproteinase domain 17) (TNF-alpha-converting enzyme) (TNF-alpha convertase) (Snake venom-like protease) (CD156b antigen) - Homo sapiens (Human)	ADA17_HUMAN	Y	0.686296	1	4.89129	0.214765	3.11483	1	0.223995	4.78274	1	1	3
520475	Q99523	Sortilin precursor (Neurotensin receptor 3) (NTR3) (NT3) (Glycoprotein 95) (Gp95) (100 kDa NT receptor) - Homo sapiens (Human)	SORT_HUMAN	Y	0.687166	0.772503	3.15117	7.99345	3.11483	1	1	0.586357	0.224381	0.706945	3
521655	P28289	Tropomodulin-1 (Erythrocyte tropomodulin) (E-Tmod) - Homo sapiens (Human)	TMOD1_HUMAN	N	0.687261	0.476043	26.0071	0.539015	1	0.603507	0.118996	0.0989938	12.068	7.59345	3
520730	Q9NZD8	Maspardin (Spastic paraplegia 21 autosomal recessive Mast syndrome protein) (Acid cluster protein 33) - Homo sapiens (Human)	SPG21_HUMAN	N	0.690394	1	1.57558	3.99672	1.36798	6.43303	0.223995	0.271248	1	7.03359	3
522359	Q9H7D7	WD repeat protein 26 - Homo sapiens (Human)	WDR26_HUMAN	N	0.690502	3.40269	0.107373	4.64323	0.962312	4.24106	1	0.296981	1	0.4438	3
518002	Q32P28	Prolyl 3-hydroxylase 1 precursor (EC 1.14.11.7) (Leucine- and proline-enriched proteoglycan 1) (Leprecan-1) (Growth suppressor 1) - Homo sapiens (Human)	P3H1_HUMAN	N	0.690867	1	0.32212	0.247079	3.11483	4.24106	17.5353	0.493021	0.17708	1	3
511011	Q9BRX8	Protein C10orf58 precursor - Homo sapiens (Human)	CJ058_HUMAN	Y	0.693331	0.614225	0.296512	0.286119	4.9276	4.3125	0.822516	0.202026	0.855831	3.04116	3
518477	Q15165	Serum paraoxonase/arylesterase 2 (EC 3.1.1.2) (EC 3.1.8.1) (PON 2) (Serum aryldialkylphosphatase 2) (A-esterase 2) (Aromatic esterase 2) - Homo sapiens (Human)	PON2_HUMAN	N	0.694646	0.439051	0.832717	0.426285	0.75728	0.29324	1.62801	2.23261	4.97376	2.22993	3
513811	P21266	Glutathione S-transferase Mu 3 (EC 2.5.1.18) (GSTM3-3) (GST class-mu 3) (hGSTM3-3) - Homo sapiens (Human)	GSTM3_HUMAN	N	0.694769	4.79812	2.26554	0.29084	0.897652	0.167104	1.59362	1	1.10919	3.51679	3
520772	Q9UNL2	Translocon-associated protein subunit gamma (TRAP-gamma) (Signal sequence receptor subunit gamma) (SSR-gamma) - Homo sapiens (Human)	SSRG_HUMAN	Y	0.694926	0.275699	1.98641	0.699254	3.37417	0.0651133	3.17486	1.2425	2.73563	0.916201	3
520132	Q9P0V9	Septin-10 - Homo sapiens (Human)	SEP10_HUMAN	N	0.695439	5.80175	1	1	0.826753	4.24106	3.02694	0.0996504	0.17708	0.770582	3
515854	Q86UE4	Protein LYRIC (Lysine-rich CEACAM1 co-isolated protein) (3D3/lyric) (Metastasis adhesion protein) (Metadherin) (Astrocyte elevated gene-1 protein) (AEG-1) - Homo sapiens (Human)	LYRIC_HUMAN	Y	0.696955	0.686984	0.568655	0.498068	1.72501	0.580466	2.01352	0.815577	2.0493	2.00067	3
512033	Q8WXX5	DnaJ homolog subfamily C member 9 (DnaJ protein SB73) - Homo sapiens (Human)	DNJC9_HUMAN	N	0.697131	0.621875	0.0559324	1.35044	1.80663	6.43303	0.531635	8.2021	2.14368	1.44615	3
523148	Q14966	Zinc finger protein 638 (Nuclear protein 220) (Zinc-finger matrin-like protein) (Cutaneous T-cell lymphoma-associated antigen se33-1) (CTCL tumor antigen se33-1) - Homo sapiens (Human)	ZN638_HUMAN	N	0.699448	0.227027	0.428995	1	0.57886	4.24106	2.80214	1.44903	1.19356	2.06628	3
519064	P04049	RAF proto-oncogene serine/threonine-protein kinase (EC 2.7.11.1) (Raf-1) (C-RAF) (cRaf) - Homo sapiens (Human)	RAF1_HUMAN	N	0.701522	1	1	0.29084	3.37019	4.24106	7.7164	1	0.134758	1	3
510748	Q9NWW5	Ceroid-lipofuscinosis neuronal protein 6 (Protein CLN6) - Homo sapiens (Human)	CLN6_HUMAN	Y	0.702562	0.217355	0.504422	0.101898	2.08187	12.9375	3.32204	1.60557	0.17708	1	3
520932	Q7L7X3	Serine/threonine-protein kinase TAO1 (EC 2.7.11.1) (Thousand and one amino acid protein 1) (STE20-like kinase PSK2) (Kinase from chicken homolog B) (hKFC-B) - Homo sapiens (Human)	TAOK1_HUMAN	N	0.70401	1	1.57558	3.99672	3.37019	0.19534	1	0.149973	1	7.03359	3
511268	Q08477	Cytochrome P450 4F3 (EC 1.14.13.30) (CYPIVF3) (Leukotriene-B(4) omega-hydroxylase) (Leukotriene-B(4) 20-monooxygenase) (Cytochrome P450-LTB-omega) - Homo sapiens (Human)	CP4F3_HUMAN	Y	0.704213	1	1	0.29084	0.257638	4.24106	0.292895	0.30297	3.66939	10.9703	3
510152	P08311	Cathepsin G precursor (EC 3.4.21.20) (CG) - Homo sapiens (Human)	CATG_HUMAN	N	0.704246	0.565819	42.7485	1.00881	0.476506	0.889546	14.395	0.632031	1	3.65676	3
514107	Q86VS8	Hook homolog 3 (hHK3) - Homo sapiens (Human)	HOOK3_HUMAN	N	0.704436	3.40269	1.57558	1	1.29727	4.38395	0.0976317	1	1	3.51679	3
518196	P49354	Protein farnesyltransferase/geranylgeranyltransferase type I alpha subunit (EC 2.5.1.58) (EC 2.5.1.59) (CAAX farnesyltransferase alpha subunit) (Ras proteins prenyltransferase alpha) (FTase-alpha) (Type I protein geranyl-geranyltransfer	PFTA_HUMAN	N	0.704536	1	0.230165	7.99345	0.421771	4.38395	0.74399	4.78274	1.1901	0.219115	3
522698	O43592	Exportin-T (tRNA exportin) (Exportin(tRNA)) - Homo sapiens (Human)	XPOT_HUMAN	N	0.706691	0.227027	2.21381	1	0.962312	4.24106	0.886795	4.4419	0.743612	0.219115	3
522920	Q96ME7	Zinc finger protein 512 - Homo sapiens (Human)	ZN512_HUMAN	N	0.708968	0.15363	0.315117	1	1	0.050897	7.7164	0.817342	12.068	9.56751	3
520581	Q02447	Transcription factor Sp3 (SPR-2) - Homo sapiens (Human)	SP3_HUMAN	N	0.711162	0.217355	0.32212	1	1	4.24106	3.17486	1	3.93434	0.881132	3
518123	P40855	Peroxisomal biogenesis factor 19 (Peroxin-19) (Peroxisomal farnesylated protein) (33 kDa housekeeping protein) - Homo sapiens (Human)	PEX19_HUMAN	N	0.713696	1.41408	0.230165	4.64323	4.9276	2.56908	0.981187	0.945378	0.913466	1.47022	3
508579	P33897	ATP-binding cassette sub-family D member 1 (Adrenoleukodystrophy protein) (ALDP) - Homo sapiens (Human)	ABCD1_HUMAN	N	0.713998	1	1.00441	0.918413	1.47016	2.92748	0.373885	5.0751	1	2.59736	3
513290	Q9Y3K8	Guanine nucleotide-binding protein G(I)/G(S)/G(O) gamma-5-like subunit - Homo sapiens (Human)	GBG5L_HUMAN	N	0.716298	0.772503	9.49819	4.64323	1.57773	4.3125	1	0.241505	0.093975	0.560612	3
516648	O43795	Myosin Ib (Myosin I alpha) (MMI-alpha) (MMIa) (MYH-1c) - Homo sapiens (Human)	MYO1B_HUMAN	N	0.719479	4.79812	1	1	11.668	1	0.219804	0.296981	4.1993	1	3
522718	Q96TA2	ATP-dependent metalloprotease YME1L1 (EC 3.4.24.-) (YME1-like protein 1) (ATP-dependent metalloprotease FtsH1) (Meg-4) (Presenilin-associated metalloprotease) (PAMP) - Homo sapiens (Human)	YMEL1_HUMAN	N	0.721835	1	1	0.247079	3.11483	1	3.17486	0.296981	3.66939	1	3
510026	P16070	CD44 antigen precursor (Phagocytic glycoprotein I) (PGP-1) (HUTCH-I) (Extracellular matrix receptor-III) (ECMR-III) (GP90 lymphocyte homing/adhesion receptor) (Hermes antigen) (Hyaluronate receptor) (Heparan sulfate proteoglycan) (Epica	CD44_HUMAN	Y	0.723141	1.31715	2.57101	1.09113	1.33808	6.55332	0.337936	4.27415	1	1.07483	3
511963	Q92506	Estradiol 17-beta-dehydrogenase 8 (EC 1.1.1.62) (17-beta-HSD 8) (17-beta-hydroxysteroid dehydrogenase 8) (Protein Ke6) (Ke-6) - Homo sapiens (Human)	DHB8_HUMAN	N	0.723353	0.423447	0.32212	0.626897	1	4.38395	6.34973	0.504844	11.2731	1.24248	3
512446	Q9UBC2	Epidermal growth factor receptor substrate 15-like 1 (Eps15-related protein) (Eps15R) - Homo sapiens (Human)	EP15R_HUMAN	N	0.723793	5.80175	0.107373	7.99345	3.37019	1	1.3733	0.565917	0.542145	0.4581	3
509177	P41227	N-terminal acetyltransferase complex ARD1 subunit homolog A (EC 2.3.1.88) (EC 2.3.1.-) - Homo sapiens (Human)	ARD1H_HUMAN	N	0.726362	0.80848	0.107373	3.99672	6.74038	1	2.3032	0.148491	0.517246	1	3
517799	Q53GL7	Poly [ADP-ribose] polymerase 10 (EC 2.4.2.30) (PARP-10) - Homo sapiens (Human)	PAR10_HUMAN	N	0.733559	0.369796	0.296512	5.28975	6.99574	1.56885	3.02769	0.264879	0.494481	0.881132	3
513837	Q9Y5Z4	Heme-binding protein 2 (Protein SOUL) (Placental protein 23) (PP23) - Homo sapiens (Human)	HEBP2_HUMAN	N	0.734524	2.54783	0.251316	1.45661	2.06816	2.11299	0.181792	0.368312	1.62644	0.859845	3
512508	Q08426	Peroxisomal bifunctional enzyme (PBE) (PBFE) [Includes: Enoyl-CoA hydratase (EC 4.2.1.17); 3,2-trans-enoyl-CoA isomerase (EC 5.3.3.8); 3-hydroxyacyl-CoA dehydrogenase (EC 1.1.1.35)] - Homo sapiens (Human)	ECHP_HUMAN	N	0.735458	0.324841	0.16106	1	3.62555	0.828449	1.00898	8.2021	3.66939	1.34219	3
513816	P01907	HLA class II histocompatibility antigen, DQ(5) alpha chain precursor (DC-1 alpha chain) - Homo sapiens (Human)	HA25_HUMAN	Y	0.735526	1	4.89129	0.287002	0.322894	4.38395	1	6.83327	1	0.822158	3
515933	Q14696	Mesoderm development candidate 2 (NY-REN-61 antigen) - Homo sapiens (Human)	MESD2_HUMAN	N	0.743389	1.14003	0.563164	1.15039	0.428163	0.85636	2.03392	4.08563	3.93434	0.209037	3
518657	Q15257	Serine/threonine-protein phosphatase 2A regulatory subunit B' (PP2A, subunit B', PR53 isoform) (Phosphotyrosyl phosphatase activator) (PTPA) - Homo sapiens (Human)	PTPA_HUMAN	N	0.745019	1.02632	0.593992	4.64323	2.11712	4.18411	0.751244	0.465472	0.922944	1.22645	3
513823	Q9NRV9	Heme-binding protein 1 (p22HBP) - Homo sapiens (Human)	HEBP1_HUMAN	N	0.745468	0.652224	11.3332	3.99672	1.29096	1.02621	1.18911	0.291225	3.66939	1.21047	3
512664	Q9UNN5	FAS-associated factor 1 (Protein FAF1) (hFAF1) - Homo sapiens (Human)	FAF1_HUMAN	N	0.749714	0.380011	0.787791	1	0.894533	0.09767	3.32204	4.10105	1.10919	2.53192	3
522470	O95497	Pantetheinase precursor (EC 3.5.1.92) (Pantetheine hydrolase) (Vascular non-inflammatory molecule 1) (Vanin-1) (Tiff66) - Homo sapiens (Human)	VNN1_HUMAN	N	0.760865	0.108677	21.6327	1	0.250295	0.85636	3.02769	1	0.0295133	11.3902	3
520764	Q9H254	Spectrin beta chain, brain 3 (Spectrin, non-erythroid beta chain 3) (Beta-IV spectrin) - Homo sapiens (Human)	SPTN4_HUMAN	N	0.762197	0.92405	2.56411	0.82052	2.16965	2.08508	0.238286	0.843183	0.8847	0.670824	3
516932	Q9Y6M9	NADH dehydrogenase [ubiquinone] 1 beta subcomplex subunit 9 (EC 1.6.5.3) (EC 1.6.99.3) (NADH-ubiquinone oxidoreductase B22 subunit) (Complex I-B22) (CI-B22) - Homo sapiens (Human)	NDUB9_HUMAN	N	0.762284	0.368568	0.673326	1.14725	0.295203	2.16191	0.732668	1.22244	11.0082	2.88302	3
508946	O43423	Acidic leucine-rich nuclear phosphoprotein 32 family member C (Phosphoprotein 32-related protein 1) (Tumorigenic protein pp32r1) - Homo sapiens (Human)	AN32C_HUMAN	N	0.763094	0.905514	0.315516	0.916039	2.65274	2.5282	0.604461	0.850196	2.01022	0.683903	3
511702	P49711	Transcriptional repressor CTCF (CCCTC-binding factor) (CTCFL paralog) (11-zinc finger protein) - Homo sapiens (Human)	CTCF_HUMAN	N	0.769564	0.149139	0.483441	4.63252	0.265425	0.19534	8.01075	1.2425	2.06898	0.296635	3
512242	Q14117	Dihydropyrimidinase (EC 3.5.2.2) (DHPase) (Hydantoinase) (DHP) - Homo sapiens (Human)	DPYS_HUMAN	N	0.769805	6.49946	1	0.620289	1	4.3125	1	0.0742454	2.81032	1	3
520156	Q9NVA2	Septin-11 - Homo sapiens (Human)	SEP11_HUMAN	N	0.770507	1.02177	0.993203	3.77575	2.67703	4.38395	1.50732	0.525408	0.64243	0.298302	3
515959	Q6UX53	Methyltransferase-like protein 7B precursor (EC 2.1.1.-) - Homo sapiens (Human)	MET7B_HUMAN	N	0.772007	0.0407827	1	1	3.62555	1	1	6.49242	1	2.40375	3
521317	P21980	Protein-glutamine gamma-glutamyltransferase 2 (EC 2.3.2.13) (Tissue transglutaminase) (TGase C) (TGC) (TG(C)) (Transglutaminase-2) (TGase-H) - Homo sapiens (Human)	TGM2_HUMAN	N	0.773221	3.31418	8.09579	1.31809	1.27595	0.383174	0.463833	1.30368	1	3.88371	3
518279	Q99570	Phosphoinositide 3-kinase regulatory subunit 4 (EC 2.7.11.1) (PI3-kinase regulatory subunit 4) (PI3-kinase p150 subunit) (Phosphoinositide 3-kinase adaptor protein) - Homo sapiens (Human)	PI3R4_HUMAN	N	0.774158	1.0429	1	1.71671	1.08056	4.38395	3.32204	4.10105	0.281925	0.125275	3
511147	Q8N684	Cleavage and polyadenylation specificity factor 7 (Cleavage and polyadenylation specificity factor 59 kDa subunit) (CPSF 59 kDa subunit) (Pre-mRNA cleavage factor Im 59 kDa subunit) - Homo sapiens (Human)	CPSF7_HUMAN	N	0.775193	1.04551	0.142588	2.70088	3.62555	4.24106	0.843309	1.05952	1	0.560612	3
514664	P09914	Interferon-induced protein with tetratricopeptide repeats 1 (IFIT-1) (Interferon-induced 56 kDa protein) (IFI-56K) - Homo sapiens (Human)	IFIT1_HUMAN	N	0.777106	0.369076	4.89129	1.06738	2.75927	1.3333	4.68871	0.790117	1	1.70976	3
511843	O00273	DNA fragmentation factor subunit alpha (DNA fragmentation factor 45 kDa subunit) (DFF-45) (Inhibitor of CAD) (ICAD) - Homo sapiens (Human)	DFFA_HUMAN	N	0.782171	0.974256	4.89129	1	6.22966	4.24106	1.78536	0.291225	0.854365	0.735748	3
511219	Q5HYK3	Ubiquinone biosynthesis methyltransferase COQ5, mitochondrial precursor (EC 2.1.1.-) - Homo sapiens (Human)	COQ5_HUMAN	N	0.784977	0.395041	0.525194	1	0.962312	4.38395	1	4.10105	7.33878	0.859845	3
514923	P08648	Integrin alpha-5 precursor (Fibronectin receptor subunit alpha) (Integrin alpha-F) (VLA-5) (CD49e antigen) [Contains: Integrin alpha-5 heavy chain; Integrin alpha-5 light chain] - Homo sapiens (Human)	ITA5_HUMAN	Y	0.787141	1	0.926861	0.290602	0.826753	12.7232	1	4.10105	1	3.51679	3
517898	Q9H2J4	Phosducin-like protein 3 (Viral IAP-associated factor 1) (VIAF-1) (HTPHLP) - Homo sapiens (Human)	PDCL3_HUMAN	N	0.788293	3.40269	0.32212	1	0.907458	4.3125	0.61346	0.885273	3.66939	1	3
510158	Q8IX12	Cell division cycle and apoptosis regulator protein 1 (Cell cycle and apoptosis regulatory protein 1) (CARP-1) (Death inducer with SAP domain) - Homo sapiens (Human)	CCAR1_HUMAN	N	0.788505	0.891277	0.355515	2.60899	0.532624	2.11299	2.23702	1.79318	0.442739	0.869014	3
519962	Q9UDX3	SEC14-like protein 4 (Tocopherol-associated protein 3) - Homo sapiens (Human)	S14L4_HUMAN	N	0.794623	3.40269	1.57558	0.29084	0.257638	4.24106	0.223995	4.78274	1	1	3
514189	O00303	Eukaryotic translation initiation factor 3 subunit 5 (eIF-3 epsilon) (eIF3 p47 subunit) (eIF3f) - Homo sapiens (Human)	IF35_HUMAN	N	0.798823	2.46865	0.15012	2.0047	0.817404	6.36688	0.895516	1.82326	0.368016	0.32774	3
508831	O00170	AH receptor-interacting protein (AIP) (Aryl-hydrocarbon receptor-interacting protein) (Immunophilin homolog ARA9) (HBV-X-associated protein 2) - Homo sapiens (Human)	AIP_HUMAN	N	0.799387	1.24273	0.395105	3.91397	3.48053	1.93189	2.03392	0.800356	0.818953	1.25114	3
510060	P55210	Caspase-7 precursor (EC 3.4.22.-) (CASP-7) (ICE-like apoptotic protease 3) (ICE-LAP3) (Apoptotic protease Mch-3) (CMH-1) [Contains: Caspase-7 subunit p20; Caspase-7 subunit p11] - Homo sapiens (Human)	CASP7_HUMAN	N	0.800264	3.40269	0.296512	1.93164	0.779626	6.50448	0.0711741	0.30297	2.21838	1	3
516441	Q96S97	Myeloid-associated differentiation marker (SB135) - Homo sapiens (Human)	MYADM_HUMAN	Y	0.801757	9.59624	0.16106	0.88091	3.62555	2.51326	0.940985	1	0.921337	0.822158	3
521244	Q6IPX3	Transcription elongation factor A protein-like 6 (TCEA-like protein 6) (Transcription elongation factor S-II protein-like 6) - Homo sapiens (Human)	TCAL6_HUMAN	N	0.805903	1.03387	0.0856908	0.539015	4.9276	8.62501	1.05025	1.2425	2.36777	1.12801	3
520939	P13984	Transcription initiation factor IIF subunit beta (EC 3.6.1.-) (ATP-dependent helicase GTF2F2) (TFIIF-beta) (Transcription initiation factor RAP30) - Homo sapiens (Human)	T2FB_HUMAN	N	0.806303	4.79812	1.90858	1	3.37019	1	0.223995	4.10105	0.334562	1	3
509637	Q99700	Ataxin-2 (Spinocerebellar ataxia type 2 protein) (Trinucleotide repeat-containing gene 13 protein) - Homo sapiens (Human)	ATX2_HUMAN	N	0.809464	1	0.0622727	1	0.894533	4.38395	0.973008	1	4.1993	3.79672	3
516589	Q8NHP6	Motile sperm domain-containing protein 2 - Homo sapiens (Human)	MSPD2_HUMAN	Y	0.810545	1	1	0.29084	0.645788	6.43303	3.02769	4.10105	0.281925	1	3
510494	Q9BRT2	Protein C6orf125 (Breast cancer-associated protein SGA-81M) - Homo sapiens (Human)	CF125_HUMAN	N	0.81082	0.629946	0.483441	1	3.62555	0.167104	0.346563	0.30297	11.0082	2.49381	3
521264	P23193	Transcription elongation factor A protein 1 (Transcription elongation factor S-II protein 1) (Transcription elongation factor TFIIS.o) - Homo sapiens (Human)	TCEA1_HUMAN	N	0.81082	2.41012	0.543872	1.53847	2.60845	6.43303	1.61714	0.116322	0.885528	0.704329	3
512751	P23610	Factor VIII intron 22 protein (CpG island protein) - Homo sapiens (Human)	F8I2_HUMAN	N	0.811885	0.2376	1	4.64323	0.265425	4.3125	3.32204	0.724514	1	1	3
518829	P49720	Proteasome subunit beta type 3 (EC 3.4.25.1) (Proteasome theta chain) (Proteasome chain 13) (Proteasome component C10-II) - Homo sapiens (Human)	PSB3_HUMAN	N	0.812247	0.702253	0.27879	2.03121	0.724533	2.85291	1.43524	0.400021	0.861818	4.49629	3
520952	Q01995	Transgelin (Smooth muscle protein 22-alpha) (SM22-alpha) (WS3-10) (22 kDa actin-binding protein) - Homo sapiens (Human)	TAGL_HUMAN	N	0.812395	0.346762	0.104369	2.32481	5.18297	1.33795	0.0769239	0.148491	7.62793	0.632021	3
514132	Q9NZL4	Hsp70-binding protein 1 (HspBP1) (Heat shock protein-binding protein 1) (Hsp70-interacting protein 1) (Hsp70-binding protein 2) (HspBP2) (Hsp70-interacting protein 2) - Homo sapiens (Human)	HPBP1_HUMAN	N	0.814974	9.59624	0.107373	1	17.3617	1	2.30576	1.39285	0.60094	0.857596	3
510659	Q02224	Centromeric protein E (CENP-E) - Homo sapiens (Human)	CENPE_HUMAN	N	0.815571	4.79812	4.89129	3.99672	1	1	1	0.291225	0.281925	0.219115	3
508777	Q9NRN7	L-aminoadipate-semialdehyde dehydrogenase-phosphopantetheinyl transferase (EC 2.7.8.-) (4'-phosphopantetheinyl transferase) (Alpha-aminoadipic semialdehyde dehydrogenase-phosphopantetheinyl transferase) (AASD-PPT) (LYS5 ortholog) - Hom	ADPPT_HUMAN	N	0.815724	3.40269	0.75518	0.214765	8.2978	4.24106	0.562282	1.29359	0.456733	0.8876	3
514089	P51553	Isocitrate dehydrogenase [NAD] subunit gamma, mitochondrial precursor (EC 1.1.1.41) (Isocitric dehydrogenase) (NAD(+)-specific ICDH) - Homo sapiens (Human)	IDH3G_HUMAN	N	0.817183	0.507475	0.589503	11.9902	0.47144	1.68481	0.657129	0.359771	6.03399	5.09655	3
513873	Q9UMS0	HIRA-interacting protein 5 - Homo sapiens (Human)	HIRP5_HUMAN	N	0.819477	0.739592	1	1	0.132712	4.24106	3.17486	1	3.66939	1	3
518387	Q9HAU0	Pleckstrin homology domain-containing family A member 5 (Phosphoinositol 3-phosphate-binding protein 2) (PEPP-2) - Homo sapiens (Human)	PKHA5_HUMAN	N	0.821836	0.2376	1	0.29084	3.62555	1	0.759738	1	4.1993	3.51679	3
508893	Q9Y673	Dolichyl-phosphate beta-glucosyltransferase (EC 2.4.1.117) (DolP-glucosyltransferase) - Homo sapiens (Human)	ALG5_HUMAN	Y	0.822531	0.2376	0.148256	3.99672	3.11483	1	1	1	3.66939	1.6025	3
515834	Q9H0V9	VIP36-like protein precursor (Lectin, mannose-binding 2-like) (LMAN2-like protein) - Homo sapiens (Human)	LMA2L_HUMAN	Y	0.823125	0.427832	0.0500822	1	0.648635	4.24106	1.89798	0.060594	3.10348	5.88599	3
512115	Q8TDB6	Protein deltex 3-like protein (B-lymphoma- and BAL-associated protein) (Rhysin-2) (Rhysin2) - Homo sapiens (Human)	DTX3L_HUMAN	N	0.82976	0.806697	3.68612	1.34762	1.11393	4.65416	2.06702	0.73121	0.165943	0.744314	3
520980	Q8NF91	Nesprin-1 (Nuclear envelope spectrin repeat protein 1) (Synaptic nuclear envelope protein 1) (Syne-1) (Myocyte nuclear envelope protein 1) (Myne-1) (Enaptin) - Homo sapiens (Human)	SYNE1_HUMAN	N	0.830233	1.43118	3.89159	0.709705	1.00721	0.0804865	0.54898	0.813948	7.33878	2.339	3
510348	Q9BYV8	Centrosomal protein of 41 kDa (Protein Cep41) (Testis-specific gene A14 protein) - Homo sapiens (Human)	CEP41_HUMAN	N	0.831844	3.40269	0.296512	1	3.11483	1	0.177104	1	2.36777	1	3
518145	Q9P1W9	Serine/threonine-protein kinase Pim-2 (EC 2.7.11.1) (Pim-2h) - Homo sapiens (Human)	PIM2_HUMAN	N	0.833176	1.22474	0.0653145	4.64323	2.60487	10.7455	0.490593	0.95463	0.550159	0.499694	3
518176	O60925	Prefoldin subunit 1 - Homo sapiens (Human)	PFD1_HUMAN	N	0.835648	1.26104	0.0915583	7.99345	7.25111	0.85636	4.68871	0.148491	1	1	3
511004	Q7Z3D6	UPF0317 protein C14orf159, mitochondrial precursor - Homo sapiens (Human)	CN159_HUMAN	N	0.835934	1	1.16595	7.99345	0.132712	0.210601	0.47829	0.348967	2.82144	2.48017	3
511210	Q8IVT2	Uncharacterized protein C19orf21 - Homo sapiens (Human)	CS021_HUMAN	N	0.839027	0.739592	1	1	0.265425	4.24106	2.38941	1	3.2055	0.0835167	3
518584	Q08209	Serine/threonine-protein phosphatase 2B catalytic subunit alpha isoform (EC 3.1.3.16) (Calmodulin-dependent calcineurin A subunit alpha isoform) (CAM-PRP catalytic subunit) - Homo sapiens (Human)	PP2BA_HUMAN	N	0.839746	0.452475	0.148256	11.2848	1.91598	12.8661	3.71961	0.945378	0.55861	1.21721	3
517392	Q9NWU1	3-oxoacyl-[acyl-carrier-protein] synthase, mitochondrial precursor (EC 2.3.1.41) (Beta-ketoacyl synthase) - Homo sapiens (Human)	OXSM_HUMAN	N	0.840274	0.507475	0.0877058	0.782905	3.62555	0.402376	3.22379	0.667653	2.43169	1.08736	3
513818	P05536	HLA class II histocompatibility antigen, DQ(W3) alpha chain precursor - Homo sapiens (Human)	HA27_HUMAN	Y	0.840538	1	4.89129	0.287002	0.540282	4.38395	1	6.83327	1	0.822158	3
516824	O75414	Nucleoside diphosphate kinase 6 (EC 2.7.4.6) (NDK 6) (NDP kinase 6) (nm23-H6) (Inhibitor of p53-induced apoptosis-alpha) (IPIA-alpha) - Homo sapiens (Human)	NDK6_HUMAN	N	0.840558	0.217355	1	0.29084	1	4.38395	3.02769	1.44903	3.66939	0.152452	3
511338	P46109	Crk-like protein - Homo sapiens (Human)	CRKL_HUMAN	N	0.842062	9.20444	0.355515	1.42638	1.30257	4.3125	0.331789	0.555601	0.53213	3.79672	3
521611	P49788	Retinoic acid receptor responder protein 1 (Tazarotene-induced gene 1 protein) (RAR-responsive protein TIG1) - Homo sapiens (Human)	TIG1_HUMAN	N	0.844695	1	1	0.717341	1	1	0.292895	4.4419	4.1993	2.08812	3
512542	Q9GZT9	Egl nine homolog 1 (EC 1.14.11.-) (Hypoxia-inducible factor prolyl hydroxylase 2) (HIF-prolyl hydroxylase 2) (HIF-PH2) (HPH-2) (Prolyl hydroxylase domain-containing protein 2) (PHD2) (SM-20) - Homo sapiens (Human)	EGLN1_HUMAN	N	0.845415	3.40269	0.16106	1	1	1	3.02769	4.78274	0.140963	1	3
519117	P11233	Ras-related protein Ral-A - Homo sapiens (Human)	RALA_HUMAN	N	0.845598	2.0299	0.787791	2.19142	0.277915	1.47072	0.390991	1.4461	17.5721	1.21721	3
509938	Q15059	Bromodomain-containing protein 3 (RING3-like protein) - Homo sapiens (Human)	BRD3_HUMAN	N	0.850724	1	4.89129	1	3.37019	4.24106	0.253853	1	0.369985	1	3
512328	Q13144	Translation initiation factor eIF-2B subunit epsilon (eIF-2B GDP-GTP exchange factor subunit epsilon) - Homo sapiens (Human)	EI2BE_HUMAN	N	0.851134	0.2376	0.274675	1	3.11483	1	3.17486	4.78274	0.743612	1	3
519490	Q9Y3B7	39S ribosomal protein L11, mitochondrial precursor (L11mt) (MRP-L11) - Homo sapiens (Human)	RM11_HUMAN	N	0.853292	0.434105	1.45032	3.99672	1.68708	0.414225	6.20255	1	7.33878	1.41698	3
514155	O43719	HIV Tat-specific factor 1 (Tat-SF1) - Homo sapiens (Human)	HTSF1_HUMAN	N	0.854017	0.786123	0.805736	1	3.47316	4.38395	2.03355	0.589357	0.382741	0.937757	3
511805	O43583	Density-regulated protein (DRP) (Protein DRP1) (Smooth muscle cell-associated protein 3) (SMAP-3) - Homo sapiens (Human)	DENR_HUMAN	N	0.858422	0.974256	0.483441	3.99672	6.99574	0.849382	1.72843	1.29359	2.06898	0.735074	3
514926	Q14684	Protein KIAA0179 - Homo sapiens (Human)	K0179_HUMAN	N	0.860629	1	3.15117	1	3.62555	1	0.504491	0.30297	0.554595	3.51679	3
508891	Q9H553	Alpha-1,3-mannosyltransferase ALG2 (EC 2.4.1.-) (GDP-Man:Man(1)GlcNAc(2)-PP-dolichol mannosyltransferase) - Homo sapiens (Human)	ALG2_HUMAN	N	0.863731	0.783321	1	0.858356	0.265425	4.38395	3.17486	6.49242	1	1	3
520604	P09132	Signal recognition particle 19 kDa protein (SRP19) - Homo sapiens (Human)	SRP19_HUMAN	N	0.869109	0.227027	0.154393	4.64323	0.826753	4.24106	12.8466	0.291225	1	0.233781	3
512625	P23141	Liver carboxylesterase 1 precursor (EC 3.1.1.1) (Acyl coenzyme A:cholesterol acyltransferase) (ACAT) (Monocyte/macrophage serine esterase) (HMSE) (Serine esterase 1) (Brain carboxylesterase hBr1) (Triacylglycerol hydrolase) (TGH) (Egasy	EST1_HUMAN	N	0.872885	15.0062	1.06799	1.68813	0.675926	1.68481	4.83588	5.07291	1	1	3
513672	P50148	Guanine nucleotide-binding protein G(q) subunit alpha (Guanine nucleotide-binding protein alpha-q) - Homo sapiens (Human)	GNAQ_HUMAN	N	0.872912	0.735043	4.89129	1.54702	0.577769	2.5282	0.813851	0.393313	1.55385	3.32526	3
518451	P48147	Prolyl endopeptidase (EC 3.4.21.26) (Post-proline cleaving enzyme) (PE) - Homo sapiens (Human)	PPCE_HUMAN	N	0.878597	0.80848	0.104369	3.99672	1.62346	4.21202	0.171326	0.690092	2.1251	1.72646	3
508828	Q16352	Alpha-internexin (Alpha-Inx) (66 kDa neurofilament protein) (Neurofilament-66) (NF-66) - Homo sapiens (Human)	AINX_HUMAN	N	0.878799	0.851703	2.33471	0.713483	0.869482	1.11839	1.58699	2.26635	0.945477	3.51986	3
519498	O43665	Regulator of G-protein signaling 10 (RGS10) - Homo sapiens (Human)	RGS10_HUMAN	N	0.879081	4.79812	1	1	4.9276	4.38395	0.73589	0.483009	0.406609	1.72612	3
519054	P98175	RNA-binding protein 10 (RNA-binding motif protein 10) - Homo sapiens (Human)	RBM10_HUMAN	N	0.879256	3.40269	0.107373	1	1.44347	4.38395	3.02769	1	0.456733	1.6025	3
519480	O75787	Renin receptor precursor (Renin/prorenin receptor) (ATPase H(+)-transporting lysosomal accessory protein 2) (ATPase H(+)-transporting lysosomal-interacting protein 2) (Vacuolar ATP synthase membrane sector-associated protein M8-9) (V-AT	RENR_HUMAN	Y	0.889309	0.739592	0.154393	3.99672	1	0.19534	6.34973	4.78274	1	0.822158	3
520605	P61011	Signal recognition particle 54 kDa protein (SRP54) - Homo sapiens (Human)	SRP54_HUMAN	N	0.889412	0.788371	0.181291	3.48722	1.30068	12.7232	5.5363	0.945378	0.281925	0.19731	3
519658	P10301	Ras-related protein R-Ras (p23) - Homo sapiens (Human)	RRAS_HUMAN	N	0.890573	1	4.89129	1	1.37569	0.291919	1	0.30297	5.76904	3.79672	3
521251	Q92734	Protein TFG (TRK-fused gene protein) - Homo sapiens (Human)	TFG_HUMAN	N	0.893397	1.08205	0.09578	0.518557	2.63776	0.423528	3.94579	2.46019	1.86976	1.03297	3
520923	O75683	Surfeit locus protein 6 - Homo sapiens (Human)	SURF6_HUMAN	N	0.893466	1	4.89129	3.99672	1	1	0.146448	1	0.140963	3.51679	3
512547	Q9Y3B2	3'-5' exoribonuclease CSL4 homolog (EC 3.1.13.-) (Exosome component 1) - Homo sapiens (Human)	EXOS1_HUMAN	N	0.894787	3.40269	1	1	0.962312	0.85636	3.17486	0.148491	0.450555	7.17355	3
510412	Q9HBL7	Protein C9orf46 - Homo sapiens (Human)	CI046_HUMAN	Y	0.895119	0.217355	1	3.99672	3.62555	0.167104	1	1	4.1993	1	3
510786	O75175	CCR4-NOT transcription complex subunit 3 (CCR4-associated factor 3) (Leukocyte receptor cluster member 2) - Homo sapiens (Human)	CNOT3_HUMAN	N	0.896096	1	0.16106	1	3.11483	1	3.02769	4.78274	0.281925	1	3
509080	Q9BQE5	Apolipoprotein-L2 (Apolipoprotein L-II) (ApoL-II) - Homo sapiens (Human)	APOL2_HUMAN	Y	0.896746	0.508081	4.89129	4.64323	1.16151	8.62501	1.46054	0.497505	1.18389	0.152452	3
513900	O14929	Histone acetyltransferase type B catalytic subunit (EC 2.3.1.48) - Homo sapiens (Human)	HAT1_HUMAN	N	0.897833	2.31751	0.601556	2.62851	1.54882	12.9375	0.729446	0.552624	0.70123	0.706945	3
514520	P20839	Inosine-5'-monophosphate dehydrogenase 1 (EC 1.1.1.205) (IMP dehydrogenase 1) (IMPDH-I) (IMPD 1) - Homo sapiens (Human)	IMDH1_HUMAN	N	0.903032	0.626441	0.470961	0.880395	2.15296	4.3125	0.63118	2.02935	0.427915	0.219115	3
510326	Q9UQ88	PITSLRE serine/threonine-protein kinase CDC2L2 (EC 2.7.11.22) (Galactosyltransferase-associated protein kinase p58/GTA) (Cell division cycle 2-like protein kinase 2) (CDK11) - Homo sapiens (Human)	CD2L2_HUMAN	N	0.903165	4.10041	1	7.99345	0.481156	4.24106	1.3733	0.291225	0.235749	0.881132	3
521663	Q9Y5J9	Mitochondrial import inner membrane translocase subunit Tim8 B (Deafness dystonia protein 2) (DDP-like protein) - Homo sapiens (Human)	TIM8B_HUMAN	N	0.905252	0.513161	1	1	3.62555	1	3.17486	1.19433	3.93434	0.233781	3
518417	Q16822	Phosphoenolpyruvate carboxykinase [GTP], mitochondrial precursor (EC 4.1.1.32) (Phosphoenolpyruvate carboxylase) (PEPCK-M) - Homo sapiens (Human)	PPCKM_HUMAN	N	0.906157	0.570904	1.98709	0.931537	0.571479	0.910802	0.24804	4.10105	2.63509	2.30939	3
509261	Q9HD20	Probable cation-transporting ATPase 13A1 (EC 3.6.3.-) - Homo sapiens (Human)	AT131_HUMAN	Y	0.90671	0.525029	0.885378	0.789474	0.683255	2.7413	2.78026	3.93041	1.95976	1.02651	3
518332	O75928	Protein inhibitor of activated STAT2 (Protein inhibitor of activated STAT x) (Msx-interacting zinc finger protein) (Miz1) (DAB2-interacting protein) (DIP) (Androgen receptor-interacting protein 3) (ARIP3) (PIAS-NY protein) - Homo sapie	PIAS2_HUMAN	N	0.909069	3.40269	0.32212	1	1	1	1	4.10105	0.30533	5.55512	3
519032	Q96D15	Reticulocalbin-3 precursor (EF-hand calcium-binding protein RLP49) - Homo sapiens (Human)	RCN3_HUMAN	N	0.911219	1	4.89129	0.13359	1	0.256553	14.3605	1	1	3.51679	3
508765	P11766	Alcohol dehydrogenase class 3 chi chain (EC 1.1.1.1) (Alcohol dehydrogenase class III chi chain) (S-(hydroxymethyl)glutathione dehydrogenase) (EC 1.1.1.284) (Glutathione-dependent formaldehyde dehydrogenase) (FDH) - Homo sapiens (Human)	ADHX_HUMAN	N	0.911318	0.644243	0.673563	0.675219	2.40749	2.16191	2.83748	0.405979	0.602141	0.917705	3
521662	O60220	Mitochondrial import inner membrane translocase subunit Tim8 A (Deafness dystonia protein 1) (X-linked deafness dystonia protein) - Homo sapiens (Human)	TIM8A_HUMAN	N	0.916823	1.33587	0.0653145	0.402608	3.62555	4.3125	1.05025	0.574973	9.70338	0.671822	3
521376	P05452	Tetranectin precursor (TN) (C-type lectin domain family 3 member B) (Plasminogen kringle 4-binding protein) - Homo sapiens (Human)	TETN_HUMAN	N	0.916834	0.217355	2.15725	1.53847	0.250295	0.19534	1.08321	4.78274	4.1993	0.854879	3
522675	O76024	Wolframin - Homo sapiens (Human)	WFS1_HUMAN	Y	0.924932	0.465451	0.274675	5.28975	1	1	4.68871	0.291225	3.66939	0.822158	3
518597	P16298	Serine/threonine-protein phosphatase 2B catalytic subunit beta isoform (EC 3.1.3.16) (Calmodulin-dependent calcineurin A subunit beta isoform) (CAM-PRP catalytic subunit) - Homo sapiens (Human)	PP2BB_HUMAN	N	0.92533	0.80848	0.32212	3.99672	0.562361	6.43303	9.96612	0.945378	0.683906	0.219115	3
514987	Q13555	Calcium/calmodulin-dependent protein kinase type II gamma chain (EC 2.7.11.17) (CaM-kinase II gamma chain) (CaM kinase II gamma subunit) (CaMK-II subunit gamma) - Homo sapiens (Human)	KCC2G_HUMAN	N	0.928195	0.514758	0.891456	1.59024	1.10307	0.09767	2.05995	0.806642	3.93434	2.6434	3
515036	P33176	Kinesin heavy chain (Ubiquitous kinesin heavy chain) (UKHC) - Homo sapiens (Human)	KINH_HUMAN	N	0.92961	1.12599	0.254736	3.46722	3.39839	2.26037	0.798898	0.627847	0.451341	1.15084	3
512094	O00115	Deoxyribonuclease-2-alpha precursor (EC 3.1.22.1) (Deoxyribonuclease II alpha) (DNase II alpha) (Acid DNase) (Lysosomal DNase II) (R31240_2) - Homo sapiens (Human)	DNS2A_HUMAN	N	0.929767	0.739592	1	0.182037	2.37327	6.13138	0.0478963	2.69152	0.292197	0.770582	3
522494	Q9Y5K8	Vacuolar ATP synthase subunit D (EC 3.6.3.14) (V-ATPase D subunit) (Vacuolar proton pump D subunit) (V-ATPase 28 kDa accessory protein) - Homo sapiens (Human)	VATD_HUMAN	N	0.931206	3.40269	0.142588	0.14542	0.538406	16.9642	1	1.2425	0.696694	3.51679	3
513436	Q9Y5B6	GC-rich sequence DNA-binding factor homolog - Homo sapiens (Human)	GCFC_HUMAN	N	0.935183	1	1	0.29084	3.11483	4.38395	0.886795	4.78274	0.134758	0.951269	3
513809	P09488	Glutathione S-transferase Mu 1 (EC 2.5.1.18) (GSTM1-1) (GST class-mu 1) (GSTM1a-1a) (GSTM1b-1b) (HB subunit 4) (GTH4) - Homo sapiens (Human)	GSTM1_HUMAN	N	0.93561	1	1	3.28208	1	1.64251	3.02769	0.202535	1.09774	7.03359	3
510273	Q9Y2S6	Coiled-coil domain-containing protein 72 - Homo sapiens (Human)	CCD72_HUMAN	N	0.937292	0.217355	0.137338	0.107383	6.22966	4.38395	1	1	3.65386	1	3
513971	Q9Y450	HBS1-like protein (ERFS) - Homo sapiens (Human)	HBS1L_HUMAN	N	0.937318	1	0.32212	3.99672	6.22966	1	0.768587	0.30297	0.17708	3.51679	3
511446	Q9BVG4	UPF0368 protein Cxorf26 - Homo sapiens (Human)	CX026_HUMAN	N	0.939302	2.31751	0.154393	1.16241	1.37569	4.24106	2.01007	0.485256	0.217528	0.25055	3
520434	P18583	SON protein (SON3) (Negative regulatory element-binding protein) (NRE-binding protein) (DBP-5) (Bax antagonist selected in saccharomyces 1) (BASS1) - Homo sapiens (Human)	SON_HUMAN	N	0.940629	0.706346	0.427448	0.946273	1.52788	4.24106	2.71058	2.55401	0.365743	1.43878	3
519050	Q9H2M9	Rab3 GTPase-activating protein non-catalytic subunit (Rab3 GTPase-activating protein 150 kDa subunit) (Rab3-GAP p150) (Rab3-GAP regulatory subunit) (RAB3-GAP150) (RGAP-iso) - Homo sapiens (Human)	RBGPR_HUMAN	N	0.948506	3.40269	0.32212	3.99672	0.687845	8.55357	1	0.291225	0.344831	1.14354	3
521156	Q9Y2W6	Tudor and KH domain-containing protein - Homo sapiens (Human)	TDRKH_HUMAN	Y	0.949979	1	0.0962856	6.6416	0.826753	4.38395	0.391793	0.717282	2.21838	1.60843	3
512379	P09104	Gamma-enolase (EC 4.2.1.11) (2-phospho-D-glycerate hydro-lyase) (Neural enolase) (Neuron-specific enolase) (NSE) (Enolase 2) - Homo sapiens (Human)	ENOG_HUMAN	N	0.950325	2.09807	0.343807	0.694814	3.47952	2.07306	1.04385	0.322798	0.42413	0.85731	3
519881	P02743	Serum amyloid P-component precursor (SAP) (9.5S alpha-1-glycoprotein) [Contains: Serum amyloid P-component(1-203)] - Homo sapiens (Human)	SAMP_HUMAN	N	0.951062	1	4.00896	2.17292	0.371062	0.454478	0.357552	1.69318	1	2.7486	3
521744	Q9NNW7	Thioredoxin reductase 2, mitochondrial precursor (EC 1.8.1.9) (TR3) (TR-beta) (Selenoprotein Z) (SelZ) - Homo sapiens (Human)	TRXR2_HUMAN	N	0.954198	0.727718	0.416598	1.02701	0.846217	2.11332	1.22904	0.868193	2.1137	2.05139	3
509181	P30533	Alpha-2-macroglobulin receptor-associated protein precursor (Alpha-2-MRAP) (Low density lipoprotein receptor-related protein-associated protein 1) (RAP) - Homo sapiens (Human)	AMRP_HUMAN	Y	0.958356	1.35742	0.584973	0.317866	0.885107	2.09903	9.32445	0.554859	8.3986	0.884478	3
516386	Q8N4Q1	Mitochondrial intermembrane space import and assembly protein 40 (Coiled-coil-helix-coiled-coil-helix domain-containing protein 4) - Homo sapiens (Human)	MIA40_HUMAN	N	0.961551	1	1.34352	1.16241	3.11483	4.24106	2.83281	0.0846129	0.281925	0.822158	3
514643	O43432	Eukaryotic translation initiation factor 4 gamma 3 (eIF-4-gamma 3) (eIF-4G 3) (eIF4G 3) (eIF-4-gamma II) (eIF4GII) - Homo sapiens (Human)	IF4G3_HUMAN	N	0.961602	0.994221	0.0962856	2.32481	16.851	4.24106	1.36765	0.226575	1.21264	0.58512	3
513812	Q03013	Glutathione S-transferase Mu 4 (EC 2.5.1.18) (GSTM4-4) (GST class-mu 4) (GTS-Mu2) - Homo sapiens (Human)	GSTM4_HUMAN	N	0.962383	1	1	3.28208	1	1.01367	3.02769	0.22499	1.1504	7.03359	3
508931	Q8NAG6	Ankyrin repeat domain-containing protein 41 - Homo sapiens (Human)	ANR41_HUMAN	N	0.965523	0.340681	0.711031	3.99672	0.516914	0.85636	1.25078	0.296981	3.66939	5.02157	3
511777	Q00796	Sorbitol dehydrogenase (EC 1.1.1.14) (L-iditol 2-dehydrogenase) - Homo sapiens (Human)	DHSO_HUMAN	N	0.969644	2.01243	0.192571	0.518125	1.58616	7.58459	0.508853	0.171646	0.840003	3.22424	3
515235	O00139	Kinesin-like protein KIF2A (Kinesin-2) (HK2) - Homo sapiens (Human)	KIF2A_HUMAN	N	0.973926	1	0.137338	7.99345	1	6.50448	1.41641	4.78274	0.659166	0.437256	3
517003	Q8NFH4	Nucleoporin Nup37 (p37) - Homo sapiens (Human)	NUP37_HUMAN	N	0.974393	8.20081	1	2.13475	0.125147	0.167104	6.05538	1.10017	1.0685	0.569919	3
512053	O00429	Dynamin-1-like protein (EC 3.6.5.5) (Dynamin-like protein) (Dnm1p/Vps1p-like protein) (DVLP) (Dynamin family member proline-rich carboxyl-terminal domain less) (Dymple) (Dynamin-related protein 1) (Dynamin-like protein 4) (Dynamin-like	DNM1L_HUMAN	N	0.974598	1.24836	0.336663	2.31148	2.37678	2.86157	0.475081	0.954805	0.45532	1.306	3
518508	Q15063	Periostin precursor (PN) (Osteoblast-specific factor 2) (OSF-2) - Homo sapiens (Human)	POSTN_HUMAN	N	0.974928	1	106.096	11.2848	0.104902	0.0699703	1	10.9343	1	1	3
517876	Q9UKS6	Protein kinase C and casein kinase substrate in neurons protein 3 (SH3 domain-containing protein 6511) (Endophilin I) - Homo sapiens (Human)	PACN3_HUMAN	N	0.975271	1	0.393896	3.99672	2.11246	1	0.253853	0.30297	2.06898	1	3
509066	Q01484	Ankyrin-2 (Brain ankyrin) (Ankyrin-B) (Ankyrin, nonerythroid) - Homo sapiens (Human)	ANK2_HUMAN	N	0.979797	1	28.896	0.568026	2.33888	0.00982965	3.32204	0.30297	0.696694	0.706448	3
512172	P27487	Dipeptidyl peptidase 4 (EC 3.4.14.5) (Dipeptidyl peptidase IV) (DPP IV) (T-cell activation antigen CD26) (TP103) (Adenosine deaminase complexing protein 2) (ADABP) [Contains: Dipeptidyl peptidase 4 membrane form (Dipeptidyl peptidase IV	DPP4_HUMAN	Y	0.983008	0.942153	1.90858	0.300372	2.9841	0.146	1.02021	6.49242	1	3.51679	3
512757	Q9UKR5	Probable ergosterol biosynthetic protein 28 - Homo sapiens (Human)	ERG28_HUMAN	Y	0.98588	0.113514	0.714092	0.214765	3.11483	1	1	1	2.36777	7.59345	3
513814	P01909	HLA class II histocompatibility antigen, DQ(3) alpha chain precursor (DC-alpha) (HLA-DCA) (HLA-DQA1*05011) (HLA-DQA1*0502) - Homo sapiens (Human)	HA23_HUMAN	Y	0.987195	1	4.89129	0.513764	0.540282	4.38395	1	6.83327	1	0.822158	3
519624	P82933	28S ribosomal protein S9, mitochondrial precursor (S9mt) (MRP-S9) - Homo sapiens (Human)	RT09_HUMAN	N	0.987796	0.149139	0.525194	1	3.11483	1	0.693126	4.78274	1	2.02908	3
518009	Q8WW12	PEST proteolytic signal-containing nuclear protein (PEST-containing nuclear protein) (PCNP) - Homo sapiens (Human)	PCNP_HUMAN	N	0.990742	0.608684	0.3365	2.94799	1.18384	8.48212	2.59131	0.65958	1.94862	0.586501	3
521112	P26639	Threonyl-tRNA synthetase, cytoplasmic (EC 6.1.1.3) (Threonine--tRNA ligase) (ThrRS) - Homo sapiens (Human)	SYTC_HUMAN	N	0.995639	1.05481	0.227297	2.51285	4.04774	2.80802	0.829036	0.848494	1.012	0.765462	3
522364	P46939	Utrophin (Dystrophin-related protein 1) (DRP1) (DRP) - Homo sapiens (Human)	UTRO_HUMAN	N	0.995956	0.514758	0.75518	1.93164	3.11764	0.326826	13.9189	6.49242	1	0.870192	3
510912	P09496	Clathrin light chain A (Lca) - Homo sapiens (Human)	CLCA_HUMAN	N	0.00962785	0.953277	1.03268	1.35578	1.25961	1.947	3.25267	2.16536	1.39875	0.942854	2
522426	Q15836	Vesicle-associated membrane protein 3 (VAMP-3) (Synaptobrevin-3) (Cellubrevin) (CEB) - Homo sapiens (Human)	VAMP3_HUMAN	Y	0.0140613	1.75414	5.68918	1.27445	1.03408	1.4174	1.97751	5.32726	1.64511	1.04902	2
509371	Q9UBL3	Set1/Ash2 histone methyltransferase complex subunit ASH2 (ASH2-like protein) - Homo sapiens (Human)	ASH2L_HUMAN	N	0.0323513	0.113514	0.154393	3.99672	3.37019	0.09767	0.292895	0.291225	0.554595	0.649339	2
522425	P63027	Vesicle-associated membrane protein 2 (VAMP-2) (Synaptobrevin-2) - Homo sapiens (Human)	VAMP2_HUMAN	Y	0.0344847	1.97798	3.89603	1.27445	1.23602	1.4174	1.20892	4.0024	1.36781	0.852177	2
520139	Q9BWM7	Sideroflexin-3 - Homo sapiens (Human)	SFXN3_HUMAN	Y	0.0425712	1.16242	1.10704	0.883574	1.02911	1.78619	0.839007	2.97371	4.08359	1.16697	2
508585	Q9UG63	ATP-binding cassette sub-family F member 2 (Iron-inhibited ABC transporter 2) - Homo sapiens (Human)	ABCF2_HUMAN	N	0.0432144	0.865268	0.0877058	0.214765	5.18297	4.38395	0.768587	0.0989938	0.0704813	0.25055	2
520400	P54920	Alpha-soluble NSF attachment protein (SNAP-alpha) (N-ethylmaleimide-sensitive factor attachment protein, alpha) - Homo sapiens (Human)	SNAA_HUMAN	N	0.0467454	0.993383	3.90221	1.09455	1.04508	1.47658	1.08832	1.81159	1.16282	2.35054	2
521256	P31483	Nucleolysin TIA-1 isoform p40 (RNA-binding protein TIA-1) (p40-TIA-1) [Contains: Nucleolysin TIA-1 isoform p15 (p15-TIA-1)] - Homo sapiens (Human)	TIA1_HUMAN	N	0.0510943	0.369796	0.0676851	1	3.62555	4.38395	0.662418	0.199301	0.0576756	0.423446	2
517703	Q8NGK5	Olfactory receptor 52M1 (Olfactory receptor OR11-11) - Homo sapiens (Human)	O52M1_HUMAN	Y	0.0669044	0.739592	0.296512	0.14542	3.37019	4.3125	0.253853	0.296981	0.798196	0.15941	2
512116	Q9H4G0	Band 4.1-like protein 1 (Neuronal protein 4.1) (4.1N) - Homo sapiens (Human)	E41L1_HUMAN	N	0.0729713	0.063651	3.29447	0.334985	2.48026	0.413747	0.112984	0.37797	0.108002	0.942854	2
511898	Q9UJU6	Drebrin-like protein (SH3 domain-containing protein 7) (Drebrin F) (Cervical SH3P7) (HPK1-interacting protein of 55 kDa) (HIP-55) (Cervical mucin-associated protein) - Homo sapiens (Human)	DBNL_HUMAN	N	0.0745733	1.57227	0.904715	3.22427	1.27522	58.2545	1.07659	0.989948	1.64847	1.03573	2
518133	Q969N2	GPI transamidase component PIG-T precursor (Phosphatidylinositol-glycan biosynthesis class T protein) - Homo sapiens (Human)	PIGT_HUMAN	Y	0.0753459	0.0555214	0.0741279	0.0715883	0.324525	4.24106	1.45889	0.148491	2.62513	0.550337	2
513372	P52565	Rho GDP-dissociation inhibitor 1 (Rho GDI 1) (Rho-GDI alpha) - Homo sapiens (Human)	GDIR_HUMAN	N	0.0755722	1.44523	1.14851	2.19729	1.23411	1.97321	0.945729	1.37809	2.16858	1.18572	2
522480	P21281	Vacuolar ATP synthase subunit B, brain isoform (EC 3.6.3.14) (V-ATPase B2 subunit) (Vacuolar proton pump B isoform 2) (Endomembrane proton pump 58 kDa subunit) (HO57) - Homo sapiens (Human)	VATB2_HUMAN	N	0.0756153	1.44481	2.52328	1.5095	0.898309	7.22747	1.81641	1.90226	1.5036	0.999176	2
513178	P11413	Glucose-6-phosphate 1-dehydrogenase (EC 1.1.1.49) (G6PD) - Homo sapiens (Human)	G6PD_HUMAN	N	0.0783903	1.52619	1.81077	16.1393	1.01869	9.73096	1.48782	1.2832	1.13479	0.920639	2
516226	P36507	Dual specificity mitogen-activated protein kinase kinase 2 (EC 2.7.12.2) (MAP kinase kinase 2) (MAPKK 2) (ERK activator kinase 2) (MAPK/ERK kinase 2) (MEK2) - Homo sapiens (Human)	MP2K2_HUMAN	N	0.0836053	0.189267	0.719082	0.401636	1.01957	0.416992	0.26549	2.73955	0.715886	2.85381	2
512302	Q14232	Translation initiation factor eIF-2B subunit alpha (eIF-2B GDP-GTP exchange factor subunit alpha) - Homo sapiens (Human)	EI2BA_HUMAN	N	0.0838219	0.227027	0.203055	3.99672	6.99574	1	0.135637	0.059632	0.494481	0.31709	2
513480	Q4V328	GRIP1-associated protein 1 (GRASP-1) - Homo sapiens (Human)	GRAP1_HUMAN	N	0.0902943	0.930903	0.0962856	2.51285	0.481156	0.842405	3.32204	0.485256	0.140963	0.233781	2
512082	P26358	DNA (cytosine-5)-methyltransferase 1 (EC 2.1.1.37) (Dnmt1) (DNA methyltransferase HsaI) (DNA MTase HsaI) (MCMT) (M.HsaI) - Homo sapiens (Human)	DNMT1_HUMAN	N	0.0916255	0.760635	0.409026	1.35353	1.75373	1.00949	1.50112	1.83848	11.803	3.6648	2
516766	O60551	Glycylpeptide N-tetradecanoyltransferase 2 (EC 2.3.1.97) (Peptide N-myristoyltransferase 2) (Myristoyl-CoA:protein N-myristoyltransferase 2) (NMT 2) (Type II N-myristoyltransferase) - Homo sapiens (Human)	NMT2_HUMAN	N	0.0975333	1	0.148256	0.214765	3.62555	1	3.02769	0.147038	0.140963	0.822158	2
522301	P62988	Ubiquitin - Homo sapiens (Human)	UBIQ_HUMAN	N	0.101257	1.27935	1.15276	1.11209	1.62457	0.213451	1.72561	5.07437	2.18641	1.04521	2
508489	P01009	Alpha-1-antitrypsin precursor (Alpha-1 protease inhibitor) (Alpha-1-antiproteinase) - Homo sapiens (Human)	A1AT_HUMAN	N	0.10433	1.9136	4.80252	0.97137	0.689986	2.46464	1.30785	1.72454	0.0904742	1.60088	2
517431	P21953	2-oxoisovalerate dehydrogenase subunit beta, mitochondrial precursor (EC 1.2.4.4) (Branched-chain alpha-keto acid dehydrogenase E1 component beta chain) (BCKDH E1-beta) - Homo sapiens (Human)	ODBB_HUMAN	N	0.109569	0.516667	2.40623	0.593361	0.258457	0.250979	3.19	0.581457	1.18397	0.588599	2
513754	Q16695	Histone H3.1t (H3t) (H3/t) (H3/g) - Homo sapiens (Human)	H31T_HUMAN	N	0.110165	0.693777	1.17625	1.79485	0.824751	0.739548	1.48308	1.80267	9.61486	6.50406	2
513841	P30511	HLA class I histocompatibility antigen, alpha chain F precursor (HLA F antigen) (Leukocyte antigen F) (CDA12) - Homo sapiens (Human)	HLAF_HUMAN	Y	0.112613	1.32695	6.16912	1.76738	1.61728	1.1716	1.95496	0.969797	4.1993	1.35083	2
516046	O60664	Mannose-6-phosphate receptor-binding protein 1 (Cargo selection protein TIP47) (47 kDa mannose 6-phosphate receptor-binding protein) (47 kDa MPR-binding protein) (Placental protein 17) (PP17) - Homo sapiens (Human)	M6PBP_HUMAN	N	0.113776	1.87108	0.874849	0.996	1.84734	5.97014	1.76271	3.53931	0.503385	1.19486	2
522236	Q8WVY7	Ubiquitin-like domain-containing CTD phosphatase 1 (EC 3.1.3.16) - Homo sapiens (Human)	UBCP1_HUMAN	N	0.115897	0.369076	0.0574746	0.276208	6.22966	8.48212	0.162036	0.30297	0.411089	0.623848	2
517210	Q5SY16	Nucleolar protein 9 - Homo sapiens (Human)	NOL9_HUMAN	N	0.121754	0.0756757	0.203055	3.99672	7.25111	0.19534	0.162375	0.0598696	0.554426	0.671822	2
510195	P52907	F-actin capping protein alpha-1 subunit (CapZ alpha-1) - Homo sapiens (Human)	CAZA1_HUMAN	N	0.122582	2.2427	1.66366	1.53329	1.15274	4.0153	0.864959	1.2116	0.719449	0.852152	2
508450	Q66LE6	Serine/threonine-protein phosphatase 2A 55 kDa regulatory subunit B delta isoform (PP2A, subunit B, B-delta isoform) (PP2A, subunit B, B55-delta isoform) (PP2A, subunit B, PR55-delta isoform) (PP2A, subunit B, R2-delta isoform) - Homo s	2ABD_HUMAN	N	0.123132	3.40269	1	1	0.826753	4.24106	1.8167	1.19433	1.82693	1.76226	2
518685	P48556	26S proteasome non-ATPase regulatory subunit 8 (26S proteasome regulatory subunit S14) (p31) - Homo sapiens (Human)	PSMD8_HUMAN	N	0.124091	1.682	1.57558	1.48126	1.29318	45.3885	3.24336	1.04749	0.988962	0.956149	2
518195	O15212	Prefoldin subunit 6 (Protein Ke2) - Homo sapiens (Human)	PFD6_HUMAN	N	0.124385	0.108677	0.203055	1	3.11483	0.146	3.17486	1	1	0.25055	2
516785	Q8WX92	Negative elongation factor B (NELF-B) (Cofactor of BRCA1) - Homo sapiens (Human)	NELFB_HUMAN	N	0.125204	3.40269	1	0.29084	3.11483	1	0.331209	0.199301	0.285277	0.125275	2
515607	Q96AG4	Leucine-rich repeat-containing protein 59 - Homo sapiens (Human)	LRC59_HUMAN	Y	0.125577	1.00575	0.820679	1.24813	1.18217	5.28727	1.0625	1.30135	2.08707	1.03632	2
514979	Q92876	Kallikrein-6 precursor (EC 3.4.21.-) (Protease M) (Neurosin) (Zyme) (SP59) - Homo sapiens (Human)	KLK6_HUMAN	N	0.127106	0.304097	0.255085	0.12354	1	8.48212	0.146448	0.357102	3.66939	0.463945	2
520894	Q9Y2Z4	Tyrosyl-tRNA synthetase, mitochondrial precursor (EC 6.1.1.1) (Tyrosine--tRNA ligase) (TyrRS) - Homo sapiens (Human)	SYYM_HUMAN	N	0.13188	0.230165	0.0726833	1.22508	0.566085	0.146	0.244223	0.408671	8.3986	8.93195	2
513423	P06396	Gelsolin precursor (Actin-depolymerizing factor) (ADF) (Brevin) (AGEL) - Homo sapiens (Human)	GELS_HUMAN	N	0.136518	0.891976	2.04782	2.31623	0.828894	1.36263	1.7443	1.53286	1.69142	0.978892	2
520758	O43278	Kunitz-type protease inhibitor 1 precursor (Hepatocyte growth factor activator inhibitor type 1) (HAI-1) - Homo sapiens (Human)	SPIT1_HUMAN	Y	0.138988	1	0.171428	3.99672	0.962312	1	0.376636	0.401114	0.0725094	3.79672	2
508487	P19652	Alpha-1-acid glycoprotein 2 precursor (AGP 2) (Orosomucoid-2) (OMD 2) - Homo sapiens (Human)	A1AG2_HUMAN	N	0.141103	1.65871	2.61533	1.26371	1.36076	2.77191	1.56563	1.74405	0.0288378	1.13801	2
514876	Q15397	Protein KIAA0020 (HBV X-transactivated gene 5 protein) (Minor histocompatibility antigen HA-8) (HLA-HA8) - Homo sapiens (Human)	K0020_HUMAN	N	0.144283	0.116097	0.274675	1	3.11483	1	0.058579	1	0.289312	3.79672	2
514365	Q8WVV9	Heterogeneous nuclear ribonucleoprotein L-like (Stromal RNA-regulating factor) (BLOCK24 protein) - Homo sapiens (Human)	HNRLL_HUMAN	N	0.144677	0.377845	0.409725	1	3.62555	0.414225	0.768587	2.58718	0.266065	0.308985	2
519033	Q9UKL0	REST corepressor 1 (Protein CoREST) - Homo sapiens (Human)	RCOR1_HUMAN	N	0.146273	1.0429	0.589503	0.29084	1.68708	4.38395	3.02769	0.151485	0.15697	0.0835167	2
509022	Q9BY76	Angiopoietin-related protein 4 precursor (Angiopoietin-like 4) (Hepatic fibrinogen/angiopoietin-related protein) (HFARP) - Homo sapiens (Human)	ANGL4_HUMAN	N	0.150101	4.79812	1	1	1	1	4.68871	1	1	1	2
512747	Q16875	6-phosphofructo-2-kinase/fructose-2,6-biphosphatase 3 (6PF-2-K/Fru-2,6-P2ASE brain/placenta-type isozyme) (iPFK-2) (NY-REN-56 antigen) [Includes: 6-phosphofructo-2-kinase (EC 2.7.1.105); Fructose-2,6-bisphosphatase (EC 3.1.3.46)] - Homo	F263_HUMAN	N	0.150118	1	1	1	3.11483	1	3.02769	1	1	1	2
510062	P55211	Caspase-9 precursor (EC 3.4.22.-) (CASP-9) (ICE-like apoptotic protease 6) (ICE-LAP6) (Apoptotic protease Mch-6) (Apoptotic protease-activating factor 3) (APAF-3) [Contains: Caspase-9 subunit p35; Caspase-9 subunit p10] - Homo sapiens	CASP9_HUMAN	N	0.150126	1	1	1	3.62555	1	1	1	1	3.51679	2
513244	Q9H3K2	Growth hormone-inducible transmembrane protein (Dermal papilla-derived protein 2) (Transmembrane BAX inhibitor motif-containing protein 5) - Homo sapiens (Human)	GHITM_HUMAN	Y	0.150135	3.40269	1	1	1	1	1	1	1	3.51679	2
515220	Q8N752	Casein kinase I isoform alpha-like (EC 2.7.11.1) (CKI-alpha-like) (CK1) - Homo sapiens (Human)	KC1AL_HUMAN	N	0.15014	1	1	1	1	1	1	1	3.66939	3.79672	2
511255	Q02928	Cytochrome P450 4A11 precursor (EC 1.14.15.3) (CYPIVA11) (Fatty acid omega-hydroxylase) (P-450 HK omega) (Lauric acid omega-hydroxylase) (CYP4AII) (P450-HL-omega) - Homo sapiens (Human)	CP4AB_HUMAN	Y	0.150182	1	1	1	1	4.38395	1	1	4.1993	1	2
513654	P08754	Guanine nucleotide-binding protein G(k) subunit alpha (G(i) alpha-3) - Homo sapiens (Human)	GNAI3_HUMAN	N	0.150184	1.62616	6.48399	1.50334	0.715461	3.47367	0.799135	1.81392	0.797901	0.861664	2
516031	Q93074	Mediator of RNA polymerase II transcription subunit 12 (Thyroid hormone receptor-associated protein complex 230 kDa component) (Trap230) (Activator-recruited cofactor 240 kDa component) (ARC240) (CAG repeat protein 45) (OPA-containing	MED12_HUMAN	N	0.150199	1	1	1	3.62555	1	1	1	1	3.79672	2
522813	Q9NYG2	Palmitoyltransferase ZDHHC3 (EC 2.3.1.-) (Zinc finger DHHC domain-containing protein 3) (DHHC-3) (Zinc finger protein 373) (DHHC1 protein) - Homo sapiens (Human)	ZDHC3_HUMAN	Y	0.150219	1	1	3.99672	1	1	1	1	4.1993	1	2
509841	P21730	C5a anaphylatoxin chemotactic receptor (C5a-R) (C5aR) (CD88 antigen) - Homo sapiens (Human)	C5AR_HUMAN	Y	0.150224	1	1	1	1	4.3125	1	4.10105	1	1	2
521177	Q12788	WD repeat protein SAZD (Transducin beta-like 3 protein) - Homo sapiens (Human)	TBL3_HUMAN	N	0.150244	1	1.45032	1	3.11483	1	0.0425461	0.118325	0.0576756	3.51679	2
520224	Q9BX95	Sphingosine-1-phosphate phosphatase 1 (EC 3.1.3.-) (Sphingosine-1-phosphatase 1) (SPPase1) (Spp1) (hSPPase1) - Homo sapiens (Human)	SGPP1_HUMAN	Y	0.150268	1	1	1	1	1	3.32204	1	1	3.51679	2
513260	P50151	Guanine nucleotide-binding protein G(I)/G(S)/G(O) gamma-10 subunit precursor - Homo sapiens (Human)	GBG10_HUMAN	N	0.150285	1	1	3.99672	1	4.24106	1	1	1	1	2
522246	Q9NYU1	UDP-glucose:glycoprotein glucosyltransferase 2 precursor (EC 2.4.1.-) (UDP-glucose ceramide glucosyltransferase-like 1) (UDP--Glc:glycoprotein glucosyltransferase 2) (HUGT2) - Homo sapiens (Human)	UGGG2_HUMAN	N	0.150341	1	1	1	1	4.38395	1	4.10105	1	1	2
520971	Q9Y228	TRAF3-interacting JNK-activating modulator (TRAF3-interacting protein 3) - Homo sapiens (Human)	T3JAM_HUMAN	Y	0.150444	1	4.89129	5.28975	1	1	1	1	1	1	2
510744	Q8TDQ1	CMRF35-like-molecule 1 precursor (CLM-1) (Immune receptor expressed on myeloid cells protein 1) (IREM-1) (Immunoglobulin superfamily member 13) (NK inhibitory receptor) (CD300 antigen like family member F) (IgSF13) - Homo sapiens (Human	CLM1_HUMAN	Y	0.150592	1	1	3.99672	1	4.38395	1	1	1	1	2
518715	P23469	Receptor-type tyrosine-protein phosphatase epsilon precursor (EC 3.1.3.48) (Protein-tyrosine phosphatase epsilon) (R-PTP-epsilon) - Homo sapiens (Human)	PTPRE_HUMAN	Y	0.15065	1	1	3.99672	3.62555	1	1	1	1	1	2
519509	O14730	Serine/threonine-protein kinase RIO3 (EC 2.7.11.1) (RIO kinase 3) (sudD homolog) - Homo sapiens (Human)	RIOK3_HUMAN	N	0.15065	1	1	3.99672	3.62555	1	1	1	1	1	2
522876	P24278	Zinc finger and BTB domain-containing protein 25 (Zinc finger protein 46) (Zinc finger protein KUP) - Homo sapiens (Human)	ZBT25_HUMAN	N	0.150674	1	1	1	1	1	3.32204	1	3.66939	1	2
522902	Q8N680	Zinc finger and BTB domain-containing protein 2 - Homo sapiens (Human)	ZBTB2_HUMAN	N	0.150674	1	1	1	1	1	3.32204	1	3.66939	1	2
521731	O75888	Tumor necrosis factor ligand superfamily member 13 precursor (A proliferation-inducing ligand) (APRIL) (TNF- and APOL-related leukocyte expressed ligand 2) (TALL-2) (TNF-related death ligand 1) (TRDL-1) (CD256 antigen) - Homo sapiens (	TNF13_HUMAN	Y	0.150724	1	1	1	1	4.3125	1	4.78274	1	1	2
509993	P20138	Myeloid cell surface antigen CD33 precursor (Sialic acid-binding Ig-like lectin 3) (Siglec-3) (gp67) - Homo sapiens (Human)	CD33_HUMAN	Y	0.150802	1	4.89129	1	1	4.38395	1	1	1	1	2
522288	Q96T88	Ubiquitin-like PHD and RING finger domain-containing protein 1 (EC 6.3.2.-) (Ubiquitin-like-containing PHD and RING finger domains protein 1) (Inverted CCAAT box-binding protein of 90 kDa) (Transcription factor ICBP90) (Nuclear zinc fi	UHRF1_HUMAN	N	0.151145	1	1	1	3.62555	1	3.17486	1	1	1	2
521487	Q9H3S4	Thiamin pyrophosphokinase 1 (EC 2.7.6.2) (Thiamine pyrophosphokinase 1) (hTPK1) (Placental protein 20) (PP20) - Homo sapiens (Human)	TPK1_HUMAN	N	0.151386	1	1	1	3.62555	1	1	1	4.1993	1	2
517169	Q9Y2C4	Endonuclease G-like 1 (EC 3.1.30.-) (Endo G-like) - Homo sapiens (Human)	NUCGL_HUMAN	Y	0.151437	1	1	1	1	1	3.02769	1	1	3.51679	2
520247	O15047	Histone-lysine N-methyltransferase, H3 lysine-4 specific SET1 (EC 2.1.1.43) (Set1/Ash2 histone methyltransferase complex subunit SET1) (SET-domain-containing protein 1A) - Homo sapiens (Human)	SET1A_HUMAN	N	0.151437	1	1	1	1	1	3.02769	1	1	3.51679	2
513132	P07902	Galactose-1-phosphate uridylyltransferase (EC 2.7.7.12) (Gal-1-P uridylyltransferase) (UDP-glucose--hexose-1-phosphate uridylyltransferase) - Homo sapiens (Human)	GALT_HUMAN	N	0.151568	1	1	1	3.62555	4.24106	1	1	1	1	2
517116	Q9NP64	Nucleolar protein of 40 kDa (pNO40) (Zinc finger CCHC domain-containing protein 17) (Putative S1 RNA-binding domain protein) (PS1D protein) (Pnn-interacting nucleolar protein) - Homo sapiens (Human)	NO40_HUMAN	N	0.151705	1	1	1	3.11483	1	1	1	3.66939	1	2
518505	Q9P212	1-phosphatidylinositol-4,5-bisphosphate phosphodiesterase epsilon 1 (EC 3.1.4.11) (Phospholipase C-epsilon-1) (PLC-epsilon-1) (Phosphoinositide-specific phospholipase C epsilon-1) (Pancreas-enriched phospholipase C) - Homo sapiens (Hum	PLCE1_HUMAN	N	0.151705	1	1	1	3.11483	1	1	1	3.66939	1	2
512838	Q9NUQ9	Protein FAM49B (L1) - Homo sapiens (Human)	FA49B_HUMAN	N	0.151805	2.26897	0.976234	1.91189	1.77964	5.58792	0.701304	0.670891	1.25718	1.01624	2
510049	Q9BSQ5	Malcavernin (Cerebral cavernous malformations 2 protein) - Homo sapiens (Human)	CCM2_HUMAN	N	0.152031	1	1	3.99672	1	1	1	4.78274	1	1	2
513822	Q7Z4Q2	HEAT repeat-containing protein 3 - Homo sapiens (Human)	HEAT3_HUMAN	N	0.152046	1	1	1	3.62555	1	3.02769	1	1	1	2
517482	Q5VU65	Nuclear pore membrane glycoprotein 210-like precursor (Nucleoporin 210 kDa-like) - Homo sapiens (Human)	P210L_HUMAN	Y	0.152046	1	1	1	3.62555	1	3.02769	1	1	1	2
521984	Q8WVT3	Tetratricopeptide repeat protein 15 (TPR repeat protein 15) - Homo sapiens (Human)	TTC15_HUMAN	N	0.152046	1	1	1	3.62555	1	3.02769	1	1	1	2
513738	Q14409	Glycerol kinase, testis specific 1 (EC 2.7.1.30) (ATP:glycerol 3-phosphotransferase) (Glycerokinase) (GK) - Homo sapiens (Human)	GLPK3_HUMAN	N	0.152263	1	1	1	3.62555	4.38395	1	1	1	1	2
513739	P32189	Glycerol kinase (EC 2.7.1.30) (ATP:glycerol 3-phosphotransferase) (Glycerokinase) (GK) - Homo sapiens (Human)	GLPK_HUMAN	N	0.152263	1	1	1	3.62555	4.38395	1	1	1	1	2
513958	P43250	G protein-coupled receptor kinase 6 (EC 2.7.11.16) (G protein-coupled receptor kinase GRK6) - Homo sapiens (Human)	GRK6_HUMAN	N	0.152547	1	4.89129	3.99672	1	1	1	1	1	1	2
520152	Q13239	SRC-like-adapter (Src-like-adapter protein 1) (hSLAP) - Homo sapiens (Human)	SLAP1_HUMAN	N	0.152547	1	4.89129	3.99672	1	1	1	1	1	1	2
518887	Q8NDX1	PH and SEC7 domain-containing protein 4 (Pleckstrin homology and SEC7 domain-containing protein 4) (Exchange factor for ADP-ribosylation factor guanine nucleotide factor 6B) (Telomeric of interleukin-1 cluster protein) - Homo sapiens (H	PSD4_HUMAN	N	0.153029	1	1	5.28975	1	4.24106	1	1	1	1	2
521077	O75528	Transcriptional adapter 3-like (ADA3-like protein) (ADA3 homolog) (hADA3) - Homo sapiens (Human)	TAD3L_HUMAN	N	0.153174	1	1	1	1	1	3.02769	1	1	3.79672	2
515788	Q8N6C8	Leukocyte immunoglobulin-like receptor subfamily A member 3 precursor (Leukocyte immunoglobulin-like receptor 4) (LIR-4) (Immunoglobulin-like transcript 6) (ILT-6) (Monocyte inhibitory receptor HM43/HM31) (CD85e antigen) - Homo sapiens	LIRA3_HUMAN	N	0.153269	1	1	1	3.37019	4.24106	1	1	1	1	2
515789	P59901	Leukocyte immunoglobulin-like receptor subfamily A member 4 precursor (Immunoglobulin-like transcript 7) (ILT-7) (CD85g antigen) - Homo sapiens (Human)	LIRA4_HUMAN	N	0.153269	1	1	1	3.37019	4.24106	1	1	1	1	2
516065	Q14244	Ensconsin (Microtubule-associated protein 7) (Epithelial microtubule-associated protein of 115 kDa) (E-MAP-115) - Homo sapiens (Human)	MAP7_HUMAN	N	0.153394	1	1	1	1	1	3.32204	1	4.1993	1	2
510592	Q15027	Centaurin-beta 1 (Cnt-b1) - Homo sapiens (Human)	CENB1_HUMAN	N	0.153664	1	5.92505	4.64323	1	1	1	1	1	1	2
510360	Q8WUH1	Churchill protein - Homo sapiens (Human)	CHUR_HUMAN	N	0.153826	1	1	3.99672	3.11483	1	1	1	1	1	2
516779	Q9HCJ2	Netrin-G1 ligand precursor (NGL-1) (Leucine-rich repeat-containing protein 4C) - Homo sapiens (Human)	NGL1_HUMAN	Y	0.153826	1	1	3.99672	3.11483	1	1	1	1	1	2
510758	P13671	Complement component C6 precursor - Homo sapiens (Human)	CO6_HUMAN	N	0.153946	1	4.89129	1	1	1	1	1	1	3.79672	2
514499	P01880	Ig delta chain C region - Homo sapiens (Human)	IGHD_HUMAN	N	0.153946	1	4.89129	1	1	1	1	1	1	3.79672	2
522107	Q16831	Uridine phosphorylase 1 (EC 2.4.2.3) (UrdPase 1) (UPase 1) - Homo sapiens (Human)	UPP1_HUMAN	N	0.153983	1	1	5.28975	1	1	1	4.10105	1	1	2
517334	Q96CV9	Optineurin (Optic neuropathy-inducing protein) (E3-14.7K-interacting protein) (FIP-2) (Huntingtin-interacting protein HYPL) (NEMO-related protein) (Transcription factor IIIA-interacting protein) (TFIIIA-IntP) - Homo sapiens (Human)	OPTN_HUMAN	N	0.15421	1	1	1	1	1	3.02769	1	3.93434	1	2
522357	P49754	Vacuolar protein sorting-associated protein 41 homolog (S53) - Homo sapiens (Human)	VPS41_HUMAN	N	0.154628	1	1	1	3.11483	1	1	4.10105	1	1	2
508550	Q86UQ4	ATP-binding cassette sub-family A member 13 - Homo sapiens (Human)	ABCAD_HUMAN	Y	0.154692	1	1	1	3.62555	1	1	4.78274	1	1	2
520531	Q8WU79	Stromal membrane-associated protein 1-like - Homo sapiens (Human)	SMP1L_HUMAN	N	0.154692	1	1	1	3.62555	1	1	4.78274	1	1	2
513772	P49841	Glycogen synthase kinase-3 beta (EC 2.7.11.26) (GSK-3 beta) - Homo sapiens (Human)	GSK3B_HUMAN	N	0.154714	1	1	3.99672	1	1	3.02769	1	1	1	2
518502	O00562	Membrane-associated phosphatidylinositol transfer protein 1 (Phosphatidylinositol transfer protein, membrane-associated 1) (Pyk2 N-terminal domain-interacting receptor 2) (NIR-2) (Drosophila retinal degeneration B homolog) - Homo sapie	PITM1_HUMAN	N	0.154779	1	1	1	1	1	3.17486	1	4.1993	1	2
516705	P78426	Homeobox protein Nkx-6.1 - Homo sapiens (Human)	NKX61_HUMAN	N	0.154797	4.79812	1	1	3.62555	1	1	1	1	1	2
520712	P42224	Signal transducer and activator of transcription 1-alpha/beta (Transcription factor ISGF-3 components p91/p84) - Homo sapiens (Human)	STAT1_HUMAN	N	0.155361	1.32138	18.7832	1.48588	1.54216	2.32862	1.39096	0.942204	0.962888	0.868956	2
512787	O75063	Protein FAM20B precursor - Homo sapiens (Human)	FA20B_HUMAN	Y	0.15543	1	1	1	3.11483	1	1	1	4.1993	1	2
511226	P07333	Macrophage colony-stimulating factor 1 receptor precursor (EC 2.7.10.1) (CSF-1-R) (Fms proto-oncogene) (c-fms) (CD115 antigen) - Homo sapiens (Human)	CSF1R_HUMAN	Y	0.155455	1	4.89129	1	3.62555	1	1	1	1	1	2
514937	Q13797	Integrin alpha-9 precursor (Integrin alpha-RLC) - Homo sapiens (Human)	ITA9_HUMAN	Y	0.155455	1	4.89129	1	3.62555	1	1	1	1	1	2
508571	Q9NUT2	ATP-binding cassette sub-family B member 8, mitochondrial precursor (Mitochondrial ATP-binding cassette 1) (M-ABC1) - Homo sapiens (Human)	ABCB8_HUMAN	Y	0.155591	4.10041	1	1	1	1	3.02769	1	1	1	2
512802	Q9HA72	Protein FAM26B - Homo sapiens (Human)	FA26B_HUMAN	Y	0.155783	1	1	1	3.11483	4.24106	1	1	1	1	2
515764	Q9Y6Y9	Lymphocyte antigen 96 precursor (MD-2 protein) (ESOP-1) - Homo sapiens (Human)	LY96_HUMAN	N	0.155783	1	1	1	3.11483	4.24106	1	1	1	1	2
522464	P38607	Vacuolar ATP synthase catalytic subunit A, osteoclast isoform (EC 3.6.3.14) (V-ATPase subunit A 2) (Vacuolar proton pump alpha subunit 2) (V-ATPase 69 kDa subunit 2) (Isoform HO68) - Homo sapiens (Human)	VATA2_HUMAN	N	0.155853	0.875839	1.98338	0.601104	1.34084	4.31188	3.04226	0.893045	1.72796	1.28232	2
511229	Q9Y2Z9	Ubiquinone biosynthesis monooxygenase COQ6 (EC 1.14.13.-) - Homo sapiens (Human)	COQ6_HUMAN	N	0.156485	0.0916263	0.116748	1	1	0.09767	1.53717	0.0850921	3.66939	2.00677	2
510841	P07357	Complement component C8 alpha chain precursor (Complement component 8 subunit alpha) - Homo sapiens (Human)	CO8A_HUMAN	N	0.156577	1	4.89129	1	1	1	1	1	1	3.51679	2
511228	P15509	Granulocyte-macrophage colony-stimulating factor receptor alpha chain precursor (GM-CSF-R-alpha) (GMR) (CD116 antigen) (CDw116) - Homo sapiens (Human)	CSF2R_HUMAN	Y	0.156577	1	4.89129	1	1	1	1	1	1	3.51679	2
513992	Q30201	Hereditary hemochromatosis protein precursor (HLA-H) - Homo sapiens (Human)	HFE_HUMAN	Y	0.156577	1	4.89129	1	1	1	1	1	1	3.51679	2
515747	Q13342	Nuclear body protein SP140 (Nuclear autoantigen Sp-140) (Speckled 140 kDa) (LYSp100 protein) (Lymphoid-restricted homolog of Sp100) - Homo sapiens (Human)	LY10_HUMAN	N	0.156577	1	4.89129	1	1	1	1	1	1	3.51679	2
519347	P40937	Replication factor C subunit 5 (Replication factor C 36 kDa subunit) (RF-C 36 kDa subunit) (RFC36) (Activator 1 36 kDa subunit) (A1 36 kDa subunit) - Homo sapiens (Human)	RFC5_HUMAN	N	0.156815	0.431878	0.192571	3.99672	6.74038	0.146	1.07243	0.148491	0.250986	0.706945	2
508404	P30464	HLA class I histocompatibility antigen, B-15 alpha chain precursor (MHC class I antigen B*15) - Homo sapiens (Human)	1B15_HUMAN	Y	0.15739	1.18269	8.37931	1.53197	1.10517	1.00522	2.07826	1.71335	0.633799	0.706976	2
519416	Q9H6H4	Receptor expression-enhancing protein 4 - Homo sapiens (Human)	REEP4_HUMAN	Y	0.158033	1	1	1	1	1	6.05538	1	4.1993	1	2
521621	Q9NR97	Toll-like receptor 8 precursor (CD288 antigen) - Homo sapiens (Human)	TLR8_HUMAN	Y	0.158829	1	1	1	6.22966	4.24106	1	1	1	1	2
516399	Q96LB2	Mas-related G-protein coupled receptor member X1 (Sensory neuron-specific G-protein coupled receptor 3/4) - Homo sapiens (Human)	MRGX1_HUMAN	Y	0.159238	1	5.92505	3.99672	1	1	1	1	1	1	2
520216	Q9NRX5	Serine incorporator 1 (Tumor differentially expressed protein 2) (Tumor differentially expressed 1 protein-like) - Homo sapiens (Human)	SERC1_HUMAN	Y	0.159316	3.40269	1.57558	2.13475	0.962312	1.25663	0.973008	1.19433	1	1.7752	2
509781	Q9NZT1	Calmodulin-like protein 5 (Calmodulin-like skin protein) - Homo sapiens (Human)	CALL5_HUMAN	N	0.159901	10.9058	1	1	1	1	1	16.4042	1	1	2
521167	Q8WUA4	General transcription factor 3C polypeptide 2 (Transcription factor IIIC-subunit beta) (TF3C-beta) (TFIIIC 110 kDa subunit) (TFIIIC110) - Homo sapiens (Human)	TF3C2_HUMAN	N	0.16075	4.79812	0.16106	0.29084	0.126957	1	0.281141	2.02935	0.310415	1.18654	2
514593	O95373	Importin-7 (Imp7) (Ran-binding protein 7) (RanBP7) - Homo sapiens (Human)	IPO7_HUMAN	N	0.161049	0.431246	0.224035	0.217443	1.23698	2.36983	0.338784	0.668634	0.544588	2.54099	2
522537	Q9UKW4	Protein vav-3 - Homo sapiens (Human)	VAV3_HUMAN	N	0.161609	1	1	3.99672	6.22966	1	1	1	1	1	2
523034	Q9P2E3	NFX1-type zinc finger-containing protein 1 - Homo sapiens (Human)	ZNFX1_HUMAN	N	0.162281	1	1	1	1	1	3.02769	4.78274	1	1	2
521347	Q9BXI6	TBC1 domain family member 10A (EBP50-PDX interactor of 64 kDa) (EPI64 protein) - Homo sapiens (Human)	TBC10_HUMAN	N	0.162689	1	1	5.28975	1	1	3.32204	1	1	1	2
508569	Q9NP58	ATP-binding cassette sub-family B member 6, mitochondrial precursor (Mitochondrial ABC transporter 3) (Mt-ABC transporter 3) (ABC transporter umat) - Homo sapiens (Human)	ABCB6_HUMAN	Y	0.163444	1	4.89129	1	1	1	3.02769	1	1	1	2
522427	O75379	Vesicle-associated membrane protein 4 (VAMP-4) - Homo sapiens (Human)	VAMP4_HUMAN	Y	0.163444	1	4.89129	1	1	1	3.02769	1	1	1	2
521574	Q9BX59	Tapasin-related protein precursor (TAPASIN-R) (Tapasin-like) (TAP-binding protein-related protein) (TAPBP-R) (TAP-binding protein-like) - Homo sapiens (Human)	TPSNR_HUMAN	Y	0.163594	1	1	1	1	1	6.64408	4.10105	1	1	2
509176	O15143	Actin-related protein 2/3 complex subunit 1B (ARP2/3 complex 41 kDa subunit) (p41-ARC) - Homo sapiens (Human)	ARC1B_HUMAN	N	0.164179	1.13273	1.947	2.36114	1.01219	3.08289	0.916822	1.2551	0.715081	0.848568	2
511345	Q96MW5	Conserved oligomeric Golgi complex component 8 - Homo sapiens (Human)	COG8_HUMAN	N	0.164712	1	1	1	7.25111	4.38395	1	1	1	1	2
515666	Q12912	Lymphoid-restricted membrane protein (Protein Jaw1) - Homo sapiens (Human)	LRMP_HUMAN	Y	0.166187	1	1	5.28975	3.11483	1	1	1	1	1	2
521309	O14559	TC10/CDC42 GTPase-activating protein (Sorting nexin-26) - Homo sapiens (Human)	TCGAP_HUMAN	N	0.168759	1	1	1	3.62555	6.43303	1	1	1	1	2
510216	Q01518	Adenylyl cyclase-associated protein 1 (CAP 1) - Homo sapiens (Human)	CAP1_HUMAN	N	0.169705	1.05737	2.02593	1.72144	0.867812	3.11475	1.16203	1.02354	1.07057	1.00608	2
516286	Q8N3R9	MAGUK p55 subfamily member 5 - Homo sapiens (Human)	MPP5_HUMAN	N	0.169773	0.217355	0.154393	1	4.9276	0.19534	3.32204	0.30297	0.348347	0.661954	2
508773	Q9H2P0	Activity-dependent neuroprotector (Activity-dependent neuroprotective protein) - Homo sapiens (Human)	ADNP_HUMAN	N	0.170159	1.20323	0.137922	2.19142	2.20244	0.0731892	0.662418	0.817342	0.25864	0.685208	2
513656	P09471	Guanine nucleotide-binding protein G(o) subunit alpha 1 - Homo sapiens (Human)	GNAO1_HUMAN	N	0.174891	1.37156	4.65749	1.62828	0.806961	3.11878	1.47403	1.8897	0.829716	0.430712	2
521812	Q9NZC2	Triggering receptor expressed on myeloid cells 2 precursor (Triggering receptor expressed on monocytes 2) (TREM-2) - Homo sapiens (Human)	TREM2_HUMAN	Y	0.174982	1	1	1	8.2978	4.24106	1	1	1	1	2
513220	Q92908	Transcription factor GATA-6 (GATA-binding factor 6) - Homo sapiens (Human)	GATA6_HUMAN	N	0.177285	1	1	1	3.62555	1	1	1	7.33878	1	2
512539	Q5VYK3	Proteasome-associated protein ECM29 homolog (Ecm29) - Homo sapiens (Human)	ECM29_HUMAN	N	0.17755	0.702934	0.203055	1	8.04243	4.24106	0.315856	0.0496605	0.0976156	1	2
521537	Q9Y490	Talin-1 - Homo sapiens (Human)	TLN1_HUMAN	N	0.178012	1.1961	2.24454	2.30768	1.14658	1.67071	1.25136	1.63819	0.804149	1.13026	2
513886	P10746	Uroporphyrinogen-III synthase (EC 4.2.1.75) (UROS) (Uroporphyrinogen-III cosynthetase) (Hydroxymethylbilane hydrolyase [cyclizing]) (UROIIIS) - Homo sapiens (Human)	HEM4_HUMAN	N	0.178415	1	1	1	6.22966	1	3.02769	1	1	1	2
512706	Q14289	Protein tyrosine kinase 2 beta (EC 2.7.10.2) (Focal adhesion kinase 2) (FADK 2) (Proline-rich tyrosine kinase 2) (Cell adhesion kinase beta) (CAK beta) (Calcium-dependent tyrosine kinase) (CADTK) (Related adhesion focal tyrosine kinase)	FAK2_HUMAN	N	0.17856	1	1	1	7.25111	1	1	1	1	3.51679	2
514043	P48507	Glutamate--cysteine ligase regulatory subunit (EC 6.3.2.2) (Gamma-glutamylcysteine synthetase) (Gamma-ECS) (GCS light chain) (Glutamate--cysteine ligase modifier subunit) - Homo sapiens (Human)	GSH0_HUMAN	N	0.179929	1	5.40817	0.29084	3.62555	0.496383	0.223995	0.291225	0.217528	0.25055	2
518760	Q9H2H8	Peptidyl-prolyl cis-trans isomerase-like 3 (EC 5.2.1.8) (PPIase) (Rotamase) (Cyclophilin-like protein PPIL3) (Cyclophilin J) (CyPJ) - Homo sapiens (Human)	PPIL3_HUMAN	N	0.180424	1	1	1	1	1	3.32204	1	1	7.03359	2
515249	Q9UHI5	Large neutral amino acids transporter small subunit 2 (L-type amino acid transporter 2) (hLAT2) - Homo sapiens (Human)	LAT2_HUMAN	Y	0.181249	1	1	1	6.48502	1	3.02769	1	1	1	2
521517	Q13445	Transmembrane emp24 domain-containing protein 1 precursor (Interleukin-1 receptor-like 1 ligand) (Putative T1/ST2 receptor-binding protein) - Homo sapiens (Human)	TMED1_HUMAN	Y	0.181685	0.0756757	0.439326	0.320887	0.826753	8.48212	3.17486	1	0.08854	1	2
509634	Q13867	Bleomycin hydrolase (EC 3.4.22.40) (BLM hydrolase) (BMH) (BH) - Homo sapiens (Human)	BLMH_HUMAN	N	0.181823	6.80538	0.941922	1.13605	1.54849	1.92017	5.64164	0.296981	1	0.8876	2
509544	Q9Y6D5	Brefeldin A-inhibited guanine nucleotide-exchange protein 2 (Brefeldin A-inhibited GEP 2) - Homo sapiens (Human)	BIG2_HUMAN	N	0.182017	0.526952	0.304594	0.214765	1.30791	4.24106	0.32976	0.751684	0.450555	3.79672	2
515534	Q6P1M3	Lethal(2) giant larvae protein homolog 2 (HGL) - Homo sapiens (Human)	L2GL2_HUMAN	N	0.184253	0.217355	0.0988372	0.29084	3.37019	0.85636	0.123998	0.34289	0.798196	3.65676	2
512907	Q7Z6J4	FYVE, RhoGEF and PH domain-containing protein 2 (Zinc finger FYVE domain-containing protein 4) - Homo sapiens (Human)	FGD2_HUMAN	N	0.184962	1	1	1	14.5022	6.43303	1	1	1	1	2
511391	P61201	COP9 signalosome complex subunit 2 (Signalosome subunit 2) (SGN2) (JAB1-containing signalosome subunit 2) (Thyroid receptor-interacting protein 15) (Alien homolog) - Homo sapiens (Human)	CSN2_HUMAN	N	0.186368	0.1573	0.248869	0.987507	2.27022	0.980479	3.02769	0.411636	0.649775	0.916201	2
513056	O75044	SLIT-ROBO Rho GTPase-activating protein 2 (srGAP2) (Formin-binding protein 2) - Homo sapiens (Human)	FNBP2_HUMAN	N	0.187189	1	1	1	1	1	3.02769	1	1	7.03359	2
520954	Q15022	Polycomb protein SUZ12 (Suppressor of zeste 12 protein homolog) (Joined to JAZF1 protein) (Chromatin precipitated E2F target 9 protein) (ChET 9 protein) - Homo sapiens (Human)	SUZ12_HUMAN	N	0.18831	1	1.57558	3.99672	1	4.24106	1	1	1	1	2
519882	O00422	Histone deacetylase complex subunit SAP18 (Sin3-associated polypeptide, 18 kDa) (Sin3-associated polypeptide p18) (2HOR0202) - Homo sapiens (Human)	SAP18_HUMAN	N	0.188644	1.55888	0.0500822	3.48722	0.0726968	0.0900611	1.42231	0.0655639	0.546213	2.34274	2
510861	Q92478	C-type lectin domain family 2 member B (C-type lectin superfamily member 2) (Activation-induced C-type lectin) (IFN-alpha2b-inducing-related protein 1) (C-type lectin domain family 2 member B) - Homo sapiens (Human)	CLC2B_HUMAN	Y	0.190215	1	1	1	3.62555	8.76789	1	1	1	1	2
517038	P49279	Natural resistance-associated macrophage protein 1 (NRAMP 1) - Homo sapiens (Human)	NRAM1_HUMAN	Y	0.190215	1	1	1	3.62555	8.76789	1	1	1	1	2
522582	Q9Y5J1	U3 small nucleolar RNA-associated protein 18 homolog (WD repeat protein 50) - Homo sapiens (Human)	UTP18_HUMAN	N	0.190243	0.311776	0.148256	0.214765	0.826753	4.38395	0.323532	0.120218	0.627201	7.31352	2
516333	P16455	Methylated-DNA--protein-cysteine methyltransferase (EC 2.1.1.63) (6-O-methylguanine-DNA methyltransferase) (MGMT) (O-6-methylguanine-DNA-alkyltransferase) - Homo sapiens (Human)	MGMT_HUMAN	N	0.192237	0.0734954	0.553718	1	2.40749	1	0.0732238	0.196692	1	3.65676	2
522368	P08670	Vimentin - Homo sapiens (Human)	VIME_HUMAN	N	0.192244	1.34637	1.50863	0.727177	0.851785	2.27618	1.54491	2.46747	1.89662	1.17816	2
519817	Q6P1M0	Long-chain fatty acid transport protein 4 (EC 6.2.1.-) (Fatty acid transport protein 4) (FATP-4) (Solute carrier family 27 member 4) - Homo sapiens (Human)	S27A4_HUMAN	Y	0.192332	1	9.78258	1	1	1	1	1	3.93434	1	2
510612	Q8WUX9	Protein CHMP7 - Homo sapiens (Human)	CHMP7_HUMAN	N	0.192772	1	1	1.16241	1	8.76789	1.94602	0.30297	7.60373	1	2
521030	Q13190	Syntaxin-5 - Homo sapiens (Human)	STX5_HUMAN	Y	0.192963	0.739592	0.32212	0.0867086	1.92462	4.38395	3.02769	0.30297	0.30533	0.25055	2
521472	Q13641	Trophoblast glycoprotein precursor (5T4 oncofetal trophoblast glycoprotein) (5T4 oncotrophoblast glycoprotein) (5T4 oncofetal antigen) (M6P1) - Homo sapiens (Human)	TPBG_HUMAN	Y	0.19435	4.79812	0.0535244	0.214765	1	1	0.187427	0.291225	3.93434	1	2
515509	P16150	Leukosialin precursor (Leukocyte sialoglycoprotein) (Sialophorin) (Galactoglycoprotein) (GALGP) (CD43 antigen) - Homo sapiens (Human)	LEUK_HUMAN	Y	0.194762	1	1	7.99345	3.11483	1	1	1	1	1	2
521991	Q15628	Tumor necrosis factor receptor type 1-associated DEATH domain protein (TNFR1-associated DEATH domain protein) (TNFRSF1A-associated via death domain) - Homo sapiens (Human)	TRADD_HUMAN	N	0.194901	1	1	1	1.81492	6.50448	1	1	1	3.79672	2
511754	P59665	Neutrophil defensin 1 precursor (HNP-1) (HP-1) (HP1) (Defensin, alpha 1) [Contains: HP 1-56; Neutrophil defensin 2 (HNP-2) (HP-2) (HP2)] - Homo sapiens (Human)	DEF1_HUMAN	N	0.195646	0.985811	5.53549	0.787121	0.410381	0.200281	0.969528	0.387082	0.230564	2.0084	2
511755	P59666	Neutrophil defensin 3 precursor (HNP-3) (HP-3) (HP3) (Defensin, alpha 3) [Contains: HP 3-56; Neutrophil defensin 2 (HNP-2) (HP-2) (HP2)] - Homo sapiens (Human)	DEF3_HUMAN	N	0.195646	0.985811	5.53549	0.787121	0.410381	0.200281	0.969528	0.387082	0.230564	2.0084	2
508395	P30457	HLA class I histocompatibility antigen, A-66 alpha chain precursor (MHC class I antigen A*66) (Aw-66) (A-10) - Homo sapiens (Human)	1A66_HUMAN	Y	0.19568	1.61644	4.64735	1.44749	0.861871	0.963141	0.872077	2.19525	1.43488	0.781582	2
508358	P18462	HLA class I histocompatibility antigen, A-25 alpha chain precursor (MHC class I antigen A*25) (A-10) - Homo sapiens (Human)	1A25_HUMAN	Y	0.195863	1.61644	4.64735	1.44749	0.861871	0.950548	0.872077	2.22815	1.43488	0.781582	2
508359	P30450	HLA class I histocompatibility antigen, A-26 alpha chain precursor (MHC class I antigen A*26) - Homo sapiens (Human)	1A26_HUMAN	Y	0.195863	1.61644	4.64735	1.44749	0.861871	0.950548	0.872077	2.22815	1.43488	0.781582	2
520196	Q8NBJ9	SID1 transmembrane family member 2 precursor - Homo sapiens (Human)	SIDT2_HUMAN	Y	0.198658	1	9.78258	1	3.62555	1	1	1	1	1	2
512855	P37268	Squalene synthetase (EC 2.5.1.21) (SQS) (SS) (Farnesyl-diphosphate farnesyltransferase) (FPP:FPP farnesyltransferase) - Homo sapiens (Human)	FDFT_HUMAN	N	0.199077	1	10.2995	1	1	1	1	1	1	3.79672	2
514013	Q04756	Hepatocyte growth factor activator precursor (EC 3.4.21.-) (HGF activator) (HGFA) [Contains: Hepatocyte growth factor activator short chain; Hepatocyte growth factor activator long chain] - Homo sapiens (Human)	HGFA_HUMAN	Y	0.201041	1	9.78258	1	1	1	1	1	1	3.51679	2
520001	P35542	Serum amyloid A-4 protein precursor (Constitutively expressed serum amyloid A protein) (C-SAA) - Homo sapiens (Human)	SAA4_HUMAN	N	0.201041	1	9.78258	1	1	1	1	1	1	3.51679	2
515891	O60341	Lysine-specific histone demethylase 1 (EC 1.-.-.-) (Flavin-containing amine oxidase domain-containing protein 2) (BRAF35-HDAC complex protein BHC110) - Homo sapiens (Human)	LSD1_HUMAN	N	0.201607	0.576846	1.45032	2.13475	2.47329	0.42818	0.110368	0.885273	0.138107	0.863231	2
508439	Q95604	HLA class I histocompatibility antigen, Cw-17 alpha chain precursor (MHC class I antigen Cw*17) - Homo sapiens (Human)	1C17_HUMAN	Y	0.202613	1.87743	4.70326	1.54399	1.28051	0.999196	0.887473	1.37685	3.66089	0.614512	2
509172	O14617	AP-3 complex subunit delta-1 (Adapter-related protein complex 3 subunit delta-1) (Delta-adaptin 3) (AP-3 complex subunit delta) (Delta-adaptin) - Homo sapiens (Human)	AP3D1_HUMAN	N	0.202879	0.739592	6.30233	1.87146	1.79572	1.27058	1.32	2.36359	0.395977	1.68555	2
508786	Q9Y6U3	Adseverin (Scinderin) - Homo sapiens (Human)	ADSV_HUMAN	N	0.204597	1	1	1	4.2077	1	71.8024	1	1	1	2
521067	P51809	Synaptobrevin-like protein 1 (Tetanus insensitive VAMP) (Ti-VAMP) (Ti-VAMP/VAMP7) - Homo sapiens (Human)	SYBL1_HUMAN	Y	0.205519	1	9.78258	1	1	1	3.32204	1	1	1	2
521779	Q99816	Tumor susceptibility gene 101 protein - Homo sapiens (Human)	TS101_HUMAN	N	0.20751	0.999569	0.697439	7.99345	1.31723	5.08234	1.92286	0.668699	1.00418	1.23807	2
517813	Q9BUL8	Programmed cell death protein 10 (TF-1 cell apoptosis-related protein 15) (Cerebral cavernous malformations 3 protein) - Homo sapiens (Human)	PDC10_HUMAN	N	0.209606	0.977187	1.25742	2.04146	2.61026	0.561603	0.673934	0.38855	0.138993	0.16025	2
519495	Q9HAU5	Regulator of nonsense transcripts 2 (Nonsense mRNA reducing factor 2) (Up-frameshift suppressor 2 homolog) (hUpf2) - Homo sapiens (Human)	RENT2_HUMAN	N	0.210346	0.217355	0.296512	1	3.11483	1	3.32204	0.30297	0.15697	1	2
512837	Q9H0Q0	Protein FAM49A - Homo sapiens (Human)	FA49A_HUMAN	N	0.210565	1.26104	0.296512	6.6416	1.58238	12.9375	0.711154	1.44903	1	1	2
508612	P45954	Short/branched chain specific acyl-CoA dehydrogenase, mitochondrial precursor (EC 1.3.99.-) (SBCAD) (2-methyl branched chain acyl-CoA dehydrogenase) (2-MEBCAD) (2-methylbutyryl-coenzyme A dehydrogenase) (2-methylbutyryl-CoA dehydrogena	ACDSB_HUMAN	N	0.212845	0.85989	0.0453399	0.438085	0.290852	0.576149	3.71961	1.05952	2.82468	0.843586	2
516890	P56556	NADH dehydrogenase [ubiquinone] 1 alpha subcomplex subunit 6 (EC 1.6.5.3) (EC 1.6.99.3) (NADH-ubiquinone oxidoreductase B14 subunit) (Complex I-B14) (CI-B14) - Homo sapiens (Human)	NDUA6_HUMAN	N	0.21418	0.188336	0.0641904	2.96252	1.73658	0.635292	0.421655	0.646796	5.76904	0.621242	2
518948	P29373	Cellular retinoic acid-binding protein 2 (Cellular retinoic acid-binding protein II) (CRABP-II) (Retinoic acid-binding protein II, cellular) - Homo sapiens (Human)	RABP2_HUMAN	N	0.214247	0.891299	0.18517	0.450146	8.55316	2.3432	0.126174	0.352791	0.722377	0.554553	2
518966	P60763	Ras-related C3 botulinum toxin substrate 3 (p21-Rac3) - Homo sapiens (Human)	RAC3_HUMAN	N	0.215388	1.08605	2.80274	1.42708	1.47639	2.68136	1.03088	0.540449	1.07356	1.16902	2
514736	O15027	Protein KIAA0310 - Homo sapiens (Human)	K0310_HUMAN	N	0.216167	0.0734954	0.525194	2.70088	0.275584	6.43303	1.80404	0.567539	0.225278	0.881132	2
510080	P60033	CD81 antigen (26 kDa cell surface protein TAPA-1) (Target of the antiproliferative antibody 1) (Tetraspanin-28) (Tspan-28) - Homo sapiens (Human)	CD81_HUMAN	Y	0.216211	1.40793	1.38108	2.45265	1.70088	11.4213	1.48035	0.740329	0.49783	1.00338	2
510825	Q9NQ88	Protein C12orf5 - Homo sapiens (Human)	CL005_HUMAN	N	0.217758	1	1	1	6.48502	4.38395	1.35637	1	1	1	2
508394	P30456	HLA class I histocompatibility antigen, A-43 alpha chain precursor (MHC class I antigen A*43) (Aw-43) - Homo sapiens (Human)	1A43_HUMAN	Y	0.218911	1.58074	4.62202	1.37276	0.860272	0.939215	0.820376	2.22552	1.35124	0.791174	2
508365	P30453	HLA class I histocompatibility antigen, A-34 alpha chain precursor (MHC class I antigen A*34) (Aw-34) (A-10) - Homo sapiens (Human)	1A34_HUMAN	Y	0.220819	1.53477	4.7619	1.34912	0.872534	0.945629	0.855657	2.22122	1.43488	0.770656	2
514620	Q04637	Eukaryotic translation initiation factor 4 gamma 1 (eIF-4-gamma 1) (eIF-4G1) (eIF-4G 1) (p220) - Homo sapiens (Human)	IF4G1_HUMAN	N	0.220979	0.791443	0.214387	0.901819	2.54507	4.97069	1.23801	0.361708	0.495924	0.551589	2
516014	Q16626	Male-enhanced antigen 1 (MEA-1) - Homo sapiens (Human)	MEA1_HUMAN	N	0.222593	1	1.45032	1	3.37019	4.24106	1	1	1	1	2
511073	O15247	Chloride intracellular channel protein 2 (XAP121) - Homo sapiens (Human)	CLIC2_HUMAN	N	0.223475	1.47918	0.941922	1.35044	0.687845	15.1295	0.804326	3.18435	0.777426	1.0257	2
523231	Q9BS34	Zinc finger protein 670 - Homo sapiens (Human)	ZN670_HUMAN	N	0.22522	1	4.89129	1	3.37019	1	1	1.21794	1	1	2
515725	P01717	Ig lambda chain V-IV region Hil - Homo sapiens (Human)	LV4C_HUMAN	N	0.225996	1	15.7076	1	1	1	1	4.10105	1	1	2
522068	Q9Y3C1	UPF0384 protein CGI-117 (HBV pre-S2 trans-regulated protein 3) - Homo sapiens (Human)	U384_HUMAN	N	0.226317	1	0.0988372	0.173417	0.265425	1	0.371995	4.10105	0.905568	3.65676	2
518534	P16885	1-phosphatidylinositol-4,5-bisphosphate phosphodiesterase gamma 2 (EC 3.1.4.11) (Phosphoinositide phospholipase C) (PLC-gamma-2) (Phospholipase C-gamma-2) (PLC-IV) - Homo sapiens (Human)	PLCG2_HUMAN	N	0.226456	1	1	12.6367	10.8767	1	0.292895	1	1	1	2
522348	O75083	WD repeat protein 1 (Actin-interacting protein 1) (AIP1) (NORI-1) - Homo sapiens (Human)	WDR1_HUMAN	N	0.227265	1.36031	2.60301	1.71468	1.30237	3.66846	0.973855	1.42492	0.92035	0.862211	2
521792	O75648	tRNA (5-methylaminomethyl-2-thiouridylate)-methyltransferase (EC 2.1.1.61) (Mitochondrial tRNA-specific 2-thiouridylase 1) (MTO2 homolog) - Homo sapiens (Human)	TRMU_HUMAN	N	0.22932	1	1.57558	1	1	1	3.02769	1	1	3.51679	2
521557	Q9Y4G6	Talin-2 - Homo sapiens (Human)	TLN2_HUMAN	N	0.229437	0.881462	1.52695	5.49969	1.17082	1.77827	1.08948	1.27949	0.652979	4.03613	2
515230	O43526	Potassium voltage-gated channel subfamily KQT member 2 (Voltage-gated potassium channel subunit Kv7.2) (Neuroblastoma-specific potassium channel subunit alpha KvLQT2) (KQT-like 2) - Homo sapiens (Human)	KCNQ2_HUMAN	Y	0.231796	0.784134	0.113205	0.493754	0.104902	1.71272	0.251456	3.34851	3.93434	0.198722	2
519931	Q9Y6M7	Sodium bicarbonate cotransporter 3 (Sodium bicarbonate cotransporter 2) (Sodium bicarbonate cotransporter 2b) (Bicarbonate transporter) (Solute carrier family 4 member 7) - Homo sapiens (Human)	S4A7_HUMAN	Y	0.232114	1	1	1	1	4.38395	0.973008	4.4419	1	1	2
517213	Q9NPE3	H/ACA ribonucleoprotein complex subunit 3 (Nucleolar protein family A member 3) (snoRNP protein NOP10) - Homo sapiens (Human)	NOLA3_HUMAN	N	0.232602	0.879268	0.217266	0.214765	0.447266	4.3125	0.625299	0.14312	0.652979	2.99208	2
523268	Q8IWY8	Zinc finger protein 690 - Homo sapiens (Human)	ZN690_HUMAN	N	0.232716	1	1	1	1.23335	4.3125	1	4.78274	1	1	2
512582	Q01780	Exosome component 10 (Polymyositis/scleroderma autoantigen 2) (Autoantigen PM/Scl 2) (Polymyositis/scleroderma autoantigen 100 kDa) (PM/Scl-100) (P100 polymyositis-scleroderma overlap syndrome-associated autoantigen) - Homo sapiens (Hu	EXOSX_HUMAN	N	0.232788	0.108677	0.671758	3.99672	0.779626	1	3.17486	0.199301	0.282945	1	2
521145	Q92759	TFIIH basal transcription factor complex p52 subunit (Basic transcription factor 52 kDa subunit) (BTF2-p52) (General transcription factor IIH polypeptide 4) - Homo sapiens (Human)	TF2H4_HUMAN	N	0.234249	0.108677	1	3.99672	0.458563	1	0.421655	0.10099	0.196067	2.20283	2
519739	P52434	DNA-directed RNA polymerases I, II, and III 17.1 kDa polypeptide (EC 2.7.7.6) (RPB17) (RPB8) (RPABC3) - Homo sapiens (Human)	RPB8_HUMAN	N	0.234949	1.47918	4.89129	1	16.5956	1.23839	0.768587	1	1	0.916201	2
518979	Q9Y2P8	RNA 3'-terminal phosphate cyclase-like protein - Homo sapiens (Human)	RCL1_HUMAN	N	0.235858	0.217355	1	1	3.37019	1	0.0928706	0.291225	0.399098	3.79672	2
522429	Q9BV40	Vesicle-associated membrane protein 8 (VAMP-8) (Endobrevin) (EDB) - Homo sapiens (Human)	VAMP8_HUMAN	Y	0.236669	1.78258	4.86681	1.06504	0.824795	2.3201	0.604461	1.3217	0.550159	0.977012	2
508435	P30508	HLA class I histocompatibility antigen, Cw-12 alpha chain precursor (MHC class I antigen Cw*12) - Homo sapiens (Human)	1C12_HUMAN	Y	0.237251	1.57486	4.88965	1.29448	1.14746	1.02392	0.792331	1.43811	4.80743	0.811634	2
513882	Q92839	Hyaluronan synthase 1 (EC 2.4.1.212) (Hyaluronate synthase 1) (Hyaluronic acid synthase 1) (HA synthase 1) (HuHAS1) - Homo sapiens (Human)	HAS1_HUMAN	Y	0.237313	2.42544	0.116748	3.99672	0.962312	0.167104	0.253853	0.30297	1	0.233781	2
516411	Q14149	MORC family CW-type zinc finger protein 3 (Zinc finger CW-type coiled-coil domain protein 3) - Homo sapiens (Human)	MORC3_HUMAN	N	0.239321	1	1.57558	1.16241	3.62555	1	1	1	1	3.51679	2
516787	P18615	Negative elongation factor E (NELF-E) (RD protein) - Homo sapiens (Human)	NELFE_HUMAN	N	0.240745	4.10041	0.0741279	1	2.07204	1	0.475193	0.724514	0.702581	0.324604	2
518435	Q99959	Plakophilin-2 - Homo sapiens (Human)	PKP2_HUMAN	N	0.242534	2.42544	0.125268	1.26388	1.30928	0.223126	0.292895	3.7629	1.39553	0.1527	2
519873	Q8TB61	Adenosine 3'-phospho 5'-phosphosulfate transporter 1 (PAPS transporter 1) (Solute carrier family 35 member B2) (Putative MAPK-activating protein PM15) (Putative NF-kappa-B-activating protein 48) - Homo sapiens (Human)	S35B2_HUMAN	Y	0.245449	0.2376	4.89129	0.29084	0.0745482	1	0.223995	4.10105	1	0.801251	2
522324	Q9NRR5	Ubiquilin-4 (Ataxin-1 ubiquitin-like-interacting protein A1U) - Homo sapiens (Human)	UBQL4_HUMAN	N	0.245916	2.56486	0.589503	0.29084	1	0.19534	1.2276	0.0855768	0.134758	3.65676	2
520030	Q12765	Secernin-1 - Homo sapiens (Human)	SCRN1_HUMAN	N	0.248472	3.12277	0.496601	1	1.62868	2.12005	1.55525	0.296981	1.90393	1.07322	2
510649	P32929	Cystathionine gamma-lyase (EC 4.4.1.1) (Gamma-cystathionase) - Homo sapiens (Human)	CGL_HUMAN	N	0.248727	1	1	1	1	1	22.0769	1	4.1993	1	2
519089	P42696	RNA-binding protein 34 (RNA-binding motif protein 34) - Homo sapiens (Human)	RBM34_HUMAN	N	0.249143	0.2376	0.203055	0.29084	2.75138	4.24106	0.366648	0.145613	0.695707	0.885543	2
508667	O14561	Acyl carrier protein, mitochondrial precursor (ACP) (NADH-ubiquinone oxidoreductase 9.6 kDa subunit) (CI-SDAP) - Homo sapiens (Human)	ACPM_HUMAN	N	0.252116	0.522756	0.203055	1.16241	1	0.19534	3.17486	0.291225	3.66939	0.431615	2
522011	Q9Y606	tRNA pseudouridine synthase A (EC 5.4.99.12) (tRNA-uridine isomerase I) (tRNA pseudouridylate synthase I) - Homo sapiens (Human)	TRUA_HUMAN	N	0.253366	0.217355	0.244967	3.99672	3.11483	0.579366	0.256196	0.36044	1.94933	1.33923	2
512265	Q8N8S7	Protein enabled homolog - Homo sapiens (Human)	ENAH_HUMAN	N	0.253669	0.377845	0.0382029	3.99672	1	1	9.08306	0.119264	0.437521	1.09713	2
514270	P05114	Nonhistone chromosomal protein HMG-14 (High-mobility group nucleosome-binding domain-containing protein 1) - Homo sapiens (Human)	HMGN1_HUMAN	N	0.25379	0.868635	1.21613	0.743137	1.45201	1.85759	0.869489	4.70363	5.32749	0.527569	2
509414	O43861	Probable phospholipid-transporting ATPase IIB (EC 3.6.3.1) - Homo sapiens (Human)	ATP9B_HUMAN	Y	0.258723	0.739592	0.274675	0.214765	0.250295	4.38395	0.177104	1	1	3.79672	2
521906	Q9BZY9	Tripartite motif-containing protein 31 - Homo sapiens (Human)	TRI31_HUMAN	N	0.259616	1.61696	0.296512	0.858356	3.62555	4.38395	0.490593	0.0533259	1.10919	0.15941	2
512340	P21860	Receptor tyrosine-protein kinase erbB-3 precursor (EC 2.7.10.1) (c-erbB3) (Tyrosine kinase-type cell surface receptor HER3) - Homo sapiens (Human)	ERBB3_HUMAN	Y	0.259735	1	1	7.99345	1	1	2.91903	1	1	1	2
513842	P17693	HLA class I histocompatibility antigen, alpha chain G precursor (HLA G antigen) - Homo sapiens (Human)	HLAG_HUMAN	Y	0.261829	0.865268	1.89235	0.958313	0.980751	3.81175	2.3032	1.12121	1	0.837129	2
515961	Q00266	S-adenosylmethionine synthetase isoform type-1 (EC 2.5.1.6) (Methionine adenosyltransferase 1) (AdoMet synthetase 1) (Methionine adenosyltransferase I/III) (MAT-I/III) - Homo sapiens (Human)	METK1_HUMAN	N	0.262509	1	1	1	0.265425	4.3125	3.32204	0.148491	0.216592	0.219115	2
508430	P30504	HLA class I histocompatibility antigen, Cw-4 alpha chain precursor (MHC class I antigen Cw*4) - Homo sapiens (Human)	1C04_HUMAN	Y	0.263283	1.23067	11.2622	1.23657	1.28915	0.798206	1.71969	1.89421	12.3329	0.648315	2
521290	Q86VP1	Tax1-binding protein 1 (TRAF6-binding protein) - Homo sapiens (Human)	TAXB1_HUMAN	N	0.263473	1	1.45032	0.29084	0.962312	1	1	1	8.3986	7.03359	2
520427	P51532	Probable global transcription activator SNF2L4 (EC 3.6.1.-) (ATP-dependent helicase SMARCA4) (SNF2-beta) (BRG-1 protein) (Mitotic growth and transcription activator) (Brahma protein homolog 1) (SWI/SNF-related matrix-associated actin-d	SMCA4_HUMAN	N	0.266763	0.149139	0.525194	1	3.09698	0.09767	0.126926	4.10105	0.126391	1.06306	2
518780	Q9Y570	Protein phosphatase methylesterase 1 (EC 3.1.1.-) (PME-1) - Homo sapiens (Human)	PPME1_HUMAN	N	0.267516	1.58057	0.448118	0.14542	4.9276	0.106282	0.869373	0.0537071	0.254466	2.16041	2
517650	Q96SU4	Oxysterol-binding protein-related protein 9 (OSBP-related protein 9) (ORP-9) - Homo sapiens (Human)	OSBL9_HUMAN	N	0.26851	0.217355	1	1.03135	0.223633	8.48212	0.732668	0.296981	0.0471431	2.3431	2
519180	P51157	Ras-related protein Rab-28 (Rab-26) - Homo sapiens (Human)	RAB28_HUMAN	N	0.268704	3.40269	0.16106	0.247079	0.257638	1	0.711154	1	0.530186	3.51679	2
521829	P02788	Lactotransferrin precursor (EC 3.4.21.-) (Lactoferrin) (Talalactoferrin alfa) [Contains: Kaliocin-1; Lactoferroxin A; Lactoferroxin B; Lactoferroxin C] - Homo sapiens (Human)	TRFL_HUMAN	N	0.269457	1.04504	3.82359	0.803045	0.436186	0.197496	6.18504	0.107882	0.530443	1.51846	2
511335	O14548	Cytochrome c oxidase subunit VIIa-related protein, mitochondrial precursor (COX7a-related protein) (EB1) - Homo sapiens (Human)	COX7R_HUMAN	Y	0.270427	0.47055	2.52558	1.30261	0.897241	0.881212	1.57454	1.35637	30.4349	1.07787	2
516214	P49006	MARCKS-related protein (MARCKS-like protein 1) (Macrophage myristoylated alanine-rich C kinase substrate) (Mac-MARCKS) (MacMARCKS) - Homo sapiens (Human)	MRP_HUMAN	N	0.2706	4.67943	0.0674014	8.26796	1.29473	1.46515	0.312543	0.796894	0.277297	0.367117	2
511162	Q92523	Carnitine O-palmitoyltransferase I, muscle isoform (EC 2.3.1.21) (CPT I) (CPTI-M) (Carnitine palmitoyltransferase 1B) (Carnitine palmitoyltransferase I-like protein) - Homo sapiens (Human)	CPT1B_HUMAN	Y	0.27225	1	0.274675	1	7.25111	1	1	1	11.803	1	2
514503	P01860	Ig gamma-3 chain C region (Heavy chain disease protein) (HDC) - Homo sapiens (Human)	IGHG3_HUMAN	N	0.273869	2.62732	4.42272	0.841401	1.31241	1.54377	1.39591	0.975343	0.282075	1.24509	2
509636	Q8WWM7	Ataxin-2-like protein (Ataxin-2 domain protein) (Ataxin-2-related protein) - Homo sapiens (Human)	ATX2L_HUMAN	N	0.274237	0.772503	0.0676851	4.64323	0.265425	1	2.03456	0.817342	0.659166	0.43562	2
512236	Q8NHS0	DnaJ homolog subfamily B member 8 - Homo sapiens (Human)	DNJB8_HUMAN	N	0.277441	0.2376	0.993203	3.99672	3.62555	0.19534	0.223995	1.19433	0.281925	0.822158	2
508436	P30510	HLA class I histocompatibility antigen, Cw-14 alpha chain precursor (MHC class I antigen Cw*14) - Homo sapiens (Human)	1C14_HUMAN	Y	0.278835	1.09532	10.3054	1.27364	1.04919	0.85514	1.98824	1.77867	12.3329	0.694998	2
517928	Q9HBI0	Gamma-parvin - Homo sapiens (Human)	PARVG_HUMAN	N	0.279684	1	1	6.6416	1.16944	8.55357	1	1	1	1	2
523058	Q9Y6M5	Zinc transporter 1 (ZnT-1) (Solute carrier family 30 member 1) - Homo sapiens (Human)	ZNT1_HUMAN	Y	0.281444	0.2376	0.16106	0.14542	0.868289	4.3125	0.759738	0.885273	1	3.51679	2
520575	O60493	Sorting nexin-3 (Protein SDP3) - Homo sapiens (Human)	SNX3_HUMAN	N	0.2825	0.522756	1.45032	1.80074	1.98467	19.442	0.705943	2.18934	1.10919	0.801251	2
515890	Q9H069	Leucine-rich repeat-containing protein 48 - Homo sapiens (Human)	LRC48_HUMAN	N	0.287907	1.64709	0.641434	1.25517	2.51449	0.366287	0.499048	1.81752	2.36798	1.34508	2
509491	Q9BXK5	Bcl-2-like 13 protein (Protein Mil1) (Bcl-rambo) - Homo sapiens (Human)	B2L13_HUMAN	Y	0.288705	0.0454054	2.17549	0.412968	0.779455	8.62501	0.375855	0.375842	0.99871	0.25055	2
508438	Q29960	HLA class I histocompatibility antigen, Cw-16 alpha chain precursor (MHC class I antigen Cw*16) - Homo sapiens (Human)	1C16_HUMAN	Y	0.288821	1.61349	5.51786	1.21583	1.26152	1.05504	0.726379	1.34933	4.80743	0.656356	2
522629	P46937	65 kDa Yes-associated protein (YAP65) - Homo sapiens (Human)	YAP1_HUMAN	N	0.289254	5.80175	0.0161316	1	0.962312	4.38395	0.170268	0.30297	0.782901	0.573704	2
516143	Q14566	DNA replication licensing factor MCM6 (p105MCM) - Homo sapiens (Human)	MCM6_HUMAN	N	0.291481	0.701112	0.821091	7.99345	3.82335	1	0.638353	0.203257	0.156416	0.647423	2
521633	Q9P0U1	Probable mitochondrial import receptor subunit TOM7 homolog (Translocase of outer membrane 7 kDa subunit homolog) - Homo sapiens (Human)	TOM7_HUMAN	Y	0.291518	3.40269	0.203055	1	0.389813	0.19534	0.0739374	1	4.1993	0.788525	2
520065	P78324	Tyrosine-protein phosphatase non-receptor type substrate 1 precursor (SHP substrate 1) (SHPS-1) (Inhibitory receptor SHPS-1) (Signal-regulatory protein alpha-1) (Sirp-alpha-1) (Sirp-alpha-2) (Sirp-alpha-3) (MyD-1 antigen) (Brain Ig-lik	SHPS1_HUMAN	Y	0.292673	1	1	23.9215	0.838162	6.43303	1	1.70802	1	0.385291	2
521502	Q9Y5L0	Transportin-3 (Transportin-SR) (TRN-SR) (Importin-12) - Homo sapiens (Human)	TNPO3_HUMAN	N	0.293071	0.306275	0.0726833	1.14725	3.76398	6.50448	0.441461	0.608968	0.652979	0.15941	2
509995	P16671	Platelet glycoprotein 4 (Platelet glycoprotein IV) (GPIV) (Glycoprotein IIIb) (GPIIIB) (Leukocyte differentiation antigen CD36) (CD36 antigen) (PAS IV) (PAS-4 protein) (Platelet collagen receptor) (Fatty acid translocase) (FAT) (Thrombo	CD36_HUMAN	Y	0.294744	1	1	1	0.843542	4.24106	1	4.10105	1	1	2
516561	Q9BXJ9	NMDA receptor-regulated protein 1 (N-terminal acetyltransferase) (Tubedown-1 protein) (Tbdn100) (Gastric cancer antigen Ga19) - Homo sapiens (Human)	NARG1_HUMAN	N	0.294787	1.83624	0.0410581	0.887249	2.30411	6.50448	0.638885	0.264879	0.410828	1.34657	2
515848	Q6UWE0	Ubiquitin ligase protein LRSAM1 (EC 6.3.2.-) (Leucine-rich repeat and sterile alpha motif-containing protein 1) (Tsg101-associated ligase) (hTAL) - Homo sapiens (Human)	LRSM1_HUMAN	N	0.297257	1	1	1	3.11483	1	1	1	1.03449	3.51679	2
516192	O15427	Monocarboxylate transporter 4 (MCT 4) (MCT 3) (Solute carrier family 16 member 3) - Homo sapiens (Human)	MOT4_HUMAN	Y	0.300364	0.464262	0.46343	0.581203	0.835394	10.817	0.393025	0.610128	0.281925	3.51679	2
510333	P14384	Carboxypeptidase M precursor (EC 3.4.17.12) (CPM) - Homo sapiens (Human)	CBPM_HUMAN	N	0.30267	1	9.78258	1	0.250295	6.50448	1.2276	1	1	1	2
515011	Q9Y597	BTB/POZ domain-containing protein KCTD3 (NY-REN-45 antigen) - Homo sapiens (Human)	KCTD3_HUMAN	N	0.305596	1	1	1	0.894533	4.24106	1	1	3.66939	1.66384	2
509442	O15511	Actin-related protein 2/3 complex subunit 5 (ARP2/3 complex 16 kDa subunit) (p16-ARC) - Homo sapiens (Human)	ARPC5_HUMAN	N	0.306579	0.778595	1.16527	2.25975	1.08364	2.99407	0.859463	0.893503	1.43594	0.865284	2
519796	Q96AT9	Ribulose-phosphate 3-epimerase (EC 5.1.3.1) (Ribulose-5-phosphate-3-epimerase) - Homo sapiens (Human)	RPE_HUMAN	N	0.306723	1.63084	1	1	1	1	3.32204	1	1	3.51679	2
522081	P15374	Ubiquitin carboxyl-terminal hydrolase isozyme L3 (EC 3.4.19.12) (UCH-L3) (Ubiquitin thioesterase L3) - Homo sapiens (Human)	UCHL3_HUMAN	N	0.308142	1.42931	0.725162	1.53847	2.47691	1.27058	2.76478	1	1.21928	0.884478	2
514426	P30740	Leukocyte elastase inhibitor (LEI) (Serpin B1) (Monocyte/neutrophil elastase inhibitor) (M/NEI) (EI) - Homo sapiens (Human)	ILEU_HUMAN	N	0.308598	1.32854	1.20015	1.25169	1.54341	3.61466	0.800972	6.31798	1.00139	0.879393	2
511918	P16989	DNA-binding protein A (Cold shock domain-containing protein A) (Single-strand DNA-binding protein NF-GMB) - Homo sapiens (Human)	DBPA_HUMAN	N	0.309303	6.08508	0.27521	0.575036	1.84089	2.87061	0.437752	0.502577	0.460232	0.731444	2
517031	P57740	Nuclear pore complex protein Nup107 (Nucleoporin Nup107) (107 kDa nucleoporin) - Homo sapiens (Human)	NU107_HUMAN	N	0.309862	4.10041	0.525194	0.997204	0.616677	0.0651133	4.68871	0.570409	0.188769	1.76766	2
521381	P05543	Thyroxine-binding globulin precursor (T4-binding globulin) (Serpin A7) - Homo sapiens (Human)	THBG_HUMAN	N	0.309942	1	8.37069	0.29084	0.265425	0.828449	0.678187	0.0432814	0.17708	5.41515	2
508570	O75027	ATP-binding cassette sub-family B member 7, mitochondrial precursor (ATP-binding cassette transporter 7) (ABC transporter 7 protein) - Homo sapiens (Human)	ABCB7_HUMAN	Y	0.31007	0.612551	0.725162	0.214765	0.265425	0.0688315	3.17486	1.34405	2.06898	1.79733	2
522442	Q9GZS3	WD repeat protein 61 (Meiotic recombination REC14 protein homolog) - Homo sapiens (Human)	WDR61_HUMAN	N	0.311525	0.930903	1.07816	4.26951	3.99151	1.17259	1.0985	1.21794	0.807311	1.23819	2
513268	O14908	PDZ domain-containing protein GIPC1 (RGS19-interacting protein 1) (GAIP C-terminus-interacting protein) (RGS-GAIP-interacting protein) (Tax interaction protein 2) (TIP-2) - Homo sapiens (Human)	GIPC1_HUMAN	N	0.312057	2.42544	0.0988372	0.626897	1.80237	6.50448	0.158048	0.550084	0.378193	0.916201	2
514430	P06213	Insulin receptor precursor (EC 2.7.10.1) (IR) (CD220 antigen) [Contains: Insulin receptor subunit alpha; Insulin receptor subunit beta] - Homo sapiens (Human)	INSR_HUMAN	Y	0.312523	0.2376	0.16106	3.99672	0.250295	1	0.253853	1.29359	1	3.51679	2
509029	O76027	Annexin A9 (Annexin-31) (Annexin XXXI) (Pemphaxin) - Homo sapiens (Human)	ANXA9_HUMAN	N	0.316187	1	1	4.64323	1	1	1	1	9.54016	1	2
518568	O60927	Protein phosphatase 1 regulatory subunit 11 (Protein phosphatase inhibitor 3) (Hemochromatosis candidate protein V) (HCG V) (HCG-V) - Homo sapiens (Human)	PP1RB_HUMAN	N	0.317239	1.54501	1	1	1	4.24106	1	1	3.66939	0.881132	2
516211	Q02750	Dual specificity mitogen-activated protein kinase kinase 1 (EC 2.7.12.2) (MAP kinase kinase 1) (MAPKK 1) (ERK activator kinase 1) (MAPK/ERK kinase 1) (MEK1) - Homo sapiens (Human)	MP2K1_HUMAN	N	0.317252	0.163014	1.11986	0.379737	1.5983	0.313615	0.836313	2.73955	1.057	2.49576	2
522303	Q13564	NEDD8-activating enzyme E1 regulatory subunit (Amyloid protein-binding protein 1) (Amyloid beta precursor protein-binding protein 1, 59 kDa) (APP-BP1) (Protooncogene protein 1) (HPP1) - Homo sapiens (Human)	ULA1_HUMAN	N	0.318223	0.80848	1	5.28975	6.74038	0.19534	0.281103	0.0989938	1.13178	0.440566	2
520632	Q13043	Serine/threonine-protein kinase 4 (EC 2.7.11.1) (STE20-like kinase MST1) (MST-1) (Mammalian STE20-like protein kinase 1) (Serine/threonine-protein kinase Krs-2) - Homo sapiens (Human)	STK4_HUMAN	N	0.319547	0.75141	1	25.2734	1.169	2.08508	1.05025	1.46732	0.17708	1	2
512157	Q9NY33	Dipeptidyl-peptidase 3 (EC 3.4.14.4) (Dipeptidyl-peptidase III) (DPP III) (Dipeptidyl aminopeptidase III) (Dipeptidyl arylamidase III) - Homo sapiens (Human)	DPP3_HUMAN	N	0.320104	1.06169	1.69333	0.797307	2.02531	3.02847	0.923353	0.726788	1.81445	0.713939	2
512093	Q9ULA0	Aspartyl aminopeptidase (EC 3.4.11.21) - Homo sapiens (Human)	DNPEP_HUMAN	N	0.321163	0.705231	3.81715	1.93164	3.7776	0.138268	0.496773	0.233267	1.2362	1.67426	2
520431	O43760	Synaptogyrin-2 (Cellugyrin) - Homo sapiens (Human)	SNG2_HUMAN	Y	0.323399	0.952086	0.671758	0.829711	2.20244	0.19534	1	2.38866	0.425283	0.28496	2
513840	P13747	HLA class I histocompatibility antigen, alpha chain E precursor (MHC class I antigen E) - Homo sapiens (Human)	HLAE_HUMAN	Y	0.32447	0.757475	3.71372	1.20356	0.717839	1.97491	2.0815	1.43379	1	0.736196	2
512518	Q9BXX0	EMILIN-2 precursor (Elastin microfibril interface-located protein 2) (Elastin microfibril interfacer 2) (Protein FOAP-10) - Homo sapiens (Human)	EMIL2_HUMAN	N	0.324568	1	1	1	0.779626	4.3125	1	1	1	3.51679	2
511614	O43169	Cytochrome b5 type B precursor (Cytochrome b5 outer mitochondrial membrane isoform) - Homo sapiens (Human)	CYB5B_HUMAN	Y	0.325321	0.234503	0.782157	1.58223	0.536297	0.236568	0.362758	1.65162	4.77425	2.30304	2
509817	Q96K17	Transcription factor BTF3 homolog 4 (Basic transcription factor 3-like 4) - Homo sapiens (Human)	BT3L4_HUMAN	N	0.325943	9.90216	0.144734	1.33434	0.455993	8.76789	0.274753	0.295091	1.7694	0.452256	2
519364	P10153	Nonsecretory ribonuclease precursor (EC 3.1.27.5) (Ribonuclease US) (Eosinophil-derived neurotoxin) (RNase UpI-2) (Ribonuclease 2) (RNase 2) - Homo sapiens (Human)	RNAS2_HUMAN	N	0.325964	1	1	133.361	0.401249	4.24106	1	1.31916	1	1	2
513969	Q9BUE6	HESB-like domain-containing protein 2, mitochondrial precursor (Iron sulfur assembly protein IscA) (hIscA) - Homo sapiens (Human)	HBLD2_HUMAN	N	0.328686	0.80848	1	1	1	1	6.20255	4.78274	1	0.822158	2
513862	Q8TDB8	Solute carrier family 2, facilitated glucose transporter member 14 (Glucose transporter type 14) - Homo sapiens (Human)	GTR14_HUMAN	Y	0.329036	1	1.57558	3.10326	1.55876	1	6.05538	1.00475	1	1	2
512189	Q7L591	Docking protein 3 (Downstream of tyrosine kinase 3) - Homo sapiens (Human)	DOK3_HUMAN	N	0.329071	1	5.92505	0.214765	1.94123	8.62501	1	1	1	1	2
515275	P18428	Lipopolysaccharide-binding protein precursor (LBP) - Homo sapiens (Human)	LBP_HUMAN	N	0.330006	1	150.912	1.53847	0.638338	1.05649	1.8167	6.49242	1	0.15941	2
518323	P11678	Eosinophil peroxidase precursor (EC 1.11.1.7) (EPO) [Contains: Eosinophil peroxidase light chain; Eosinophil peroxidase heavy chain] - Homo sapiens (Human)	PERE_HUMAN	N	0.331207	0.108677	1.62156	458.019	0.75059	0.19534	6.64408	0.199301	1	1	2
516698	P12036	Neurofilament triplet H protein (200 kDa neurofilament protein) (Neurofilament heavy polypeptide) (NF-H) - Homo sapiens (Human)	NFH_HUMAN	N	0.333498	1.09349	2.65341	1.05354	0.613379	1.1294	2.30306	1.87921	0.947159	1.2197	2
513499	P62993	Growth factor receptor-bound protein 2 (Adapter protein GRB2) (SH2/SH3 adapter GRB2) (Protein Ash) - Homo sapiens (Human)	GRB2_HUMAN	N	0.334007	1.67751	0.740719	4.02086	0.884014	18.4538	1.01483	1.17646	0.380786	1.27414	2
510775	P12111	Collagen alpha-3(VI) chain precursor - Homo sapiens (Human)	CO6A3_HUMAN	N	0.334166	1	0.580693	1	3.62555	0.0017975	1	1	1	3.65676	2
522551	Q8IWB7	WD repeat and FYVE domain-containing protein 1 (WD40- and FYVE domain-containing protein 1) (Phosphoinositide-binding protein 1) (FENS-1) (Zinc finger FYVE domain-containing protein 17) - Homo sapiens (Human)	WDFY1_HUMAN	N	0.334641	0.739592	3.15117	0.858356	1.36823	13.0804	1.09075	1.28609	0.517246	1.39184	2
520442	Q969G3	SWI/SNF-related matrix-associated actin-dependent regulator of chromatin subfamily E member 1 (BRG1-associated factor 57) - Homo sapiens (Human)	SMCE1_HUMAN	N	0.334644	0.246531	0.436926	2.61397	1.53704	4.38395	1.13189	0.149973	0.156897	1.47015	2
521138	Q15813	Tubulin-specific chaperone E (Tubulin-folding cofactor E) - Homo sapiens (Human)	TBCE_HUMAN	N	0.33488	1	0.0406111	1	3.11483	4.3125	1	0.296981	1	0.25055	2
512525	Q16610	Extracellular matrix protein 1 precursor (Secretory component p85) - Homo sapiens (Human)	ECM1_HUMAN	Y	0.335171	1	1	1	1	4.24106	9.08306	0.30297	1	1	2
516735	P07196	Neurofilament triplet L protein (68 kDa neurofilament protein) (Neurofilament light polypeptide) (NF-L) - Homo sapiens (Human)	NFL_HUMAN	N	0.335212	1.61696	1.14961	1.15177	0.556929	0.593672	2.38048	1.30103	2.137	1.77109	2
513291	P63218	Guanine nucleotide-binding protein G(I)/G(S)/G(O) gamma-5 subunit precursor - Homo sapiens (Human)	GBG5_HUMAN	N	0.335376	1.37274	12.0281	1.35044	1.55894	12.9375	0.223995	0.968088	0.093975	0.560612	2
516371	P05976	Myosin light chain 1, skeletal muscle isoform (MLC1F) (A1 catalytic) (Alkali myosin light chain 1) - Homo sapiens (Human)	MLE1_HUMAN	N	0.335685	1.70341	1.09214	1.18284	0.593287	5.88288	2.30306	1.2361	0.990801	0.501406	2
516372	P06741	Myosin light chain 3, skeletal muscle isoform (A2 catalytic) (Alkali myosin light chain 3) (MLC3F) - Homo sapiens (Human)	MLE3_HUMAN	N	0.335685	1.70341	1.09214	1.18284	0.593287	5.88288	2.30306	1.2361	0.990801	0.501406	2
516501	P08590	Myosin light polypeptide 3 (Myosin light chain 1, slow-twitch muscle B/ventricular isoform) (MLC1SB) (Ventricular/slow twitch myosin alkali light chain) (Cardiac myosin light chain-1) (CMLC1) - Homo sapiens (Human)	MYL3_HUMAN	N	0.335685	1.70341	1.09214	1.18284	0.593287	5.88288	2.30306	1.2361	0.990801	0.501406	2
510346	Q14004	Cell division cycle 2-like protein kinase 5 (EC 2.7.11.22) (CDC2-related protein kinase 5) (Cholinesterase-related cell division controller) - Homo sapiens (Human)	CD2L5_HUMAN	N	0.336707	0.217355	0.274675	1	0.265425	1	2.3032	0.672881	0.324888	3.51679	2
521388	Q99426	Tubulin-specific chaperone B (Tubulin folding cofactor B) (Cytoskeleton-associated protein 1) (Cytoskeleton-associated protein CKAPI) - Homo sapiens (Human)	TBCB_HUMAN	N	0.33673	0.989254	0.57975	2.21819	1.64313	2.22627	0.981015	0.980935	1.13175	1.52962	2
514680	O14879	Interferon-induced protein with tetratricopeptide repeats 3 (IFIT-3) (IFIT-4) (Interferon-induced 60 kDa protein) (IFI-60K) (ISG-60) (CIG49) (Retinoic acid-induced gene G protein) (RIG-G) - Homo sapiens (Human)	IFIT3_HUMAN	N	0.337188	0.1188	1	5.02569	1.98274	2.66036	1.77359	1.50378	1	0.25055	2
514851	Q96KM6	Zinc finger protein KIAA1196 - Homo sapiens (Human)	K1196_HUMAN	N	0.337811	1	0.120521	0.0959445	3.62555	1	0.973008	0.151485	1	7.17355	2
522206	Q8TBC4	NEDD8-activating enzyme E1 catalytic subunit (EC 6.3.2.-) (Ubiquitin-activating enzyme 3) (NEDD8-activating enzyme E1C) (Ubiquitin-activating enzyme E1C) - Homo sapiens (Human)	UBA3_HUMAN	N	0.337959	0.891244	0.104369	0.173417	8.55316	4.3125	0.637089	0.0394416	0.650381	1.74038	2
520393	P48595	Serpin B10 (Bomapin) (Protease inhibitor 10) - Homo sapiens (Human)	SPB10_HUMAN	N	0.33892	1	1	3.99672	0.687845	14.9866	1	1	1	1	2
517135	Q8WTT2	Nucleolar complex protein 3 homolog (NOC3 protein homolog) (NOC3-like protein) (Nucleolar complex-associated protein 3-like protein) (Factor for adipocyte differentiation 24) - Homo sapiens (Human)	NOC3L_HUMAN	N	0.339247	1	0.296512	1	3.37019	1	0.253853	0.0757425	0.393038	3.51679	2
519562	P49247	Ribose-5-phosphate isomerase (EC 5.3.1.6) (Phosphoriboisomerase) - Homo sapiens (Human)	RPIA_HUMAN	N	0.341587	3.40269	0.507722	1	1	0.09767	3.32204	0.149973	1	1	2
512065	P19525	Interferon-induced, double-stranded RNA-activated protein kinase (EC 2.7.11.1) (Interferon-inducible RNA-dependent protein kinase) (Protein kinase RNA-activated) (PKR) (p68 kinase) (P1/eIF-2A protein kinase) - Homo sapiens (Human)	E2AK2_HUMAN	N	0.342709	0.588311	0.878423	0.445493	3.09698	0.776777	1.13338	0.0540938	7.33878	0.25055	2
518132	Q96S52	GPI transamidase component PIG-S (Phosphatidylinositol-glycan biosynthesis class S protein) - Homo sapiens (Human)	PIGS_HUMAN	Y	0.343197	0.532797	0.0406111	0.383463	0.719228	0.09767	3.6217	0.476602	3.93434	1.32512	2
519382	P18077	60S ribosomal protein L35a - Homo sapiens (Human)	RL35A_HUMAN	N	0.343407	0.594245	0.697439	0.699254	3.00612	6.43303	0.0985327	1.20996	0.554595	1.16585	2
512592	P35555	Fibrillin-1 precursor - Homo sapiens (Human)	FBN1_HUMAN	N	0.343478	1	1	1	1	0.00310385	1	4.10105	1	3.51679	2
514479	O00505	Importin alpha-3 subunit (Karyopherin alpha-3 subunit) (SRP1-gamma) - Homo sapiens (Human)	IMA3_HUMAN	N	0.345428	0.739592	0.337187	1.30261	0.87457	4.3125	0.223995	9.22464	0.138993	0.6108	2
518210	P16284	Platelet endothelial cell adhesion molecule precursor (PECAM-1) (EndoCAM) (GPIIA') (CD31 antigen) - Homo sapiens (Human)	PECA1_HUMAN	Y	0.345675	1	0.87104	3.99672	1.70368	10.8884	0.292895	1.29359	1	1	2
522783	Q8IUH4	Probable palmitoyltransferase ZDHHC13 (EC 2.3.1.-) (Zinc finger DHHC domain-containing protein 13) (DHHC-13) (Huntingtin-interacting protein 14-related protein) (HIP14-related protein) (Huntingtin-interacting protein HIP3RP) (Putative	ZDH13_HUMAN	Y	0.345681	9.59624	9.78258	0.247079	1	1	1	1	0.743612	1	2
520039	O95487	Protein transport protein Sec24B (SEC24-related protein B) - Homo sapiens (Human)	SC24B_HUMAN	N	0.347371	0.188165	0.282372	1.64103	0.726628	25.8036	2.41784	0.830319	0.219546	1.09653	2
519649	Q9UDP3	Putative S100 calcium-binding protein H_NH0456N16.1 - Homo sapiens (Human)	S11Y_HUMAN	N	0.348518	0.860545	0.826527	0.881547	2.09917	1.74173	1.25482	1.30365	4.25095	1.38633	2
519621	Q9Y399	Mitochondrial 28S ribosomal protein S2 (S2mt) (MRP-S2) - Homo sapiens (Human)	RT02_HUMAN	N	0.348828	1	1	1	1	1	1	0.296981	3.66939	10.5504	2
519661	Q9NVS2	28S ribosomal protein S18a, mitochondrial precursor (MRP-S18-a) (Mrps18a) (MRP-S18-3) - Homo sapiens (Human)	RT18A_HUMAN	N	0.350017	0.715588	1	1	1	1	0.74412	4.10105	1	14.627	2
511737	Q96LJ7	Dehydrogenase/reductase SDR family member 1 (EC 1.1.-.-) - Homo sapiens (Human)	DHRS1_HUMAN	N	0.350906	0.325666	5.92505	0.573623	0.206688	0.046778	0.843485	4.4419	1.05412	0.885543	2
520426	P51531	Probable global transcription activator SNF2L2 (EC 3.6.1.-) (ATP-dependent helicase SMARCA2) (SNF2-alpha) (SWI/SNF-related matrix-associated actin-dependent regulator of chromatin subfamily A member 2) (hBRM) - Homo sapiens (Human)	SMCA2_HUMAN	N	0.352961	0.227027	1.57558	3.99672	1.73658	4.38395	1	1	0.0848506	0.347959	2
520937	Q96GW9	Methionyl-tRNA synthetase, mitochondrial precursor (EC 6.1.1.10) (Methionine--tRNA ligase 2) (Mitochondrial methionine--tRNA ligase) (MtMetRS) - Homo sapiens (Human)	SYMM_HUMAN	N	0.353507	0.227027	0.154393	4.64323	0.250295	8.48212	0.443397	0.483009	1.29955	0.233781	2
516866	Q9GZU8	NEFA-interacting nuclear protein NIP30 - Homo sapiens (Human)	NIP30_HUMAN	N	0.354509	7.5031	0.0988372	3.99672	0.779626	1	0.135637	1	1	0.25055	2
516609	P01871	Ig mu chain C region - Homo sapiens (Human)	MUC_HUMAN	N	0.354838	2.59338	31.8184	0.868035	1.97958	1.0302	0.249924	0.196692	0.217528	1.99159	2
521891	O14817	Tetraspanin-4 (Tspan-4) (Transmembrane 4 superfamily member 7) (Novel antigen 2) (NAG-2) - Homo sapiens (Human)	TSN4_HUMAN	Y	0.355499	1	1	3.99672	1	0.828449	1	4.78274	1	1	2
522159	Q03405	Urokinase plasminogen activator surface receptor precursor (uPAR) (U-PAR) (Monocyte activation antigen Mo3) (CD87 antigen) - Homo sapiens (Human)	UPAR_HUMAN	N	0.355793	1	4.89129	1.93164	0.265425	1	1	4.78274	1	1	2
518411	Q16513	Serine/threonine-protein kinase N2 (EC 2.7.11.13) (Protein kinase C-like 2) (Protein-kinase C-related kinase 2) - Homo sapiens (Human)	PKN2_HUMAN	N	0.356625	1	0.16106	1	3.11483	1	0.711154	0.296981	0.217528	3.65676	2
522414	Q9BQB6	Vitamin K epoxide reductase complex subunit 1 (EC 1.1.4.1) (Vitamin K1 2,3-epoxide reductase subunit 1) - Homo sapiens (Human)	VKOR1_HUMAN	Y	0.357353	1.86181	3.51369	0.573623	0.540282	0.752936	0.711154	1.36188	3.19278	1.01372	2
510129	P04040	Catalase (EC 1.11.1.6) - Homo sapiens (Human)	CATA_HUMAN	N	0.358149	0.76519	7.10001	1.26689	0.900228	0.712545	4.90042	1.99228	0.758411	1.04337	2
516334	Q96A72	Protein mago nashi homolog 2 - Homo sapiens (Human)	MGN2_HUMAN	N	0.359249	2.08966	0.0401736	1.14837	3.56181	1.7381	0.280062	0.541701	0.328761	0.805845	2
516335	P61326	Protein mago nashi homolog - Homo sapiens (Human)	MGN_HUMAN	N	0.359249	2.08966	0.0401736	1.14837	3.56181	1.7381	0.280062	0.541701	0.328761	0.805845	2
517168	P80303	Nucleobindin-2 precursor (DNA-binding protein NEFA) (Gastric cancer antigen Zg4) - Homo sapiens (Human)	NUCB2_HUMAN	Y	0.361422	0.571552	0.136985	0.82526	0.579695	1.44127	14.2133	2.11129	1	1.04406	2
516655	Q86U44	N6-adenosine-methyltransferase 70 kDa subunit (EC 2.1.1.62) (MT-A70) (Methyltransferase-like protein 3) - Homo sapiens (Human)	MTA70_HUMAN	N	0.362573	1.98427	0.274675	3.44174	1.16915	1.25663	1.12441	2.41993	0.575986	0.427439	2
518316	P78356	Phosphatidylinositol-4-phosphate 5-kinase type-2 beta (EC 2.7.1.68) (Phosphatidylinositol-4-phosphate 5-kinase type II beta) (1-phosphatidylinositol-4-phosphate 5-kinase 2-beta) (PtdIns(4)P-5-kinase isoform 2-beta) (PIP5KII-beta) (Diph	PI52B_HUMAN	N	0.362945	1	1.57558	10.5795	1.1516	0.85636	0.929902	0.291225	1	3.79672	2
522184	Q15819	Ubiquitin-conjugating enzyme E2 variant 2 (MMS2) (Enterocyte differentiation-associated factor EDAF-1) (Enterocyte differentiation-promoting factor) (EDPF-1) (Vitamin D3-inducible protein) (DDVit 1) - Homo sapiens (Human)	UB2V2_HUMAN	N	0.362977	2.3676	0.0292353	0.918413	1.7733	2.52372	0.896672	0.0589304	0.493851	0.650693	2
508364	P16190	HLA class I histocompatibility antigen, A-33 alpha chain precursor (MHC class I antigen A*33) (Aw-33) (Aw-19) - Homo sapiens (Human)	1A33_HUMAN	Y	0.363335	1.63808	4.51318	1.25796	0.699345	0.932503	0.720872	2.01064	1.33916	0.711074	2
510035	Q9HC52	Chromobox protein homolog 8 (Polycomb 3 homolog) (Pc3) (hPc3) (Rectachrome 1) - Homo sapiens (Human)	CBX8_HUMAN	N	0.363957	1	0.32212	1	1	1	1	1	3.66939	7.03359	2
521899	Q56UQ5	TPT1-like protein - Homo sapiens (Human)	TPT1L_HUMAN	N	0.364226	1.20822	0.735618	0.720296	1.17254	21.5625	0.945537	1.61566	2.38712	0.942854	2
510181	Q96NB3	Coiled-coil domain-containing protein 16 - Homo sapiens (Human)	CCD16_HUMAN	N	0.364429	1	1	3.99672	1	1	1	1	1	3.28863	2
511694	Q13619	Cullin-4A (CUL-4A) - Homo sapiens (Human)	CUL4A_HUMAN	N	0.365361	0.386252	1.60358	1.16241	2.14081	0.19534	0.886795	0.603008	0.276488	2.15356	2
516962	O00217	NADH dehydrogenase [ubiquinone] iron-sulfur protein 8, mitochondrial precursor (EC 1.6.5.3) (EC 1.6.99.3) (NADH-ubiquinone oxidoreductase 23 kDa subunit) (Complex I-23kD) (CI-23kD) (TYKY subunit) - Homo sapiens (Human)	NDUS8_HUMAN	N	0.365659	0.369076	0.53361	0.575883	0.730333	0.392503	3.763	0.57877	2.36805	0.906924	2
518114	Q92521	GPI mannosyltransferase 3 (EC 2.4.1.-) (GPI mannosyltransferase III) (GPI-MT-III) (Phosphatidylinositol-glycan biosynthesis class B protein) (PIG-B) - Homo sapiens (Human)	PIGB_HUMAN	Y	0.3664	1	1	7.99345	1	1	1	0.30297	3.66939	1	2
513990	P07686	Beta-hexosaminidase beta chain precursor (EC 3.2.1.52) (N-acetyl-beta-glucosaminidase) (Beta-N-acetylhexosaminidase) (Hexosaminidase B) (Cervical cancer proto-oncogene 7) (HCC-7) [Contains: Beta-hexosaminidase beta-B chain; Beta-hexosam	HEXB_HUMAN	Y	0.366886	0.649504	1.2585	0.712296	0.794841	5.32859	0.756243	3.22646	1.45288	1.78023	2
511124	P49747	Cartilage oligomeric matrix protein precursor (COMP) - Homo sapiens (Human)	COMP_HUMAN	N	0.367252	1	9.78258	1	0.250295	4.38395	1	1	1	1	2
511469	Q6NSI4	Uncharacterized protein CXorf57 - Homo sapiens (Human)	CX057_HUMAN	N	0.368168	2.42544	2.68703	0.173417	0.899011	1	0.253853	0.147038	0.122788	0.881132	2
516455	Q99417	C-Myc-binding protein (Associate of Myc 1) (AMY-1) - Homo sapiens (Human)	MYCBP_HUMAN	N	0.370798	0.507475	0.0988372	0.547	6.74038	6.43303	0.929902	1.22601	0.912355	0.0797051	2
508919	Q92888	Rho guanine nucleotide exchange factor 1 (p115-RhoGEF) (p115RhoGEF) (115 kDa guanine nucleotide exchange factor) (Sub1.5) - Homo sapiens (Human)	ARHG1_HUMAN	N	0.370878	1	4.89129	9.93298	1.32182	1.73408	1.05025	1.31916	0.565891	0.916201	2
518229	P98160	Basement membrane-specific heparan sulfate proteoglycan core protein precursor (HSPG) (Perlecan) (PLC) - Homo sapiens (Human)	PGBM_HUMAN	N	0.371961	1	0.296512	1	1.22399	0.0108397	30.0099	0.291225	0.12054	5.03349	2
509879	Q96IY1	Protein C1orf48 - Homo sapiens (Human)	CA048_HUMAN	N	0.37332	1	1	3.99672	1	1	1	1	3.66939	0.770582	2
521150	Q96J01	THO complex subunit 3 (Tho3) (TEX1 homolog) - Homo sapiens (Human)	THOC3_HUMAN	N	0.375854	3.40269	0.32212	1	0.265425	1	6.05538	0.291225	1	0.0974246	2
515660	P18054	Arachidonate 12-lipoxygenase, 12S-type (EC 1.13.11.31) (12-LOX) (Platelet-type lipoxygenase 12) - Homo sapiens (Human)	LOX12_HUMAN	N	0.376326	4.79812	0.87104	1.35044	0.826753	1	1	4.78274	1	1	2
512213	P25686	DnaJ homolog subfamily B member 2 (Heat shock 40 kDa protein 3) (DnaJ protein homolog 1) (HSJ-1) - Homo sapiens (Human)	DNJB2_HUMAN	N	0.376413	0.227027	1.51036	3.99672	3.62555	0.117042	0.111997	1.21794	0.777426	0.822158	2
511615	O14936	Peripheral plasma membrane protein CASK (EC 2.7.11.1) (hCASK) (Calcium/calmodulin-dependent serine protein kinase) (Lin-2 homolog) - Homo sapiens (Human)	CSKP_HUMAN	N	0.377149	1	0.32212	1	2.46671	0.19534	0.255544	0.151485	1	3.65676	2
522697	Q9UIA9	Exportin-7 (Exp7) (Ran-binding protein 16) - Homo sapiens (Human)	XPO7_HUMAN	N	0.377774	0.663559	0.525194	1	3.62555	4.24106	0.863499	0.402416	0.178862	1.21193	2
518189	Q15121	Astrocytic phosphoprotein PEA-15 (Phosphoprotein enriched in diabetes) (PED) - Homo sapiens (Human)	PEA15_HUMAN	N	0.377949	1.10705	0.81945	0.528647	3.21122	51.75	0.677943	0.913452	1.04253	1.37995	2
517113	P35658	Nuclear pore complex protein Nup214 (Nucleoporin Nup214) (214 kDa nucleoporin) (CAN protein) - Homo sapiens (Human)	NU214_HUMAN	N	0.378218	0.217355	0.489078	3.99672	1.81492	4.3125	0.805948	0.448587	0.237744	0.982343	2
508428	P30501	HLA class I histocompatibility antigen, Cw-2 alpha chain precursor (MHC class I antigen Cw*2) - Homo sapiens (Human)	1C02_HUMAN	Y	0.379526	1.75274	2.95317	1.31788	1.12804	1.02332	0.572151	1.44219	4.51146	0.777201	2
520718	Q8TCJ2	Dolichyl-diphosphooligosaccharide--protein glycosyltransferase subunit STT3B (EC 2.4.1.119) (Oligosaccharyl transferase subunit STT3B) (STT3-B) (Source of immunodominant MHC-associated peptides homolog) - Homo sapiens (Human)	STT3B_HUMAN	Y	0.379639	1.82317	0.356091	0.600247	0.634769	0.739631	1.6756	8.52393	3.0047	1.28024	2
508837	P42330	Aldo-keto reductase family 1 member C3 (EC 1.-.-.-) (Trans-1,2-dihydrobenzene-1,2-diol dehydrogenase) (EC 1.3.1.20) (3-alpha-hydroxysteroid dehydrogenase type 2) (EC 1.1.1.213) (3-alpha-HSD type 2) (3-alpha-HSD type II, brain) (Prostag	AK1C3_HUMAN	N	0.379711	1	0.32212	1	3.09698	1	1.07243	1	1	4.40566	2
521933	Q9UI30	TRM112-like protein - Homo sapiens (Human)	TR112_HUMAN	N	0.379889	0.543157	0.275257	0.620289	18.1278	2.17385	0.50542	0.466768	0.768504	1.77109	2
516328	O75352	Mannose-P-dolichol utilization defect 1 protein (Suppressor of Lec15 and Lec35 glycosylation mutation homolog) (SL15) - Homo sapiens (Human)	MPU1_HUMAN	Y	0.380198	0.227027	1.34352	0.0479722	0.74016	4.24106	3.02769	0.30297	1	1	2
520361	Q07617	Sperm-associated antigen 1 (Infertility-related sperm protein Spag-1) (HSD-3.8) - Homo sapiens (Human)	SPAG1_HUMAN	N	0.381917	1	0.32212	1	1	1	6.05538	1	3.66939	1	2
508437	Q07000	HLA class I histocompatibility antigen, Cw-15 alpha chain precursor (MHC class I antigen Cw*15) - Homo sapiens (Human)	1C15_HUMAN	Y	0.381981	1.58068	3.83958	1.22792	1.25928	0.917311	0.650691	1.41856	4.80743	0.754832	2
519999	Q86SG5	Protein S100-A7-like 1 (S100 calcium-binding protein A7-like 1) (S100 calcium-binding protein A15) - Homo sapiens (Human)	SA7L1_HUMAN	N	0.383416	2.63431	1	1	1	1	1	4.10105	1	1	2
519058	P17812	CTP synthase 1 (EC 6.3.4.2) (UTP--ammonia ligase 1) (CTP synthetase 1) - Homo sapiens (Human)	PYRG1_HUMAN	N	0.383555	1.26104	0.362581	0.814517	3.92373	4.24106	0.538816	0.192498	0.617576	1	2
519677	O95602	DNA-directed RNA polymerase I largest subunit (EC 2.7.7.6) (RNA polymerase I 194 kDa subunit) (RPA194) - Homo sapiens (Human)	RPA1_HUMAN	N	0.38388	1	4.89129	5.28975	1.73658	1	0.155794	0.151485	0.389612	1.4715	2
509410	P20933	N(4)-(beta-N-acetylglucosaminyl)-L-asparaginase precursor (EC 3.5.1.26) (Glycosylasparaginase) (Aspartylglucosaminidase) (N4-(N-acetyl-beta-glucosaminyl)-L-asparagine amidase) (AGA) [Contains: Glycosylasparaginase alpha chain; Glycosyla	ASPG_HUMAN	N	0.38443	0.0652799	0.0962856	2.0793	0.835394	1	0.711154	1	1	3.51679	2
515802	Q9Y608	Leucine-rich repeat flightless-interacting protein 2 (LRR FLII-interacting protein 2) - Homo sapiens (Human)	LRRF2_HUMAN	N	0.385434	3.40269	0.16106	0.858356	7.25111	0.19534	1.0985	0.724514	1.03449	0.125275	2
519280	Q5XPI4	E3 ubiquitin-protein ligase subunit KPC1 (EC 6.3.2.-) (Kip1 ubiquitination-promoting complex protein 1) (RING finger protein 123) - Homo sapiens (Human)	RN123_HUMAN	N	0.385886	1	2.829	1	1	4.3125	1	1	1	0.881132	2
515089	P00568	Adenylate kinase isoenzyme 1 (EC 2.7.4.3) (ATP-AMP transphosphorylase) (AK1) (Myokinase) - Homo sapiens (Human)	KAD1_HUMAN	N	0.386221	0.814126	5.33668	0.29084	0.962312	0.442795	1.02888	0.940726	4.36206	1.67704	2
512184	Q9HC21	Mitochondrial deoxynucleotide carrier (Solute carrier family 25 member 19) (Mitochondrial uncoupling protein 1) - Homo sapiens (Human)	DNC_HUMAN	N	0.3863	1	1	1	0.826753	4.24106	1	22.8912	0.17708	1	2
522031	Q92995	Ubiquitin carboxyl-terminal hydrolase 13 (EC 3.1.2.15) (Ubiquitin thioesterase 13) (Ubiquitin-specific-processing protease 13) (Deubiquitinating enzyme 13) (Isopeptidase T-3) (ISOT-3) - Homo sapiens (Human)	UBP13_HUMAN	N	0.388643	1.02515	1.75685	1	3.99151	12.7946	0.593575	0.296981	0.696694	1.74877	2
522309	Q9UBT2	Ubiquitin-like 1-activating enzyme E1B (SUMO-1-activating enzyme subunit 2) (Anthracycline-associated resistance ARX) - Homo sapiens (Human)	ULE1B_HUMAN	N	0.38963	1.50282	0.0437446	0.732177	2.03599	3.7978	0.294261	0.105283	0.861142	0.710181	2
514501	P01857	Ig gamma-1 chain C region - Homo sapiens (Human)	IGHG1_HUMAN	Y	0.390679	2.30944	2.38604	0.871744	0.930089	1.79126	0.925923	1.15275	0.312208	1.36412	2
511119	Q7Z4G1	COMM domain-containing protein 6 - Homo sapiens (Human)	COMD6_HUMAN	N	0.391061	1	1	1	0.826753	12.7232	3.17486	0.296981	1	1	2
515393	P01594	Ig kappa chain V-I region AU - Homo sapiens (Human)	KV1B_HUMAN	N	0.391472	1.94851	1.9476	0.324666	1.70368	1.06772	2.49257	1.27177	1	2.29451	2
516045	Q96PE7	Methylmalonyl-CoA epimerase, mitochondrial precursor (EC 5.1.99.1) (DL-methylmalonyl-CoA racemase) - Homo sapiens (Human)	MCEE_HUMAN	N	0.391624	0.227027	0.742744	0.858356	0.802498	0.248191	0.146448	1	2.62513	3.79672	2
509099	P61966	AP-1 complex subunit sigma-1A (Adapter-related protein complex 1 sigma-1A subunit) (Sigma-adaptin 1A) (Adaptor protein complex AP-1 sigma-1A subunit) (Golgi adaptor HA1/AP1 adaptin sigma-1A subunit) (Clathrin assembly protein complex 1	AP1S1_HUMAN	N	0.392352	0.891368	0.296512	0.334985	2.75138	1	0.124628	1.2425	1.03449	2.15356	2
519175	Q9UL25	Ras-related protein Rab-21 - Homo sapiens (Human)	RAB21_HUMAN	N	0.392942	1.19829	0.929602	0.920718	1.04459	3.09424	0.812396	1.25423	18.3469	0.792698	2
516350	Q9UBG0	Macrophage mannose receptor 2 precursor (Urokinase receptor-associated protein) (Endocytic receptor 180) (CD280 antigen) - Homo sapiens (Human)	MRC2_HUMAN	Y	0.395278	1	1	0.214765	3.11483	0.19534	4.83588	1	0.140963	1	2
510833	Q9UGN4	CMRF35-H antigen precursor (CMRF35-H9) (CMRF-35-H9) (CD300a antigen) (Inhibitory receptor protein 60) (IRp60) (IRC1/IRC2) (NK inhibitory receptor) - Homo sapiens (Human)	CM35H_HUMAN	Y	0.396	1	1	0.987507	0.23025	19.442	1	12.9848	1	1	2
512645	O00748	Carboxylesterase 2 precursor (EC 3.1.1.1) (CE-2) (hCE-2) - Homo sapiens (Human)	EST2_HUMAN	N	0.396126	1	1	0.132179	1	8.55357	0.058579	1	1	7.17355	2
515669	P51884	Lumican precursor (Keratan sulfate proteoglycan lumican) (KSPG lumican) - Homo sapiens (Human)	LUM_HUMAN	N	0.397426	1	13.7789	0.14542	1	0.0493135	1	1	0.281925	3.79672	2
521188	P25325	3-mercaptopyruvate sulfurtransferase (EC 2.8.1.2) (MST) - Homo sapiens (Human)	THTM_HUMAN	N	0.397674	0.537173	1.45032	3.99672	1.01048	0.85636	0.603111	0.174979	0.591944	3.79672	2
516691	Q9ULJ8	Neurabin-1 (Neurabin-I) (Neural tissue-specific F-actin-binding protein I) (Protein phosphatase 1 regulatory subunit 9A) - Homo sapiens (Human)	NEB1_HUMAN	N	0.397944	1	1	1	3.62555	1	1	1	2.06898	1	2
519066	Q9NTZ6	RNA-binding protein 12 (RNA-binding motif protein 12) (SH3/WW domain anchor protein in the nucleus) (SWAN) - Homo sapiens (Human)	RBM12_HUMAN	N	0.398047	1.46365	0.360972	0.711585	2.92044	2.11299	0.744009	1.50337	0.343386	0.698387	2
521451	Q8WZ42	Titin (EC 2.7.11.1) (Connectin) (Rhabdomyosarcoma antigen MU-RMS-40.14) - Homo sapiens (Human)	TITIN_HUMAN	N	0.398157	1.0429	1	1	3.11483	1	3.02769	1	1	1	2
519608	Q15404	Ras suppressor protein 1 (Rsu-1) (RSP-1) - Homo sapiens (Human)	RSU1_HUMAN	N	0.398442	0.690496	1.17901	3.10875	0.714131	1.73166	0.823471	3.22657	0.860563	0.649339	2
510780	Q14008	Cytoskeleton-associated protein 5 (Colonic and hepatic tumor over-expressed protein) (Ch-TOG protein) - Homo sapiens (Human)	CKAP5_HUMAN	N	0.399244	0.808211	0.496601	0.256526	1.57436	2.11299	0.443397	2.45203	0.441468	0.745966	2
508835	Q04828	Aldo-keto reductase family 1 member C1 (EC 1.1.1.-) (20-alpha-hydroxysteroid dehydrogenase) (EC 1.1.1.149) (20-alpha-HSD) (Trans-1,2-dihydrobenzene-1,2-diol dehydrogenase) (EC 1.3.1.20) (High-affinity hepatic bile acid-binding protein)	AK1C1_HUMAN	N	0.400946	1	1	1	2.6836	1	3.02769	1	1	1	2
509285	Q13510	Acid ceramidase precursor (EC 3.5.1.23) (Acylsphingosine deacylase) (N-acylsphingosine amidohydrolase) (AC) (Putative 32 kDa heart protein) (PHP32) [Contains: Acid ceramidase subunit alpha; Acid ceramidase subunit beta] - Homo sapiens	ASAH1_HUMAN	N	0.401118	0.847531	4.83969	0.464725	0.63082	3.03173	1.58086	1.7085	1.47749	1.08683	2
520769	P43307	Translocon-associated protein subunit alpha precursor (TRAP-alpha) (Signal sequence receptor subunit alpha) (SSR-alpha) - Homo sapiens (Human)	SSRA_HUMAN	Y	0.402666	0.604112	1.88384	0.452413	2.4981	3.81175	0.383543	1.10128	1.45402	1.35163	2
520591	Q92925	SWI/SNF-related matrix-associated actin-dependent regulator of chromatin subfamily D member 2 (60 kDa BRG-1/Brm-associated factor subunit B) (BRG1-associated factor 60B) - Homo sapiens (Human)	SMRD2_HUMAN	N	0.403381	1	0.393896	0.858356	3.11483	4.24106	0.339094	0.983505	0.206753	1.20969	2
522463	P38606	Vacuolar ATP synthase catalytic subunit A, ubiquitous isoform (EC 3.6.3.14) (V-ATPase subunit A 1) (Vacuolar proton pump alpha subunit 1) (V-ATPase 69 kDa subunit 1) (Isoform VA68) - Homo sapiens (Human)	VATA1_HUMAN	N	0.4035	1.15811	1.901	0.774297	0.734761	4.89066	2.02714	1.56655	0.847627	1.02069	2
516365	Q5VT25	Serine/threonine-protein kinase MRCK alpha (EC 2.7.11.1) (CDC42-binding protein kinase alpha) (Myotonic dystrophy kinase-related CDC42-binding kinase alpha) (Myotonic dystrophy protein kinase-like alpha) (MRCK alpha) (DMPK-like alpha)	MRCKA_HUMAN	N	0.403502	1	0.32212	1	3.62555	1	0.223995	4.78274	0.281925	0.219115	2
508539	Q13131	5'-AMP-activated protein kinase catalytic subunit alpha-1 (EC 2.7.11.1) (AMPK alpha-1 chain) - Homo sapiens (Human)	AAPK1_HUMAN	N	0.403648	1.3785	0.525194	1.97501	1.20954	0.842405	3.37369	1.14082	0.696694	3.65676	2
512736	Q14534	Squalene monooxygenase (EC 1.14.99.7) (Squalene epoxidase) (SE) - Homo sapiens (Human)	ERG1_HUMAN	Y	0.403679	6.80538	1	1	1	1	1	0.291225	1	3.51679	2
521133	Q99757	Thioredoxin, mitochondrial precursor (Mt-Trx) (MTRX) (Thioredoxin-2) - Homo sapiens (Human)	THIOM_HUMAN	N	0.403682	3.40269	9.78258	1	1	1	1	1	1	0.25055	2
509455	Q14692	Ribosome biogenesis protein BMS1 homolog - Homo sapiens (Human)	BMS1_HUMAN	N	0.403915	1	1	3.99672	3.37019	1	0.152064	0.65958	0.313192	1.6025	2
512276	Q9H4M9	EH-domain-containing protein 1 (Testilin) (hPAST1) - Homo sapiens (Human)	EHD1_HUMAN	N	0.404922	1.14642	1.3061	3.40183	2.41709	1.8896	1.04077	0.831931	0.397002	0.703536	2
511990	Q9NP97	Dynein light chain 2A, cytoplasmic (Dynein-associated protein Km23) (Bithoraxoid-like protein) (BLP) - Homo sapiens (Human)	DLC2A_HUMAN	N	0.405078	3.17896	0.0543037	1.00235	1.44891	1.26968	0.30673	0.587584	0.993172	2.12084	2
519725	Q15050	Ribosome biogenesis regulatory protein homolog - Homo sapiens (Human)	RRS1_HUMAN	N	0.405743	0.300966	0.271947	3.99672	7.25111	1	0.402974	0.817342	0.852637	1.3743	2
509655	Q13825	Methylglutaconyl-CoA hydratase, mitochondrial precursor (EC 4.2.1.18) (AU-specific RNA-binding enoyl-CoA hydratase) (AU-binding protein/enoyl-CoA hydratase) - Homo sapiens (Human)	AUMH_HUMAN	N	0.406364	0.739592	1	0.29084	3.62555	0.146	1	0.30297	3.66939	0.831919	2
515392	P01593	Ig kappa chain V-I region AG - Homo sapiens (Human)	KV1A_HUMAN	N	0.406395	1.94851	1.9476	0.324666	1.70368	1.06772	2.49257	1.35412	1	2.00677	2
515411	P01599	Ig kappa chain V-I region Gal - Homo sapiens (Human)	KV1G_HUMAN	N	0.406395	1.94851	1.9476	0.324666	1.70368	1.06772	2.49257	1.35412	1	2.00677	2
515419	P01607	Ig kappa chain V-I region Rei - Homo sapiens (Human)	KV1O_HUMAN	N	0.406395	1.94851	1.9476	0.324666	1.70368	1.06772	2.49257	1.35412	1	2.00677	2
515420	P01608	Ig kappa chain V-I region Roy - Homo sapiens (Human)	KV1P_HUMAN	N	0.406395	1.94851	1.9476	0.324666	1.70368	1.06772	2.49257	1.35412	1	2.00677	2
515421	P01609	Ig kappa chain V-I region Scw - Homo sapiens (Human)	KV1Q_HUMAN	N	0.406395	1.94851	1.9476	0.324666	1.70368	1.06772	2.49257	1.35412	1	2.00677	2
520006	Q9Y2D4	Exocyst complex component Sec15B - Homo sapiens (Human)	SC15B_HUMAN	N	0.408569	1	1	1	1	1	6.05538	0.30297	1	3.51679	2
512354	P19957	Elafin precursor (Elastase-specific inhibitor) (ESI) (Skin-derived antileukoproteinase) (SKALP) (WAP four-disulfide core domain protein 14) (Protease inhibitor WAP3) - Homo sapiens (Human)	ELAF_HUMAN	Y	0.40938	1	1	2.56243	1	1	1	1	1	3.65676	2
516654	Q9BTC8	Metastasis-associated protein MTA3 - Homo sapiens (Human)	MTA3_HUMAN	N	0.410905	0.149139	0.274675	1	3.62555	1	3.02769	1	0.349424	0.863231	2
514986	Q13557	Calcium/calmodulin-dependent protein kinase type II delta chain (EC 2.7.11.17) (CaM-kinase II delta chain) (CaM kinase II subunit delta) (CaMK-II subunit delta) - Homo sapiens (Human)	KCC2D_HUMAN	N	0.411946	0.673564	0.883269	1.27069	0.765894	0.376468	4.57551	1.95938	5.76904	1.68184	2
513943	P13763	HLA class II histocompatibility antigen, DP(W2) beta chain precursor (SB-2-beta) - Homo sapiens (Human)	HB2Q_HUMAN	Y	0.412044	0.804198	53.5648	1.09092	0.483961	1.26252	3.81658	0.890425	1	1.19205	2
520615	Q9UEW8	STE20/SPS1-related proline-alanine-rich protein kinase (EC 2.7.11.1) (Ste-20-related kinase) (Serine/threonine-protein kinase 39) (DCHT) - Homo sapiens (Human)	STK39_HUMAN	N	0.412564	1	1	1	3.62555	1	6.64408	1	0.281925	1	2
512256	P63167	Dynein light chain 1, cytoplasmic (Dynein light chain LC8-type 1) (8 kDa dynein light chain) (DLC8) (Protein inhibitor of neuronal nitric oxide synthase) (PIN) - Homo sapiens (Human)	DYL1_HUMAN	N	0.412579	3.27552	0.437418	1.37585	1.01118	2.12694	0.150056	0.647791	0.870642	0.753777	2
510416	Q5T6V5	Uncharacterized protein C9orf64 - Homo sapiens (Human)	CI064_HUMAN	N	0.413014	0.217355	0.296512	1	3.11483	6.43303	0.146448	0.291225	1	1	2
510906	Q15642	Cdc42-interacting protein 4 (Thyroid receptor-interacting protein 10) (TRIP-10) - Homo sapiens (Human)	CIP4_HUMAN	N	0.413199	3.40269	0.16106	1	0.894533	0.14587	1.12456	1	0.913466	3.51679	2
517838	Q86U42	Polyadenylate-binding protein 2 (Poly(A)-binding protein 2) (Poly(A)-binding protein II) (PABII) (Polyadenylate-binding nuclear protein 1) (Nuclear poly(A)-binding protein 1) - Homo sapiens (Human)	PABP2_HUMAN	N	0.413651	0.970503	0.409026	10.6383	0.93408	8.55357	1.27251	0.196692	1.90088	1.41389	2
511627	Q96KR6	Uncharacterized protein C20orf108 - Homo sapiens (Human)	CT108_HUMAN	Y	0.414324	1	1	0.214765	1	1	0.223995	0.151485	4.1993	3.51679	2
518126	O94880	PHD finger protein 14 - Homo sapiens (Human)	PHF14_HUMAN	N	0.414526	1.61696	0.32212	1	1	1	3.32204	4.10105	1.59639	0.881132	2
513927	P01911	HLA class II histocompatibility antigen, DW2.2/DR2.2 beta chain (Fragment) - Homo sapiens (Human)	HB2G_HUMAN	Y	0.414922	0.824143	31.9321	1.248	0.807779	1.94498	2.87686	1.30028	1	1.22258	2
518861	O75832	26S proteasome non-ATPase regulatory subunit 10 (26S proteasome regulatory subunit p28) (Gankyrin) - Homo sapiens (Human)	PSD10_HUMAN	N	0.415005	0.902897	0.269539	1.16241	0.719647	0.62441	2.12461	0.404682	3.66939	0.848335	2
511178	Q9H3G5	Probable serine carboxypeptidase CPVL precursor (EC 3.4.16.-) (Carboxypeptidase, vitellogenic-like) (Vitellogenic carboxypeptidase-like protein) (VCP-like protein) (HVLP) - Homo sapiens (Human)	CPVL_HUMAN	N	0.415518	1	10.286	0.500506	0.804072	6.21448	0.910538	1.9906	1	1.65633	2
520852	O00506	Serine/threonine-protein kinase 25 (EC 2.7.11.1) (Sterile 20/oxidant stress-response kinase 1) (Ste20/oxidant stress response kinase 1) (SOK-1) (Ste20-like kinase) - Homo sapiens (Human)	STK25_HUMAN	N	0.415599	0.930903	1	3.99672	0.894533	4.3125	0.843309	1	1.29955	1	2
519084	Q96T37	Putative RNA-binding protein 15 (RNA-binding motif protein 15) (One-twenty two protein) - Homo sapiens (Human)	RBM15_HUMAN	N	0.41616	0.695766	0.0898179	1.50754	0.808345	19.3705	2.20702	0.649458	0.459906	0.324746	2
513942	P04440	HLA class II histocompatibility antigen, DP(W4) beta chain precursor - Homo sapiens (Human)	HB2P_HUMAN	Y	0.416843	0.717072	53.5648	1.29873	0.457701	1.26252	3.81658	0.873913	1	1.19205	2
521911	Q96NA8	t-SNARE domain-containing protein 1 - Homo sapiens (Human)	TSNA1_HUMAN	Y	0.418392	1	5.92505	1.13605	0.62887	4.24106	1	1	1	1	2
509098	Q9Y6Q5	AP-1 complex subunit mu-2 (Adaptor-related protein complex 1 mu-2 subunit) (Mu-adaptin 2) (Adaptor protein complex AP-1 mu-2 subunit) (Golgi adaptor HA1/AP1 adaptin mu-2 subunit) (Clathrin assembly protein assembly protein complex 1 me	AP1M2_HUMAN	N	0.418434	0.246531	1	3.99672	0.687845	4.38395	0.74412	0.30297	1	0.25055	2
510783	O76031	ATP-dependent Clp protease ATP-binding subunit ClpX-like, mitochondrial precursor - Homo sapiens (Human)	CLPX_HUMAN	N	0.419491	4.79812	0.37759	0.829711	0.573762	4.38395	0.649501	0.219471	1.10919	0.917938	2
508432	Q29963	HLA class I histocompatibility antigen, Cw-6 alpha chain precursor (MHC class I antigen Cw*6) - Homo sapiens (Human)	1C06_HUMAN	Y	0.420337	1.4589	3.80654	1.24049	1.14464	0.963678	0.637561	1.27518	4.80743	0.848234	2
511239	Q9NQ79	Cartilage acidic protein 1 precursor (Chondrocyte expressed protein 68 kDa) (CEP-68) (ASPIC) - Homo sapiens (Human)	CRAC1_HUMAN	N	0.420381	4.79812	1	1	1	4.38395	0.292895	1	1	1	2
519224	O15258	RER1 protein - Homo sapiens (Human)	RER1_HUMAN	Y	0.420782	4.10041	0.137338	1	0.540282	1	0.464951	0.296981	3.47696	0.125275	2
520534	Q9Y5W7	Sorting nexin-14 - Homo sapiens (Human)	SNX14_HUMAN	Y	0.421109	0.974256	0.299592	0.626897	5.18297	0.418876	1.24628	0.497584	2.21838	1.4715	2
510946	P08123	Collagen alpha-2(I) chain precursor - Homo sapiens (Human)	CO1A2_HUMAN	N	0.423014	1	5.92505	1	0.962312	0.0520111	1	4.78274	1	1	2
522126	Q9H1C4	UNC93 homolog B1 (UNC-93B protein) (hUNC93B1) - Homo sapiens (Human)	UN93B_HUMAN	Y	0.42334	0.499257	7.6871	0.463256	1.03452	1.48771	1.82733	1.8879	3.32757	0.25055	2
511730	Q9NVH1	DnaJ homolog subfamily C member 11 - Homo sapiens (Human)	DCJ11_HUMAN	N	0.423387	18.103	0.0494186	0.387469	0.843542	1	0.234486	0.32979	3.70715	1.07957	2
514772	Q7LBC6	JmjC domain-containing histone demethylation protein 2B (EC 1.14.11.-) (Jumonji domain-containing protein 1B) (Nuclear protein 5qNCA) - Homo sapiens (Human)	JHD2B_HUMAN	N	0.423427	0.439315	4.03055	0.173417	3.73632	0.85636	0.595121	1.2425	0.255348	0.859395	2
519372	Q7L804	Rab11 family-interacting protein 2 (Rab11-FIP2) (NRip11) - Homo sapiens (Human)	RFIP2_HUMAN	N	0.424088	0.2376	0.192571	1	1.23335	4.24106	0.253853	0.30297	1	3.79672	2
510759	P10643	Complement component C7 precursor - Homo sapiens (Human)	CO7_HUMAN	N	0.425267	1	17.6364	1	1	0.167104	1	1	1	3.51679	2
519723	P30876	DNA-directed RNA polymerase II 140 kDa polypeptide (EC 2.7.7.6) (RNA polymerase II subunit 2) (RPB2) - Homo sapiens (Human)	RPB2_HUMAN	N	0.426091	0.721719	0.834983	2.16543	1.03408	1.00113	2.11448	0.32979	0.149638	1.41612	2
510553	Q8N1K5	Uncharacterized protein C6orf190 - Homo sapiens (Human)	CF190_HUMAN	N	0.427777	3.40269	0.32212	1	0.265425	0.640056	0.253853	8.2021	0.281925	0.25055	2
510607	Q9H444	Charged multivesicular body protein 4b (Chromatin-modifying protein 4b) (CHMP4b) (Vacuolar protein sorting 7-2) (SNF7-2) (hSnf7-2) (SNF7 homolog associated with Alix 1) (hVps32) - Homo sapiens (Human)	CHM4B_HUMAN	N	0.430017	1.4135	0.598021	1.15177	2.69703	1.27058	2.80214	0.722844	0.643379	1.17955	2
517189	O95848	Uridine diphosphate glucose pyrophosphatase (EC 3.6.1.45) (UDPG pyrophosphatase) (UGPPase) (Nucleoside diphosphate-linked moiety X motif 14) (Nudix motif 14) - Homo sapiens (Human)	NUD14_HUMAN	N	0.430639	4.79812	0.107373	1	1	1	0.111997	0.296981	1.62644	3.51679	2
513568	P34896	Serine hydroxymethyltransferase, cytosolic (EC 2.1.2.1) (Serine methylase) (Glycine hydroxymethyltransferase) (SHMT) - Homo sapiens (Human)	GLYC_HUMAN	N	0.430682	1.23061	0.571569	0.36467	6.48502	2.55512	1.64069	0.154617	1.93434	0.836222	2
514694	Q13576	Ras GTPase-activating-like protein IQGAP2 - Homo sapiens (Human)	IQGA2_HUMAN	N	0.430912	1.11708	0.681891	1.87728	0.8731	2.96935	6.05538	1.53497	1.771	1.04965	2
510969	Q8N806	Uncharacterized protein C14orf130 - Homo sapiens (Human)	CN130_HUMAN	N	0.431468	1	0.107373	1	1	0.146	3.02769	1	3.66939	1	2
519662	Q9Y676	28S ribosomal protein S18b, mitochondrial precursor (MRP-S18-b) (Mrps18b) (MRP-S18-2) - Homo sapiens (Human)	RT18B_HUMAN	N	0.43148	0.58852	0.75518	0.626897	0.826753	0.414225	2.01007	1.39285	3.66939	0.427439	2
522536	P52735	Protein vav-2 - Homo sapiens (Human)	VAV2_HUMAN	N	0.431565	4.79812	1	1	6.22966	1	0.597011	0.0735188	0.281925	0.25055	2
509123	P07741	Adenine phosphoribosyltransferase (EC 2.4.2.7) (APRT) - Homo sapiens (Human)	APT_HUMAN	N	0.431857	1.30885	1.01386	0.564312	1.53205	10.5187	1.66634	0.282382	2.27494	0.397547	2
515378	P11047	Laminin gamma-1 chain precursor (Laminin B2 chain) - Homo sapiens (Human)	LAMC1_HUMAN	N	0.432492	0.80848	0.539079	3.99672	1.169	0.0158059	19.8507	0.92857	0.535921	1.46428	2
518972	P51159	Ras-related protein Rab-27A (Rab-27) (GTP-binding protein Ram) - Homo sapiens (Human)	RB27A_HUMAN	N	0.432636	1	1	12.6367	0.389813	8.76789	1	0.30297	1	1	2
517005	Q9UKX7	Nucleoporin 50 kDa (Nuclear pore-associated protein 60 kDa-like) - Homo sapiens (Human)	NUP50_HUMAN	N	0.43315	0.568337	1.30902	1.25379	0.856538	4.3125	0.421703	3.95748	0.229974	0.413598	2
521776	Q9UJA5	tRNA (adenine-N(1)-)-methyltransferase non-catalytic subunit TRM6 (tRNA(m1A58)-methyltransferase subunit TRM6) (tRNA(m1A58)MTase subunit TRM6) - Homo sapiens (Human)	TRM6_HUMAN	N	0.433356	2.42544	0.725162	2.29449	1.62317	0.628315	0.115557	0.817342	0.461577	1.11564	2
511420	Q6ICL3	Uncharacterized protein C22orf25 - Homo sapiens (Human)	CV025_HUMAN	N	0.433766	1	2.44662	1	1	4.24106	1	1	1	1	2
513877	P11169	Solute carrier family 2, facilitated glucose transporter member 3 (Glucose transporter type 3, brain) - Homo sapiens (Human)	GTR3_HUMAN	Y	0.4338	1	1.57558	3.10326	1.23034	1	6.05538	1.00475	1	1	2
513417	Q10471	Polypeptide N-acetylgalactosaminyltransferase 2 (EC 2.4.1.41) (Protein-UDP acetylgalactosaminyltransferase 2) (UDP-GalNAc:polypeptide N-acetylgalactosaminyltransferase 2) (Polypeptide GalNAc transferase 2) (GalNAc-T2) (pp-GaNTase 2) [C	GALT2_HUMAN	Y	0.435122	1.98427	1.19116	0.915592	0.999174	2.02734	1.27059	3.18435	1.23515	0.748269	2
521303	P22735	Protein-glutamine gamma-glutamyltransferase K (EC 2.3.2.13) (Transglutaminase K) (TGase K) (TGK) (TG(K)) (Transglutaminase-1) (Epidermal TGase) - Homo sapiens (Human)	TGM1_HUMAN	N	0.435209	1.73054	0.274675	1.15059	1	8.76789	3.02769	0.332201	0.184328	0.25055	2
515481	P06312	Ig kappa chain V-IV region precursor (Fragment) - Homo sapiens (Human)	KV40_HUMAN	N	0.435597	1	2.7921	1.05742	0.962312	21.5625	0.805948	1.44667	0.0911766	0.397767	2
515483	P06313	Ig kappa chain V-IV region JI precursor - Homo sapiens (Human)	KV4B_HUMAN	N	0.435597	1	2.7921	1.05742	0.962312	21.5625	0.805948	1.44667	0.0911766	0.397767	2
515484	P06314	Ig kappa chain V-IV region B17 precursor - Homo sapiens (Human)	KV4C_HUMAN	N	0.435597	1	2.7921	1.05742	0.962312	21.5625	0.805948	1.44667	0.0911766	0.397767	2
514131	P46199	Translation initiation factor IF-2, mitochondrial precursor (IF-2Mt) (IF-2(Mt)) - Homo sapiens (Human)	IF2M_HUMAN	N	0.436648	1	0.0641904	0.29084	1	1	0.360281	1	4.1993	2.30804	2
521480	Q7Z403	Transmembrane channel-like protein 6 (Epidermodysplasia verruciformis protein 1) (Protein LAK-4) - Homo sapiens (Human)	TMC6_HUMAN	Y	0.436713	0.217355	1	1	1	1	3.02769	1	1	11.3902	2
515635	Q9C0E8	Protein lunapark - Homo sapiens (Human)	LNP_HUMAN	Y	0.437382	0.0900098	1	3.99672	3.37019	0.828449	1	0.296981	0.140963	1.90254	2
521485	O14787	Transportin-2 (Karyopherin beta-2b) - Homo sapiens (Human)	TNPO2_HUMAN	N	0.437393	0.319716	0.1126	1.40595	0.858891	3.31626	1.03247	0.408434	0.61553	2.73788	2
520982	Q9UMZ2	AP1 subunit gamma-binding protein 1 (Gamma-synergin) - Homo sapiens (Human)	SYNG_HUMAN	N	0.437595	1	0.296512	1	6.22966	1	3.02769	1	1	1	2
522643	Q562E7	WD repeat protein 81 - Homo sapiens (Human)	WDR81_HUMAN	N	0.438314	1	1	0.581203	0.756741	10.7455	0.074665	0.529759	0.324888	3.51679	2
518090	O00541	Pescadillo homolog 1 - Homo sapiens (Human)	PESC_HUMAN	N	0.439686	2.31751	0.154393	7.99345	1.26954	1	0.278567	0.690117	0.526001	0.859845	2
522701	P67809	Nuclease sensitive element-binding protein 1 (Y-box-binding protein 1) (Y-box transcription factor) (YB-1) (CCAAT-binding transcription factor I subunit A) (CBF-A) (Enhancer factor I subunit A) (EFI-A) (DNA-binding protein B) (DBPB) -	YBOX1_HUMAN	N	0.439721	2.07516	0.698557	0.835139	2.59799	0.926758	0.831679	0.733241	0.560064	0.542079	2
508666	P13798	Acylamino-acid-releasing enzyme (EC 3.4.19.1) (AARE) (Acyl-peptide hydrolase) (APH) (Acylaminoacyl-peptidase) (Oxidized protein hydrolase) (OPH) (DNF15S2 protein) - Homo sapiens (Human)	ACPH_HUMAN	N	0.439797	1.31715	0.834983	0.942579	3.10761	4.01958	0.783876	0.560686	0.856365	1.6934	2
518709	P49768	Presenilin-1 (EC 3.4.23.-) (PS-1) (Protein S182) [Contains: Presenilin-1 NTF subunit; Presenilin-1 CTF subunit; Presenilin-1 CTF12 (PS1-CTF12)] - Homo sapiens (Human)	PSN1_HUMAN	Y	0.440042	1	1.47588	1	1.23335	1	3.32204	1	1	3.51679	2
521012	O14662	Syntaxin-16 (Syn16) - Homo sapiens (Human)	STX16_HUMAN	Y	0.440063	1	0.274675	3.99672	3.62555	1	0.223995	1	0.281925	0.475635	2
508818	O95433	Activator of 90 kDa heat shock protein ATPase homolog 1 (AHA1) (p38) - Homo sapiens (Human)	AHSA1_HUMAN	N	0.4401	2.11931	0.684695	1.641	1.22167	19.442	1.24552	0.65235	0.961204	0.527569	2
514572	O94829	Importin-13 (Imp13) (Ran-binding protein 13) (RanBP13) (Karyopherin 13) (Kap13) - Homo sapiens (Human)	IPO13_HUMAN	N	0.441142	1	0.274675	1	7.25111	1	0.111997	0.10099	2.06898	0.881132	2
520062	Q8IX01	Putative splicing factor, arginine/serine-rich 14 (Arginine/serine-rich-splicing factor 14) - Homo sapiens (Human)	SFR14_HUMAN	N	0.442218	1	1	7.99345	7.25111	1	0.698704	1	1	1.70976	2
520388	P35610	Sterol O-acyltransferase 1 (EC 2.3.1.26) (Cholesterol acyltransferase 1) (Acyl coenzyme A:cholesterol acyltransferase 1) (ACAT-1) - Homo sapiens (Human)	SOAT1_HUMAN	Y	0.443701	1	5.40817	1	0.413377	8.48212	1	1	1	1	2
518767	Q7Z3G6	Prickle-like protein 2 - Homo sapiens (Human)	PRIC2_HUMAN	N	0.443926	0.149139	0.32212	1	3.62555	1	0.223995	0.196692	4.1993	1.57183	2
520956	Q92797	Symplekin - Homo sapiens (Human)	SYMPK_HUMAN	N	0.444307	0.557045	0.763431	0.557649	0.562821	12.8661	0.501046	8.54295	0.407256	1.19713	2
509514	Q9H3Q1	Cdc42 effector protein 4 (Binder of Rho GTPases 4) - Homo sapiens (Human)	BORG4_HUMAN	N	0.444563	8.20081	0.0338426	1	3.11483	1	0.256889	0.783106	1.79885	1.50552	2
518447	P05187	Alkaline phosphatase, placental type precursor (EC 3.1.3.1) (PLAP-1) (Regan isozyme) - Homo sapiens (Human)	PPB1_HUMAN	N	0.444722	1	0.154393	7.99345	0.836533	19.1821	1	0.0983458	1	1	2
508440	Q29865	HLA class I histocompatibility antigen, Cw-18 alpha chain precursor (MHC class I antigen Cw*18) - Homo sapiens (Human)	1C18_HUMAN	Y	0.445844	1.03216	7.65643	1.15321	1.02092	0.820275	1.59619	1.8747	12.3329	0.672085	2
508433	P10321	HLA class I histocompatibility antigen, Cw-7 alpha chain precursor (MHC class I antigen Cw*7) - Homo sapiens (Human)	1C07_HUMAN	Y	0.445937	1.5079	4.79477	1.31982	1.20973	0.826028	0.620985	1.24324	3.95686	0.767503	2
513757	P84243	Histone H3.3 - Homo sapiens (Human)	H33_HUMAN	N	0.446837	0.410515	0.846556	1.86539	0.519223	0.77878	1.80442	1.65166	11.4712	6.25858	2
519880	Q5K651	Sterile alpha motif domain-containing protein 9 - Homo sapiens (Human)	SAMD9_HUMAN	N	0.44741	0.108677	1	0.917333	2.33888	10.7455	0.74412	0.269152	0.34158	1	2
516163	Q9UHY7	Enolase-phosphatase E1 (EC 3.1.3.77) (2,3-diketo-5-methylthio-1-phosphopentane phosphatase) (MASA homolog) - Homo sapiens (Human)	MASA_HUMAN	N	0.448091	0.772503	0.32212	1.16241	0.802498	6.43303	12.1108	1	0.281925	1.07229	2
522473	P04275	von Willebrand factor precursor (vWF) [Contains: von Willebrand antigen 2 (von Willebrand antigen II)] - Homo sapiens (Human)	VWF_HUMAN	N	0.449075	3.40269	4.89129	1	1	0.0260213	1	1	1	1	2
511096	O95232	Cisplatin resistance-associated overexpressed protein (cAMP regulatory element-associated protein 1) (CRE-associated protein 1) (CREAP-1) (Luc7A) (Okadaic acid-inducible phosphoprotein OA48-18) - Homo sapiens (Human)	CROP_HUMAN	N	0.451789	1.0893	0.0602605	1.13605	3.30701	1	2.91903	0.291225	0.359185	0.58512	2
511302	Q16850	Cytochrome P450 51A1 (EC 1.14.13.70) (CYPLI) (P450LI) (Sterol 14-alpha demethylase) (Lanosterol 14-alpha demethylase) (LDM) (P450-14DM) (P45014DM) - Homo sapiens (Human)	CP51A_HUMAN	Y	0.452207	0.0269205	0.787791	0.247079	5.3672	3.45773	0.74412	0.0229144	0.948661	1.79733	2
520650	P27105	Erythrocyte band 7 integral membrane protein (Stomatin) (Protein 7.2b) - Homo sapiens (Human)	STOM_HUMAN	Y	0.45223	0.998514	31.2539	0.769622	0.393995	0.756304	1.86539	1.96835	1.25652	2.48159	2
509278	Q7Z3C6	Autophagy-related protein 9A (APG9-like 1) - Homo sapiens (Human)	ATG9A_HUMAN	Y	0.453485	3.40269	4.89129	1	1	1	1	0.30297	1	1	2
516096	P49137	MAP kinase-activated protein kinase 2 (EC 2.7.11.1) (MAPK-activated protein kinase 2) (MAPKAP kinase 2) (MAPKAPK-2) (MK2) - Homo sapiens (Human)	MAPK2_HUMAN	N	0.453646	1	1	1	1	4.24106	0.292895	1	4.1993	1	2
522253	O76003	Thioredoxin-like protein 2 (PKC-interacting cousin of thioredoxin) (PKC-theta-interacting protein) (PKCq-interacting protein) - Homo sapiens (Human)	TXNL2_HUMAN	N	0.454162	2.57774	1.17901	0.573623	2.27186	1.44127	1.18526	0.978216	0.494481	0.973557	2
512828	Q96A65	Exocyst complex component 4 (Exocyst complex component Sec8) - Homo sapiens (Human)	EXOC4_HUMAN	N	0.454872	0.222127	1.45032	1.13605	2.13783	2.09903	0.93573	0.298582	0.813218	0.916201	2
520094	Q01130	Splicing factor, arginine/serine-rich 2 (Splicing factor SC35) (SC-35) (Splicing component, 35 kDa) (Protein PR264) - Homo sapiens (Human)	SFRS2_HUMAN	N	0.455227	81.568	0.0859477	0.73505	0.0178949	43.8395	0.216726	1.63667	1.53793	0.0418664	2
513027	Q9Y3I1	F-box only protein 7 - Homo sapiens (Human)	FBX7_HUMAN	N	0.455238	0.531593	13.262	1	0.458563	0.083552	0.973008	0.30297	0.17708	3.65676	2
518769	P04156	Major prion protein precursor (PrP) (PrP27-30) (PrP33-35C) (ASCR) (CD230 antigen) - Homo sapiens (Human)	PRIO_HUMAN	Y	0.45703	0.217355	1	1	7.25111	4.38395	1	1.39285	1	0.881132	2
513945	P04232	HLA class II histocompatibility antigen, SB beta chain (Clone PHA-beta) (Fragment) - Homo sapiens (Human)	HB2T_HUMAN	Y	0.457942	0.439051	46.2279	1.13337	0.316586	0.835427	4.54338	0.991821	1	0.89167	2
512558	Q8WUP2	Filamin-binding LIM protein 1 (Filamin-binding LIM protein 1) (FBLP-1) (Mitogen-inducible 2-interacting protein) (MIG2-interacting protein) (Migfilin) - Homo sapiens (Human)	FBLI1_HUMAN	N	0.458035	0.507475	1	1	3.62555	1	0.0739374	0.145613	7.33878	1	2
513039	Q06787	Fragile X mental retardation 1 protein (Protein FMR-1) (FMRP) - Homo sapiens (Human)	FMR1_HUMAN	N	0.458036	3.33736	0.246978	1.56523	2.92044	1	1.41641	0.370803	0.0855345	0.818884	2
522078	O94888	UBX domain-containing protein 7 - Homo sapiens (Human)	UBXD7_HUMAN	N	0.458246	1.27437	0.0689361	3.99672	3.11483	1	0.711154	0.615046	0.684665	0.381982	2
510466	Q8TDI0	Chromodomain helicase-DNA-binding protein 5 (EC 3.6.1.-) (ATP-dependent helicase CHD5) (CHD-5) - Homo sapiens (Human)	CHD5_HUMAN	N	0.459006	0.948266	0.38557	1.05609	3.9402	0.732575	3.34763	0.40732	0.255222	1.62321	2
513272	Q96GT9	G antigen family D member 3 (Protein XAGE-2) - Homo sapiens (Human)	GAGD3_HUMAN	N	0.460032	5.80175	0.274675	1	3.37019	1	1	1	1	1	2
516494	Q8WX94	NACHT, LRR and PYD-containing protein 7 (PYRIN-containing APAF1-like protein 3) - Homo sapiens (Human)	NALP7_HUMAN	N	0.461078	1	1	1.25642	3.37019	1	1	2.43587	1	1	2
514850	Q96AT1	Protein KIAA1143 - Homo sapiens (Human)	K1143_HUMAN	N	0.461718	1	1	1	1	1	6.34973	1	3.66939	0.25055	2
511481	P08174	Complement decay-accelerating factor precursor (CD55 antigen) - Homo sapiens (Human)	DAF_HUMAN	N	0.462271	0.739592	1	1	0.265425	17.1786	0.947567	1	3.66939	1	2
521046	Q15833	Syntaxin-binding protein 2 (Unc-18 homolog 2) (Unc-18B) (Unc18-2) - Homo sapiens (Human)	STXB2_HUMAN	N	0.463271	1.02943	1.02378	1.62242	0.977889	2.74549	0.5798	2.17669	0.710389	0.44256	2
514498	P01877	Ig alpha-2 chain C region - Homo sapiens (Human)	IGHA2_HUMAN	N	0.46335	4.15054	3.82549	0.741077	0.115999	1.31814	0.806133	1.17528	0.117001	1.27109	2
512476	Q969S9	Elongation factor G 2, mitochondrial precursor (mEF-G 2) (Elongation factor G2) - Homo sapiens (Human)	EFG2_HUMAN	N	0.463527	1	0.203055	1	3.11483	1	0.074665	0.30297	7.33878	0.8876	2
510826	Q9NVM9	Protein C12orf11 (Sarcoma antigen NY-SAR-95) - Homo sapiens (Human)	CL011_HUMAN	N	0.463576	0.149139	0.946549	5.28975	1.86816	0.146	0.787268	1.14082	0.290933	5.41515	2
516910	Q9P0J0	NADH dehydrogenase [ubiquinone] 1 alpha subcomplex subunit 13 (EC 1.6.5.3) (EC 1.6.99.3) (NADH-ubiquinone oxidoreductase B16.6 subunit) (Complex I-B16.6) (CI-B16.6) (Gene associated with retinoic-interferon-induced mortality 19 protein	NDUAD_HUMAN	Y	0.464095	1.47555	0.801792	0.406968	1.54849	1.53389	0.993628	3.54109	3.66939	1.21143	2
508740	P35612	Beta-adducin (Erythrocyte adducin subunit beta) - Homo sapiens (Human)	ADDB_HUMAN	N	0.464131	1	105.957	1	1	0.0325567	1	1	1	7.03359	2
513778	Q8WUI4	Histone deacetylase 7a (HD7a) - Homo sapiens (Human)	HDAC7_HUMAN	N	0.465153	1	0.120521	1	1	0.85636	0.292895	0.291225	4.1993	3.51679	2
509541	Q8TD16	Cytoskeleton-like bicaudal D protein homolog 2 - Homo sapiens (Human)	BICD2_HUMAN	N	0.465276	1	0.32212	1	1	4.38395	3.17486	1	1	1	2
521282	Q9BQ70	Transcription factor 25 (Nuclear localized protein 1) - Homo sapiens (Human)	TCF25_HUMAN	N	0.465605	0.80848	1	3.99672	0.802498	1	3.32204	1	1	1	2
511140	Q02318	Cytochrome P450 27, mitochondrial precursor (EC 1.14.13.15) (Cytochrome P-450C27/25) (Sterol 26-hydroxylase) (Sterol 27-hydroxylase) (Vitamin D(3) 25-hydroxylase) (5-beta-cholestane-3-alpha,7-alpha,12-alpha-triol 27-hydroxylase) - Homo	CP27A_HUMAN	N	0.469562	1	24.4565	0.29084	0.62255	34.4286	1	1.80517	1	1	2
510245	P08185	Corticosteroid-binding globulin precursor (CBG) (Transcortin) (Serpin A6) - Homo sapiens (Human)	CBG_HUMAN	N	0.46996	1	7.85382	1	1	1	0.223995	1	1	3.51679	2
520574	O60749	Sorting nexin-2 (Transformation-related gene 9 protein) (TRG-9) - Homo sapiens (Human)	SNX2_HUMAN	N	0.470264	1.42477	0.50047	1.35794	1.7999	5.47731	0.890772	2.18884	0.664488	0.404279	2
522553	O00507	Probable ubiquitin carboxyl-terminal hydrolase FAF-Y (EC 3.1.2.15) (Ubiquitin thioesterase FAF-Y) (Ubiquitin-specific-processing protease FAF-Y) (Deubiquitinating enzyme FAF-Y) (Fat facets protein-related, Y-linked) (Ubiquitin-specific	USP9Y_HUMAN	N	0.475823	0.987866	2.10914	4.42925	1.0295	1.16153	1.34998	1.05917	0.35872	0.654895	2
521960	Q9Y5S1	Transient receptor potential cation channel subfamily V member 2 (TrpV2) (osm-9-like TRP channel 2) (OTRPC2) (Vanilloid receptor-like protein 1) (VRL-1) - Homo sapiens (Human)	TRPV2_HUMAN	Y	0.475964	1	4.89129	3.99672	0.265425	1	1	1	1	1	2
519230	Q02094	Rhesus blood group-associated glycoprotein (Rhesus blood group-associated ammonia channel) (Erythrocyte plasma membrane 50 kDa glycoprotein) (Rh50A) (CD241 antigen) - Homo sapiens (Human)	RHAG_HUMAN	Y	0.476129	1	29.3477	1	1	0.0651133	1	1	1	10.5504	2
516630	P04732	Metallothionein-1E (MT-1E) (Metallothionein-IE) (MT-IE) - Homo sapiens (Human)	MT1E_HUMAN	N	0.476686	0.443617	0.49561	3.99672	0.102454	0.640056	4.36284	0.0834834	0.17708	1	2
516632	P13640	Metallothionein-1G (MT-1G) (Metallothionein-IG) (MT-IG) (Metallothionein-1K) (MT-1K) - Homo sapiens (Human)	MT1G_HUMAN	N	0.476686	0.443617	0.49561	3.99672	0.102454	0.640056	4.36284	0.0834834	0.17708	1	2
516634	P80295	Metallothionein-1I (MT-1I) (Metallothionein-II) - Homo sapiens (Human)	MT1I_HUMAN	N	0.476686	0.443617	0.49561	3.99672	0.102454	0.640056	4.36284	0.0834834	0.17708	1	2
516636	Q8N339	Metallothionein-1M (MT-1M) (Metallothionein-IM) (MT-IM) - Homo sapiens (Human)	MT1M_HUMAN	N	0.476686	0.443617	0.49561	3.99672	0.102454	0.640056	4.36284	0.0834834	0.17708	1	2
516637	P80297	Metallothionein-1X (MT-1X) (Metallothionein-IX) (MT-IX) - Homo sapiens (Human)	MT1X_HUMAN	N	0.476686	0.443617	0.49561	3.99672	0.102454	0.640056	4.36284	0.0834834	0.17708	1	2
516638	P02795	Metallothionein-2 (MT-2) (Metallothionein-II) (MT-II) (Metallothionein-2A) - Homo sapiens (Human)	MT2_HUMAN	N	0.476686	0.443617	0.49561	3.99672	0.102454	0.640056	4.36284	0.0834834	0.17708	1	2
511938	O43237	Cytoplasmic dynein 1 light intermediate chain 2 (Dynein light intermediate chain 2, cytosolic) (LIC53/55) (LIC-2) - Homo sapiens (Human)	DC1L2_HUMAN	N	0.477406	0.222831	0.0209416	1.26894	0.731809	17.1786	3.02987	0.505585	1.32457	0.548055	2
511904	Q16760	Diacylglycerol kinase delta (EC 2.7.1.107) (Diglyceride kinase delta) (DGK-delta) (DAG kinase delta) (130 kDa diacylglycerol kinase) - Homo sapiens (Human)	DGKD_HUMAN	N	0.478201	1	0.274675	0.214765	1	1	0.118996	4.4419	1.18389	3.65676	2
521240	Q9H3H9	Transcription elongation factor A protein-like 2 (TCEA-like protein 2) (Transcription elongation factor S-II protein-like 2) - Homo sapiens (Human)	TCAL2_HUMAN	N	0.478275	1	1	1	3.11483	1	1	1	1	2.35401	2
509157	P53680	AP-2 complex subunit sigma-1 (Adapter-related protein complex 2 sigma-1 subunit) (Clathrin coat assembly protein AP17) (Clathrin coat-associated protein AP17) (Plasma membrane adaptor AP-2 17 kDa protein) (HA2 17 kDa subunit) (Clathrin	AP2S1_HUMAN	N	0.478615	1	4.89129	1	3.62555	1	0.292895	1.2425	1.03449	1	2
518449	P10696	Alkaline phosphatase, placental-like precursor (EC 3.1.3.1) (Nagao isozyme) (Germ-cell alkaline phosphatase) (GCAP) (PLAP-like) (ALP-1) - Homo sapiens (Human)	PPBN_HUMAN	N	0.478769	1	0.154393	7.99345	0.767355	16.4339	1	0.0983458	1	1	2
519663	Q9Y3D5	28S ribosomal protein S18c, mitochondrial precursor (MRP-S18-c) (Mrps18c) (MRP-S18-1) - Homo sapiens (Human)	RT18C_HUMAN	N	0.478897	0.1188	1	0.581203	3.62555	0.842405	3.17486	0.30297	1	1	2
515457	P01624	Ig kappa chain V-III region POM - Homo sapiens (Human)	KV3F_HUMAN	N	0.479196	1	1.69971	0.173417	1	4.3125	1	1.39285	1	5.41515	2
515459	P04207	Ig kappa chain V-III region CLL precursor (Rheumatoid factor) - Homo sapiens (Human)	KV3H_HUMAN	N	0.479196	1	1.69971	0.173417	1	4.3125	1	1.39285	1	5.41515	2
515461	P04434	Ig kappa chain V-III region VH precursor (Fragment) - Homo sapiens (Human)	KV3J_HUMAN	N	0.479196	1	1.69971	0.173417	1	4.3125	1	1.39285	1	5.41515	2
511472	P12074	Cytochrome c oxidase polypeptide VIa-liver, mitochondrial precursor (EC 1.9.3.1) - Homo sapiens (Human)	CX6A1_HUMAN	Y	0.482206	1.63084	0.862747	0.384737	0.195502	0.579366	1.32187	3.22657	2.39459	1.28232	2
508431	Q9TNN7	HLA class I histocompatibility antigen, Cw-5 alpha chain precursor (MHC class I antigen Cw*5) - Homo sapiens (Human)	1C05_HUMAN	Y	0.483453	1.69651	2.07594	1.1487	0.944738	1.77055	0.593831	1.36884	3.91951	0.938663	2
518039	Q8NF37	1-acylglycerophosphocholine O-acyltransferase 1 (EC 2.3.1.23) (Lung-type acyl-coa:lysophosphatidylcholine acyltransferase 1) (Acyltransferase-like 2) (Phosphonoformate immuno-associated protein 3) - Homo sapiens (Human)	PCAT1_HUMAN	Y	0.48355	0.111043	1.50141	0.828956	0.454044	3.95753	7.2909	1.23009	0.17708	1.26596	2
520706	P02549	Spectrin alpha chain, erythrocyte (Erythroid alpha-spectrin) - Homo sapiens (Human)	SPTA1_HUMAN	N	0.484239	1	85.5629	0.186371	1.68708	0.00625644	1.53241	1	1	233.193	2
509187	Q92572	AP-3 complex subunit sigma-1 (Adapter-related protein complex 3 sigma-1 subunit) (Sigma-adaptin 3a) (AP-3 complex sigma-3A subunit) (Sigma-3A-adaptin) (Clathrin-associated/assembly/adapter protein, small 3) - Homo sapiens (Human)	AP3S1_HUMAN	N	0.484596	0.40424	1	1.71671	1.68708	2.48535	15.1384	0.983505	0.304489	0.8876	2
519588	P31151	Protein S100-A7 (S100 calcium-binding protein A7) (Psoriasin) - Homo sapiens (Human)	S10A7_HUMAN	N	0.48462	2.38805	1	1	1	1	1	4.10105	1	1	2
522010	Q9Y2L5	Protein TRS85 homolog - Homo sapiens (Human)	TRS85_HUMAN	N	0.484945	1	0.32212	1	1.10104	12.7232	3.02769	1.29359	0.649775	1	2
511294	Q8WTW3	Conserved oligomeric Golgi complex component 1 - Homo sapiens (Human)	COG1_HUMAN	N	0.485012	1	0.32212	1	1	1	3.02769	1	4.1993	1	2
521459	P84157	Transmembrane anchor protein 1 - Homo sapiens (Human)	TMAP1_HUMAN	Y	0.485611	4.10041	1	1	0.907458	1	1.35637	0.151485	5.62065	0.881132	2
522347	Q86VN1	Vacuolar protein sorting-associated protein 36 (ELL-associated protein of 45 kDa) - Homo sapiens (Human)	VPS36_HUMAN	N	0.486751	1	0.154393	1	10.8767	1	1	1.44903	1	3.51679	2
510212	O14618	Copper chaperone for superoxide dismutase (Superoxide dismutase copper chaperone) - Homo sapiens (Human)	CCS_HUMAN	N	0.489485	0.891244	4.72675	1	0.843542	8.48212	0.355577	1	1.55174	0.25055	2
523062	Q5BKZ1	Zinc finger protein 326 - Homo sapiens (Human)	ZN326_HUMAN	N	0.490546	0.217355	0.0962856	1.16241	1.30791	4.24106	1.32624	2.84077	0.182693	0.825553	2
509807	P63098	Calcineurin subunit B isoform 1 (Protein phosphatase 2B regulatory subunit 1) (Protein phosphatase 3 regulatory subunit B alpha isoform 1) - Homo sapiens (Human)	CANB1_HUMAN	N	0.490862	0.1188	0.525194	3.99672	9.34448	0.09767	1	0.199301	1	1.64432	2
517968	Q13153	Serine/threonine-protein kinase PAK 1 (EC 2.7.11.1) (p21-activated kinase 1) (PAK-1) (P65-PAK) (Alpha-PAK) - Homo sapiens (Human)	PAK1_HUMAN	N	0.492305	0.373858	0.489933	3.14309	1.34738	0.916681	0.309967	0.481464	4.1993	0.951269	2
520547	Q15797	Mothers against decapentaplegic homolog 1 (SMAD 1) (Mothers against DPP homolog 1) (Mad-related protein 1) (Transforming growth factor-beta signaling protein 1) (BSP-1) (hSMAD1) (JV4-1) - Homo sapiens (Human)	SMAD1_HUMAN	N	0.492396	0.754566	1	1	1.30791	4.38395	0.221699	2.43587	0.456733	0.219115	2
520568	Q99717	Mothers against decapentaplegic homolog 5 (SMAD 5) (Mothers against DPP homolog 5) (Smad5) (hSmad5) (JV5-1) - Homo sapiens (Human)	SMAD5_HUMAN	N	0.492396	0.754566	1	1	1.30791	4.38395	0.221699	2.43587	0.456733	0.219115	2
520588	O15198	Mothers against decapentaplegic homolog 9 (SMAD 9) (Mothers against DPP homolog 9) (Smad9) (Madh6) - Homo sapiens (Human)	SMAD9_HUMAN	N	0.492396	0.754566	1	1	1.30791	4.38395	0.221699	2.43587	0.456733	0.219115	2
508459	Q30167	HLA class II histocompatibility antigen, DRB1-10 beta chain precursor (MHC class I antigen DRB1*10) (DRw10) - Homo sapiens (Human)	2B1A_HUMAN	N	0.492937	0.507475	17.1541	1.07134	0.984603	1.36402	2.13873	1.84519	1	0.632979	2
513926	P01914	HLA class II histocompatibility antigen, DR-1 beta chain precursor (Clone P2-beta-4) - Homo sapiens (Human)	HB2C_HUMAN	N	0.492937	0.507475	17.1541	1.07134	0.984603	1.36402	2.13873	1.84519	1	0.632979	2
509505	P08236	Beta-glucuronidase precursor (EC 3.2.1.31) (Beta-G1) - Homo sapiens (Human)	BGLR_HUMAN	Y	0.494015	2.28007	0.0856908	0.473645	0.333287	36.4062	1.50112	1.48206	1.5244	0.201745	2
512016	Q13217	DnaJ homolog subfamily C member 3 (Interferon-induced, double-stranded RNA-activated protein kinase inhibitor) (Protein kinase inhibitor p58) (Protein kinase inhibitor of 58 kDa) - Homo sapiens (Human)	DNJC3_HUMAN	N	0.494506	0.61007	0.450269	0.825603	0.679792	1.35614	2.24913	1.22971	2.00602	1.19045	2
517163	P61916	Epididymal secretory protein E1 precursor (Niemann-Pick disease type C2 protein) (hE1) - Homo sapiens (Human)	NPC2_HUMAN	N	0.494668	1.01708	0.957958	0.916261	0.551649	2.78845	1.9276	1.46812	3.89927	1.30564	2
514976	Q12840	Kinesin heavy chain isoform 5A (Neuronal kinesin heavy chain) (NKHC) (Kinesin heavy chain neuron-specific 1) - Homo sapiens (Human)	KIF5A_HUMAN	N	0.494693	1.12186	0.776249	2.13475	1.73658	8.62501	1.19024	0.745752	0.570554	1.59634	2
522424	P23763	Vesicle-associated membrane protein 1 (VAMP-1) (Synaptobrevin-1) - Homo sapiens (Human)	VAMP1_HUMAN	Y	0.494962	1.54427	1	1	1	4.24106	0.253853	1	3.93434	1	2
509698	Q9UQB8	Brain-specific angiogenesis inhibitor 1-associated protein 2 (BAI1-associated protein 2) (BAI-associated protein 2) (Protein BAP2) (Insulin receptor substrate p53) (IRSp53) (Insulin receptor substrate protein of 53 kDa) (Insulin recept	BAIP2_HUMAN	N	0.495387	1.23119	0.16106	0.29084	0.265425	1	0.188914	5.88561	3.66939	0.386481	2
512303	P49770	Translation initiation factor eIF-2B subunit beta (eIF-2B GDP-GTP exchange factor subunit beta) (S20I15) (S20III15) - Homo sapiens (Human)	EI2BB_HUMAN	N	0.496376	3.40269	1	1	0.62887	1	2.23236	0.291225	0.0590267	1	2
512316	Q9H201	Epsin-3 (EPS-15-interacting protein 3) - Homo sapiens (Human)	EPN3_HUMAN	N	0.496756	1	1	1	3.11483	1	6.64408	0.296981	1.18389	0.8876	2
519906	P07602	Proactivator polypeptide precursor [Contains: Saposin A (Protein A); Saposin B-Val; Saposin B (Sphingolipid activator protein 1) (SAP-1) (Cerebroside sulfate activator) (CSAct) (Dispersin) (Sulfatide/GM1 activator); Saposin C (Co-beta-gl	SAP_HUMAN	N	0.49706	0.632505	1.42086	0.845007	0.493124	6.17647	1.4845	3.48257	1.46912	1.27199	2
519397	Q14699	Raftlin (Raft-linking protein) (Cell migration-inducing gene 2 protein) - Homo sapiens (Human)	RFTN1_HUMAN	N	0.497932	1	1	1.15177	0.93408	8.76789	1.53717	0.696427	3.66939	0.233781	2
521154	P23258	Tubulin gamma-1 chain (Gamma-1 tubulin) (Gamma-tubulin complex component 1) (GCP-1) - Homo sapiens (Human)	TBG1_HUMAN	N	0.498372	0.739592	1.45032	3.99672	0.256923	0.989783	0.678187	1.70262	0.159639	3.38679	2
511559	Q9Y3R5	Protein C21orf5 - Homo sapiens (Human)	CU005_HUMAN	N	0.499654	1	1	1	0.567555	25.9465	0.111997	11.2752	1	1	2
520342	Q9UQ13	Leucine-rich repeat protein SHOC-2 (Ras-binding protein Sur-8) - Homo sapiens (Human)	SHOC2_HUMAN	N	0.499837	1	1.57558	3.28194	0.250295	17.0357	1.3733	1	1.32139	0.0899019	2
516515	Q86WG5	Myotubularin-related protein 13 (SET-binding factor 2) - Homo sapiens (Human)	MTMRD_HUMAN	N	0.500319	1	1	1	0.265425	1	1	4.78274	3.66939	1	2
520161	Q8WYJ6	Septin-1 (LARP) (Serologically defined breast cancer antigen NY-BR-24) - Homo sapiens (Human)	SEPT1_HUMAN	N	0.501532	1	1	3.99672	0.265425	4.38395	1	1	1	1	2
522846	P25311	Zinc-alpha-2-glycoprotein precursor (Zn-alpha-2-glycoprotein) (Zn-alpha-2-GP) - Homo sapiens (Human)	ZA2G_HUMAN	N	0.501565	1	9.33169	0.917333	0.132712	4.3125	0.856456	1.42039	0.17708	1.3217	2
521404	P13693	Translationally-controlled tumor protein (TCTP) (p23) (Histamine-releasing factor) (HRF) (Fortilin) - Homo sapiens (Human)	TCTP_HUMAN	N	0.50161	1.43771	0.568373	0.764831	1.62148	2.23711	1.44047	1.11627	2.31033	0.809292	2
519589	P05109	Protein S100-A8 (S100 calcium-binding protein A8) (Calgranulin-A) (Migration inhibitory factor-related protein 8) (MRP-8) (Cystic fibrosis antigen) (CFAG) (P8) (Leukocyte L1 complex light chain) (Calprotectin L1L subunit) (Urinary ston	S10A8_HUMAN	N	0.502085	1.56931	2.03549	1.07998	0.917233	2.19863	1.57629	1.99527	0.108764	0.645415	2
508540	P54646	5'-AMP-activated protein kinase catalytic subunit alpha-2 (EC 2.7.11.1) (AMPK alpha-2 chain) - Homo sapiens (Human)	AAPK2_HUMAN	N	0.502417	1	0.32212	3.99672	0.962312	0.19534	1.05025	0.151485	1	3.79672	2
512603	Q8NCA5	Protein FAM98A - Homo sapiens (Human)	FA98A_HUMAN	N	0.502601	1.14003	0.203055	6.6416	0.320771	4.3125	0.948205	1	0.247871	0.854879	2
510476	P13688	Carcinoembryonic antigen-related cell adhesion molecule 1 precursor (Biliary glycoprotein 1) (BGP-1) (CD66 antigen) (CD66a antigen) - Homo sapiens (Human)	CEAM1_HUMAN	Y	0.503075	1	1	52.4274	0.538406	4.3125	0.110368	0.291225	1	1	2
522598	O75191	Xylulose kinase (EC 2.7.1.17) (Xylulokinase) - Homo sapiens (Human)	XYLB_HUMAN	N	0.50327	1	4.89129	1	3.11483	1	1	1	0.281925	1	2
516765	P30419	Glycylpeptide N-tetradecanoyltransferase 1 (EC 2.3.1.97) (Peptide N-myristoyltransferase 1) (Myristoyl-CoA:protein N-myristoyltransferase 1) (NMT 1) (Type I N-myristoyltransferase) - Homo sapiens (Human)	NMT1_HUMAN	N	0.504294	1.73054	0.207189	0.657127	5.27553	2.52721	1.28593	0.588561	0.248875	0.991031	2
515968	Q9UBB5	Methyl-CpG-binding domain protein 2 (Methyl-CpG-binding protein MBD2) (Demethylase) (DMTase) - Homo sapiens (Human)	MBD2_HUMAN	N	0.504483	3.40269	1.34352	0.675219	0.894533	1	1.42231	1.44903	0.973065	3.79672	2
508812	Q5JQC9	A-kinase anchor protein 4 precursor (Protein kinase A-anchoring protein 4) (PRKA4) (A-kinase anchor protein 82 kDa) (AKAP 82) (hAKAP82) (Major sperm fibrous sheath protein) (HI) - Homo sapiens (Human)	AKAP4_HUMAN	N	0.505018	0.236611	0.742744	1.37086	1.30267	2.27652	0.0976317	2.73955	0.546796	0.233781	2
514325	P17483	Homeobox protein Hox-B4 (Hox-2F) (Hox-2.6) - Homo sapiens (Human)	HXB4_HUMAN	N	0.505314	1	8.37069	1	3.62555	0.19534	1	1	1	1	2
508434	P30505	HLA class I histocompatibility antigen, Cw-8 alpha chain precursor (MHC class I antigen Cw*8) - Homo sapiens (Human)	1C08_HUMAN	Y	0.505415	1.83823	2.24267	1.13695	0.874509	1.46125	0.605735	1.33705	3.91951	0.99804	2
509406	P56211	cAMP-regulated phosphoprotein 19 (ARPP-19) - Homo sapiens (Human)	ARP19_HUMAN	N	0.505623	1.3785	0.941922	1	3.37019	1.6569	2.7466	1.34405	1.03449	0.739827	2
520637	P52788	Spermine synthase (EC 2.5.1.22) (Spermidine aminopropyltransferase) (SPMSY) - Homo sapiens (Human)	SPSY_HUMAN	N	0.506617	4.13549	0.274675	1	3.99151	1	0.258924	0.241856	1.31256	1	2
518476	P27169	Serum paraoxonase/arylesterase 1 (EC 3.1.1.2) (EC 3.1.8.1) (PON 1) (Serum aryldialkylphosphatase 1) (A-esterase 1) (Aromatic esterase 1) (K-45) - Homo sapiens (Human)	PON1_HUMAN	N	0.508004	1	14.6739	1	0.250295	0.619195	3.02769	1	1	1	2
522080	P09936	Ubiquitin carboxyl-terminal hydrolase isozyme L1 (EC 3.4.19.12) (EC 6.-.-.-) (UCH-L1) (Ubiquitin thioesterase L1) (Neuron cytoplasmic protein 9.5) (PGP 9.5) (PGP9.5) - Homo sapiens (Human)	UCHL1_HUMAN	N	0.50803	3.40269	0.470961	0.13359	1	1	0.711154	0.06594	1	2.05984	2
518322	Q96JY6	PDZ and LIM domain protein 2 (PDZ-LIM protein mystique) (PDZ-LIM protein) - Homo sapiens (Human)	PDLI2_HUMAN	N	0.509639	2.0299	1	1	1	1	3.32204	1	1	1	2
520933	Q9UL54	Serine/threonine-protein kinase TAO2 (EC 2.7.11.1) (Thousand and one amino acid protein 2) (Prostate-derived STE20-like kinase 1) (PSK-1) (Kinase from chicken homolog C) (hKFC-C) - Homo sapiens (Human)	TAOK2_HUMAN	Y	0.510297	0.217355	1	1	0.265425	1	3.02769	0.30297	1	3.65676	2
519756	P36954	DNA-directed RNA polymerase II subunit I (EC 2.7.7.6) (DNA-directed RNA polymerase II 14.5 kDa polypeptide) (RPB9) (RPB14.5) - Homo sapiens (Human)	RPB9_HUMAN	N	0.510881	0.80848	1.14965	2.32481	1.67632	0.570907	0.843309	4.4419	1.72796	1.29485	2
514906	P17301	Integrin alpha-2 precursor (Platelet membrane glycoprotein Ia) (GPIa) (Collagen receptor) (VLA-2 alpha chain) (CD49b antigen) - Homo sapiens (Human)	ITA2_HUMAN	N	0.511592	1	1	1	1	0.504744	4.67141	0.30297	7.33878	1	2
513060	P02792	Ferritin light chain (Ferritin L subunit) - Homo sapiens (Human)	FRIL_HUMAN	N	0.511767	1.13303	0.770279	0.536045	0.933474	1.99743	2.69036	6.41454	1.80957	1.07931	2
520382	O95347	Structural maintenance of chromosome 2-like 1 protein (Chromosome-associated protein E) (hCAP-E) (XCAP-E homolog) - Homo sapiens (Human)	SMC2_HUMAN	N	0.512565	1.0893	1	1	1	1	3.54718	4.78274	0.281925	0.770582	2
511775	Q08495	Dematin (Erythrocyte membrane protein band 4.9) - Homo sapiens (Human)	DEMA_HUMAN	N	0.512757	1	78.6769	1	1	0.0377404	0.223995	1	1	7.45348	2
518766	P49593	Ca(2+)/calmodulin-dependent protein kinase phosphatase (EC 3.1.3.16) (CaM-kinase phosphatase) (CaMKPase) (Partner of PIX 2) (hFEM-2) (Protein phosphatase 1F) - Homo sapiens (Human)	PPM1F_HUMAN	N	0.513313	1.0893	1	1.53847	0.868289	4.38395	3.32204	0.30297	1	1	2
508534	O43741	5'-AMP-activated protein kinase subunit beta-2 (AMPK beta-2 chain) - Homo sapiens (Human)	AAKB2_HUMAN	N	0.513327	1	1	1	0.265425	1	3.02769	1	0.08854	3.79672	2
519267	P18577	Blood group Rh(CE) polypeptide (Rhesus C/E antigens) (Rh30A) (RhIXB) (Rh polypeptide 1) (RhPI) (CD240CE antigen) - Homo sapiens (Human)	RHCE_HUMAN	Y	0.513854	1	18.6702	1	1	0.117042	1	1	1	3.51679	2
519268	Q02161	Blood group Rh(D) polypeptide (Rhesus D antigen) (RHXIII) (Rh polypeptide 2) (RhPII) (CD240D antigen) - Homo sapiens (Human)	RHD_HUMAN	Y	0.513854	1	18.6702	1	1	0.117042	1	1	1	3.51679	2
515375	Q86W92	Liprin-beta-1 (Protein tyrosine phosphatase receptor type f polypeptide-interacting protein-binding protein 1) (PTPRF-interacting protein-binding protein 1) (hSGT2) - Homo sapiens (Human)	LIPB1_HUMAN	N	0.514028	0.227027	0.148256	10.5795	7.25111	1	0.161524	0.817342	0.809342	1	2
509156	Q96CW1	AP-2 complex subunit mu-1 (Adaptin mu-1) (AP-2 mu-2 chain) (Clathrin coat assembly protein AP50) (Clathrin coat-associated protein AP50) (Plasma membrane adaptor AP-2 50 kDa protein) (HA2 50 kDa subunit) (Clathrin assembly protein comp	AP2M1_HUMAN	N	0.514439	0.31526	12.1722	0.892372	0.852274	3.0691	1.48929	1.79159	0.453247	0.995651	2
509214	Q9NP61	ADP-ribosylation factor GTPase-activating protein 3 (ARF GAP 3) - Homo sapiens (Human)	ARFG3_HUMAN	N	0.514737	0.974256	0.274675	1	3.37019	1	6.34973	1	1	1	2
508583	P61221	ATP-binding cassette sub-family E member 1 (RNase L inhibitor) (Ribonuclease 4 inhibitor) (RNS4I) (2'-5' oligoadenylate-binding protein) (HuHP68) - Homo sapiens (Human)	ABCE1_HUMAN	N	0.515069	0.898668	0.229084	0.645479	2.32354	2.52024	0.770639	0.936556	0.383489	0.773228	2
521665	Q9Y5J7	Mitochondrial import inner membrane translocase subunit Tim9 - Homo sapiens (Human)	TIM9_HUMAN	N	0.51541	0.967226	0.4331	0.630145	1.35521	0.500564	2.57221	0.607454	2.42871	0.928845	2
520383	Q6GMV2	SET and MYND domain-containing protein 5 (Protein NN8-4AG) - Homo sapiens (Human)	SMYD5_HUMAN	N	0.515528	1	0.400725	3.99672	1.73658	2.52721	1.77359	1.0589	1.34647	0.863231	2
520429	Q96H20	Vacuolar sorting protein SNF8 (ELL-associated protein of 30 kDa) - Homo sapiens (Human)	SNF8_HUMAN	N	0.515555	1	4.89129	1	1	1	1	1	3.66939	0.881132	2
514497	P01876	Ig alpha-1 chain C region - Homo sapiens (Human)	IGHA1_HUMAN	N	0.516735	5.37528	3.98967	0.837893	0.178393	1.06601	0.860659	1.19248	0.0756385	1.06506	2
510720	Q96NY7	Chloride intracellular channel 6 - Homo sapiens (Human)	CLIC6_HUMAN	N	0.517941	2.07027	0.393889	1.41331	1.32874	19.5134	0.214643	1.48841	1.78718	1.25928	2
522879	Q6FIF0	AN1-type zinc finger protein 6 (Zinc finger A20 domain-containing protein 3) (Associated with PRK1 protein) - Homo sapiens (Human)	ZFAN6_HUMAN	N	0.518153	3.40269	0.32212	1	3.62555	1	0.177104	1	0.281925	1	2
522386	O60504	Vinexin (Sorbin and SH3 domain-containing protein 3) (SH3-containing adapter molecule 1) (SCAM-1) - Homo sapiens (Human)	VINEX_HUMAN	N	0.51892	1	1	1	7.25111	0.146	3.02769	0.296981	0.327839	0.881132	2
518995	Q8IUD2	ELKS/RAB6-interacting/CAST family member 1 (RAB6-interacting protein 2) (ERC protein 1) - Homo sapiens (Human)	RB6I2_HUMAN	N	0.519239	0.217355	0.32212	3.48722	1	1	6.05538	0.30297	0.17708	0.125275	2
521770	Q15629	Translocation-associated membrane protein 1 - Homo sapiens (Human)	TRAM1_HUMAN	Y	0.519533	0.770191	0.404191	0.0691086	1	1	1.82733	2.02935	0.649775	3.79672	2
510332	O75976	Carboxypeptidase D precursor (EC 3.4.17.22) (Metallocarboxypeptidase D) (gp180) - Homo sapiens (Human)	CBPD_HUMAN	Y	0.519619	1	1	4.64323	1	1	3.17486	1.44903	1	0.25055	2
520175	Q9HAT2	Sialate O-acetylesterase precursor (EC 3.1.1.53) (Sialic acid-specific 9-O-acetylesterase) (H-Lse) - Homo sapiens (Human)	SIAE_HUMAN	N	0.519861	0.233374	0.238031	0.231033	0.250295	12.1018	1.05025	0.30297	3.20818	1.35677	2
514723	P08779	Keratin, type I cytoskeletal 16 (Cytokeratin-16) (CK-16) (Keratin-16) (K16) - Homo sapiens (Human)	K1C16_HUMAN	N	0.519961	2.16522	1.00142	0.713261	0.485865	0.597618	0.498039	1.39108	2.02837	0.819919	2
512616	P16930	Fumarylacetoacetase (EC 3.7.1.2) (Fumarylacetoacetate hydrolase) (Beta-diketonase) (FAA) - Homo sapiens (Human)	FAAA_HUMAN	N	0.520031	1.17003	0.651797	0.247079	4.40488	2.52721	0.489137	1.31916	1	1	2
508989	P50995	Annexin A11 (Annexin XI) (Calcyclin-associated annexin 50) (CAP-50) (56 kDa autoantigen) - Homo sapiens (Human)	ANX11_HUMAN	N	0.520698	2.22603	1.15649	1.91156	1.03771	0.544193	0.996226	0.816238	3.51995	1.45982	2
513944	P01916	HLA class II histocompatibility antigen, SB beta chain (Fragment) - Homo sapiens (Human)	HB2S_HUMAN	Y	0.520979	0.717072	51.1192	1.19662	0.534276	1.10732	3.83194	0.747684	1	1.06632	2
518631	O75400	Pre-mRNA-processing factor 40 homolog A (Formin-binding protein 3) (Formin-binding protein 11) (Huntingtin-interacting protein HYPA) (Huntingtin yeast partner A) (Fas ligand-associated factor 1) (NY-REN-6 antigen) - Homo sapiens (Human	PRP40_HUMAN	N	0.521584	0.739592	0.725162	15.9869	1.23335	4.38395	0.331559	0.529759	0.483088	0.569919	2
512675	O95571	ETHE1 protein, mitochondrial precursor (EC 3.-.-.-) (Ethylmalonic encephalopathy protein 1) (Hepatoma subtracted clone one protein) - Homo sapiens (Human)	ETHE1_HUMAN	N	0.522099	0.611531	2.80064	1.14752	1.30243	1.69214	0.922739	0.957139	0.905568	2.29378	2
515463	P18135	Ig kappa chain V-III region HAH precursor - Homo sapiens (Human)	KV3L_HUMAN	N	0.522143	1	2.60202	0.573623	1	1.67085	0.929902	1.74737	0.217528	3.79672	2
515464	P18136	Ig kappa chain V-III region HIC precursor - Homo sapiens (Human)	KV3M_HUMAN	N	0.522143	1	2.60202	0.573623	1	1.67085	0.929902	1.74737	0.217528	3.79672	2
520510	P35713	Transcription factor SOX-18 - Homo sapiens (Human)	SOX18_HUMAN	N	0.523564	3.40269	1	1	1	1	1	1	0.649775	3.65676	2
520541	P57073	Transcription factor SOX-8 - Homo sapiens (Human)	SOX8_HUMAN	N	0.523564	3.40269	1	1	1	1	1	1	0.649775	3.65676	2
520542	P48436	Transcription factor SOX-9 - Homo sapiens (Human)	SOX9_HUMAN	N	0.523564	3.40269	1	1	1	1	1	1	0.649775	3.65676	2
509059	P40616	ADP-ribosylation factor-like protein 1 - Homo sapiens (Human)	ARL1_HUMAN	N	0.526242	1.03309	0.593992	1.16241	1.85685	1.08093	1.7281	2.07028	0.855831	2.15356	2
509365	O00244	Copper transport protein ATOX1 (Metal transport protein ATX1) - Homo sapiens (Human)	ATOX1_HUMAN	N	0.526467	1.54501	0.274675	1	0.843542	8.55357	0.37206	0.291225	4.1993	0.200313	2
519234	P23921	Ribonucleoside-diphosphate reductase large subunit (EC 1.17.4.1) (Ribonucleoside-diphosphate reductase M1 subunit) (Ribonucleotide reductase large chain) - Homo sapiens (Human)	RIR1_HUMAN	N	0.527342	1	1	1	2.54636	1	3.17486	1	1	1	2
516796	Q9C002	Normal mucosa of esophagus-specific gene 1 protein (Protein FOAP-11) - Homo sapiens (Human)	NMES1_HUMAN	Y	0.528009	3.40269	0.32212	1.26388	0.265425	8.62501	1	1.39285	1	1	2
511436	Q3LXA3	Dihydroxyacetone kinase (EC 2.7.1.29) (Glycerone kinase) (DHA kinase) - Homo sapiens (Human)	DAK_HUMAN	N	0.528805	0.772503	1	1	2.20244	2.01062	1	0.0841391	0.357765	0.898667	2
512032	O75937	DnaJ homolog subfamily C member 8 (Splicing protein spf31) - Homo sapiens (Human)	DNJC8_HUMAN	N	0.52936	0.687481	0.75518	1.00888	17.3617	6.43303	0.613801	1.28542	1.27356	0.870038	2
515313	P51812	Ribosomal protein S6 kinase alpha-3 (EC 2.7.11.1) (S6K-alpha 3) (90 kDa ribosomal protein S6 kinase 3) (p90-RSK 3) (Ribosomal S6 kinase 2) (RSK-2) (pp90RSK2) (Insulin-stimulated protein kinase 1) (ISPK-1) (MAP kinase-activated protein	KS6A3_HUMAN	N	0.529853	1	1	9.93298	2.91403	0.628315	0.657632	1.27219	0.281925	1	2
522029	P51784	Ubiquitin carboxyl-terminal hydrolase 11 (EC 3.1.2.15) (Ubiquitin thioesterase 11) (Ubiquitin-specific-processing protease 11) (Deubiquitinating enzyme 11) - Homo sapiens (Human)	UBP11_HUMAN	N	0.529954	0.217355	0.496601	1	0.453729	4.38395	0.177104	1.19433	0.798196	7.03359	2
521914	P07996	Thrombospondin-1 precursor - Homo sapiens (Human)	TSP1_HUMAN	N	0.530426	1	3.93896	1	0.173455	0.162826	0.065651	9.56549	1	1.18654	2
509131	Q4VCS5	Angiomotin - Homo sapiens (Human)	AMOT_HUMAN	N	0.530752	0.217355	0.064424	1	3.11483	1	6.05538	1	1.03449	1	2
514571	Q9UI26	Importin-11 (Imp11) (Ran-binding protein 11) (RanBP11) - Homo sapiens (Human)	IPO11_HUMAN	N	0.530984	1	0.525194	1	3.11483	1	3.17486	1	0.321563	0.870192	2
523265	Q8N1G0	Zinc finger protein 687 - Homo sapiens (Human)	ZN687_HUMAN	N	0.53171	1	0.485417	0.214765	1	1	3.02769	1	0.0725094	9.07191	2
512029	Q14574	Desmocollin-3 precursor (Desmocollin-4) (HT-CP) - Homo sapiens (Human)	DSC3_HUMAN	Y	0.532224	1	0.32212	4.64323	1	0.117042	1	0.30297	3.66939	1	2
513067	Q6UN15	Pre-mRNA 3'-end-processing factor FIP1 (FIP1-like 1) (Factor interacting with PAP) (hFip1) (Rearranged in hypereosinophilia) - Homo sapiens (Human)	FIP1_HUMAN	N	0.533325	0.954092	0.58013	3.99672	0.860178	15.2009	0.560835	1.27701	0.211674	1.14824	2
516557	O14974	Protein phosphatase 1 regulatory subunit 12A (Myosin phosphatase-targeting subunit 1) (Myosin phosphatase target subunit 1) (Protein phosphatase myosin-binding subunit) - Homo sapiens (Human)	MYPT1_HUMAN	N	0.533979	2.55018	0.135773	2.21462	1.68708	0.842405	0.979415	0.33644	0.659166	0.875312	2
509309	Q93084	Sarcoplasmic/endoplasmic reticulum calcium ATPase 3 (EC 3.6.3.8) (Calcium pump 3) (SERCA3) (SR Ca(2+)-ATPase 3) - Homo sapiens (Human)	AT2A3_HUMAN	Y	0.534803	0.536928	1.79901	3.22448	0.683913	0.767536	1.49709	0.407193	2.45222	1.26349	2
513973	P82979	Nuclear protein Hcc-1 (Proliferation-associated cytokine-inducible protein CIP29) (Cytokine-induced protein of 29 kDa) - Homo sapiens (Human)	HCC1_HUMAN	N	0.535086	1.19259	0.216905	1.82667	2.06972	3.94559	1.15074	0.620061	0.575213	0.777869	2
516892	P51970	NADH dehydrogenase [ubiquinone] 1 alpha subcomplex subunit 8 (EC 1.6.5.3) (EC 1.6.99.3) (NADH-ubiquinone oxidoreductase 19 kDa subunit) (Complex I-19kD) (CI-19kD) (Complex I-PGIV) (CI-PGIV) - Homo sapiens (Human)	NDUA8_HUMAN	N	0.535896	0.375705	0.679585	1.50497	0.795721	0.28307	3.26115	0.573041	2.21838	1.32078	2
511982	Q9BQ39	ATP-dependent RNA helicase DDX50 (EC 3.6.1.-) (DEAD box protein 50) (Nucleolar protein Gu2) (Gu-beta) - Homo sapiens (Human)	DDX50_HUMAN	N	0.536061	0.337146	0.36622	1.4815	2.0769	8.76789	1.12218	0.621248	0.625894	0.459166	2
513182	Q9BSJ2	Gamma-tubulin complex component 2 (GCP-2) (Spindle pole body protein Spc97 homolog) (hSpc97) (hGCP2) (h103p) - Homo sapiens (Human)	GCP2_HUMAN	N	0.536212	1	0.32212	1	3.11483	1	3.32204	1	1	1	2
512260	P17813	Endoglin precursor (CD105 antigen) - Homo sapiens (Human)	EGLN_HUMAN	Y	0.539795	1	1	1	0.596355	10.7455	1	4.10105	1	1	2
521521	Q9Y3A6	Transmembrane emp24 domain-containing protein 5 precursor - Homo sapiens (Human)	TMED5_HUMAN	Y	0.540007	6.49946	1.82756	0.493754	0.250295	1	0.514441	1.2425	7.86869	1	2
511121	Q9NX08	COMM domain-containing protein 8 - Homo sapiens (Human)	COMD8_HUMAN	N	0.540188	0.217355	0.32212	0.13359	10.1106	4.24106	1	1.29359	0.08854	0.881132	2
511693	Q13618	Cullin-3 (CUL-3) - Homo sapiens (Human)	CUL3_HUMAN	N	0.540619	0.544651	0.274675	3.99672	14.5022	0.09767	0.711154	0.696427	0.17708	0.706945	2
514872	O76095	Protein JTB precursor (Jumping translocation breakpoint protein) (Prostate androgen-regulated protein) (PAR protein) - Homo sapiens (Human)	JTB_HUMAN	Y	0.540816	4.79812	1	1	1	1	0.929902	0.291225	1	3.51679	2
515629	Q14914	NADP-dependent leukotriene B4 12-hydroxydehydrogenase (EC 1.3.1.74) (15-oxoprostaglandin 13-reductase) (EC 1.3.1.48) - Homo sapiens (Human)	LTB4D_HUMAN	N	0.541209	1	0.296512	1	9.34448	4.3125	1.3733	0.199301	1.48155	0.801251	2
516798	Q9HAN9	Nicotinamide mononucleotide adenylyltransferase 1 (EC 2.7.7.1) (NMN adenylyltransferase 1) - Homo sapiens (Human)	NMNA1_HUMAN	N	0.541339	1	1	1	3.62555	1	3.02769	1	1.43276	1	2
514271	P05204	Nonhistone chromosomal protein HMG-17 (High-mobility group nucleosome-binding domain-containing protein 2) - Homo sapiens (Human)	HMGN2_HUMAN	N	0.541451	0.377941	2.22352	1.23832	1.81287	0.0508055	0.558865	1.19045	2.65504	0.730557	2
510745	Q96JQ2	Calmin - Homo sapiens (Human)	CLMN_HUMAN	Y	0.542828	1	1.57558	1	7.25111	1	1	0.296981	1.36259	3.51679	2
520720	P11277	Spectrin beta chain, erythrocyte (Beta-I spectrin) - Homo sapiens (Human)	SPTB1_HUMAN	N	0.543769	0.2376	133.211	0.161735	1.96217	0.0177023	0.343591	0.1174	0.627464	10.1121	2
510061	Q14790	Caspase-8 precursor (EC 3.4.22.-) (CASP-8) (ICE-like apoptotic protease 5) (MORT1-associated CED-3 homolog) (MACH) (FADD-homologous ICE/CED-3-like protease) (FADD-like ICE) (FLICE) (Apoptotic cysteine protease) (Apoptotic protease Mch-	CASP8_HUMAN	N	0.544162	1	1	1	3.62555	4.24106	0.223995	1	0.08854	1	2
514995	O60282	Kinesin heavy chain isoform 5C (Kinesin heavy chain neuron-specific 2) - Homo sapiens (Human)	KIF5C_HUMAN	N	0.544392	1.12186	0.673	2.13475	1.73658	8.62501	1.19024	0.745752	0.570554	1.59634	2
518566	Q12972	Nuclear inhibitor of protein phosphatase 1 (NIPP-1) (Protein phosphatase 1 regulatory inhibitor subunit 8) [Includes: Activator of RNA decay (EC 3.1.4.-) (ARD-1)] - Homo sapiens (Human)	PP1R8_HUMAN	N	0.545337	0.644713	0.448118	0.29084	2.01298	10.7455	0.748629	0.565917	1.09275	0.411079	2
513377	P06241	Proto-oncogene tyrosine-protein kinase Fyn (EC 2.7.10.2) (p59-Fyn) (Protooncogene Syn) (SLK) - Homo sapiens (Human)	FYN_HUMAN	N	0.54654	3.40269	4.89129	1	0.265425	1	1.81247	1.2425	0.649775	1	2
522555	Q5TAP6	U3 small nucleolar RNA-associated protein 14 homolog C - Homo sapiens (Human)	UT14C_HUMAN	N	0.54668	1	1	1	1	4.24106	3.02769	1	0.281925	1	2
518540	P00491	Purine nucleoside phosphorylase (EC 2.4.2.1) (Inosine phosphorylase) (PNP) - Homo sapiens (Human)	PNPH_HUMAN	N	0.547116	20.502	0.431609	1.57536	0.970581	3.52527	1.89782	0.833258	0.175692	0.483876	2
508478	P21589	5'-nucleotidase precursor (EC 3.1.3.5) (Ecto-5'-nucleotidase) (5'-NT) (CD73 antigen) - Homo sapiens (Human)	5NTD_HUMAN	Y	0.547187	4.79812	1	0.573623	0.250295	0.0109339	1.92286	1	22.0363	1	2
509270	Q96QS3	Homeobox protein ARX (Aristaless-related homeobox) - Homo sapiens (Human)	ARX_HUMAN	N	0.547963	3.40269	1	1	1	1	0.292895	1	1	3.51679	2
517308	Q9Y6K5	2'-5'-oligoadenylate synthetase 3 (EC 2.7.7.-) ((2-5')oligo(A) synthetase 3) (2-5A synthetase 3) (p100 OAS) (p100OAS) - Homo sapiens (Human)	OAS3_HUMAN	N	0.548399	1	1	0.86773	2.216	0.717806	4.83588	0.173285	1	1.76226	2
509235	P10523	S-arrestin (Retinal S-antigen) (48 kDa protein) (S-AG) (Rod photoreceptor arrestin) - Homo sapiens (Human)	ARRS_HUMAN	N	0.548691	1	0.274675	0.247079	3.62555	1	3.02769	0.30297	1	1	2
521121	P21675	Transcription initiation factor TFIID subunit 1 (EC 2.7.11.1) (Transcription initiation factor TFIID 250 kDa subunit) (TAF(II)250) (TAFII-250) (TAFII250) (TBP-associated factor 250 kDa) (p250) (Cell cycle gene 1 protein) - Homo sapiens	TAF1_HUMAN	N	0.54877	1	0.32212	1	1	1	1	4.10105	1.29955	3.51679	2
515892	P01229	Lutropin subunit beta precursor (Luteinizing hormone subunit beta) (LSH-beta) (LSH-B) (LH-B) (Lutropin beta chain) - Homo sapiens (Human)	LSHB_HUMAN	N	0.549514	0.2376	1.90858	1	0.250295	1	0.223995	0.30297	3.66939	3.79672	2
513033	Q03591	Complement factor H-related protein 1 precursor (FHR-1) (H factor-like protein 1) (H-factor-like 1) (H36) - Homo sapiens (Human)	FHR1_HUMAN	N	0.549969	1	1	1	1	1	3.02769	0.296981	1	3.79672	2
513088	Q05932	Folylpolyglutamate synthase, mitochondrial precursor (EC 6.3.2.17) (Folylpoly-gamma-glutamate synthetase) (FPGS) (Tetrahydrofolate synthase) (Tetrahydrofolylpolyglutamate synthase) - Homo sapiens (Human)	FOLC_HUMAN	N	0.551031	1	1	1	0.257638	1	0.538289	0.151485	3.66939	3.51679	2
508592	Q8N2K0	Abhydrolase domain-containing protein 12 - Homo sapiens (Human)	ABD12_HUMAN	Y	0.554306	0.663469	1.28907	0.721539	0.658995	7.12555	0.787167	3.67586	1.81211	1.05101	2
517651	P22059	Oxysterol-binding protein 1 - Homo sapiens (Human)	OSBP1_HUMAN	N	0.55452	1.32445	0.489933	0.214765	1.67317	6.43303	0.833732	0.410031	0.269794	2.1372	2
521755	Q15643	Thyroid receptor-interacting protein 11 (TRIP-11) (Golgi-associated microtubule-binding protein 210) (GMAP-210) (Trip230) (Clonal evolution-related gene on chromosome 14) - Homo sapiens (Human)	TRIPB_HUMAN	N	0.555578	2.42544	0.214497	3.99672	0.250295	0.619195	1	0.291225	0.281925	1.6934	2
511964	Q15392	24-dehydrocholesterol reductase precursor (EC 1.3.1.-) (3-beta-hydroxysterol delta-24-reductase) (Seladin-1) (Diminuto/dwarf1 homolog) - Homo sapiens (Human)	DHC24_HUMAN	N	0.555604	0.725456	1.75685	0.921413	1.37099	4.3125	4.68871	0.979137	1.94691	1.16903	2
517777	Q9Y365	PCTP-like protein (PCTP-L) (StAR-related lipid transfer protein 10) (StARD10) (START domain-containing protein 10) (Serologically defined colon cancer antigen 28) (Antigen NY-CO-28) - Homo sapiens (Human)	PCTL_HUMAN	N	0.557041	7.5031	0.16106	1	1.32637	1	1	1	7.33878	1	2
522000	Q6DKK2	Tetratricopeptide repeat protein 19 (TPR repeat protein 19) - Homo sapiens (Human)	TTC19_HUMAN	N	0.557472	0.227027	0.203055	1	1	1	3.02769	0.30297	1.18389	3.79672	2
517206	Q8IVD9	NudC domain-containing protein 3 - Homo sapiens (Human)	NUDC3_HUMAN	N	0.559641	0.754566	0.16106	1.16241	1	4.38395	6.05538	0.196692	0.798196	0.25055	2
520958	O43776	Asparaginyl-tRNA synthetase, cytoplasmic (EC 6.1.1.22) (Asparagine--tRNA ligase) (AsnRS) - Homo sapiens (Human)	SYNC_HUMAN	N	0.559924	0.760674	0.36622	0.533689	2.63101	30.0446	0.821023	0.807224	0.700712	0.583949	2
520532	Q9UMY4	Sorting nexin-12 - Homo sapiens (Human)	SNX12_HUMAN	N	0.560868	0.149139	1	1	3.09698	4.24106	1.42231	1.39285	1	1	2
510267	P22681	E3 ubiquitin-protein ligase CBL (EC 6.3.2.-) (Signal transduction protein CBL) (Proto-oncogene c-CBL) (Casitas B-lineage lymphoma proto-oncogene) (RING finger protein 55) - Homo sapiens (Human)	CBL_HUMAN	N	0.560875	1	1	3.99672	3.37019	1	1	0.291225	0.08854	1	2
518500	Q9UG56	Phosphatidylserine decarboxylase proenzyme (EC 4.1.1.65) [Contains: Phosphatidylserine decarboxylase alpha chain; Phosphatidylserine decarboxylase beta chain] - Homo sapiens (Human)	PISD_HUMAN	N	0.561394	3.40269	1	1	1.30791	1	0.711154	0.30297	0.08854	3.65676	2
520305	P29353	SHC-transforming protein 1 (SH2 domain protein C1) (Src homology 2 domain-containing-transforming protein C1) - Homo sapiens (Human)	SHC1_HUMAN	N	0.56145	4.79812	0.32212	1	0.779626	4.24106	0.253853	0.621248	0.140963	1.21047	2
511849	Q9ULH1	130 kDa phosphatidylinositol 4,5-biphosphate-dependent ARF1 GTPase-activating protein (PIP2-dependent ARF1 GAP) (ADP-ribosylation factor-directed GTPase-activating protein 1) (ARF GTPase-activating protein 1) (Development and different	DDEF1_HUMAN	N	0.561931	3.40269	0.296512	1	0.413377	4.38395	1	0.310624	1	1	2
511247	Q99715	Collagen alpha-1(XII) chain precursor - Homo sapiens (Human)	COCA1_HUMAN	N	0.562298	1	0.16106	1	9.34448	0.0180007	36.4373	1	0.08321	0.094781	2
523095	O95049	Tight junction protein ZO-3 (Zonula occludens 3 protein) (Zona occludens 3 protein) (Tight junction protein 3) - Homo sapiens (Human)	ZO3_HUMAN	N	0.562366	0.739592	1	1	1	1	3.17486	0.119264	18.3469	1	2
[truncated: 4,883 more rows]
